# Supplementary material for: Square Planar Pt(II) Ion as Electron Donor in Pnictogen Bonding Interactions
Source: MDPI journal article supplement (doi:10.3390/inorganics11020080), 2023-02-15
Supplement: s1 [file s1]

Supplementary Material for manuscript:

# Square planar Pt(II) ion as electron donor in pnictogen bonding interactions

Sergi Burguera, Rosa M. Gomila, Antonio Bauzá and Antonio Frontera\*

Department of Chemistry, Universitat de les Illes Balears, Crta. de Valldemossa km 7.5, 07122 Palma, Spain

\* Correspondence: [toni.frontera@uib.es](mailto:toni.frontera@uib.es)

## Table of contents:

Figure S1 (MEP of Pt complex in RUVBIU)  
NBO analyses

Page 2

Pages 3-47

## 1. MEP surface

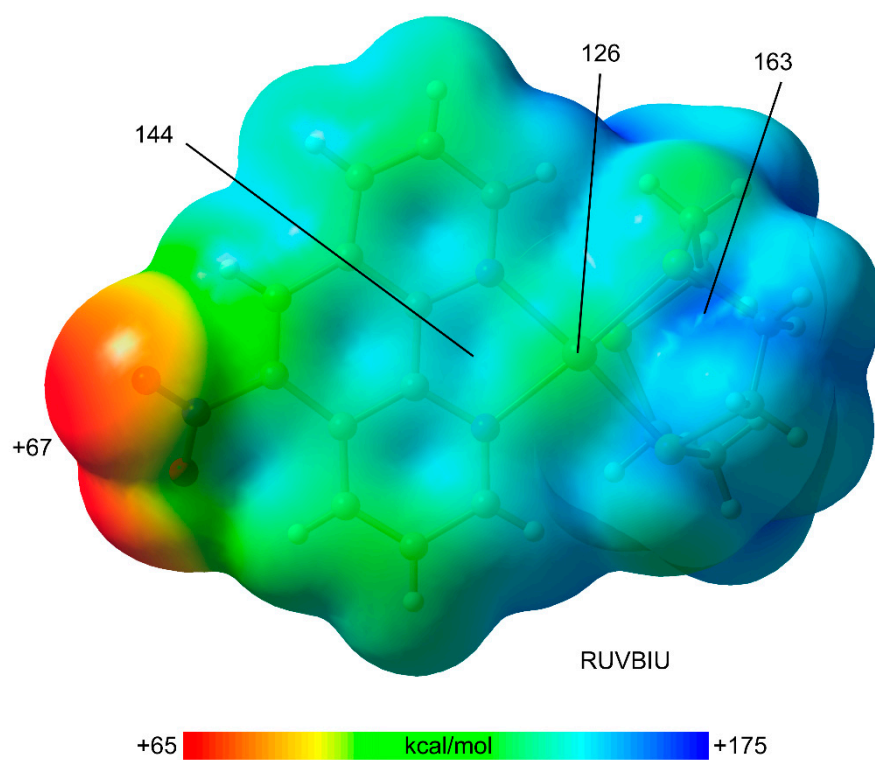

Figure S1. MEP surface of the cationic part of RUVBIU. The points at selected parts of the surface are given in kcal/mol

## 2. NBO second order analysis

### 2.1 RUVBIU

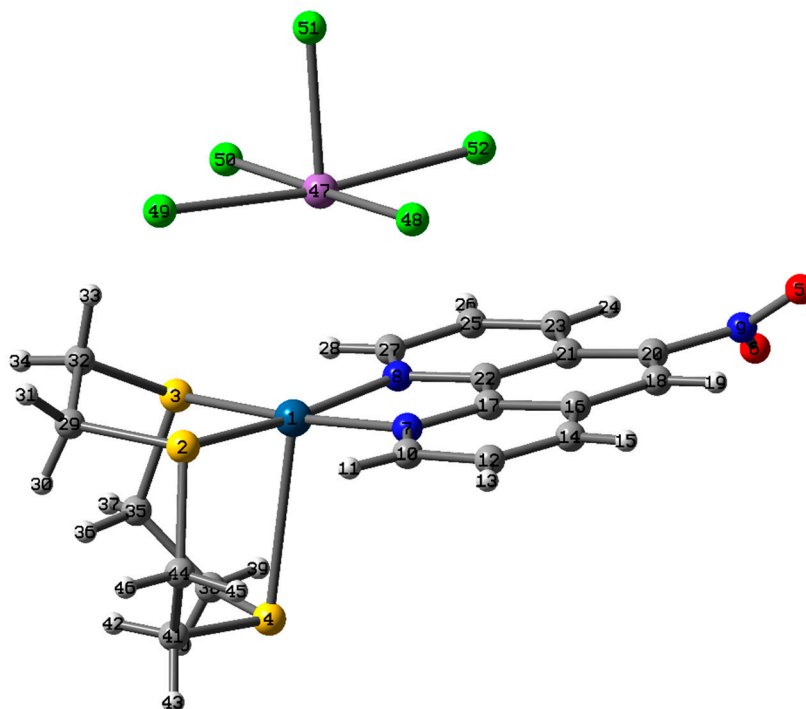

#### SECOND ORDER PERTURBATION THEORY ANALYSIS OF FOCK MATRIX IN NBO BASIS

Threshold for printing: 0.50 kcal/mol  
(Intermolecular threshold: 0.05 kcal/mol)

| Donor (L) NBO         | Acceptor (NL) NBO       | E(2)<br>kcal/mol | E(NL)-E(L)<br>a.u. | F(L,NL)<br>a.u. |
|-----------------------|-------------------------|------------------|--------------------|-----------------|
| =====                 |                         |                  |                    |                 |
| from unit 1 to unit 2 |                         |                  |                    |                 |
| 1. CR (1)Pt 1         | 414. RY (1) N 7         | 0.11             | 8.82               | 0.028           |
| 1. CR (1)Pt 1         | 440. RY (1) N 8         | 0.11             | 8.75               | 0.028           |
| 2. CR (2)Pt 1         | 440. RY (1) N 8         | 0.20             | 6.92               | 0.033           |
| 2. CR (2)Pt 1         | 441. RY (2) N 8         | 0.13             | 3.66               | 0.020           |
| 3. CR (3)Pt 1         | 414. RY (1) N 7         | 0.08             | 6.99               | 0.021           |
| 3. CR (3)Pt 1         | 440. RY (1) N 8         | 0.52             | 6.93               | 0.054           |
| 4. CR (4)Pt 1         | 414. RY (1) N 7         | 0.60             | 7.00               | 0.058           |
| 4. CR (4)Pt 1         | 415. RY (2) N 7         | 0.09             | 3.53               | 0.016           |
| 6. CR (2) S 2         | 440. RY (1) N 8         | 0.07             | 17.93              | 0.032           |
| 7. CR (3) S 2         | 440. RY (1) N 8         | 0.10             | 11.52              | 0.030           |
| 8. CR (4) S 2         | 440. RY (1) N 8         | 0.12             | 11.52              | 0.033           |
| 8. CR (4) S 2         | 441. RY (2) N 8         | 0.05             | 8.26               | 0.019           |
| 11. CR (2) S 3        | 414. RY (1) N 7         | 0.08             | 18.11              | 0.034           |
| 14. CR (5) S 3        | 414. RY (1) N 7         | 0.21             | 11.58              | 0.044           |
| 80. LP (1)Pt 1        | 195. BD* (1) N 7- C 10  | 0.25             | 0.76               | 0.012           |
| 80. LP (1)Pt 1        | 196. BD* (2) N 7- C 10  | 0.22             | 0.32               | 0.007           |
| 80. LP (1)Pt 1        | 197. BD* (1) N 7- C 17  | 0.36             | 0.73               | 0.014           |
| 80. LP (1)Pt 1        | 198. BD* (1) N 8- C 22  | 0.31             | 0.67               | 0.013           |
| 80. LP (1)Pt 1        | 199. BD* (1) N 8- C 27  | 0.16             | 0.81               | 0.010           |
| 80. LP (1)Pt 1        | 200. BD* (2) N 8- C 27  | 0.42             | 0.34               | 0.011           |
| 80. LP (1)Pt 1        | 203. BD* (1) C 10- C 12 | 0.19             | 0.82               | 0.011           |
| 80. LP (1)Pt 1        | 209. BD* (1) C 16- C 17 | 0.09             | 0.75               | 0.007           |
| 80. LP (1)Pt 1        | 216. BD* (1) C 21- C 22 | 0.16             | 0.81               | 0.010           |
| 80. LP (1)Pt 1        | 223. BD* (1) C 25- C 27 | 0.17             | 0.79               | 0.010           |
| 80. LP (1)Pt 1        | 414. RY (1) N 7         | 51.79            | 4.81               | 0.446           |
| 80. LP (1)Pt 1        | 415. RY (2) N 7         | 8.67             | 1.35               | 0.096           |
| 80. LP (1)Pt 1        | 416. RY (3) N 7         | 6.73             | 1.85               | 0.100           |
| 80. LP (1)Pt 1        | 417. RY (4) N 7         | 3.86             | 2.62               | 0.090           |
| 80. LP (1)Pt 1        | 420. RY (7) N 7         | 0.36             | 4.41               | 0.036           |
| 80. LP (1)Pt 1        | 422. RY (9) N 7         | 1.16             | 4.60               | 0.065           |
| 80. LP (1)Pt 1        | 423. RY (10) N 7        | 0.65             | 3.84               | 0.045           |
| 80. LP (1)Pt 1        | 424. RY (11) N 7        | 2.30             | 5.03               | 0.096           |
| 80. LP (1)Pt 1        | 425. RY (12) N 7        | 0.47             | 3.78               | 0.038           |
| 80. LP (1)Pt 1        | 426. RY (13) N 7        | 3.39             | 4.38               | 0.109           |
| 80. LP (1)Pt 1        | 427. RY (14) N 7        | 1.35             | 4.36               | 0.068           |
| 80. LP (1)Pt 1        | 428. RY (15) N 7        | 2.97             | 4.79               | 0.106           |
| 80. LP (1)Pt 1        | 429. RY (16) N 7        | 0.19             | 4.61               | 0.026           |
| 80. LP (1)Pt 1        | 430. RY (17) N 7        | 0.16             | 5.32               | 0.026           |
| 80. LP (1)Pt 1        | 431. RY (18) N 7        | 0.13             | 3.56               | 0.019           |
| 80. LP (1)Pt 1        | 432. RY (19) N 7        | 0.06             | 5.00               | 0.015           |
| 80. LP (1)Pt 1        | 433. RY (20) N 7        | 0.07             | 4.86               | 0.017           |
| 80. LP (1)Pt 1        | 434. RY (21) N 7        | 0.17             | 4.96               | 0.026           |
| 80. LP (1)Pt 1        | 435. RY (22) N 7        | 0.58             | 5.28               | 0.049           |
| 80. LP (1)Pt 1        | 436. RY (23) N 7        | 0.29             | 5.64               | 0.036           |
| 80. LP (1)Pt 1        | 437. RY (24) N 7        | 0.05             | 25.37              | 0.032           |
| 80. LP (1)Pt 1        | 439. RY (26) N 7        | 1.22             | 5.22               | 0.071           |
| 80. LP (1)Pt 1        | 440. RY (1) N 8         | 50.38            | 4.75               | 0.437           |

|                 |                   |       |       |       |
|-----------------|-------------------|-------|-------|-------|
| 80. LP ( 1)Pt 1 | 441. RY ( 2) N 8  | 16.39 | 1.49  | 0.139 |
| 80. LP ( 1)Pt 1 | 442. RY ( 3) N 8  | 3.30  | 1.83  | 0.069 |
| 80. LP ( 1)Pt 1 | 443. RY ( 4) N 8  | 4.41  | 2.71  | 0.098 |
| 80. LP ( 1)Pt 1 | 444. RY ( 5) N 8  | 0.10  | 2.32  | 0.013 |
| 80. LP ( 1)Pt 1 | 445. RY ( 6) N 8  | 0.10  | 2.45  | 0.014 |
| 80. LP ( 1)Pt 1 | 446. RY ( 7) N 8  | 0.19  | 3.66  | 0.023 |
| 80. LP ( 1)Pt 1 | 447. RY ( 8) N 8  | 0.16  | 3.20  | 0.020 |
| 80. LP ( 1)Pt 1 | 448. RY ( 9) N 8  | 0.53  | 4.64  | 0.044 |
| 80. LP ( 1)Pt 1 | 449. RY (10) N 8  | 0.26  | 4.18  | 0.029 |
| 80. LP ( 1)Pt 1 | 450. RY (11) N 8  | 0.61  | 4.83  | 0.048 |
| 80. LP ( 1)Pt 1 | 451. RY (12) N 8  | 5.60  | 3.97  | 0.133 |
| 80. LP ( 1)Pt 1 | 452. RY (13) N 8  | 6.58  | 3.89  | 0.143 |
| 80. LP ( 1)Pt 1 | 453. RY (14) N 8  | 1.27  | 4.77  | 0.069 |
| 80. LP ( 1)Pt 1 | 454. RY (15) N 8  | 0.08  | 4.64  | 0.017 |
| 80. LP ( 1)Pt 1 | 456. RY (17) N 8  | 0.13  | 4.94  | 0.023 |
| 80. LP ( 1)Pt 1 | 460. RY (21) N 8  | 0.30  | 5.15  | 0.035 |
| 80. LP ( 1)Pt 1 | 461. RY (22) N 8  | 0.08  | 4.96  | 0.018 |
| 80. LP ( 1)Pt 1 | 462. RY (23) N 8  | 0.20  | 5.05  | 0.028 |
| 80. LP ( 1)Pt 1 | 464. RY (25) N 8  | 1.79  | 5.27  | 0.087 |
| 80. LP ( 1)Pt 1 | 465. RY (26) N 8  | 0.08  | 26.40 | 0.041 |
| 80. LP ( 1)Pt 1 | 492. RY ( 1) C 10 | 5.94  | 2.04  | 0.098 |
| 80. LP ( 1)Pt 1 | 493. RY ( 2) C 10 | 0.84  | 1.50  | 0.032 |
| 80. LP ( 1)Pt 1 | 494. RY ( 3) C 10 | 2.09  | 1.84  | 0.055 |
| 80. LP ( 1)Pt 1 | 495. RY ( 4) C 10 | 8.83  | 1.88  | 0.115 |
| 80. LP ( 1)Pt 1 | 496. RY ( 5) C 10 | 0.21  | 2.50  | 0.020 |
| 80. LP ( 1)Pt 1 | 497. RY ( 6) C 10 | 1.11  | 3.64  | 0.057 |
| 80. LP ( 1)Pt 1 | 498. RY ( 7) C 10 | 1.18  | 1.89  | 0.042 |
| 80. LP ( 1)Pt 1 | 499. RY ( 8) C 10 | 8.46  | 3.07  | 0.144 |
| 80. LP ( 1)Pt 1 | 500. RY ( 9) C 10 | 0.08  | 3.01  | 0.014 |
| 80. LP ( 1)Pt 1 | 501. RY (10) C 10 | 0.79  | 2.51  | 0.040 |
| 80. LP ( 1)Pt 1 | 502. RY (11) C 10 | 0.64  | 4.10  | 0.046 |
| 80. LP ( 1)Pt 1 | 504. RY (13) C 10 | 3.83  | 3.03  | 0.096 |
| 80. LP ( 1)Pt 1 | 505. RY (14) C 10 | 0.13  | 2.94  | 0.017 |
| 80. LP ( 1)Pt 1 | 507. RY (16) C 10 | 0.60  | 3.51  | 0.041 |
| 80. LP ( 1)Pt 1 | 508. RY (17) C 10 | 0.63  | 3.46  | 0.042 |
| 80. LP ( 1)Pt 1 | 509. RY (18) C 10 | 0.09  | 3.75  | 0.017 |
| 80. LP ( 1)Pt 1 | 518. RY ( 1) H 11 | 6.18  | 1.72  | 0.092 |
| 80. LP ( 1)Pt 1 | 519. RY ( 2) H 11 | 0.72  | 2.60  | 0.039 |
| 80. LP ( 1)Pt 1 | 521. RY ( 4) H 11 | 0.22  | 2.98  | 0.023 |
| 80. LP ( 1)Pt 1 | 522. RY ( 5) H 11 | 0.69  | 3.60  | 0.045 |
| 80. LP ( 1)Pt 1 | 524. RY ( 2) C 12 | 0.08  | 2.02  | 0.012 |
| 80. LP ( 1)Pt 1 | 526. RY ( 4) C 12 | 0.11  | 1.67  | 0.012 |
| 80. LP ( 1)Pt 1 | 529. RY ( 7) C 12 | 0.07  | 3.06  | 0.013 |
| 80. LP ( 1)Pt 1 | 531. RY ( 9) C 12 | 0.15  | 1.87  | 0.015 |
| 80. LP ( 1)Pt 1 | 532. RY (10) C 12 | 0.10  | 3.62  | 0.017 |
| 80. LP ( 1)Pt 1 | 533. RY (11) C 12 | 0.46  | 2.57  | 0.031 |
| 80. LP ( 1)Pt 1 | 534. RY (12) C 12 | 0.07  | 3.53  | 0.014 |
| 80. LP ( 1)Pt 1 | 537. RY (15) C 12 | 0.18  | 3.57  | 0.023 |
| 80. LP ( 1)Pt 1 | 539. RY (17) C 12 | 0.05  | 3.92  | 0.013 |
| 80. LP ( 1)Pt 1 | 556. RY ( 3) C 14 | 0.25  | 1.42  | 0.017 |
| 80. LP ( 1)Pt 1 | 557. RY ( 4) C 14 | 0.42  | 1.69  | 0.024 |
| 80. LP ( 1)Pt 1 | 560. RY ( 7) C 14 | 0.18  | 2.53  | 0.019 |
| 80. LP ( 1)Pt 1 | 562. RY ( 9) C 14 | 0.22  | 3.13  | 0.024 |
| 80. LP ( 1)Pt 1 | 564. RY (11) C 14 | 0.85  | 2.87  | 0.044 |
| 80. LP ( 1)Pt 1 | 565. RY (12) C 14 | 0.11  | 3.28  | 0.017 |
| 80. LP ( 1)Pt 1 | 566. RY (13) C 14 | 0.09  | 2.56  | 0.013 |
| 80. LP ( 1)Pt 1 | 569. RY (16) C 14 | 0.08  | 3.37  | 0.015 |
| 80. LP ( 1)Pt 1 | 581. RY ( 2) H 15 | 0.16  | 2.16  | 0.017 |
| 80. LP ( 1)Pt 1 | 585. RY ( 1) C 16 | 0.08  | 2.06  | 0.011 |
| 80. LP ( 1)Pt 1 | 586. RY ( 2) C 16 | 0.59  | 2.10  | 0.031 |
| 80. LP ( 1)Pt 1 | 587. RY ( 3) C 16 | 0.17  | 1.42  | 0.014 |
| 80. LP ( 1)Pt 1 | 588. RY ( 4) C 16 | 0.31  | 1.80  | 0.021 |
| 80. LP ( 1)Pt 1 | 590. RY ( 6) C 16 | 0.44  | 4.28  | 0.039 |
| 80. LP ( 1)Pt 1 | 592. RY ( 8) C 16 | 0.24  | 3.39  | 0.025 |
| 80. LP ( 1)Pt 1 | 593. RY ( 9) C 16 | 0.14  | 3.41  | 0.020 |
| 80. LP ( 1)Pt 1 | 596. RY (12) C 16 | 0.74  | 2.80  | 0.041 |
| 80. LP ( 1)Pt 1 | 597. RY (13) C 16 | 0.15  | 4.28  | 0.023 |
| 80. LP ( 1)Pt 1 | 598. RY (14) C 16 | 0.35  | 2.65  | 0.027 |
| 80. LP ( 1)Pt 1 | 601. RY (17) C 16 | 0.23  | 3.02  | 0.024 |
| 80. LP ( 1)Pt 1 | 611. RY ( 1) C 17 | 15.88 | 2.63  | 0.182 |
| 80. LP ( 1)Pt 1 | 612. RY ( 2) C 17 | 1.84  | 1.92  | 0.053 |
| 80. LP ( 1)Pt 1 | 613. RY ( 3) C 17 | 4.18  | 1.57  | 0.072 |
| 80. LP ( 1)Pt 1 | 614. RY ( 4) C 17 | 19.98 | 2.94  | 0.216 |
| 80. LP ( 1)Pt 1 | 615. RY ( 5) C 17 | 3.99  | 3.32  | 0.103 |
| 80. LP ( 1)Pt 1 | 616. RY ( 6) C 17 | 6.29  | 2.71  | 0.116 |
| 80. LP ( 1)Pt 1 | 617. RY ( 7) C 17 | 0.75  | 2.94  | 0.042 |
| 80. LP ( 1)Pt 1 | 619. RY ( 9) C 17 | 0.68  | 3.22  | 0.042 |
| 80. LP ( 1)Pt 1 | 620. RY (10) C 17 | 0.71  | 3.16  | 0.042 |
| 80. LP ( 1)Pt 1 | 621. RY (11) C 17 | 0.06  | 3.46  | 0.013 |
| 80. LP ( 1)Pt 1 | 622. RY (12) C 17 | 5.81  | 3.60  | 0.129 |
| 80. LP ( 1)Pt 1 | 623. RY (13) C 17 | 0.25  | 3.31  | 0.026 |
| 80. LP ( 1)Pt 1 | 624. RY (14) C 17 | 0.17  | 3.48  | 0.021 |
| 80. LP ( 1)Pt 1 | 625. RY (15) C 17 | 2.86  | 4.36  | 0.100 |
| 80. LP ( 1)Pt 1 | 626. RY (16) C 17 | 0.08  | 4.36  | 0.016 |
| 80. LP ( 1)Pt 1 | 628. RY (18) C 17 | 1.85  | 2.87  | 0.065 |
| 80. LP ( 1)Pt 1 | 629. RY (19) C 17 | 0.07  | 3.79  | 0.014 |
| 80. LP ( 1)Pt 1 | 630. RY (20) C 17 | 0.21  | 4.06  | 0.026 |
| 80. LP ( 1)Pt 1 | 631. RY (21) C 17 | 0.73  | 3.82  | 0.047 |
| 80. LP ( 1)Pt 1 | 632. RY (22) C 17 | 0.38  | 5.00  | 0.039 |
| 80. LP ( 1)Pt 1 | 633. RY (23) C 17 | 0.20  | 4.12  | 0.025 |
| 80. LP ( 1)Pt 1 | 636. RY (26) C 17 | 0.25  | 4.36  | 0.029 |
| 80. LP ( 1)Pt 1 | 648. RY (12) C 18 | 0.06  | 3.06  | 0.012 |
| 80. LP ( 1)Pt 1 | 663. RY ( 1) H 19 | 0.06  | 1.92  | 0.010 |
| 80. LP ( 1)Pt 1 | 671. RY ( 4) C 20 | 0.06  | 1.69  | 0.009 |
| 80. LP ( 1)Pt 1 | 675. RY ( 8) C 20 | 0.07  | 3.21  | 0.013 |
| 80. LP ( 1)Pt 1 | 694. RY ( 1) C 21 | 0.13  | 1.97  | 0.014 |
| 80. LP ( 1)Pt 1 | 695. RY ( 2) C 21 | 0.57  | 1.99  | 0.030 |
| 80. LP ( 1)Pt 1 | 696. RY ( 3) C 21 | 0.32  | 1.71  | 0.021 |
| 80. LP ( 1)Pt 1 | 697. RY ( 4) C 21 | 0.24  | 1.52  | 0.017 |
| 80. LP ( 1)Pt 1 | 699. RY ( 6) C 21 | 0.58  | 3.97  | 0.043 |
| 80. LP ( 1)Pt 1 | 704. RY (11) C 21 | 1.55  | 2.86  | 0.059 |
| 80. LP ( 1)Pt 1 | 706. RY (13) C 21 | 0.20  | 2.97  | 0.022 |
| 80. LP ( 1)Pt 1 | 707. RY (14) C 21 | 0.11  | 3.79  | 0.018 |

|     |    |      |    |   |      |     |      |   |         |       |      |       |
|-----|----|------|----|---|------|-----|------|---|---------|-------|------|-------|
| 80. | LP | ( 1) | Pt | 1 | 720. | RY  | ( 1) | C | 22      | 13.24 | 2.47 | 0.162 |
| 80. | LP | ( 1) | Pt | 1 | 721. | RY  | ( 2) | C | 22      | 5.61  | 2.03 | 0.095 |
| 80. | LP | ( 1) | Pt | 1 | 722. | RY  | ( 3) | C | 22      | 7.36  | 1.70 | 0.100 |
| 80. | LP | ( 1) | Pt | 1 | 723. | RY  | ( 4) | C | 22      | 19.22 | 2.83 | 0.208 |
| 80. | LP | ( 1) | Pt | 1 | 724. | RY  | ( 5) | C | 22      | 2.29  | 2.82 | 0.072 |
| 80. | LP | ( 1) | Pt | 1 | 726. | RY  | ( 7) | C | 22      | 3.92  | 2.73 | 0.092 |
| 80. | LP | ( 1) | Pt | 1 | 727. | RY  | ( 8) | C | 22      | 0.07  | 3.13 | 0.013 |
| 80. | LP | ( 1) | Pt | 1 | 729. | RY  | (10) | C | 22      | 0.26  | 3.40 | 0.027 |
| 80. | LP | ( 1) | Pt | 1 | 730. | RY  | (11) | C | 22      | 8.64  | 3.87 | 0.163 |
| 80. | LP | ( 1) | Pt | 1 | 731. | RY  | (12) | C | 22      | 2.04  | 3.55 | 0.076 |
| 80. | LP | ( 1) | Pt | 1 | 732. | RY  | (13) | C | 22      | 1.59  | 3.37 | 0.065 |
| 80. | LP | ( 1) | Pt | 1 | 734. | RY  | (15) | C | 22      | 2.02  | 4.70 | 0.087 |
| 80. | LP | ( 1) | Pt | 1 | 735. | RY  | (16) | C | 22      | 0.90  | 4.31 | 0.056 |
| 80. | LP | ( 1) | Pt | 1 | 737. | RY  | (18) | C | 22      | 0.58  | 3.72 | 0.041 |
| 80. | LP | ( 1) | Pt | 1 | 738. | RY  | (19) | C | 22      | 0.27  | 4.61 | 0.031 |
| 80. | LP | ( 1) | Pt | 1 | 740. | RY  | (21) | C | 22      | 0.92  | 4.23 | 0.056 |
| 80. | LP | ( 1) | Pt | 1 | 741. | RY  | (22) | C | 22      | 0.06  | 4.91 | 0.015 |
| 80. | LP | ( 1) | Pt | 1 | 742. | RY  | (23) | C | 22      | 0.05  | 4.61 | 0.014 |
| 80. | LP | ( 1) | Pt | 1 | 743. | RY  | (24) | C | 22      | 0.12  | 4.45 | 0.021 |
| 80. | LP | ( 1) | Pt | 1 | 748. | RY  | ( 3) | C | 23      | 0.13  | 1.39 | 0.012 |
| 80. | LP | ( 1) | Pt | 1 | 749. | RY  | ( 4) | C | 23      | 0.60  | 1.87 | 0.030 |
| 80. | LP | ( 1) | Pt | 1 | 753. | RY  | ( 8) | C | 23      | 0.33  | 2.97 | 0.028 |
| 80. | LP | ( 1) | Pt | 1 | 754. | RY  | ( 9) | C | 23      | 0.07  | 3.79 | 0.014 |
| 80. | LP | ( 1) | Pt | 1 | 755. | RY  | (10) | C | 23      | 0.24  | 2.62 | 0.022 |
| 80. | LP | ( 1) | Pt | 1 | 756. | RY  | (11) | C | 23      | 0.30  | 2.83 | 0.026 |
| 80. | LP | ( 1) | Pt | 1 | 757. | RY  | (12) | C | 23      | 0.16  | 3.05 | 0.020 |
| 80. | LP | ( 1) | Pt | 1 | 758. | RY  | (13) | C | 23      | 0.25  | 3.52 | 0.026 |
| 80. | LP | ( 1) | Pt | 1 | 759. | RY  | (14) | C | 23      | 0.29  | 2.72 | 0.025 |
| 80. | LP | ( 1) | Pt | 1 | 761. | RY  | (16) | C | 23      | 0.06  | 3.65 | 0.013 |
| 80. | LP | ( 1) | Pt | 1 | 762. | RY  | (17) | C | 23      | 0.22  | 2.53 | 0.021 |
| 80. | LP | ( 1) | Pt | 1 | 773. | RY  | ( 2) | H | 24      | 0.22  | 1.98 | 0.019 |
| 80. | LP | ( 1) | Pt | 1 | 780. | RY  | ( 4) | C | 25      | 0.18  | 1.79 | 0.016 |
| 80. | LP | ( 1) | Pt | 1 | 783. | RY  | ( 7) | C | 25      | 0.19  | 3.58 | 0.023 |
| 80. | LP | ( 1) | Pt | 1 | 786. | RY  | (10) | C | 25      | 0.80  | 2.68 | 0.041 |
| 80. | LP | ( 1) | Pt | 1 | 787. | RY  | (11) | C | 25      | 0.16  | 2.54 | 0.018 |
| 80. | LP | ( 1) | Pt | 1 | 790. | RY  | (14) | C | 25      | 0.08  | 2.72 | 0.013 |
| 80. | LP | ( 1) | Pt | 1 | 808. | RY  | ( 1) | C | 27      | 8.76  | 2.28 | 0.126 |
| 80. | LP | ( 1) | Pt | 1 | 809. | RY  | ( 2) | C | 27      | 0.19  | 1.44 | 0.015 |
| 80. | LP | ( 1) | Pt | 1 | 810. | RY  | ( 3) | C | 27      | 1.90  | 1.81 | 0.052 |
| 80. | LP | ( 1) | Pt | 1 | 811. | RY  | ( 4) | C | 27      | 8.64  | 2.05 | 0.119 |
| 80. | LP | ( 1) | Pt | 1 | 812. | RY  | ( 5) | C | 27      | 0.30  | 2.52 | 0.025 |
| 80. | LP | ( 1) | Pt | 1 | 813. | RY  | ( 6) | C | 27      | 4.38  | 2.41 | 0.092 |
| 80. | LP | ( 1) | Pt | 1 | 814. | RY  | ( 7) | C | 27      | 0.14  | 2.60 | 0.017 |
| 80. | LP | ( 1) | Pt | 1 | 815. | RY  | ( 8) | C | 27      | 6.43  | 3.48 | 0.133 |
| 80. | LP | ( 1) | Pt | 1 | 816. | RY  | ( 9) | C | 27      | 2.80  | 2.90 | 0.080 |
| 80. | LP | ( 1) | Pt | 1 | 817. | RY  | (10) | C | 27      | 1.72  | 2.80 | 0.062 |
| 80. | LP | ( 1) | Pt | 1 | 818. | RY  | (11) | C | 27      | 1.19  | 2.82 | 0.052 |
| 80. | LP | ( 1) | Pt | 1 | 819. | RY  | (12) | C | 27      | 0.47  | 3.60 | 0.037 |
| 80. | LP | ( 1) | Pt | 1 | 820. | RY  | (13) | C | 27      | 0.10  | 2.90 | 0.015 |
| 80. | LP | ( 1) | Pt | 1 | 821. | RY  | (14) | C | 27      | 0.09  | 3.49 | 0.016 |
| 80. | LP | ( 1) | Pt | 1 | 822. | RY  | (15) | C | 27      | 0.05  | 3.03 | 0.011 |
| 80. | LP | ( 1) | Pt | 1 | 823. | RY  | (16) | C | 27      | 2.55  | 2.96 | 0.078 |
| 80. | LP | ( 1) | Pt | 1 | 824. | RY  | (17) | C | 27      | 0.29  | 4.03 | 0.030 |
| 80. | LP | ( 1) | Pt | 1 | 825. | RY  | (18) | C | 27      | 0.20  | 3.82 | 0.025 |
| 80. | LP | ( 1) | Pt | 1 | 834. | RY  | ( 1) | H | 28      | 15.45 | 2.00 | 0.157 |
| 80. | LP | ( 1) | Pt | 1 | 835. | RY  | ( 2) | H | 28      | 1.29  | 2.71 | 0.053 |
| 80. | LP | ( 1) | Pt | 1 | 837. | RY  | ( 4) | H | 28      | 0.21  | 3.02 | 0.022 |
| 80. | LP | ( 1) | Pt | 1 | 838. | RY  | ( 5) | H | 28      | 1.03  | 3.69 | 0.055 |
| 81. | LP | ( 2) | Pt | 1 | 181. | LV  | ( 1) | C | 17      | 0.08  | 0.32 | 0.005 |
| 81. | LP | ( 2) | Pt | 1 | 196. | BD* | ( 2) | N | 7- C 10 | 0.38  | 0.38 | 0.011 |
| 81. | LP | ( 2) | Pt | 1 | 200. | BD* | ( 2) | N | 8- C 27 | 0.63  | 0.40 | 0.014 |
| 81. | LP | ( 2) | Pt | 1 | 414. | RY  | ( 1) | N | 7       | 0.07  | 4.87 | 0.016 |
| 81. | LP | ( 2) | Pt | 1 | 415. | RY  | ( 2) | N | 7       | 2.79  | 1.41 | 0.056 |
| 81. | LP | ( 2) | Pt | 1 | 416. | RY  | ( 3) | N | 7       | 0.16  | 1.91 | 0.015 |
| 81. | LP | ( 2) | Pt | 1 | 426. | RY  | (13) | N | 7       | 0.06  | 4.44 | 0.014 |
| 81. | LP | ( 2) | Pt | 1 | 440. | RY  | ( 1) | N | 8       | 0.55  | 4.81 | 0.046 |
| 81. | LP | ( 2) | Pt | 1 | 441. | RY  | ( 2) | N | 8       | 2.72  | 1.54 | 0.058 |
| 81. | LP | ( 2) | Pt | 1 | 442. | RY  | ( 3) | N | 8       | 0.08  | 1.89 | 0.011 |
| 81. | LP | ( 2) | Pt | 1 | 445. | RY  | ( 6) | N | 8       | 0.07  | 2.51 | 0.012 |
| 81. | LP | ( 2) | Pt | 1 | 611. | RY  | ( 1) | C | 17      | 0.08  | 2.69 | 0.013 |
| 81. | LP | ( 2) | Pt | 1 | 613. | RY  | ( 3) | C | 17      | 0.23  | 1.63 | 0.017 |
| 81. | LP | ( 2) | Pt | 1 | 723. | RY  | ( 4) | C | 22      | 0.14  | 2.89 | 0.018 |
| 81. | LP | ( 2) | Pt | 1 | 815. | RY  | ( 8) | C | 27      | 0.05  | 3.54 | 0.012 |
| 81. | LP | ( 2) | Pt | 1 | 820. | RY  | (13) | C | 27      | 0.05  | 2.96 | 0.011 |
| 81. | LP | ( 2) | Pt | 1 | 834. | RY  | ( 1) | H | 28      | 0.07  | 2.06 | 0.010 |
| 82. | LP | ( 3) | Pt | 1 | 195. | BD* | ( 1) | N | 7- C 10 | 0.48  | 0.84 | 0.018 |
| 82. | LP | ( 3) | Pt | 1 | 197. | BD* | ( 1) | N | 7- C 17 | 0.39  | 0.82 | 0.016 |
| 82. | LP | ( 3) | Pt | 1 | 198. | BD* | ( 1) | N | 8- C 22 | 0.44  | 0.75 | 0.016 |
| 82. | LP | ( 3) | Pt | 1 | 199. | BD* | ( 1) | N | 8- C 27 | 0.50  | 0.89 | 0.019 |
| 82. | LP | ( 3) | Pt | 1 | 414. | RY  | ( 1) | N | 7       | 3.14  | 4.90 | 0.111 |
| 82. | LP | ( 3) | Pt | 1 | 415. | RY  | ( 2) | N | 7       | 0.21  | 1.43 | 0.016 |
| 82. | LP | ( 3) | Pt | 1 | 416. | RY  | ( 3) | N | 7       | 3.49  | 1.94 | 0.073 |
| 82. | LP | ( 3) | Pt | 1 | 417. | RY  | ( 4) | N | 7       | 0.50  | 2.71 | 0.033 |
| 82. | LP | ( 3) | Pt | 1 | 424. | RY  | (11) | N | 7       | 0.08  | 5.11 | 0.018 |
| 82. | LP | ( 3) | Pt | 1 | 425. | RY  | (12) | N | 7       | 0.08  | 3.87 | 0.016 |
| 82. | LP | ( 3) | Pt | 1 | 426. | RY  | (13) | N | 7       | 0.12  | 4.47 | 0.020 |
| 82. | LP | ( 3) | Pt | 1 | 427. | RY  | (14) | N | 7       | 0.11  | 4.44 | 0.019 |
| 82. | LP | ( 3) | Pt | 1 | 428. | RY  | (15) | N | 7       | 0.16  | 4.87 | 0.025 |
| 82. | LP | ( 3) | Pt | 1 | 439. | RY  | (26) | N | 7       | 0.10  | 5.30 | 0.020 |
| 82. | LP | ( 3) | Pt | 1 | 440. | RY  | ( 1) | N | 8       | 2.91  | 4.84 | 0.106 |
| 82. | LP | ( 3) | Pt | 1 | 441. | RY  | ( 2) | N | 8       | 0.18  | 1.57 | 0.015 |
| 82. | LP | ( 3) | Pt | 1 | 442. | RY  | ( 3) | N | 8       | 4.49  | 1.92 | 0.083 |
| 82. | LP | ( 3) | Pt | 1 | 443. | RY  | ( 4) | N | 8       | 0.73  | 2.80 | 0.040 |
| 82. | LP | ( 3) | Pt | 1 | 451. | RY  | (12) | N | 8       | 0.31  | 4.06 | 0.032 |
| 82. | LP | ( 3) | Pt | 1 | 452. | RY  | (13) | N | 8       | 0.33  | 3.97 | 0.032 |
| 82. | LP | ( 3) | Pt | 1 | 464. | RY  | (25) | N | 8       | 0.10  | 5.36 | 0.021 |
| 82. | LP | ( 3) | Pt | 1 | 492. | RY  | ( 1) | C | 10      | 0.56  | 2.12 | 0.031 |
| 82. | LP | ( 3) | Pt | 1 | 493. | RY  | ( 2) | C | 10      | 0.09  | 1.59 | 0.011 |
| 82. | LP | ( 3) | Pt | 1 | 494. | RY  | ( 3) | C | 10      | 0.53  | 1.92 | 0.029 |
| 82. | LP | ( 3) | Pt | 1 | 495. | RY  | ( 4) | C | 10      | 0.84  | 1.96 | 0.036 |
| 82. | LP | ( 3) | Pt | 1 | 497. | RY  | ( 6) | C | 10      | 0.06  | 3.72 | 0.013 |
| 82. | LP | ( 3) | Pt | 1 | 499. | RY  | ( 8) | C | 10      | 0.21  | 3.16 | 0.023 |
| 82. | LP | ( 3) | Pt | 1 | 504. | RY  | (13) | C | 10      | 0.35  | 3.11 | 0.030 |

|                 |                         |      |      |       |
|-----------------|-------------------------|------|------|-------|
| 82. LP ( 3)Pt 1 | 507. RY (16) C 10       | 0.06 | 3.59 | 0.013 |
| 82. LP ( 3)Pt 1 | 518. RY ( 1) H 11       | 0.50 | 1.80 | 0.027 |
| 82. LP ( 3)Pt 1 | 519. RY ( 2) H 11       | 0.06 | 2.69 | 0.011 |
| 82. LP ( 3)Pt 1 | 611. RY ( 1) C 17       | 0.55 | 2.72 | 0.034 |
| 82. LP ( 3)Pt 1 | 612. RY ( 2) C 17       | 0.17 | 2.01 | 0.016 |
| 82. LP ( 3)Pt 1 | 613. RY ( 3) C 17       | 0.20 | 1.66 | 0.016 |
| 82. LP ( 3)Pt 1 | 614. RY ( 4) C 17       | 0.69 | 3.02 | 0.041 |
| 82. LP ( 3)Pt 1 | 615. RY ( 5) C 17       | 0.50 | 3.40 | 0.037 |
| 82. LP ( 3)Pt 1 | 616. RY ( 6) C 17       | 0.65 | 2.79 | 0.038 |
| 82. LP ( 3)Pt 1 | 619. RY ( 9) C 17       | 0.17 | 3.30 | 0.021 |
| 82. LP ( 3)Pt 1 | 622. RY (12) C 17       | 0.46 | 3.68 | 0.037 |
| 82. LP ( 3)Pt 1 | 623. RY (13) C 17       | 0.06 | 3.40 | 0.013 |
| 82. LP ( 3)Pt 1 | 625. RY (15) C 17       | 0.16 | 4.45 | 0.024 |
| 82. LP ( 3)Pt 1 | 628. RY (18) C 17       | 0.06 | 2.96 | 0.012 |
| 82. LP ( 3)Pt 1 | 699. RY ( 6) C 21       | 0.07 | 4.06 | 0.015 |
| 82. LP ( 3)Pt 1 | 720. RY ( 1) C 22       | 0.42 | 2.56 | 0.029 |
| 82. LP ( 3)Pt 1 | 721. RY ( 2) C 22       | 0.44 | 2.12 | 0.027 |
| 82. LP ( 3)Pt 1 | 722. RY ( 3) C 22       | 0.32 | 1.79 | 0.021 |
| 82. LP ( 3)Pt 1 | 723. RY ( 4) C 22       | 0.73 | 2.91 | 0.041 |
| 82. LP ( 3)Pt 1 | 724. RY ( 5) C 22       | 0.32 | 2.90 | 0.027 |
| 82. LP ( 3)Pt 1 | 726. RY ( 7) C 22       | 0.42 | 2.82 | 0.031 |
| 82. LP ( 3)Pt 1 | 730. RY (11) C 22       | 0.64 | 3.96 | 0.045 |
| 82. LP ( 3)Pt 1 | 731. RY (12) C 22       | 0.24 | 3.64 | 0.027 |
| 82. LP ( 3)Pt 1 | 732. RY (13) C 22       | 0.21 | 3.46 | 0.024 |
| 82. LP ( 3)Pt 1 | 734. RY (15) C 22       | 0.10 | 4.79 | 0.019 |
| 82. LP ( 3)Pt 1 | 735. RY (16) C 22       | 0.06 | 4.40 | 0.015 |
| 82. LP ( 3)Pt 1 | 808. RY ( 1) C 27       | 0.84 | 2.36 | 0.040 |
| 82. LP ( 3)Pt 1 | 810. RY ( 3) C 27       | 0.52 | 1.90 | 0.028 |
| 82. LP ( 3)Pt 1 | 811. RY ( 4) C 27       | 0.89 | 2.14 | 0.039 |
| 82. LP ( 3)Pt 1 | 813. RY ( 6) C 27       | 0.09 | 2.50 | 0.013 |
| 82. LP ( 3)Pt 1 | 815. RY ( 8) C 27       | 0.19 | 3.56 | 0.023 |
| 82. LP ( 3)Pt 1 | 816. RY ( 9) C 27       | 0.28 | 2.98 | 0.026 |
| 82. LP ( 3)Pt 1 | 817. RY (10) C 27       | 0.10 | 2.89 | 0.015 |
| 82. LP ( 3)Pt 1 | 818. RY (11) C 27       | 0.10 | 2.91 | 0.016 |
| 82. LP ( 3)Pt 1 | 823. RY (16) C 27       | 0.15 | 3.04 | 0.019 |
| 82. LP ( 3)Pt 1 | 834. RY ( 1) H 28       | 1.10 | 2.09 | 0.043 |
| 82. LP ( 3)Pt 1 | 835. RY ( 2) H 28       | 0.09 | 2.79 | 0.014 |
| 83. LP ( 4)Pt 1 | 195. BD* ( 1) N 7- C 10 | 0.11 | 0.82 | 0.008 |
| 83. LP ( 4)Pt 1 | 196. BD* ( 2) N 7- C 10 | 0.77 | 0.38 | 0.015 |
| 83. LP ( 4)Pt 1 | 197. BD* ( 1) N 7- C 17 | 0.11 | 0.79 | 0.008 |
| 83. LP ( 4)Pt 1 | 198. BD* ( 1) N 8- C 22 | 0.11 | 0.73 | 0.008 |
| 83. LP ( 4)Pt 1 | 199. BD* ( 1) N 8- C 27 | 0.09 | 0.87 | 0.008 |
| 83. LP ( 4)Pt 1 | 200. BD* ( 2) N 8- C 27 | 0.48 | 0.40 | 0.012 |
| 83. LP ( 4)Pt 1 | 414. RY ( 1) N 7        | 3.03 | 4.88 | 0.109 |
| 83. LP ( 4)Pt 1 | 415. RY ( 2) N 7        | 2.04 | 1.41 | 0.048 |
| 83. LP ( 4)Pt 1 | 416. RY ( 3) N 7        | 1.32 | 1.92 | 0.045 |
| 83. LP ( 4)Pt 1 | 417. RY ( 4) N 7        | 0.11 | 2.69 | 0.016 |
| 83. LP ( 4)Pt 1 | 422. RY ( 9) N 7        | 0.07 | 4.67 | 0.016 |
| 83. LP ( 4)Pt 1 | 424. RY (11) N 7        | 0.15 | 5.09 | 0.025 |
| 83. LP ( 4)Pt 1 | 427. RY (14) N 7        | 0.21 | 4.42 | 0.027 |
| 83. LP ( 4)Pt 1 | 428. RY (15) N 7        | 0.14 | 4.85 | 0.024 |
| 83. LP ( 4)Pt 1 | 440. RY ( 1) N 8        | 3.29 | 4.81 | 0.112 |
| 83. LP ( 4)Pt 1 | 441. RY ( 2) N 8        | 0.47 | 1.55 | 0.024 |
| 83. LP ( 4)Pt 1 | 442. RY ( 3) N 8        | 1.15 | 1.90 | 0.042 |
| 83. LP ( 4)Pt 1 | 443. RY ( 4) N 8        | 0.13 | 2.78 | 0.017 |
| 83. LP ( 4)Pt 1 | 451. RY (12) N 8        | 0.29 | 4.04 | 0.031 |
| 83. LP ( 4)Pt 1 | 452. RY (13) N 8        | 0.29 | 3.95 | 0.030 |
| 83. LP ( 4)Pt 1 | 454. RY (15) N 8        | 0.06 | 4.70 | 0.015 |
| 83. LP ( 4)Pt 1 | 464. RY (25) N 8        | 0.06 | 5.34 | 0.016 |
| 83. LP ( 4)Pt 1 | 492. RY ( 1) C 10       | 0.14 | 2.10 | 0.016 |
| 83. LP ( 4)Pt 1 | 493. RY ( 2) C 10       | 0.13 | 1.56 | 0.013 |
| 83. LP ( 4)Pt 1 | 495. RY ( 4) C 10       | 0.36 | 1.94 | 0.024 |
| 83. LP ( 4)Pt 1 | 497. RY ( 6) C 10       | 0.07 | 3.70 | 0.014 |
| 83. LP ( 4)Pt 1 | 499. RY ( 8) C 10       | 0.52 | 3.14 | 0.036 |
| 83. LP ( 4)Pt 1 | 501. RY (10) C 10       | 0.06 | 2.57 | 0.011 |
| 83. LP ( 4)Pt 1 | 504. RY (13) C 10       | 0.23 | 3.09 | 0.024 |
| 83. LP ( 4)Pt 1 | 518. RY ( 1) H 11       | 0.20 | 1.78 | 0.017 |
| 83. LP ( 4)Pt 1 | 611. RY ( 1) C 17       | 0.89 | 2.70 | 0.044 |
| 83. LP ( 4)Pt 1 | 613. RY ( 3) C 17       | 0.43 | 1.63 | 0.024 |
| 83. LP ( 4)Pt 1 | 614. RY ( 4) C 17       | 0.94 | 3.00 | 0.047 |
| 83. LP ( 4)Pt 1 | 615. RY ( 5) C 17       | 0.11 | 3.38 | 0.017 |
| 83. LP ( 4)Pt 1 | 616. RY ( 6) C 17       | 0.21 | 2.77 | 0.021 |
| 83. LP ( 4)Pt 1 | 620. RY (10) C 17       | 0.07 | 3.23 | 0.014 |
| 83. LP ( 4)Pt 1 | 622. RY (12) C 17       | 0.28 | 3.66 | 0.029 |
| 83. LP ( 4)Pt 1 | 625. RY (15) C 17       | 0.13 | 4.43 | 0.022 |
| 83. LP ( 4)Pt 1 | 628. RY (18) C 17       | 0.06 | 2.93 | 0.012 |
| 83. LP ( 4)Pt 1 | 704. RY (11) C 21       | 0.08 | 2.92 | 0.014 |
| 83. LP ( 4)Pt 1 | 720. RY ( 1) C 22       | 0.84 | 2.54 | 0.041 |
| 83. LP ( 4)Pt 1 | 721. RY ( 2) C 22       | 0.16 | 2.10 | 0.016 |
| 83. LP ( 4)Pt 1 | 722. RY ( 3) C 22       | 0.79 | 1.77 | 0.033 |
| 83. LP ( 4)Pt 1 | 723. RY ( 4) C 22       | 0.70 | 2.89 | 0.040 |
| 83. LP ( 4)Pt 1 | 724. RY ( 5) C 22       | 0.07 | 2.88 | 0.013 |
| 83. LP ( 4)Pt 1 | 726. RY ( 7) C 22       | 0.11 | 2.79 | 0.015 |
| 83. LP ( 4)Pt 1 | 730. RY (11) C 22       | 0.30 | 3.94 | 0.031 |
| 83. LP ( 4)Pt 1 | 731. RY (12) C 22       | 0.17 | 3.61 | 0.022 |
| 83. LP ( 4)Pt 1 | 734. RY (15) C 22       | 0.10 | 4.76 | 0.020 |
| 83. LP ( 4)Pt 1 | 808. RY ( 1) C 27       | 0.25 | 2.34 | 0.022 |
| 83. LP ( 4)Pt 1 | 809. RY ( 2) C 27       | 0.10 | 1.51 | 0.011 |
| 83. LP ( 4)Pt 1 | 811. RY ( 4) C 27       | 0.39 | 2.12 | 0.026 |
| 83. LP ( 4)Pt 1 | 813. RY ( 6) C 27       | 0.17 | 2.48 | 0.019 |
| 83. LP ( 4)Pt 1 | 815. RY ( 8) C 27       | 0.44 | 3.54 | 0.035 |
| 83. LP ( 4)Pt 1 | 816. RY ( 9) C 27       | 0.13 | 2.96 | 0.018 |
| 83. LP ( 4)Pt 1 | 817. RY (10) C 27       | 0.07 | 2.86 | 0.013 |
| 83. LP ( 4)Pt 1 | 818. RY (11) C 27       | 0.07 | 2.88 | 0.012 |
| 83. LP ( 4)Pt 1 | 823. RY (16) C 27       | 0.08 | 3.02 | 0.014 |
| 83. LP ( 4)Pt 1 | 834. RY ( 1) H 28       | 0.60 | 2.07 | 0.031 |
| 83. LP ( 4)Pt 1 | 835. RY ( 2) H 28       | 0.06 | 2.77 | 0.011 |
| 83. LP ( 4)Pt 1 | 838. RY ( 5) H 28       | 0.05 | 3.76 | 0.013 |
| 84. LP ( 1) S 2 | 414. RY ( 1) N 7        | 0.56 | 4.91 | 0.047 |
| 84. LP ( 1) S 2 | 415. RY ( 2) N 7        | 0.11 | 1.45 | 0.011 |
| 84. LP ( 1) S 2 | 424. RY (11) N 7        | 0.05 | 5.13 | 0.015 |
| 84. LP ( 1) S 2 | 426. RY (13) N 7        | 0.07 | 4.48 | 0.015 |
| 84. LP ( 1) S 2 | 428. RY (15) N 7        | 0.06 | 4.89 | 0.015 |

|                 |                          |      |      |       |
|-----------------|--------------------------|------|------|-------|
| 84. LP ( 1) S 2 | 440. RY ( 1) N 8         | 0.25 | 4.85 | 0.031 |
| 84. LP ( 1) S 2 | 441. RY ( 2) N 8         | 0.05 | 1.59 | 0.008 |
| 84. LP ( 1) S 2 | 443. RY ( 4) N 8         | 0.13 | 2.81 | 0.017 |
| 84. LP ( 1) S 2 | 452. RY (13) N 8         | 0.07 | 3.99 | 0.015 |
| 84. LP ( 1) S 2 | 495. RY ( 4) C 10        | 0.12 | 1.98 | 0.014 |
| 84. LP ( 1) S 2 | 499. RY ( 8) C 10        | 0.24 | 3.17 | 0.024 |
| 84. LP ( 1) S 2 | 504. RY (13) C 10        | 0.08 | 3.13 | 0.015 |
| 84. LP ( 1) S 2 | 518. RY ( 1) H 11        | 0.15 | 1.82 | 0.015 |
| 84. LP ( 1) S 2 | 611. RY ( 1) C 17        | 0.23 | 2.73 | 0.022 |
| 84. LP ( 1) S 2 | 614. RY ( 4) C 17        | 0.21 | 3.04 | 0.022 |
| 84. LP ( 1) S 2 | 615. RY ( 5) C 17        | 0.06 | 3.42 | 0.013 |
| 84. LP ( 1) S 2 | 616. RY ( 6) C 17        | 0.11 | 2.81 | 0.016 |
| 84. LP ( 1) S 2 | 622. RY (12) C 17        | 0.07 | 3.70 | 0.014 |
| 84. LP ( 1) S 2 | 720. RY ( 1) C 22        | 0.12 | 2.57 | 0.016 |
| 84. LP ( 1) S 2 | 722. RY ( 3) C 22        | 0.10 | 1.80 | 0.012 |
| 84. LP ( 1) S 2 | 723. RY ( 4) C 22        | 0.28 | 2.93 | 0.025 |
| 84. LP ( 1) S 2 | 724. RY ( 5) C 22        | 0.06 | 2.92 | 0.012 |
| 84. LP ( 1) S 2 | 726. RY ( 7) C 22        | 0.08 | 2.83 | 0.013 |
| 84. LP ( 1) S 2 | 730. RY (11) C 22        | 0.13 | 3.97 | 0.021 |
| 84. LP ( 1) S 2 | 808. RY ( 1) C 27        | 0.09 | 2.38 | 0.013 |
| 84. LP ( 1) S 2 | 811. RY ( 4) C 27        | 0.10 | 2.15 | 0.013 |
| 84. LP ( 1) S 2 | 815. RY ( 8) C 27        | 0.07 | 3.58 | 0.014 |
| 84. LP ( 1) S 2 | 834. RY ( 1) H 28        | 0.19 | 2.11 | 0.018 |
| 85. LP ( 1) S 3 | 223. BD* ( 1) C 25- C 27 | 0.07 | 0.88 | 0.007 |
| 85. LP ( 1) S 3 | 224. BD* ( 1) C 27- H 28 | 0.07 | 1.11 | 0.008 |
| 85. LP ( 1) S 3 | 417. RY ( 4) N 7         | 0.05 | 2.72 | 0.011 |
| 85. LP ( 1) S 3 | 440. RY ( 1) N 8         | 0.18 | 4.85 | 0.026 |
| 85. LP ( 1) S 3 | 441. RY ( 2) N 8         | 0.05 | 1.58 | 0.008 |
| 85. LP ( 1) S 3 | 452. RY (13) N 8         | 0.06 | 3.98 | 0.013 |
| 85. LP ( 1) S 3 | 614. RY ( 4) C 17        | 0.10 | 3.04 | 0.015 |
| 85. LP ( 1) S 3 | 720. RY ( 1) C 22        | 0.07 | 2.57 | 0.012 |
| 85. LP ( 1) S 3 | 723. RY ( 4) C 22        | 0.06 | 2.92 | 0.012 |
| 85. LP ( 1) S 3 | 811. RY ( 4) C 27        | 0.06 | 2.15 | 0.010 |
| 85. LP ( 1) S 3 | 813. RY ( 6) C 27        | 0.05 | 2.51 | 0.010 |
| 85. LP ( 1) S 3 | 815. RY ( 8) C 27        | 0.14 | 3.57 | 0.020 |
| 85. LP ( 1) S 3 | 817. RY (10) C 27        | 0.08 | 2.90 | 0.013 |
| 85. LP ( 1) S 3 | 834. RY ( 1) H 28        | 0.19 | 2.10 | 0.018 |
| 86. LP ( 1) S 4 | 414. RY ( 1) N 7         | 0.23 | 4.96 | 0.030 |
| 86. LP ( 1) S 4 | 440. RY ( 1) N 8         | 0.21 | 4.89 | 0.029 |
| 86. LP ( 1) S 4 | 499. RY ( 8) C 10        | 0.06 | 3.21 | 0.012 |
| 86. LP ( 1) S 4 | 611. RY ( 1) C 17        | 0.09 | 2.77 | 0.014 |
| 86. LP ( 1) S 4 | 614. RY ( 4) C 17        | 0.11 | 3.08 | 0.016 |
| 86. LP ( 1) S 4 | 720. RY ( 1) C 22        | 0.07 | 2.61 | 0.012 |
| 86. LP ( 1) S 4 | 722. RY ( 3) C 22        | 0.05 | 1.84 | 0.009 |
| 86. LP ( 1) S 4 | 723. RY ( 4) C 22        | 0.11 | 2.97 | 0.016 |
| 86. LP ( 1) S 4 | 730. RY (11) C 22        | 0.06 | 4.01 | 0.013 |
| 86. LP ( 1) S 4 | 808. RY ( 1) C 27        | 0.06 | 2.42 | 0.010 |
| 86. LP ( 1) S 4 | 811. RY ( 4) C 27        | 0.06 | 2.20 | 0.010 |
| 86. LP ( 1) S 4 | 834. RY ( 1) H 28        | 0.09 | 2.15 | 0.012 |
| 87. LP ( 2) S 4 | 196. BD* ( 2) N 7- C 10  | 0.10 | 0.18 | 0.004 |
| 87. LP ( 2) S 4 | 197. BD* ( 1) N 7- C 17  | 0.08 | 0.59 | 0.006 |
| 87. LP ( 2) S 4 | 200. BD* ( 2) N 8- C 27  | 0.14 | 0.19 | 0.005 |
| 87. LP ( 2) S 4 | 414. RY ( 1) N 7         | 4.11 | 4.67 | 0.124 |
| 87. LP ( 2) S 4 | 415. RY ( 2) N 7         | 0.47 | 1.20 | 0.021 |
| 87. LP ( 2) S 4 | 416. RY ( 3) N 7         | 0.41 | 1.71 | 0.024 |
| 87. LP ( 2) S 4 | 417. RY ( 4) N 7         | 0.57 | 2.48 | 0.034 |
| 87. LP ( 2) S 4 | 422. RY ( 9) N 7         | 0.20 | 4.46 | 0.027 |
| 87. LP ( 2) S 4 | 423. RY (10) N 7         | 0.07 | 3.69 | 0.014 |
| 87. LP ( 2) S 4 | 424. RY (11) N 7         | 0.23 | 4.88 | 0.030 |
| 87. LP ( 2) S 4 | 426. RY (13) N 7         | 0.42 | 4.24 | 0.038 |
| 87. LP ( 2) S 4 | 427. RY (14) N 7         | 0.18 | 4.22 | 0.025 |
| 87. LP ( 2) S 4 | 428. RY (15) N 7         | 0.32 | 4.64 | 0.034 |
| 87. LP ( 2) S 4 | 439. RY (26) N 7         | 0.09 | 5.08 | 0.019 |
| 87. LP ( 2) S 4 | 440. RY ( 1) N 8         | 4.10 | 4.61 | 0.123 |
| 87. LP ( 2) S 4 | 441. RY ( 2) N 8         | 0.96 | 1.34 | 0.032 |
| 87. LP ( 2) S 4 | 442. RY ( 3) N 8         | 0.19 | 1.69 | 0.016 |
| 87. LP ( 2) S 4 | 443. RY ( 4) N 8         | 0.62 | 2.57 | 0.036 |
| 87. LP ( 2) S 4 | 448. RY ( 9) N 8         | 0.11 | 4.50 | 0.020 |
| 87. LP ( 2) S 4 | 450. RY (11) N 8         | 0.05 | 4.69 | 0.014 |
| 87. LP ( 2) S 4 | 451. RY (12) N 8         | 0.62 | 3.83 | 0.044 |
| 87. LP ( 2) S 4 | 452. RY (13) N 8         | 0.82 | 3.74 | 0.049 |
| 87. LP ( 2) S 4 | 453. RY (14) N 8         | 0.13 | 4.63 | 0.022 |
| 87. LP ( 2) S 4 | 464. RY (25) N 8         | 0.12 | 5.13 | 0.022 |
| 87. LP ( 2) S 4 | 492. RY ( 1) C 10        | 0.64 | 1.90 | 0.031 |
| 87. LP ( 2) S 4 | 493. RY ( 2) C 10        | 0.08 | 1.36 | 0.009 |
| 87. LP ( 2) S 4 | 494. RY ( 3) C 10        | 0.20 | 1.70 | 0.017 |
| 87. LP ( 2) S 4 | 495. RY ( 4) C 10        | 0.95 | 1.74 | 0.036 |
| 87. LP ( 2) S 4 | 497. RY ( 6) C 10        | 0.10 | 3.49 | 0.017 |
| 87. LP ( 2) S 4 | 498. RY ( 7) C 10        | 0.09 | 1.75 | 0.011 |
| 87. LP ( 2) S 4 | 499. RY ( 8) C 10        | 0.89 | 2.93 | 0.046 |
| 87. LP ( 2) S 4 | 501. RY (10) C 10        | 0.10 | 2.37 | 0.014 |
| 87. LP ( 2) S 4 | 502. RY (11) C 10        | 0.07 | 3.96 | 0.015 |
| 87. LP ( 2) S 4 | 504. RY (13) C 10        | 0.48 | 2.88 | 0.033 |
| 87. LP ( 2) S 4 | 507. RY (16) C 10        | 0.06 | 3.36 | 0.013 |
| 87. LP ( 2) S 4 | 508. RY (17) C 10        | 0.09 | 3.31 | 0.016 |
| 87. LP ( 2) S 4 | 518. RY ( 1) H 11        | 0.66 | 1.57 | 0.029 |
| 87. LP ( 2) S 4 | 519. RY ( 2) H 11        | 0.08 | 2.46 | 0.012 |
| 87. LP ( 2) S 4 | 522. RY ( 5) H 11        | 0.07 | 3.46 | 0.014 |
| 87. LP ( 2) S 4 | 564. RY (11) C 14        | 0.09 | 2.73 | 0.014 |
| 87. LP ( 2) S 4 | 586. RY ( 2) C 16        | 0.06 | 1.95 | 0.009 |
| 87. LP ( 2) S 4 | 596. RY (12) C 16        | 0.08 | 2.66 | 0.013 |
| 87. LP ( 2) S 4 | 611. RY ( 1) C 17        | 1.53 | 2.49 | 0.055 |
| 87. LP ( 2) S 4 | 612. RY ( 2) C 17        | 0.16 | 1.78 | 0.015 |
| 87. LP ( 2) S 4 | 613. RY ( 3) C 17        | 0.45 | 1.43 | 0.023 |
| 87. LP ( 2) S 4 | 614. RY ( 4) C 17        | 1.89 | 2.80 | 0.065 |
| 87. LP ( 2) S 4 | 615. RY ( 5) C 17        | 0.42 | 3.18 | 0.032 |
| 87. LP ( 2) S 4 | 616. RY ( 6) C 17        | 0.76 | 2.56 | 0.039 |
| 87. LP ( 2) S 4 | 617. RY ( 7) C 17        | 0.08 | 2.79 | 0.013 |
| 87. LP ( 2) S 4 | 619. RY ( 9) C 17        | 0.08 | 3.07 | 0.014 |
| 87. LP ( 2) S 4 | 620. RY (10) C 17        | 0.10 | 3.02 | 0.015 |
| 87. LP ( 2) S 4 | 622. RY (12) C 17        | 0.61 | 3.45 | 0.041 |
| 87. LP ( 2) S 4 | 625. RY (15) C 17        | 0.25 | 4.22 | 0.029 |
| 87. LP ( 2) S 4 | 628. RY (18) C 17        | 0.22 | 2.73 | 0.022 |

|      |    |       |    |        |      |     |       |   |          |      |      |       |
|------|----|-------|----|--------|------|-----|-------|---|----------|------|------|-------|
| 87.  | LP | ( 2 ) | S  | 4      | 631. | RY  | (21)  | C | 17       | 0.07 | 3.68 | 0.014 |
| 87.  | LP | ( 2 ) | S  | 4      | 695. | RY  | ( 2 ) | C | 21       | 0.05 | 1.84 | 0.009 |
| 87.  | LP | ( 2 ) | S  | 4      | 699. | RY  | ( 6 ) | C | 21       | 0.05 | 3.83 | 0.012 |
| 87.  | LP | ( 2 ) | S  | 4      | 704. | RY  | (11)  | C | 21       | 0.16 | 2.72 | 0.018 |
| 87.  | LP | ( 2 ) | S  | 4      | 720. | RY  | ( 1 ) | C | 22       | 1.26 | 2.33 | 0.048 |
| 87.  | LP | ( 2 ) | S  | 4      | 721. | RY  | ( 2 ) | C | 22       | 0.51 | 1.89 | 0.028 |
| 87.  | LP | ( 2 ) | S  | 4      | 722. | RY  | ( 3 ) | C | 22       | 0.79 | 1.56 | 0.031 |
| 87.  | LP | ( 2 ) | S  | 4      | 723. | RY  | ( 4 ) | C | 22       | 1.85 | 2.68 | 0.063 |
| 87.  | LP | ( 2 ) | S  | 4      | 724. | RY  | ( 5 ) | C | 22       | 0.28 | 2.67 | 0.024 |
| 87.  | LP | ( 2 ) | S  | 4      | 726. | RY  | ( 7 ) | C | 22       | 0.48 | 2.59 | 0.031 |
| 87.  | LP | ( 2 ) | S  | 4      | 730. | RY  | (11)  | C | 22       | 0.89 | 3.73 | 0.052 |
| 87.  | LP | ( 2 ) | S  | 4      | 731. | RY  | (12)  | C | 22       | 0.26 | 3.41 | 0.026 |
| 87.  | LP | ( 2 ) | S  | 4      | 732. | RY  | (13)  | C | 22       | 0.14 | 3.23 | 0.019 |
| 87.  | LP | ( 2 ) | S  | 4      | 734. | RY  | (15)  | C | 22       | 0.17 | 4.56 | 0.025 |
| 87.  | LP | ( 2 ) | S  | 4      | 735. | RY  | (16)  | C | 22       | 0.09 | 4.17 | 0.018 |
| 87.  | LP | ( 2 ) | S  | 4      | 737. | RY  | (18)  | C | 22       | 0.07 | 3.57 | 0.014 |
| 87.  | LP | ( 2 ) | S  | 4      | 740. | RY  | (21)  | C | 22       | 0.10 | 4.09 | 0.018 |
| 87.  | LP | ( 2 ) | S  | 4      | 749. | RY  | ( 4 ) | C | 23       | 0.06 | 1.72 | 0.009 |
| 87.  | LP | ( 2 ) | S  | 4      | 786. | RY  | (10)  | C | 25       | 0.08 | 2.54 | 0.013 |
| 87.  | LP | ( 2 ) | S  | 4      | 808. | RY  | ( 1 ) | C | 27       | 0.88 | 2.13 | 0.039 |
| 87.  | LP | ( 2 ) | S  | 4      | 810. | RY  | ( 3 ) | C | 27       | 0.20 | 1.67 | 0.016 |
| 87.  | LP | ( 2 ) | S  | 4      | 811. | RY  | ( 4 ) | C | 27       | 0.97 | 1.91 | 0.038 |
| 87.  | LP | ( 2 ) | S  | 4      | 813. | RY  | ( 6 ) | C | 27       | 0.46 | 2.27 | 0.029 |
| 87.  | LP | ( 2 ) | S  | 4      | 815. | RY  | ( 8 ) | C | 27       | 0.72 | 3.33 | 0.044 |
| 87.  | LP | ( 2 ) | S  | 4      | 816. | RY  | ( 9 ) | C | 27       | 0.31 | 2.75 | 0.026 |
| 87.  | LP | ( 2 ) | S  | 4      | 817. | RY  | (10)  | C | 27       | 0.18 | 2.66 | 0.019 |
| 87.  | LP | ( 2 ) | S  | 4      | 818. | RY  | (11)  | C | 27       | 0.17 | 2.68 | 0.019 |
| 87.  | LP | ( 2 ) | S  | 4      | 819. | RY  | (12)  | C | 27       | 0.06 | 3.46 | 0.013 |
| 87.  | LP | ( 2 ) | S  | 4      | 823. | RY  | (16)  | C | 27       | 0.31 | 2.82 | 0.027 |
| 87.  | LP | ( 2 ) | S  | 4      | 834. | RY  | ( 1 ) | H | 28       | 1.56 | 1.86 | 0.048 |
| 87.  | LP | ( 2 ) | S  | 4      | 835. | RY  | ( 2 ) | H | 28       | 0.14 | 2.57 | 0.017 |
| 87.  | LP | ( 2 ) | S  | 4      | 838. | RY  | ( 5 ) | H | 28       | 0.09 | 3.55 | 0.016 |
| 117. | BD | ( 1 ) | Pt | 1- S 2 | 195. | BD* | ( 1 ) | N | 7- C 10  | 0.07 | 0.85 | 0.007 |
| 117. | BD | ( 1 ) | Pt | 1- S 2 | 197. | BD* | ( 1 ) | N | 7- C 17  | 0.15 | 0.82 | 0.010 |
| 117. | BD | ( 1 ) | Pt | 1- S 2 | 199. | BD* | ( 1 ) | N | 8- C 27  | 0.06 | 0.90 | 0.007 |
| 117. | BD | ( 1 ) | Pt | 1- S 2 | 224. | BD* | ( 1 ) | C | 27- H 28 | 0.05 | 1.10 | 0.007 |
| 117. | BD | ( 1 ) | Pt | 1- S 2 | 414. | RY  | ( 1 ) | N | 7        | 4.20 | 4.90 | 0.128 |
| 117. | BD | ( 1 ) | Pt | 1- S 2 | 415. | RY  | ( 2 ) | N | 7        | 0.68 | 1.44 | 0.028 |
| 117. | BD | ( 1 ) | Pt | 1- S 2 | 416. | RY  | ( 3 ) | N | 7        | 0.08 | 1.94 | 0.011 |
| 117. | BD | ( 1 ) | Pt | 1- S 2 | 417. | RY  | ( 4 ) | N | 7        | 0.74 | 2.71 | 0.040 |
| 117. | BD | ( 1 ) | Pt | 1- S 2 | 422. | RY  | ( 9 ) | N | 7        | 0.10 | 4.69 | 0.019 |
| 117. | BD | ( 1 ) | Pt | 1- S 2 | 424. | RY  | (11)  | N | 7        | 0.09 | 5.12 | 0.019 |
| 117. | BD | ( 1 ) | Pt | 1- S 2 | 426. | RY  | (13)  | N | 7        | 0.17 | 4.47 | 0.024 |
| 117. | BD | ( 1 ) | Pt | 1- S 2 | 427. | RY  | (14)  | N | 7        | 0.06 | 4.45 | 0.015 |
| 117. | BD | ( 1 ) | Pt | 1- S 2 | 428. | RY  | (15)  | N | 7        | 0.11 | 4.88 | 0.021 |
| 117. | BD | ( 1 ) | Pt | 1- S 2 | 440. | RY  | ( 1 ) | N | 8        | 0.58 | 4.84 | 0.047 |
| 117. | BD | ( 1 ) | Pt | 1- S 2 | 441. | RY  | ( 2 ) | N | 8        | 0.14 | 1.58 | 0.013 |
| 117. | BD | ( 1 ) | Pt | 1- S 2 | 442. | RY  | ( 3 ) | N | 8        | 0.31 | 1.92 | 0.022 |
| 117. | BD | ( 1 ) | Pt | 1- S 2 | 443. | RY  | ( 4 ) | N | 8        | 1.40 | 2.80 | 0.056 |
| 117. | BD | ( 1 ) | Pt | 1- S 2 | 446. | RY  | ( 7 ) | N | 8        | 0.06 | 3.75 | 0.014 |
| 117. | BD | ( 1 ) | Pt | 1- S 2 | 447. | RY  | ( 8 ) | N | 8        | 0.16 | 3.29 | 0.021 |
| 117. | BD | ( 1 ) | Pt | 1- S 2 | 448. | RY  | ( 9 ) | N | 8        | 0.28 | 4.73 | 0.033 |
| 117. | BD | ( 1 ) | Pt | 1- S 2 | 449. | RY  | (10)  | N | 8        | 0.06 | 4.27 | 0.014 |
| 117. | BD | ( 1 ) | Pt | 1- S 2 | 451. | RY  | (12)  | N | 8        | 0.33 | 4.06 | 0.033 |
| 117. | BD | ( 1 ) | Pt | 1- S 2 | 452. | RY  | (13)  | N | 8        | 0.47 | 3.98 | 0.039 |
| 117. | BD | ( 1 ) | Pt | 1- S 2 | 453. | RY  | (14)  | N | 8        | 0.06 | 4.86 | 0.015 |
| 117. | BD | ( 1 ) | Pt | 1- S 2 | 492. | RY  | ( 1 ) | C | 10       | 0.56 | 2.13 | 0.031 |
| 117. | BD | ( 1 ) | Pt | 1- S 2 | 493. | RY  | ( 2 ) | C | 10       | 0.19 | 1.59 | 0.015 |
| 117. | BD | ( 1 ) | Pt | 1- S 2 | 495. | RY  | ( 4 ) | C | 10       | 0.82 | 1.97 | 0.036 |
| 117. | BD | ( 1 ) | Pt | 1- S 2 | 497. | RY  | ( 6 ) | C | 10       | 0.06 | 3.73 | 0.013 |
| 117. | BD | ( 1 ) | Pt | 1- S 2 | 498. | RY  | ( 7 ) | C | 10       | 0.07 | 1.98 | 0.010 |
| 117. | BD | ( 1 ) | Pt | 1- S 2 | 499. | RY  | ( 8 ) | C | 10       | 0.53 | 3.16 | 0.037 |
| 117. | BD | ( 1 ) | Pt | 1- S 2 | 504. | RY  | (13)  | C | 10       | 0.28 | 3.12 | 0.027 |
| 117. | BD | ( 1 ) | Pt | 1- S 2 | 508. | RY  | (17)  | C | 10       | 0.07 | 3.55 | 0.014 |
| 117. | BD | ( 1 ) | Pt | 1- S 2 | 518. | RY  | ( 1 ) | H | 11       | 0.23 | 1.81 | 0.018 |
| 117. | BD | ( 1 ) | Pt | 1- S 2 | 519. | RY  | ( 2 ) | H | 11       | 0.08 | 2.69 | 0.013 |
| 117. | BD | ( 1 ) | Pt | 1- S 2 | 526. | RY  | ( 4 ) | C | 12       | 0.05 | 1.76 | 0.009 |
| 117. | BD | ( 1 ) | Pt | 1- S 2 | 564. | RY  | (11)  | C | 14       | 0.07 | 2.96 | 0.013 |
| 117. | BD | ( 1 ) | Pt | 1- S 2 | 611. | RY  | ( 1 ) | C | 17       | 1.39 | 2.72 | 0.055 |
| 117. | BD | ( 1 ) | Pt | 1- S 2 | 613. | RY  | ( 3 ) | C | 17       | 0.15 | 1.66 | 0.014 |
| 117. | BD | ( 1 ) | Pt | 1- S 2 | 614. | RY  | ( 4 ) | C | 17       | 0.66 | 3.03 | 0.040 |
| 117. | BD | ( 1 ) | Pt | 1- S 2 | 615. | RY  | ( 5 ) | C | 17       | 0.30 | 3.41 | 0.029 |
| 117. | BD | ( 1 ) | Pt | 1- S 2 | 616. | RY  | ( 6 ) | C | 17       | 0.40 | 2.80 | 0.030 |
| 117. | BD | ( 1 ) | Pt | 1- S 2 | 622. | RY  | (12)  | C | 17       | 0.30 | 3.69 | 0.030 |
| 117. | BD | ( 1 ) | Pt | 1- S 2 | 625. | RY  | (15)  | C | 17       | 0.18 | 4.45 | 0.025 |
| 117. | BD | ( 1 ) | Pt | 1- S 2 | 628. | RY  | (18)  | C | 17       | 0.08 | 2.96 | 0.014 |
| 117. | BD | ( 1 ) | Pt | 1- S 2 | 704. | RY  | (11)  | C | 21       | 0.12 | 2.95 | 0.017 |
| 117. | BD | ( 1 ) | Pt | 1- S 2 | 720. | RY  | ( 1 ) | C | 22       | 0.37 | 2.56 | 0.028 |
| 117. | BD | ( 1 ) | Pt | 1- S 2 | 722. | RY  | ( 3 ) | C | 22       | 0.42 | 1.79 | 0.025 |
| 117. | BD | ( 1 ) | Pt | 1- S 2 | 723. | RY  | ( 4 ) | C | 22       | 0.90 | 2.92 | 0.046 |
| 117. | BD | ( 1 ) | Pt | 1- S 2 | 724. | RY  | ( 5 ) | C | 22       | 0.20 | 2.91 | 0.021 |
| 117. | BD | ( 1 ) | Pt | 1- S 2 | 726. | RY  | ( 7 ) | C | 22       | 0.24 | 2.82 | 0.023 |
| 117. | BD | ( 1 ) | Pt | 1- S 2 | 730. | RY  | (11)  | C | 22       | 0.56 | 3.96 | 0.042 |
| 117. | BD | ( 1 ) | Pt | 1- S 2 | 731. | RY  | (12)  | C | 22       | 0.13 | 3.64 | 0.019 |
| 117. | BD | ( 1 ) | Pt | 1- S 2 | 732. | RY  | (13)  | C | 22       | 0.06 | 3.46 | 0.013 |
| 117. | BD | ( 1 ) | Pt | 1- S 2 | 734. | RY  | (15)  | C | 22       | 0.07 | 4.79 | 0.017 |
| 117. | BD | ( 1 ) | Pt | 1- S 2 | 740. | RY  | (21)  | C | 22       | 0.05 | 4.32 | 0.014 |
| 117. | BD | ( 1 ) | Pt | 1- S 2 | 808. | RY  | ( 1 ) | C | 27       | 0.35 | 2.37 | 0.026 |
| 117. | BD | ( 1 ) | Pt | 1- S 2 | 811. | RY  | ( 4 ) | C | 27       | 0.32 | 2.14 | 0.023 |
| 117. | BD | ( 1 ) | Pt | 1- S 2 | 813. | RY  | ( 6 ) | C | 27       | 0.21 | 2.50 | 0.021 |
| 117. | BD | ( 1 ) | Pt | 1- S 2 | 815. | RY  | ( 8 ) | C | 27       | 0.28 | 3.57 | 0.028 |
| 117. | BD | ( 1 ) | Pt | 1- S 2 | 816. | RY  | ( 9 ) | C | 27       | 0.15 | 2.99 | 0.019 |
| 117. | BD | ( 1 ) | Pt | 1- S 2 | 817. | RY  | (10)  | C | 27       | 0.07 | 2.89 | 0.013 |
| 117. | BD | ( 1 ) | Pt | 1- S 2 | 823. | RY  | (16)  | C | 27       | 0.24 | 3.05 | 0.024 |
| 117. | BD | ( 1 ) | Pt | 1- S 2 | 834. | RY  | ( 1 ) | H | 28       | 0.57 | 2.09 | 0.031 |
| 117. | BD | ( 1 ) | Pt | 1- S 2 | 835. | RY  | ( 2 ) | H | 28       | 0.10 | 2.80 | 0.015 |
| 118. | BD | ( 1 ) | Pt | 1- S 3 | 195. | BD* | ( 1 ) | N | 7- C 10  | 0.08 | 0.86 | 0.008 |
| 118. | BD | ( 1 ) | Pt | 1- S 3 | 198. | BD* | ( 1 ) | N | 8- C 22  | 0.17 | 0.77 | 0.010 |
| 118. | BD | ( 1 ) | Pt | 1- S 3 | 199. | BD* | ( 1 ) | N | 8- C 27  | 0.06 | 0.91 | 0.007 |
| 118. | BD | ( 1 ) | Pt | 1- S 3 | 414. | RY  | ( 1 ) | N | 7        | 0.55 | 4.91 | 0.046 |
| 118. | BD | ( 1 ) | Pt | 1- S 3 | 416. | RY  | ( 3 ) | N | 7        | 0.42 | 1.95 | 0.025 |
| 118. | BD | ( 1 ) | Pt | 1- S 3 | 417. | RY  | ( 4 ) | N | 7        | 1.31 | 2.72 | 0.053 |
| 118. | BD | ( 1 ) | Pt | 1- S 3 | 420. | RY  | ( 7 ) | N | 7        | 0.16 | 4.51 | 0.024 |



|      |    |        |         |      |    |           |      |      |       |
|------|----|--------|---------|------|----|-----------|------|------|-------|
| 118. | BD | ( 1)Pt | 1- S 3  | 422. | RY | ( 9) N 7  | 0.38 | 4.70 | 0.038 |
| 118. | BD | ( 1)Pt | 1- S 3  | 423. | RY | (10) N 7  | 0.05 | 3.94 | 0.013 |
| 118. | BD | ( 1)Pt | 1- S 3  | 424. | RY | (11) N 7  | 0.06 | 5.13 | 0.015 |
| 118. | BD | ( 1)Pt | 1- S 3  | 426. | RY | (13) N 7  | 0.23 | 4.48 | 0.029 |
| 118. | BD | ( 1)Pt | 1- S 3  | 427. | RY | (14) N 7  | 0.15 | 4.46 | 0.023 |
| 118. | BD | ( 1)Pt | 1- S 3  | 428. | RY | (15) N 7  | 0.12 | 4.89 | 0.022 |
| 118. | BD | ( 1)Pt | 1- S 3  | 440. | RY | ( 1) N 8  | 4.06 | 4.85 | 0.125 |
| 118. | BD | ( 1)Pt | 1- S 3  | 441. | RY | ( 2) N 8  | 1.13 | 1.59 | 0.038 |
| 118. | BD | ( 1)Pt | 1- S 3  | 443. | RY | ( 4) N 8  | 0.82 | 2.81 | 0.043 |
| 118. | BD | ( 1)Pt | 1- S 3  | 448. | RY | ( 9) N 8  | 0.05 | 4.74 | 0.014 |
| 118. | BD | ( 1)Pt | 1- S 3  | 451. | RY | (12) N 8  | 0.21 | 4.07 | 0.026 |
| 118. | BD | ( 1)Pt | 1- S 3  | 452. | RY | (13) N 8  | 0.29 | 3.99 | 0.030 |
| 118. | BD | ( 1)Pt | 1- S 3  | 464. | RY | (25) N 8  | 0.09 | 5.37 | 0.020 |
| 118. | BD | ( 1)Pt | 1- S 3  | 492. | RY | ( 1) C 10 | 0.20 | 2.14 | 0.018 |
| 118. | BD | ( 1)Pt | 1- S 3  | 493. | RY | ( 2) C 10 | 0.08 | 1.60 | 0.010 |
| 118. | BD | ( 1)Pt | 1- S 3  | 495. | RY | ( 4) C 10 | 0.30 | 1.98 | 0.022 |
| 118. | BD | ( 1)Pt | 1- S 3  | 499. | RY | ( 8) C 10 | 0.38 | 3.17 | 0.031 |
| 118. | BD | ( 1)Pt | 1- S 3  | 504. | RY | (13) C 10 | 0.13 | 3.13 | 0.018 |
| 118. | BD | ( 1)Pt | 1- S 3  | 508. | RY | (17) C 10 | 0.11 | 3.56 | 0.018 |
| 118. | BD | ( 1)Pt | 1- S 3  | 518. | RY | ( 1) H 11 | 0.14 | 1.82 | 0.014 |
| 118. | BD | ( 1)Pt | 1- S 3  | 519. | RY | ( 2) H 11 | 0.05 | 2.70 | 0.011 |
| 118. | BD | ( 1)Pt | 1- S 3  | 564. | RY | (11) C 14 | 0.06 | 2.97 | 0.012 |
| 118. | BD | ( 1)Pt | 1- S 3  | 596. | RY | (12) C 16 | 0.05 | 2.90 | 0.011 |
| 118. | BD | ( 1)Pt | 1- S 3  | 611. | RY | ( 1) C 17 | 0.41 | 2.73 | 0.030 |
| 118. | BD | ( 1)Pt | 1- S 3  | 613. | RY | ( 3) C 17 | 0.23 | 1.67 | 0.017 |
| 118. | BD | ( 1)Pt | 1- S 3  | 614. | RY | ( 4) C 17 | 0.90 | 3.04 | 0.047 |
| 118. | BD | ( 1)Pt | 1- S 3  | 615. | RY | ( 5) C 17 | 0.31 | 3.42 | 0.029 |
| 118. | BD | ( 1)Pt | 1- S 3  | 616. | RY | ( 6) C 17 | 0.35 | 2.81 | 0.028 |
| 118. | BD | ( 1)Pt | 1- S 3  | 617. | RY | ( 7) C 17 | 0.07 | 3.04 | 0.013 |
| 118. | BD | ( 1)Pt | 1- S 3  | 620. | RY | (10) C 17 | 0.06 | 3.26 | 0.013 |
| 118. | BD | ( 1)Pt | 1- S 3  | 622. | RY | (12) C 17 | 0.36 | 3.70 | 0.033 |
| 118. | BD | ( 1)Pt | 1- S 3  | 625. | RY | (15) C 17 | 0.08 | 4.46 | 0.017 |
| 118. | BD | ( 1)Pt | 1- S 3  | 628. | RY | (18) C 17 | 0.13 | 2.97 | 0.018 |
| 118. | BD | ( 1)Pt | 1- S 3  | 696. | RY | ( 3) C 21 | 0.05 | 1.81 | 0.009 |
| 118. | BD | ( 1)Pt | 1- S 3  | 704. | RY | (11) C 21 | 0.09 | 2.96 | 0.014 |
| 118. | BD | ( 1)Pt | 1- S 3  | 720. | RY | ( 1) C 22 | 1.27 | 2.57 | 0.051 |
| 118. | BD | ( 1)Pt | 1- S 3  | 721. | RY | ( 2) C 22 | 0.13 | 2.13 | 0.015 |
| 118. | BD | ( 1)Pt | 1- S 3  | 722. | RY | ( 3) C 22 | 0.25 | 1.80 | 0.019 |
| 118. | BD | ( 1)Pt | 1- S 3  | 723. | RY | ( 4) C 22 | 0.67 | 2.93 | 0.040 |
| 118. | BD | ( 1)Pt | 1- S 3  | 724. | RY | ( 5) C 22 | 0.19 | 2.92 | 0.021 |
| 118. | BD | ( 1)Pt | 1- S 3  | 726. | RY | ( 7) C 22 | 0.28 | 2.83 | 0.025 |
| 118. | BD | ( 1)Pt | 1- S 3  | 730. | RY | (11) C 22 | 0.47 | 3.97 | 0.039 |
| 118. | BD | ( 1)Pt | 1- S 3  | 731. | RY | (12) C 22 | 0.11 | 3.65 | 0.018 |
| 118. | BD | ( 1)Pt | 1- S 3  | 732. | RY | (13) C 22 | 0.10 | 3.47 | 0.017 |
| 118. | BD | ( 1)Pt | 1- S 3  | 734. | RY | (15) C 22 | 0.13 | 4.80 | 0.022 |
| 118. | BD | ( 1)Pt | 1- S 3  | 735. | RY | (16) C 22 | 0.07 | 4.41 | 0.015 |
| 118. | BD | ( 1)Pt | 1- S 3  | 740. | RY | (21) C 22 | 0.05 | 4.33 | 0.014 |
| 118. | BD | ( 1)Pt | 1- S 3  | 780. | RY | ( 4) C 25 | 0.08 | 1.89 | 0.011 |
| 118. | BD | ( 1)Pt | 1- S 3  | 808. | RY | ( 1) C 27 | 0.88 | 2.38 | 0.041 |
| 118. | BD | ( 1)Pt | 1- S 3  | 809. | RY | ( 2) C 27 | 0.08 | 1.54 | 0.010 |
| 118. | BD | ( 1)Pt | 1- S 3  | 811. | RY | ( 4) C 27 | 0.82 | 2.15 | 0.037 |
| 118. | BD | ( 1)Pt | 1- S 3  | 813. | RY | ( 6) C 27 | 0.22 | 2.51 | 0.021 |
| 118. | BD | ( 1)Pt | 1- S 3  | 815. | RY | ( 8) C 27 | 0.33 | 3.58 | 0.031 |
| 118. | BD | ( 1)Pt | 1- S 3  | 816. | RY | ( 9) C 27 | 0.18 | 3.00 | 0.021 |
| 118. | BD | ( 1)Pt | 1- S 3  | 817. | RY | (10) C 27 | 0.17 | 2.90 | 0.020 |
| 118. | BD | ( 1)Pt | 1- S 3  | 818. | RY | (11) C 27 | 0.06 | 2.92 | 0.011 |
| 118. | BD | ( 1)Pt | 1- S 3  | 823. | RY | (16) C 27 | 0.21 | 3.06 | 0.022 |
| 118. | BD | ( 1)Pt | 1- S 3  | 834. | RY | ( 1) H 28 | 0.74 | 2.10 | 0.035 |
| 118. | BD | ( 1)Pt | 1- S 3  | 835. | RY | ( 2) H 28 | 0.11 | 2.81 | 0.016 |
| 118. | BD | ( 1)Pt | 1- S 3  | 838. | RY | ( 5) H 28 | 0.06 | 3.79 | 0.013 |
| 119. | BD | ( 1) S | 2- C 29 | 414. | RY | ( 1) N 7  | 0.54 | 5.01 | 0.047 |
| 119. | BD | ( 1) S | 2- C 29 | 415. | RY | ( 2) N 7  | 0.08 | 1.54 | 0.010 |
| 119. | BD | ( 1) S | 2- C 29 | 440. | RY | ( 1) N 8  | 0.84 | 4.95 | 0.058 |
| 119. | BD | ( 1) S | 2- C 29 | 441. | RY | ( 2) N 8  | 0.23 | 1.68 | 0.018 |
| 119. | BD | ( 1) S | 2- C 29 | 443. | RY | ( 4) N 8  | 0.06 | 2.91 | 0.012 |
| 119. | BD | ( 1) S | 2- C 29 | 451. | RY | (12) N 8  | 0.08 | 4.17 | 0.016 |
| 119. | BD | ( 1) S | 2- C 29 | 452. | RY | (13) N 8  | 0.08 | 4.08 | 0.016 |
| 119. | BD | ( 1) S | 2- C 29 | 494. | RY | ( 3) C 10 | 0.11 | 2.03 | 0.013 |
| 119. | BD | ( 1) S | 2- C 29 | 495. | RY | ( 4) C 10 | 0.07 | 2.07 | 0.011 |
| 119. | BD | ( 1) S | 2- C 29 | 499. | RY | ( 8) C 10 | 0.17 | 3.27 | 0.021 |
| 119. | BD | ( 1) S | 2- C 29 | 504. | RY | (13) C 10 | 0.08 | 3.22 | 0.014 |
| 119. | BD | ( 1) S | 2- C 29 | 518. | RY | ( 1) H 11 | 0.49 | 1.91 | 0.027 |
| 119. | BD | ( 1) S | 2- C 29 | 611. | RY | ( 1) C 17 | 0.16 | 2.83 | 0.019 |
| 119. | BD | ( 1) S | 2- C 29 | 614. | RY | ( 4) C 17 | 0.20 | 3.13 | 0.022 |
| 119. | BD | ( 1) S | 2- C 29 | 616. | RY | ( 6) C 17 | 0.05 | 2.90 | 0.011 |
| 119. | BD | ( 1) S | 2- C 29 | 622. | RY | (12) C 17 | 0.06 | 3.79 | 0.013 |
| 119. | BD | ( 1) S | 2- C 29 | 720. | RY | ( 1) C 22 | 0.16 | 2.67 | 0.018 |
| 119. | BD | ( 1) S | 2- C 29 | 721. | RY | ( 2) C 22 | 0.09 | 2.23 | 0.013 |
| 119. | BD | ( 1) S | 2- C 29 | 722. | RY | ( 3) C 22 | 0.06 | 1.90 | 0.009 |
| 119. | BD | ( 1) S | 2- C 29 | 723. | RY | ( 4) C 22 | 0.20 | 3.02 | 0.022 |
| 119. | BD | ( 1) S | 2- C 29 | 726. | RY | ( 7) C 22 | 0.06 | 2.93 | 0.012 |
| 119. | BD | ( 1) S | 2- C 29 | 730. | RY | (11) C 22 | 0.10 | 4.07 | 0.018 |
| 119. | BD | ( 1) S | 2- C 29 | 808. | RY | ( 1) C 27 | 0.14 | 2.47 | 0.016 |
| 119. | BD | ( 1) S | 2- C 29 | 811. | RY | ( 4) C 27 | 0.12 | 2.25 | 0.015 |
| 119. | BD | ( 1) S | 2- C 29 | 813. | RY | ( 6) C 27 | 0.05 | 2.61 | 0.010 |
| 119. | BD | ( 1) S | 2- C 29 | 815. | RY | ( 8) C 27 | 0.08 | 3.67 | 0.015 |
| 119. | BD | ( 1) S | 2- C 29 | 834. | RY | ( 1) H 28 | 0.25 | 2.20 | 0.021 |
| 120. | BD | ( 1) S | 2- C 44 | 414. | RY | ( 1) N 7  | 0.84 | 5.02 | 0.058 |
| 120. | BD | ( 1) S | 2- C 44 | 415. | RY | ( 2) N 7  | 0.15 | 1.55 | 0.013 |
| 120. | BD | ( 1) S | 2- C 44 | 416. | RY | ( 3) N 7  | 0.06 | 2.06 | 0.010 |
| 120. | BD | ( 1) S | 2- C 44 | 417. | RY | ( 4) N 7  | 0.15 | 2.83 | 0.019 |
| 120. | BD | ( 1) S | 2- C 44 | 426. | RY | (13) N 7  | 0.07 | 4.59 | 0.016 |
| 120. | BD | ( 1) S | 2- C 44 | 428. | RY | (15) N 7  | 0.06 | 4.99 | 0.015 |
| 120. | BD | ( 1) S | 2- C 44 | 440. | RY | ( 1) N 8  | 1.52 | 4.96 | 0.077 |
| 120. | BD | ( 1) S | 2- C 44 | 441. | RY | ( 2) N 8  | 0.19 | 1.69 | 0.016 |
| 120. | BD | ( 1) S | 2- C 44 | 443. | RY | ( 4) N 8  | 0.09 | 2.92 | 0.015 |
| 120. | BD | ( 1) S | 2- C 44 | 451. | RY | (12) N 8  | 0.15 | 4.18 | 0.022 |
| 120. | BD | ( 1) S | 2- C 44 | 452. | RY | (13) N 8  | 0.20 | 4.09 | 0.025 |
| 120. | BD | ( 1) S | 2- C 44 | 492. | RY | ( 1) C 10 | 0.16 | 2.25 | 0.017 |
| 120. | BD | ( 1) S | 2- C 44 | 495. | RY | ( 4) C 10 | 0.21 | 2.08 | 0.019 |
| 120. | BD | ( 1) S | 2- C 44 | 499. | RY | ( 8) C 10 | 0.13 | 3.28 | 0.019 |
| 120. | BD | ( 1) S | 2- C 44 | 518. | RY | ( 1) H 11 | 0.09 | 1.92 | 0.012 |
| 120. | BD | ( 1) S | 2- C 44 | 519. | RY | ( 2) H 11 | 0.06 | 2.81 | 0.011 |

|                       |    |       |    |     |   |    |       |     |       |    |          |      |       |       |
|-----------------------|----|-------|----|-----|---|----|-------|-----|-------|----|----------|------|-------|-------|
| 120.                  | BD | ( 1 ) | S  | 2-  | C | 44 | 611.  | RY  | ( 1 ) | C  | 17       | 0.27 | 2.84  | 0.025 |
| 120.                  | BD | ( 1 ) | S  | 2-  | C | 44 | 613.  | RY  | ( 3 ) | C  | 17       | 0.09 | 1.78  | 0.012 |
| 120.                  | BD | ( 1 ) | S  | 2-  | C | 44 | 614.  | RY  | ( 4 ) | C  | 17       | 0.42 | 3.14  | 0.033 |
| 120.                  | BD | ( 1 ) | S  | 2-  | C | 44 | 615.  | RY  | ( 5 ) | C  | 17       | 0.10 | 3.52  | 0.016 |
| 120.                  | BD | ( 1 ) | S  | 2-  | C | 44 | 616.  | RY  | ( 6 ) | C  | 17       | 0.12 | 2.91  | 0.017 |
| 120.                  | BD | ( 1 ) | S  | 2-  | C | 44 | 622.  | RY  | (12)  | C  | 17       | 0.15 | 3.80  | 0.021 |
| 120.                  | BD | ( 1 ) | S  | 2-  | C | 44 | 625.  | RY  | (15)  | C  | 17       | 0.05 | 4.57  | 0.014 |
| 120.                  | BD | ( 1 ) | S  | 2-  | C | 44 | 720.  | RY  | ( 1 ) | C  | 22       | 0.32 | 2.68  | 0.026 |
| 120.                  | BD | ( 1 ) | S  | 2-  | C | 44 | 721.  | RY  | ( 2 ) | C  | 22       | 0.13 | 2.24  | 0.015 |
| 120.                  | BD | ( 1 ) | S  | 2-  | C | 44 | 722.  | RY  | ( 3 ) | C  | 22       | 0.11 | 1.91  | 0.013 |
| 120.                  | BD | ( 1 ) | S  | 2-  | C | 44 | 723.  | RY  | ( 4 ) | C  | 22       | 0.37 | 3.03  | 0.030 |
| 120.                  | BD | ( 1 ) | S  | 2-  | C | 44 | 724.  | RY  | ( 5 ) | C  | 22       | 0.06 | 3.02  | 0.012 |
| 120.                  | BD | ( 1 ) | S  | 2-  | C | 44 | 726.  | RY  | ( 7 ) | C  | 22       | 0.10 | 2.94  | 0.015 |
| 120.                  | BD | ( 1 ) | S  | 2-  | C | 44 | 730.  | RY  | (11)  | C  | 22       | 0.18 | 4.08  | 0.024 |
| 120.                  | BD | ( 1 ) | S  | 2-  | C | 44 | 808.  | RY  | ( 1 ) | C  | 27       | 0.22 | 2.48  | 0.021 |
| 120.                  | BD | ( 1 ) | S  | 2-  | C | 44 | 810.  | RY  | ( 3 ) | C  | 27       | 0.05 | 2.02  | 0.009 |
| 120.                  | BD | ( 1 ) | S  | 2-  | C | 44 | 811.  | RY  | ( 4 ) | C  | 27       | 0.18 | 2.26  | 0.018 |
| 120.                  | BD | ( 1 ) | S  | 2-  | C | 44 | 813.  | RY  | ( 6 ) | C  | 27       | 0.09 | 2.62  | 0.013 |
| 120.                  | BD | ( 1 ) | S  | 2-  | C | 44 | 815.  | RY  | ( 8 ) | C  | 27       | 0.15 | 3.68  | 0.021 |
| 120.                  | BD | ( 1 ) | S  | 2-  | C | 44 | 816.  | RY  | ( 9 ) | C  | 27       | 0.06 | 3.10  | 0.012 |
| 120.                  | BD | ( 1 ) | S  | 2-  | C | 44 | 823.  | RY  | (16)  | C  | 27       | 0.06 | 3.16  | 0.012 |
| 120.                  | BD | ( 1 ) | S  | 2-  | C | 44 | 834.  | RY  | ( 1 ) | H  | 28       | 0.36 | 2.21  | 0.025 |
| 121.                  | BD | ( 1 ) | S  | 3-  | C | 32 | 414.  | RY  | ( 1 ) | N  | 7        | 1.25 | 5.02  | 0.071 |
| 121.                  | BD | ( 1 ) | S  | 3-  | C | 32 | 415.  | RY  | ( 2 ) | N  | 7        | 0.30 | 1.55  | 0.019 |
| 121.                  | BD | ( 1 ) | S  | 3-  | C | 32 | 417.  | RY  | ( 4 ) | N  | 7        | 0.06 | 2.83  | 0.012 |
| 121.                  | BD | ( 1 ) | S  | 3-  | C | 32 | 424.  | RY  | (11)  | N  | 7        | 0.06 | 5.23  | 0.016 |
| 121.                  | BD | ( 1 ) | S  | 3-  | C | 32 | 426.  | RY  | (13)  | N  | 7        | 0.07 | 4.58  | 0.016 |
| 121.                  | BD | ( 1 ) | S  | 3-  | C | 32 | 428.  | RY  | (15)  | N  | 7        | 0.06 | 4.99  | 0.015 |
| 121.                  | BD | ( 1 ) | S  | 3-  | C | 32 | 440.  | RY  | ( 1 ) | N  | 8        | 0.86 | 4.95  | 0.058 |
| 121.                  | BD | ( 1 ) | S  | 3-  | C | 32 | 441.  | RY  | ( 2 ) | N  | 8        | 0.20 | 1.69  | 0.016 |
| 121.                  | BD | ( 1 ) | S  | 3-  | C | 32 | 443.  | RY  | ( 4 ) | N  | 8        | 0.08 | 2.92  | 0.013 |
| 121.                  | BD | ( 1 ) | S  | 3-  | C | 32 | 451.  | RY  | (12)  | N  | 8        | 0.08 | 4.18  | 0.017 |
| 121.                  | BD | ( 1 ) | S  | 3-  | C | 32 | 452.  | RY  | (13)  | N  | 8        | 0.13 | 4.09  | 0.021 |
| 121.                  | BD | ( 1 ) | S  | 3-  | C | 32 | 492.  | RY  | ( 1 ) | C  | 10       | 0.13 | 2.24  | 0.015 |
| 121.                  | BD | ( 1 ) | S  | 3-  | C | 32 | 495.  | RY  | ( 4 ) | C  | 10       | 0.19 | 2.08  | 0.018 |
| 121.                  | BD | ( 1 ) | S  | 3-  | C | 32 | 499.  | RY  | ( 8 ) | C  | 10       | 0.15 | 3.27  | 0.020 |
| 121.                  | BD | ( 1 ) | S  | 3-  | C | 32 | 504.  | RY  | (13)  | C  | 10       | 0.06 | 3.23  | 0.013 |
| 121.                  | BD | ( 1 ) | S  | 3-  | C | 32 | 518.  | RY  | ( 1 ) | H  | 11       | 0.16 | 1.92  | 0.015 |
| 121.                  | BD | ( 1 ) | S  | 3-  | C | 32 | 611.  | RY  | ( 1 ) | C  | 17       | 0.27 | 2.83  | 0.025 |
| 121.                  | BD | ( 1 ) | S  | 3-  | C | 32 | 612.  | RY  | ( 2 ) | C  | 17       | 0.06 | 2.12  | 0.010 |
| 121.                  | BD | ( 1 ) | S  | 3-  | C | 32 | 613.  | RY  | ( 3 ) | C  | 17       | 0.06 | 1.77  | 0.009 |
| 121.                  | BD | ( 1 ) | S  | 3-  | C | 32 | 614.  | RY  | ( 4 ) | C  | 17       | 0.30 | 3.14  | 0.028 |
| 121.                  | BD | ( 1 ) | S  | 3-  | C | 32 | 615.  | RY  | ( 5 ) | C  | 17       | 0.10 | 3.52  | 0.017 |
| 121.                  | BD | ( 1 ) | S  | 3-  | C | 32 | 616.  | RY  | ( 6 ) | C  | 17       | 0.15 | 2.91  | 0.018 |
| 121.                  | BD | ( 1 ) | S  | 3-  | C | 32 | 622.  | RY  | (12)  | C  | 17       | 0.10 | 3.80  | 0.017 |
| 121.                  | BD | ( 1 ) | S  | 3-  | C | 32 | 720.  | RY  | ( 1 ) | C  | 22       | 0.20 | 2.68  | 0.021 |
| 121.                  | BD | ( 1 ) | S  | 3-  | C | 32 | 721.  | RY  | ( 2 ) | C  | 22       | 0.14 | 2.23  | 0.016 |
| 121.                  | BD | ( 1 ) | S  | 3-  | C | 32 | 722.  | RY  | ( 3 ) | C  | 22       | 0.10 | 1.90  | 0.012 |
| 121.                  | BD | ( 1 ) | S  | 3-  | C | 32 | 723.  | RY  | ( 4 ) | C  | 22       | 0.32 | 3.03  | 0.028 |
| 121.                  | BD | ( 1 ) | S  | 3-  | C | 32 | 726.  | RY  | ( 7 ) | C  | 22       | 0.07 | 2.93  | 0.012 |
| 121.                  | BD | ( 1 ) | S  | 3-  | C | 32 | 730.  | RY  | (11)  | C  | 22       | 0.14 | 4.07  | 0.022 |
| 121.                  | BD | ( 1 ) | S  | 3-  | C | 32 | 810.  | RY  | ( 3 ) | C  | 27       | 0.14 | 2.01  | 0.015 |
| 121.                  | BD | ( 1 ) | S  | 3-  | C | 32 | 811.  | RY  | ( 4 ) | C  | 27       | 0.12 | 2.26  | 0.015 |
| 121.                  | BD | ( 1 ) | S  | 3-  | C | 32 | 813.  | RY  | ( 6 ) | C  | 27       | 0.09 | 2.61  | 0.014 |
| 121.                  | BD | ( 1 ) | S  | 3-  | C | 32 | 815.  | RY  | ( 8 ) | C  | 27       | 0.18 | 3.68  | 0.023 |
| 121.                  | BD | ( 1 ) | S  | 3-  | C | 32 | 817.  | RY  | (10)  | C  | 27       | 0.06 | 3.00  | 0.012 |
| 121.                  | BD | ( 1 ) | S  | 3-  | C | 32 | 834.  | RY  | ( 1 ) | H  | 28       | 0.78 | 2.21  | 0.037 |
| 122.                  | BD | ( 1 ) | S  | 3-  | C | 35 | 414.  | RY  | ( 1 ) | N  | 7        | 0.86 | 5.02  | 0.058 |
| 122.                  | BD | ( 1 ) | S  | 3-  | C | 35 | 440.  | RY  | ( 1 ) | N  | 8        | 0.50 | 4.95  | 0.045 |
| 122.                  | BD | ( 1 ) | S  | 3-  | C | 35 | 441.  | RY  | ( 2 ) | N  | 8        | 0.13 | 1.69  | 0.013 |
| 122.                  | BD | ( 1 ) | S  | 3-  | C | 35 | 443.  | RY  | ( 4 ) | N  | 8        | 0.08 | 2.92  | 0.014 |
| 122.                  | BD | ( 1 ) | S  | 3-  | C | 35 | 451.  | RY  | (12)  | N  | 8        | 0.07 | 4.18  | 0.015 |
| 122.                  | BD | ( 1 ) | S  | 3-  | C | 35 | 452.  | RY  | (13)  | N  | 8        | 0.08 | 4.09  | 0.017 |
| 122.                  | BD | ( 1 ) | S  | 3-  | C | 35 | 492.  | RY  | ( 1 ) | C  | 10       | 0.07 | 2.24  | 0.011 |
| 122.                  | BD | ( 1 ) | S  | 3-  | C | 35 | 495.  | RY  | ( 4 ) | C  | 10       | 0.09 | 2.08  | 0.012 |
| 122.                  | BD | ( 1 ) | S  | 3-  | C | 35 | 499.  | RY  | ( 8 ) | C  | 10       | 0.07 | 3.27  | 0.013 |
| 122.                  | BD | ( 1 ) | S  | 3-  | C | 35 | 518.  | RY  | ( 1 ) | H  | 11       | 0.08 | 1.92  | 0.011 |
| 122.                  | BD | ( 1 ) | S  | 3-  | C | 35 | 611.  | RY  | ( 1 ) | C  | 17       | 0.18 | 2.83  | 0.020 |
| 122.                  | BD | ( 1 ) | S  | 3-  | C | 35 | 614.  | RY  | ( 4 ) | C  | 17       | 0.21 | 3.14  | 0.023 |
| 122.                  | BD | ( 1 ) | S  | 3-  | C | 35 | 615.  | RY  | ( 5 ) | C  | 17       | 0.06 | 3.52  | 0.013 |
| 122.                  | BD | ( 1 ) | S  | 3-  | C | 35 | 616.  | RY  | ( 6 ) | C  | 17       | 0.09 | 2.91  | 0.015 |
| 122.                  | BD | ( 1 ) | S  | 3-  | C | 35 | 622.  | RY  | (12)  | C  | 17       | 0.07 | 3.80  | 0.014 |
| 122.                  | BD | ( 1 ) | S  | 3-  | C | 35 | 720.  | RY  | ( 1 ) | C  | 22       | 0.13 | 2.68  | 0.017 |
| 122.                  | BD | ( 1 ) | S  | 3-  | C | 35 | 721.  | RY  | ( 2 ) | C  | 22       | 0.07 | 2.24  | 0.011 |
| 122.                  | BD | ( 1 ) | S  | 3-  | C | 35 | 722.  | RY  | ( 3 ) | C  | 22       | 0.07 | 1.90  | 0.010 |
| 122.                  | BD | ( 1 ) | S  | 3-  | C | 35 | 723.  | RY  | ( 4 ) | C  | 22       | 0.19 | 3.03  | 0.021 |
| 122.                  | BD | ( 1 ) | S  | 3-  | C | 35 | 730.  | RY  | (11)  | C  | 22       | 0.10 | 4.07  | 0.018 |
| 122.                  | BD | ( 1 ) | S  | 3-  | C | 35 | 808.  | RY  | ( 1 ) | C  | 27       | 0.10 | 2.48  | 0.014 |
| 122.                  | BD | ( 1 ) | S  | 3-  | C | 35 | 811.  | RY  | ( 4 ) | C  | 27       | 0.10 | 2.26  | 0.014 |
| 122.                  | BD | ( 1 ) | S  | 3-  | C | 35 | 813.  | RY  | ( 6 ) | C  | 27       | 0.07 | 2.61  | 0.012 |
| 122.                  | BD | ( 1 ) | S  | 3-  | C | 35 | 815.  | RY  | ( 8 ) | C  | 27       | 0.09 | 3.68  | 0.016 |
| 122.                  | BD | ( 1 ) | S  | 3-  | C | 35 | 834.  | RY  | ( 1 ) | H  | 28       | 0.27 | 2.21  | 0.022 |
| 161.                  | BD | ( 1 ) | C  | 32- | H | 33 | 414.  | RY  | ( 1 ) | N  | 7        | 0.07 | 4.97  | 0.017 |
| 161.                  | BD | ( 1 ) | C  | 32- | H | 33 | 440.  | RY  | ( 1 ) | N  | 8        | 0.06 | 4.91  | 0.016 |
| 161.                  | BD | ( 1 ) | C  | 32- | H | 33 | 834.  | RY  | ( 1 ) | H  | 28       | 0.05 | 2.16  | 0.009 |
| 171.                  | BD | ( 1 ) | C  | 44- | H | 45 | 414.  | RY  | ( 1 ) | N  | 7        | 0.05 | 5.00  | 0.014 |
| from unit 1 to unit 3 |    |       |    |     |   |    | 240.  | BD* | ( 1 ) | Sb | 47-cl 51 | 0.70 | 0.53  | 0.017 |
| 80.                   | LP | ( 1 ) | Pt | 1   |   |    | 1059. | RY  | ( 5 ) | Sb | 47       | 0.14 | 1.70  | 0.014 |
| 80.                   | LP | ( 1 ) | Pt | 1   |   |    | 1060. | RY  | ( 6 ) | Sb | 47       | 0.11 | 1.22  | 0.010 |
| 80.                   | LP | ( 1 ) | Pt | 1   |   |    | 1061. | RY  | ( 7 ) | Sb | 47       | 0.56 | 1.66  | 0.027 |
| 80.                   | LP | ( 1 ) | Pt | 1   |   |    | 1064. | RY  | (10)  | Sb | 47       | 0.20 | 2.43  | 0.020 |
| 80.                   | LP | ( 1 ) | Pt | 1   |   |    | 1066. | RY  | (12)  | Sb | 47       | 1.26 | 1.75  | 0.042 |
| 80.                   | LP | ( 1 ) | Pt | 1   |   |    | 1067. | RY  | (13)  | Sb | 47       | 2.06 | 1.73  | 0.053 |
| 80.                   | LP | ( 1 ) | Pt | 1   |   |    | 1070. | RY  | (16)  | Sb | 47       | 2.96 | 5.07  | 0.109 |
| 80.                   | LP | ( 1 ) | Pt | 1   |   |    | 1071. | RY  | (17)  | Sb | 47       | 0.73 | 2.16  | 0.035 |
| 80.                   | LP | ( 1 ) | Pt | 1   |   |    | 1072. | RY  | (18)  | Sb | 47       | 0.11 | 2.27  | 0.014 |
| 80.                   | LP | ( 1 ) | Pt | 1   |   |    | 1075. | RY  | (21)  | Sb | 47       | 0.38 | 3.02  | 0.030 |
| 80.                   | LP | ( 1 ) | Pt | 1   |   |    | 1077. | RY  | (23)  | Sb | 47       | 0.14 | 2.13  | 0.016 |
| 80.                   | LP | ( 1 ) | Pt | 1   |   |    | 1080. | RY  | (26)  | Sb | 47       | 0.18 | 4.41  | 0.025 |
| 80.                   | LP | ( 1 ) | Pt | 1   |   |    | 1082. | RY  | (28)  | Sb | 47       | 0.07 | 2.63  | 0.012 |
| 80.                   | LP | ( 1 ) | Pt | 1   |   |    | 1083. | RY  | (29)  | Sb | 47       | 0.54 | 33.92 | 0.121 |

|                        |                         |      |       |       |
|------------------------|-------------------------|------|-------|-------|
| 80. LP (1)Pt 1         | 1084. RY (30)Sb 47      | 0.29 | 5.44  | 0.036 |
| 80. LP (1)Pt 1         | 1085. RY (31)Sb 47      | 0.21 | 2.11  | 0.019 |
| 80. LP (1)Pt 1         | 1086. RY (32)Sb 47      | 0.08 | 33.46 | 0.047 |
| 80. LP (1)Pt 1         | 1176. RY (1)Cl 51       | 0.17 | 1.77  | 0.016 |
| 80. LP (1)Pt 1         | 1177. RY (2)Cl 51       | 0.12 | 2.62  | 0.016 |
| 80. LP (1)Pt 1         | 1181. RY (6)Cl 51       | 0.23 | 1.91  | 0.019 |
| 80. LP (1)Pt 1         | 1185. RY (10)Cl 51      | 0.15 | 3.67  | 0.021 |
| 80. LP (1)Pt 1         | 1193. RY (18)Cl 51      | 0.09 | 3.28  | 0.015 |
| 81. LP (2)Pt 1         | 183. LV (2)Sb 47        | 0.10 | 0.55  | 0.007 |
| 81. LP (2)Pt 1         | 1058. RY (4)Sb 47       | 0.16 | 1.13  | 0.012 |
| 82. LP (3)Pt 1         | 240. BD* (1)Sb 47-C1 51 | 0.16 | 0.62  | 0.009 |
| 82. LP (3)Pt 1         | 1066. RY (12)Sb 47      | 0.05 | 1.83  | 0.009 |
| 82. LP (3)Pt 1         | 1067. RY (13)Sb 47      | 0.11 | 1.81  | 0.012 |
| 82. LP (3)Pt 1         | 1070. RY (16)Sb 47      | 0.18 | 5.16  | 0.027 |
| 83. LP (4)Pt 1         | 240. BD* (1)Sb 47-C1 51 | 0.21 | 0.59  | 0.010 |
| 83. LP (4)Pt 1         | 1064. RY (10)Sb 47      | 0.12 | 2.50  | 0.016 |
| 83. LP (4)Pt 1         | 1066. RY (12)Sb 47      | 0.17 | 1.81  | 0.016 |
| 83. LP (4)Pt 1         | 1067. RY (13)Sb 47      | 0.15 | 1.79  | 0.015 |
| 83. LP (4)Pt 1         | 1070. RY (16)Sb 47      | 0.09 | 5.13  | 0.020 |
| 84. LP (1) S 2         | 183. LV (2)Sb 47        | 0.05 | 0.59  | 0.005 |
| 87. LP (2) S 4         | 240. BD* (1)Sb 47-C1 51 | 0.46 | 0.39  | 0.012 |
| 87. LP (2) S 4         | 1055. RY (1)Sb 47       | 0.07 | 1.17  | 0.008 |
| 87. LP (2) S 4         | 1061. RY (7)Sb 47       | 0.05 | 1.52  | 0.008 |
| 87. LP (2) S 4         | 1064. RY (10)Sb 47      | 0.14 | 2.29  | 0.016 |
| 87. LP (2) S 4         | 1065. RY (11)Sb 47      | 0.07 | 2.54  | 0.012 |
| 87. LP (2) S 4         | 1066. RY (12)Sb 47      | 0.26 | 1.60  | 0.018 |
| 87. LP (2) S 4         | 1067. RY (13)Sb 47      | 0.32 | 1.59  | 0.020 |
| 87. LP (2) S 4         | 1070. RY (16)Sb 47      | 0.25 | 4.93  | 0.031 |
| 117. BD (1)Pt 1- S 2   | 183. LV (2)Sb 47        | 0.09 | 0.58  | 0.006 |
| 117. BD (1)Pt 1- S 2   | 240. BD* (1)Sb 47-C1 51 | 0.64 | 0.62  | 0.018 |
| 117. BD (1)Pt 1- S 2   | 1061. RY (7)Sb 47       | 0.08 | 1.75  | 0.011 |
| 117. BD (1)Pt 1- S 2   | 1066. RY (12)Sb 47      | 0.07 | 1.84  | 0.010 |
| 117. BD (1)Pt 1- S 2   | 1067. RY (13)Sb 47      | 0.09 | 1.82  | 0.011 |
| 117. BD (1)Pt 1- S 2   | 1070. RY (16)Sb 47      | 0.30 | 5.16  | 0.035 |
| 118. BD (1)Pt 1- S 3   | 182. LV (1)Sb 47        | 0.17 | 0.59  | 0.009 |
| 118. BD (1)Pt 1- S 3   | 240. BD* (1)Sb 47-C1 51 | 0.51 | 0.63  | 0.016 |
| 118. BD (1)Pt 1- S 3   | 1061. RY (7)Sb 47       | 0.10 | 1.77  | 0.012 |
| 118. BD (1)Pt 1- S 3   | 1067. RY (13)Sb 47      | 0.12 | 1.83  | 0.013 |
| 118. BD (1)Pt 1- S 3   | 1070. RY (16)Sb 47      | 0.27 | 5.17  | 0.034 |
| 119. BD (1) S 2- C 29  | 1066. RY (12)Sb 47      | 0.05 | 1.94  | 0.009 |
| 119. BD (1) S 2- C 29  | 1067. RY (13)Sb 47      | 0.05 | 1.92  | 0.009 |
| 119. BD (1) S 2- C 29  | 1070. RY (16)Sb 47      | 0.06 | 5.26  | 0.016 |
| 120. BD (1) S 2- C 44  | 1061. RY (7)Sb 47       | 0.06 | 1.87  | 0.009 |
| 120. BD (1) S 2- C 44  | 1066. RY (12)Sb 47      | 0.08 | 1.95  | 0.011 |
| 120. BD (1) S 2- C 44  | 1067. RY (13)Sb 47      | 0.08 | 1.93  | 0.011 |
| 120. BD (1) S 2- C 44  | 1070. RY (16)Sb 47      | 0.12 | 5.28  | 0.022 |
| 121. BD (1) S 3- C 32  | 1066. RY (12)Sb 47      | 0.07 | 1.95  | 0.010 |
| 121. BD (1) S 3- C 32  | 1067. RY (13)Sb 47      | 0.10 | 1.93  | 0.012 |
| 121. BD (1) S 3- C 32  | 1070. RY (16)Sb 47      | 0.08 | 5.27  | 0.018 |
| 122. BD (1) S 3- C 35  | 1070. RY (16)Sb 47      | 0.07 | 5.27  | 0.017 |
| from unit 1 to unit 4  |                         |      |       |       |
| 80. LP (1)Pt 1         | 1092. RY (1)Cl 48       | 0.57 | 1.20  | 0.023 |
| 80. LP (1)Pt 1         | 1093. RY (2)Cl 48       | 0.25 | 1.63  | 0.018 |
| 80. LP (1)Pt 1         | 1096. RY (5)Cl 48       | 0.15 | 1.73  | 0.014 |
| 80. LP (1)Pt 1         | 1097. RY (6)Cl 48       | 0.14 | 1.43  | 0.013 |
| 80. LP (1)Pt 1         | 1098. RY (7)Cl 48       | 0.79 | 2.02  | 0.036 |
| 80. LP (1)Pt 1         | 1100. RY (9)Cl 48       | 0.59 | 1.41  | 0.026 |
| 80. LP (1)Pt 1         | 1101. RY (10)Cl 48      | 0.05 | 3.22  | 0.011 |
| 80. LP (1)Pt 1         | 1118. RY (27)Cl 48      | 0.12 | 2.29  | 0.015 |
| 82. LP (3)Pt 1         | 1098. RY (7)Cl 48       | 0.07 | 2.11  | 0.011 |
| 87. LP (2) S 4         | 1092. RY (1)Cl 48       | 0.07 | 1.06  | 0.008 |
| 87. LP (2) S 4         | 1098. RY (7)Cl 48       | 0.10 | 1.88  | 0.012 |
| 87. LP (2) S 4         | 1100. RY (9)Cl 48       | 0.07 | 1.27  | 0.009 |
| from unit 1 to unit 5  |                         |      |       |       |
| 80. LP (1)Pt 1         | 1122. RY (3)Cl 49       | 0.11 | 1.20  | 0.010 |
| 80. LP (1)Pt 1         | 1123. RY (4)Cl 49       | 0.16 | 1.21  | 0.012 |
| 80. LP (1)Pt 1         | 1124. RY (5)Cl 49       | 0.13 | 2.24  | 0.015 |
| 80. LP (1)Pt 1         | 1126. RY (7)Cl 49       | 0.08 | 1.68  | 0.010 |
| 80. LP (1)Pt 1         | 1127. RY (8)Cl 49       | 0.25 | 2.90  | 0.024 |
| 80. LP (1)Pt 1         | 1134. RY (15)Cl 49      | 0.07 | 3.85  | 0.014 |
| 80. LP (1)Pt 1         | 1135. RY (16)Cl 49      | 0.07 | 3.30  | 0.013 |
| 80. LP (1)Pt 1         | 1136. RY (17)Cl 49      | 0.06 | 3.24  | 0.013 |
| 84. LP (1) S 2         | 1128. RY (9)Cl 49       | 0.15 | 1.60  | 0.014 |
| 161. BD (1) C 32- H 33 | 1123. RY (4)Cl 49       | 0.06 | 1.37  | 0.008 |
| 161. BD (1) C 32- H 33 | 1125. RY (6)Cl 49       | 0.07 | 1.59  | 0.009 |
| from unit 1 to unit 6  |                         |      |       |       |
| 80. LP (1)Pt 1         | 1148. RY (1)Cl 50       | 0.66 | 1.22  | 0.025 |
| 80. LP (1)Pt 1         | 1151. RY (4)Cl 50       | 0.23 | 1.22  | 0.015 |
| 80. LP (1)Pt 1         | 1153. RY (6)Cl 50       | 0.63 | 1.63  | 0.029 |
| 80. LP (1)Pt 1         | 1154. RY (7)Cl 50       | 1.41 | 1.72  | 0.044 |
| 80. LP (1)Pt 1         | 1155. RY (8)Cl 50       | 1.51 | 2.64  | 0.056 |
| 80. LP (1)Pt 1         | 1156. RY (9)Cl 50       | 0.84 | 1.79  | 0.035 |
| 80. LP (1)Pt 1         | 1158. RY (11)Cl 50      | 0.08 | 3.40  | 0.015 |
| 80. LP (1)Pt 1         | 1163. RY (16)Cl 50      | 0.10 | 2.62  | 0.014 |
| 80. LP (1)Pt 1         | 1166. RY (19)Cl 50      | 0.12 | 2.81  | 0.016 |
| 82. LP (3)Pt 1         | 1153. RY (6)Cl 50       | 0.08 | 1.71  | 0.011 |
| 82. LP (3)Pt 1         | 1154. RY (7)Cl 50       | 0.06 | 1.80  | 0.009 |
| 82. LP (3)Pt 1         | 1155. RY (8)Cl 50       | 0.08 | 2.72  | 0.013 |
| 82. LP (3)Pt 1         | 1156. RY (9)Cl 50       | 0.05 | 1.88  | 0.009 |
| 83. LP (4)Pt 1         | 1154. RY (7)Cl 50       | 0.08 | 1.78  | 0.010 |
| 83. LP (4)Pt 1         | 1155. RY (8)Cl 50       | 0.09 | 2.70  | 0.014 |
| 83. LP (4)Pt 1         | 1156. RY (9)Cl 50       | 0.07 | 1.85  | 0.010 |
| 85. LP (1) S 3         | 1156. RY (9)Cl 50       | 0.09 | 1.89  | 0.012 |
| 87. LP (2) S 4         | 1148. RY (1)Cl 50       | 0.07 | 1.08  | 0.008 |
| 87. LP (2) S 4         | 1153. RY (6)Cl 50       | 0.09 | 1.49  | 0.010 |
| 87. LP (2) S 4         | 1154. RY (7)Cl 50       | 0.17 | 1.57  | 0.014 |
| 87. LP (2) S 4         | 1155. RY (8)Cl 50       | 0.15 | 2.49  | 0.017 |
| 117. BD (1)Pt 1- S 2   | 1154. RY (7)Cl 50       | 0.06 | 1.81  | 0.009 |
| 117. BD (1)Pt 1- S 2   | 1155. RY (8)Cl 50       | 0.05 | 2.73  | 0.011 |
| 118. BD (1)Pt 1- S 3   | 1148. RY (1)Cl 50       | 0.08 | 1.32  | 0.009 |

|                        |                       |       |        |       |
|------------------------|-----------------------|-------|--------|-------|
| 118. BD (1)Pt 1- S 3   | 1154. RY (7)C1 50     | 0.09  | 1.82   | 0.011 |
| 118. BD (1)Pt 1- S 3   | 1155. RY (8)C1 50     | 0.10  | 2.74   | 0.015 |
| 118. BD (1)Pt 1- S 3   | 1156. RY (9)C1 50     | 0.12  | 1.89   | 0.013 |
| 161. BD (1) C 32- H 33 | 1153. RY (6)C1 50     | 0.07  | 1.78   | 0.010 |
| from unit 1 to unit 7  |                       |       |        |       |
| 80. LP (1)Pt 1         | 1204. RY (1)C1 52     | 0.57  | 1.25   | 0.024 |
| 80. LP (1)Pt 1         | 1205. RY (2)C1 52     | 0.94  | 1.93   | 0.038 |
| 80. LP (1)Pt 1         | 1206. RY (3)C1 52     | 0.11  | 1.21   | 0.010 |
| 80. LP (1)Pt 1         | 1207. RY (4)C1 52     | 0.07  | 1.20   | 0.008 |
| 80. LP (1)Pt 1         | 1208. RY (5)C1 52     | 0.26  | 2.67   | 0.024 |
| 80. LP (1)Pt 1         | 1209. RY (6)C1 52     | 0.11  | 1.53   | 0.012 |
| 80. LP (1)Pt 1         | 1210. RY (7)C1 52     | 0.19  | 2.37   | 0.019 |
| 80. LP (1)Pt 1         | 1214. RY (11)C1 52    | 0.09  | 4.41   | 0.018 |
| 80. LP (1)Pt 1         | 1216. RY (13)C1 52    | 0.09  | 3.59   | 0.016 |
| 80. LP (1)Pt 1         | 1231. RY (28)C1 52    | 0.12  | 2.78   | 0.016 |
| 82. LP (3)Pt 1         | 1205. RY (2)C1 52     | 0.06  | 2.01   | 0.010 |
| 87. LP (2) S 4         | 1204. RY (1)C1 52     | 0.07  | 1.11   | 0.008 |
| 87. LP (2) S 4         | 1205. RY (2)C1 52     | 0.10  | 1.79   | 0.012 |
| from unit 1 to unit 8  |                       |       |        |       |
| 80. LP (1)Pt 1         | 1233. RY (2) N 53     | 0.16  | 1.31   | 0.013 |
| 80. LP (1)Pt 1         | 1234. RY (3) N 53     | 0.09  | 1.33   | 0.010 |
| 80. LP (1)Pt 1         | 1239. RY (8) N 53     | 0.07  | 2.31   | 0.012 |
| 80. LP (1)Pt 1         | 1262. RY (5) C 54     | 0.06  | 3.20   | 0.012 |
| 80. LP (1)Pt 1         | 1264. RY (7) C 54     | 0.07  | 2.29   | 0.011 |
| 80. LP (1)Pt 1         | 1284. RY (1) C 55     | 0.09  | 1.43   | 0.010 |
| 80. LP (1)Pt 1         | 1287. RY (4) C 55     | 0.14  | 1.73   | 0.014 |
| 80. LP (1)Pt 1         | 1291. RY (8) C 55     | 0.05  | 2.81   | 0.011 |
| from unit 2 to unit 1  |                       |       |        |       |
| 92. LP (1) N 7         | 184. BD*(1)Pt 1- S 2  | 3.72  | 0.61   | 0.042 |
| 92. LP (1) N 7         | 185. BD*(1)Pt 1- S 3  | 73.14 | 0.61   | 0.189 |
| 92. LP (1) N 7         | 186. BD*(1) S 2- C 29 | 0.06  | 0.54   | 0.005 |
| 92. LP (1) N 7         | 248. RY (1)Pt 1       | 5.17  | 2.39   | 0.099 |
| 92. LP (1) N 7         | 249. RY (2)Pt 1       | 8.67  | 2.97   | 0.143 |
| 92. LP (1) N 7         | 250. RY (3)Pt 1       | 1.87  | 3.02   | 0.067 |
| 92. LP (1) N 7         | 251. RY (4)Pt 1       | 0.11  | 2.46   | 0.015 |
| 92. LP (1) N 7         | 252. RY (5)Pt 1       | 7.10  | 2.93   | 0.129 |
| 92. LP (1) N 7         | 253. RY (6)Pt 1       | 0.40  | 3.38   | 0.033 |
| 92. LP (1) N 7         | 255. RY (8)Pt 1       | 9.05  | 2.85   | 0.143 |
| 92. LP (1) N 7         | 256. RY (9)Pt 1       | 5.96  | 2.93   | 0.118 |
| 92. LP (1) N 7         | 257. RY (10)Pt 1      | 10.19 | 4.71   | 0.196 |
| 92. LP (1) N 7         | 258. RY (11)Pt 1      | 3.46  | 3.04   | 0.092 |
| 92. LP (1) N 7         | 259. RY (12)Pt 1      | 2.51  | 3.02   | 0.078 |
| 92. LP (1) N 7         | 260. RY (13)Pt 1      | 8.69  | 7.61   | 0.230 |
| 92. LP (1) N 7         | 261. RY (14)Pt 1      | 0.32  | 2.57   | 0.026 |
| 92. LP (1) N 7         | 262. RY (15)Pt 1      | 6.85  | 3.41   | 0.136 |
| 92. LP (1) N 7         | 263. RY (16)Pt 1      | 4.51  | 3.21   | 0.107 |
| 92. LP (1) N 7         | 265. RY (18)Pt 1      | 2.48  | 3.94   | 0.088 |
| 92. LP (1) N 7         | 266. RY (19)Pt 1      | 2.10  | 3.91   | 0.081 |
| 92. LP (1) N 7         | 267. RY (20)Pt 1      | 4.47  | 4.42   | 0.125 |
| 92. LP (1) N 7         | 268. RY (21)Pt 1      | 0.17  | 3.00   | 0.020 |
| 92. LP (1) N 7         | 269. RY (22)Pt 1      | 0.56  | 2.51   | 0.033 |
| 92. LP (1) N 7         | 270. RY (23)Pt 1      | 0.51  | 2.40   | 0.031 |
| 92. LP (1) N 7         | 271. RY (24)Pt 1      | 5.17  | 5.16   | 0.146 |
| 92. LP (1) N 7         | 272. RY (25)Pt 1      | 0.41  | 2.55   | 0.029 |
| 92. LP (1) N 7         | 273. RY (26)Pt 1      | 13.42 | 37.26  | 0.631 |
| 92. LP (1) N 7         | 274. RY (27)Pt 1      | 0.41  | 27.52  | 0.095 |
| 92. LP (1) N 7         | 276. RY (29)Pt 1      | 4.23  | 236.96 | 0.894 |
| 92. LP (1) N 7         | 278. RY (1) S 2       | 0.16  | 1.34   | 0.013 |
| 92. LP (1) N 7         | 279. RY (2) S 2       | 2.49  | 1.64   | 0.057 |
| 92. LP (1) N 7         | 280. RY (3) S 2       | 0.37  | 1.32   | 0.020 |
| 92. LP (1) N 7         | 281. RY (4) S 2       | 3.56  | 1.89   | 0.073 |
| 92. LP (1) N 7         | 282. RY (5) S 2       | 9.30  | 5.35   | 0.199 |
| 92. LP (1) N 7         | 283. RY (6) S 2       | 4.69  | 2.05   | 0.087 |
| 92. LP (1) N 7         | 284. RY (7) S 2       | 1.29  | 2.13   | 0.047 |
| 92. LP (1) N 7         | 285. RY (8) S 2       | 1.17  | 2.23   | 0.046 |
| 92. LP (1) N 7         | 286. RY (9) S 2       | 1.49  | 2.52   | 0.055 |
| 92. LP (1) N 7         | 287. RY (10) S 2      | 0.48  | 2.34   | 0.030 |
| 92. LP (1) N 7         | 289. RY (12) S 2      | 0.67  | 3.38   | 0.042 |
| 92. LP (1) N 7         | 292. RY (15) S 2      | 0.20  | 2.57   | 0.020 |
| 92. LP (1) N 7         | 293. RY (16) S 2      | 0.94  | 3.31   | 0.050 |
| 92. LP (1) N 7         | 294. RY (17) S 2      | 0.71  | 3.42   | 0.044 |
| 92. LP (1) N 7         | 295. RY (18) S 2      | 0.11  | 3.55   | 0.018 |
| 92. LP (1) N 7         | 297. RY (20) S 2      | 1.29  | 3.87   | 0.063 |
| 92. LP (1) N 7         | 298. RY (21) S 2      | 0.18  | 3.16   | 0.021 |
| 92. LP (1) N 7         | 299. RY (22) S 2      | 2.58  | 4.73   | 0.099 |
| 92. LP (1) N 7         | 300. RY (23) S 2      | 0.23  | 2.92   | 0.023 |
| 92. LP (1) N 7         | 304. RY (27) S 2      | 0.09  | 7.14   | 0.023 |
| 92. LP (1) N 7         | 306. RY (1) S 3       | 0.12  | 1.43   | 0.012 |
| 92. LP (1) N 7         | 307. RY (2) S 3       | 0.74  | 1.37   | 0.028 |
| 92. LP (1) N 7         | 308. RY (3) S 3       | 0.19  | 1.37   | 0.015 |
| 92. LP (1) N 7         | 309. RY (4) S 3       | 3.74  | 1.77   | 0.073 |
| 92. LP (1) N 7         | 310. RY (5) S 3       | 7.39  | 3.97   | 0.153 |
| 92. LP (1) N 7         | 311. RY (6) S 3       | 10.60 | 4.09   | 0.186 |
| 92. LP (1) N 7         | 312. RY (7) S 3       | 2.08  | 2.30   | 0.062 |
| 92. LP (1) N 7         | 313. RY (8) S 3       | 0.66  | 2.06   | 0.033 |
| 92. LP (1) N 7         | 314. RY (9) S 3       | 0.75  | 2.32   | 0.037 |
| 92. LP (1) N 7         | 315. RY (10) S 3      | 0.78  | 2.37   | 0.038 |
| 92. LP (1) N 7         | 317. RY (12) S 3      | 1.00  | 3.37   | 0.052 |
| 92. LP (1) N 7         | 318. RY (13) S 3      | 0.07  | 2.66   | 0.012 |
| 92. LP (1) N 7         | 321. RY (16) S 3      | 0.18  | 3.34   | 0.022 |
| 92. LP (1) N 7         | 322. RY (17) S 3      | 1.65  | 3.87   | 0.071 |
| 92. LP (1) N 7         | 323. RY (18) S 3      | 0.81  | 3.43   | 0.047 |
| 92. LP (1) N 7         | 325. RY (20) S 3      | 2.15  | 3.91   | 0.082 |
| 92. LP (1) N 7         | 326. RY (21) S 3      | 0.40  | 3.36   | 0.033 |
| 92. LP (1) N 7         | 327. RY (22) S 3      | 2.36  | 3.30   | 0.079 |
| 92. LP (1) N 7         | 328. RY (23) S 3      | 0.23  | 2.96   | 0.024 |
| 92. LP (1) N 7         | 332. RY (27) S 3      | 0.18  | 11.60  | 0.041 |
| 92. LP (1) N 7         | 334. RY (1) S 4       | 1.16  | 1.42   | 0.036 |
| 92. LP (1) N 7         | 335. RY (2) S 4       | 0.32  | 1.46   | 0.019 |
| 92. LP (1) N 7         | 340. RY (7) S 4       | 0.20  | 1.69   | 0.016 |

|                 |                         |       |      |       |
|-----------------|-------------------------|-------|------|-------|
| 92. LP ( 1) N 7 | 341. RY ( 8) S 4        | 0.37  | 1.95 | 0.024 |
| 92. LP ( 1) N 7 | 342. RY ( 9) S 4        | 0.29  | 2.08 | 0.022 |
| 92. LP ( 1) N 7 | 348. RY (15) S 4        | 0.43  | 2.69 | 0.031 |
| 92. LP ( 1) N 7 | 349. RY (16) S 4        | 0.13  | 2.87 | 0.017 |
| 92. LP ( 1) N 7 | 350. RY (17) S 4        | 0.40  | 3.12 | 0.031 |
| 92. LP ( 1) N 7 | 353. RY (20) S 4        | 0.06  | 3.93 | 0.014 |
| 92. LP ( 1) N 7 | 356. RY (23) S 4        | 0.15  | 3.71 | 0.021 |
| 92. LP ( 1) N 7 | 357. RY (24) S 4        | 0.18  | 3.89 | 0.023 |
| 92. LP ( 1) N 7 | 839. RY ( 1) C 29       | 0.31  | 1.80 | 0.021 |
| 92. LP ( 1) N 7 | 840. RY ( 2) C 29       | 1.81  | 1.56 | 0.047 |
| 92. LP ( 1) N 7 | 842. RY ( 4) C 29       | 1.32  | 2.12 | 0.047 |
| 92. LP ( 1) N 7 | 843. RY ( 5) C 29       | 0.85  | 2.29 | 0.039 |
| 92. LP ( 1) N 7 | 844. RY ( 6) C 29       | 0.05  | 2.48 | 0.010 |
| 92. LP ( 1) N 7 | 845. RY ( 7) C 29       | 0.19  | 1.73 | 0.016 |
| 92. LP ( 1) N 7 | 847. RY ( 9) C 29       | 0.06  | 3.08 | 0.012 |
| 92. LP ( 1) N 7 | 849. RY (11) C 29       | 0.38  | 2.47 | 0.027 |
| 92. LP ( 1) N 7 | 850. RY (12) C 29       | 0.59  | 3.45 | 0.040 |
| 92. LP ( 1) N 7 | 851. RY (13) C 29       | 0.26  | 3.22 | 0.026 |
| 92. LP ( 1) N 7 | 853. RY (15) C 29       | 0.09  | 3.36 | 0.016 |
| 92. LP ( 1) N 7 | 855. RY (17) C 29       | 0.08  | 3.71 | 0.015 |
| 92. LP ( 1) N 7 | 858. RY (20) C 29       | 0.06  | 3.71 | 0.014 |
| 92. LP ( 1) N 7 | 867. RY ( 3) H 30       | 0.07  | 2.68 | 0.012 |
| 92. LP ( 1) N 7 | 870. RY ( 1) H 31       | 0.08  | 1.79 | 0.011 |
| 92. LP ( 1) N 7 | 874. RY ( 5) H 31       | 0.07  | 3.18 | 0.013 |
| 92. LP ( 1) N 7 | 875. RY ( 1) C 32       | 1.53  | 1.75 | 0.046 |
| 92. LP ( 1) N 7 | 878. RY ( 4) C 32       | 1.29  | 2.18 | 0.047 |
| 92. LP ( 1) N 7 | 880. RY ( 6) C 32       | 0.40  | 1.89 | 0.025 |
| 92. LP ( 1) N 7 | 881. RY ( 7) C 32       | 0.41  | 2.03 | 0.026 |
| 92. LP ( 1) N 7 | 882. RY ( 8) C 32       | 0.12  | 2.74 | 0.016 |
| 92. LP ( 1) N 7 | 883. RY ( 9) C 32       | 0.22  | 3.04 | 0.023 |
| 92. LP ( 1) N 7 | 884. RY (10) C 32       | 0.05  | 2.79 | 0.011 |
| 92. LP ( 1) N 7 | 885. RY (11) C 32       | 0.76  | 2.66 | 0.040 |
| 92. LP ( 1) N 7 | 886. RY (12) C 32       | 0.12  | 3.35 | 0.018 |
| 92. LP ( 1) N 7 | 887. RY (13) C 32       | 0.13  | 3.46 | 0.019 |
| 92. LP ( 1) N 7 | 889. RY (15) C 32       | 0.42  | 4.27 | 0.038 |
| 92. LP ( 1) N 7 | 901. RY ( 1) H 33       | 0.15  | 1.94 | 0.015 |
| 92. LP ( 1) N 7 | 902. RY ( 2) H 33       | 0.20  | 2.54 | 0.020 |
| 92. LP ( 1) N 7 | 905. RY ( 5) H 33       | 0.11  | 2.85 | 0.016 |
| 92. LP ( 1) N 7 | 911. RY ( 1) C 35       | 1.85  | 1.69 | 0.050 |
| 92. LP ( 1) N 7 | 912. RY ( 2) C 35       | 0.47  | 2.20 | 0.029 |
| 92. LP ( 1) N 7 | 913. RY ( 3) C 35       | 0.05  | 1.72 | 0.008 |
| 92. LP ( 1) N 7 | 914. RY ( 4) C 35       | 2.05  | 2.18 | 0.060 |
| 92. LP ( 1) N 7 | 915. RY ( 5) C 35       | 0.56  | 2.20 | 0.031 |
| 92. LP ( 1) N 7 | 917. RY ( 7) C 35       | 0.22  | 2.09 | 0.019 |
| 92. LP ( 1) N 7 | 918. RY ( 8) C 35       | 0.46  | 2.38 | 0.030 |
| 92. LP ( 1) N 7 | 919. RY ( 9) C 35       | 0.06  | 3.37 | 0.012 |
| 92. LP ( 1) N 7 | 920. RY (10) C 35       | 0.24  | 2.47 | 0.022 |
| 92. LP ( 1) N 7 | 921. RY (11) C 35       | 0.53  | 2.71 | 0.034 |
| 92. LP ( 1) N 7 | 922. RY (12) C 35       | 0.05  | 4.01 | 0.013 |
| 92. LP ( 1) N 7 | 923. RY (13) C 35       | 0.71  | 4.09 | 0.048 |
| 92. LP ( 1) N 7 | 924. RY (14) C 35       | 0.11  | 4.54 | 0.020 |
| 92. LP ( 1) N 7 | 927. RY (17) C 35       | 0.07  | 3.39 | 0.014 |
| 92. LP ( 1) N 7 | 928. RY (18) C 35       | 0.12  | 3.86 | 0.019 |
| 92. LP ( 1) N 7 | 933. RY (23) C 35       | 0.05  | 3.90 | 0.013 |
| 92. LP ( 1) N 7 | 937. RY ( 1) H 36       | 0.09  | 1.61 | 0.011 |
| 92. LP ( 1) N 7 | 942. RY ( 1) H 37       | 0.19  | 1.71 | 0.016 |
| 92. LP ( 1) N 7 | 945. RY ( 4) H 37       | 0.08  | 3.11 | 0.014 |
| 92. LP ( 1) N 7 | 948. RY ( 2) C 38       | 0.30  | 1.96 | 0.022 |
| 92. LP ( 1) N 7 | 950. RY ( 4) C 38       | 0.09  | 1.69 | 0.011 |
| 92. LP ( 1) N 7 | 952. RY ( 6) C 38       | 0.74  | 2.02 | 0.034 |
| 92. LP ( 1) N 7 | 957. RY (11) C 38       | 0.08  | 2.95 | 0.013 |
| 92. LP ( 1) N 7 | 959. RY (13) C 38       | 0.46  | 2.85 | 0.032 |
| 92. LP ( 1) N 7 | 962. RY (16) C 38       | 0.12  | 3.10 | 0.017 |
| 92. LP ( 1) N 7 | 973. RY ( 1) H 39       | 0.75  | 1.72 | 0.032 |
| 92. LP ( 1) N 7 | 975. RY ( 3) H 39       | 0.26  | 2.94 | 0.025 |
| 92. LP ( 1) N 7 | 978. RY ( 1) H 40       | 0.08  | 1.78 | 0.011 |
| 92. LP ( 1) N 7 | 988. RY ( 6) C 41       | 0.50  | 2.39 | 0.031 |
| 92. LP ( 1) N 7 | 989. RY ( 7) C 41       | 0.18  | 1.94 | 0.017 |
| 92. LP ( 1) N 7 | 991. RY ( 9) C 41       | 0.28  | 2.83 | 0.025 |
| 92. LP ( 1) N 7 | 992. RY (10) C 41       | 0.07  | 3.90 | 0.015 |
| 92. LP ( 1) N 7 | 993. RY (11) C 41       | 0.23  | 3.10 | 0.024 |
| 92. LP ( 1) N 7 | 996. RY (14) C 41       | 0.14  | 3.25 | 0.019 |
| 92. LP ( 1) N 7 | 998. RY (16) C 41       | 0.08  | 3.63 | 0.015 |
| 92. LP ( 1) N 7 | 1009. RY ( 1) H 42      | 0.13  | 1.47 | 0.012 |
| 92. LP ( 1) N 7 | 1019. RY ( 1) C 44      | 0.73  | 1.68 | 0.031 |
| 92. LP ( 1) N 7 | 1020. RY ( 2) C 44      | 0.30  | 2.08 | 0.022 |
| 92. LP ( 1) N 7 | 1021. RY ( 3) C 44      | 0.12  | 1.85 | 0.014 |
| 92. LP ( 1) N 7 | 1022. RY ( 4) C 44      | 1.87  | 2.09 | 0.056 |
| 92. LP ( 1) N 7 | 1024. RY ( 6) C 44      | 0.36  | 2.14 | 0.025 |
| 92. LP ( 1) N 7 | 1025. RY ( 7) C 44      | 0.09  | 2.63 | 0.014 |
| 92. LP ( 1) N 7 | 1027. RY ( 9) C 44      | 0.38  | 2.68 | 0.028 |
| 92. LP ( 1) N 7 | 1028. RY (10) C 44      | 0.14  | 3.17 | 0.019 |
| 92. LP ( 1) N 7 | 1029. RY (11) C 44      | 1.00  | 2.88 | 0.048 |
| 92. LP ( 1) N 7 | 1030. RY (12) C 44      | 0.08  | 3.21 | 0.014 |
| 92. LP ( 1) N 7 | 1031. RY (13) C 44      | 0.35  | 4.68 | 0.036 |
| 92. LP ( 1) N 7 | 1032. RY (14) C 44      | 0.06  | 3.21 | 0.012 |
| 92. LP ( 1) N 7 | 1034. RY (16) C 44      | 0.12  | 4.31 | 0.020 |
| 92. LP ( 1) N 7 | 1036. RY (18) C 44      | 0.09  | 4.05 | 0.017 |
| 92. LP ( 1) N 7 | 1045. RY ( 1) H 45      | 0.43  | 1.75 | 0.024 |
| 92. LP ( 1) N 7 | 1046. RY ( 2) H 45      | 0.11  | 2.82 | 0.016 |
| 92. LP ( 1) N 7 | 1048. RY ( 4) H 45      | 0.09  | 3.00 | 0.015 |
| 92. LP ( 1) N 7 | 1050. RY ( 1) H 46      | 0.26  | 1.65 | 0.018 |
| 92. LP ( 1) N 7 | 1053. RY ( 4) H 46      | 0.06  | 2.77 | 0.011 |
| 93. LP ( 1) N 8 | 184. BD* ( 1) Pt 1- S 2 | 78.43 | 0.60 | 0.194 |
| 93. LP ( 1) N 8 | 185. BD* ( 1) Pt 1- S 3 | 3.81  | 0.61 | 0.043 |
| 93. LP ( 1) N 8 | 248. RY ( 1) Pt 1       | 7.18  | 2.38 | 0.117 |
| 93. LP ( 1) N 8 | 249. RY ( 2) Pt 1       | 10.22 | 2.97 | 0.156 |
| 93. LP ( 1) N 8 | 250. RY ( 3) Pt 1       | 2.30  | 3.02 | 0.074 |
| 93. LP ( 1) N 8 | 252. RY ( 5) Pt 1       | 6.92  | 2.92 | 0.127 |
| 93. LP ( 1) N 8 | 253. RY ( 6) Pt 1       | 2.02  | 3.38 | 0.074 |
| 93. LP ( 1) N 8 | 254. RY ( 7) Pt 1       | 0.95  | 2.23 | 0.041 |
| 93. LP ( 1) N 8 | 255. RY ( 8) Pt 1       | 7.41  | 2.84 | 0.130 |
| 93. LP ( 1) N 8 | 256. RY ( 9) Pt 1       | 3.65  | 2.93 | 0.092 |

|                 |                   |       |        |       |
|-----------------|-------------------|-------|--------|-------|
| 93. LP ( 1) N 8 | 257. RY (10) Pt 1 | 14.16 | 4.71   | 0.230 |
| 93. LP ( 1) N 8 | 258. RY (11) Pt 1 | 2.06  | 3.04   | 0.071 |
| 93. LP ( 1) N 8 | 259. RY (12) Pt 1 | 4.69  | 3.02   | 0.106 |
| 93. LP ( 1) N 8 | 260. RY (13) Pt 1 | 9.55  | 7.60   | 0.241 |
| 93. LP ( 1) N 8 | 261. RY (14) Pt 1 | 1.74  | 2.57   | 0.060 |
| 93. LP ( 1) N 8 | 262. RY (15) Pt 1 | 6.35  | 3.40   | 0.131 |
| 93. LP ( 1) N 8 | 263. RY (16) Pt 1 | 5.22  | 3.20   | 0.115 |
| 93. LP ( 1) N 8 | 264. RY (17) Pt 1 | 1.40  | 2.70   | 0.055 |
| 93. LP ( 1) N 8 | 265. RY (18) Pt 1 | 3.72  | 3.93   | 0.108 |
| 93. LP ( 1) N 8 | 266. RY (19) Pt 1 | 2.47  | 3.90   | 0.088 |
| 93. LP ( 1) N 8 | 267. RY (20) Pt 1 | 3.97  | 4.42   | 0.118 |
| 93. LP ( 1) N 8 | 268. RY (21) Pt 1 | 0.43  | 2.99   | 0.032 |
| 93. LP ( 1) N 8 | 269. RY (22) Pt 1 | 0.59  | 2.50   | 0.034 |
| 93. LP ( 1) N 8 | 270. RY (23) Pt 1 | 1.03  | 2.39   | 0.044 |
| 93. LP ( 1) N 8 | 271. RY (24) Pt 1 | 5.83  | 5.16   | 0.155 |
| 93. LP ( 1) N 8 | 272. RY (25) Pt 1 | 0.97  | 2.54   | 0.044 |
| 93. LP ( 1) N 8 | 273. RY (26) Pt 1 | 15.00 | 37.26  | 0.667 |
| 93. LP ( 1) N 8 | 274. RY (27) Pt 1 | 0.41  | 27.51  | 0.095 |
| 93. LP ( 1) N 8 | 276. RY (29) Pt 1 | 4.76  | 236.96 | 0.948 |
| 93. LP ( 1) N 8 | 278. RY ( 1) S 2  | 0.21  | 1.34   | 0.015 |
| 93. LP ( 1) N 8 | 279. RY ( 2) S 2  | 1.73  | 1.63   | 0.047 |
| 93. LP ( 1) N 8 | 280. RY ( 3) S 2  | 0.39  | 1.32   | 0.020 |
| 93. LP ( 1) N 8 | 281. RY ( 4) S 2  | 5.95  | 1.89   | 0.095 |
| 93. LP ( 1) N 8 | 282. RY ( 5) S 2  | 10.25 | 5.35   | 0.209 |
| 93. LP ( 1) N 8 | 283. RY ( 6) S 2  | 6.76  | 2.04   | 0.105 |
| 93. LP ( 1) N 8 | 284. RY ( 7) S 2  | 1.92  | 2.12   | 0.057 |
| 93. LP ( 1) N 8 | 285. RY ( 8) S 2  | 2.22  | 2.23   | 0.063 |
| 93. LP ( 1) N 8 | 286. RY ( 9) S 2  | 1.91  | 2.52   | 0.062 |
| 93. LP ( 1) N 8 | 287. RY (10) S 2  | 0.65  | 2.33   | 0.035 |
| 93. LP ( 1) N 8 | 289. RY (12) S 2  | 0.98  | 3.37   | 0.051 |
| 93. LP ( 1) N 8 | 292. RY (15) S 2  | 0.35  | 2.57   | 0.027 |
| 93. LP ( 1) N 8 | 293. RY (16) S 2  | 0.82  | 3.31   | 0.047 |
| 93. LP ( 1) N 8 | 294. RY (17) S 2  | 1.20  | 3.42   | 0.057 |
| 93. LP ( 1) N 8 | 295. RY (18) S 2  | 0.19  | 3.55   | 0.023 |
| 93. LP ( 1) N 8 | 297. RY (20) S 2  | 1.71  | 3.87   | 0.073 |
| 93. LP ( 1) N 8 | 298. RY (21) S 2  | 0.16  | 3.15   | 0.020 |
| 93. LP ( 1) N 8 | 299. RY (22) S 2  | 3.05  | 4.73   | 0.107 |
| 93. LP ( 1) N 8 | 300. RY (23) S 2  | 0.24  | 2.91   | 0.024 |
| 93. LP ( 1) N 8 | 304. RY (27) S 2  | 0.11  | 7.13   | 0.025 |
| 93. LP ( 1) N 8 | 306. RY ( 1) S 3  | 0.07  | 1.43   | 0.009 |
| 93. LP ( 1) N 8 | 307. RY ( 2) S 3  | 1.75  | 1.36   | 0.044 |
| 93. LP ( 1) N 8 | 308. RY ( 3) S 3  | 0.70  | 1.37   | 0.028 |
| 93. LP ( 1) N 8 | 309. RY ( 4) S 3  | 3.51  | 1.77   | 0.070 |
| 93. LP ( 1) N 8 | 310. RY ( 5) S 3  | 9.20  | 3.97   | 0.171 |
| 93. LP ( 1) N 8 | 311. RY ( 6) S 3  | 10.23 | 4.09   | 0.183 |
| 93. LP ( 1) N 8 | 312. RY ( 7) S 3  | 1.97  | 2.29   | 0.060 |
| 93. LP ( 1) N 8 | 313. RY ( 8) S 3  | 0.29  | 2.06   | 0.022 |
| 93. LP ( 1) N 8 | 314. RY ( 9) S 3  | 0.71  | 2.32   | 0.036 |
| 93. LP ( 1) N 8 | 315. RY (10) S 3  | 0.76  | 2.37   | 0.038 |
| 93. LP ( 1) N 8 | 317. RY (12) S 3  | 0.90  | 3.37   | 0.049 |
| 93. LP ( 1) N 8 | 318. RY (13) S 3  | 0.20  | 2.65   | 0.020 |
| 93. LP ( 1) N 8 | 321. RY (16) S 3  | 0.12  | 3.33   | 0.018 |
| 93. LP ( 1) N 8 | 322. RY (17) S 3  | 1.52  | 3.87   | 0.069 |
| 93. LP ( 1) N 8 | 323. RY (18) S 3  | 1.09  | 3.42   | 0.055 |
| 93. LP ( 1) N 8 | 325. RY (20) S 3  | 2.24  | 3.91   | 0.083 |
| 93. LP ( 1) N 8 | 326. RY (21) S 3  | 0.53  | 3.36   | 0.038 |
| 93. LP ( 1) N 8 | 327. RY (22) S 3  | 2.44  | 3.29   | 0.080 |
| 93. LP ( 1) N 8 | 328. RY (23) S 3  | 0.31  | 2.96   | 0.027 |
| 93. LP ( 1) N 8 | 329. RY (24) S 3  | 0.15  | 7.18   | 0.029 |
| 93. LP ( 1) N 8 | 334. RY ( 1) S 4  | 1.56  | 1.42   | 0.042 |
| 93. LP ( 1) N 8 | 335. RY ( 2) S 4  | 0.34  | 1.45   | 0.020 |
| 93. LP ( 1) N 8 | 340. RY ( 7) S 4  | 0.13  | 1.69   | 0.013 |
| 93. LP ( 1) N 8 | 341. RY ( 8) S 4  | 0.56  | 1.95   | 0.029 |
| 93. LP ( 1) N 8 | 342. RY ( 9) S 4  | 0.32  | 2.08   | 0.023 |
| 93. LP ( 1) N 8 | 348. RY (15) S 4  | 0.50  | 2.69   | 0.033 |
| 93. LP ( 1) N 8 | 349. RY (16) S 4  | 0.09  | 2.87   | 0.014 |
| 93. LP ( 1) N 8 | 350. RY (17) S 4  | 0.53  | 3.11   | 0.036 |
| 93. LP ( 1) N 8 | 353. RY (20) S 4  | 0.06  | 3.93   | 0.014 |
| 93. LP ( 1) N 8 | 356. RY (23) S 4  | 0.18  | 3.71   | 0.023 |
| 93. LP ( 1) N 8 | 357. RY (24) S 4  | 0.21  | 3.89   | 0.026 |
| 93. LP ( 1) N 8 | 839. RY ( 1) C 29 | 0.39  | 1.80   | 0.024 |
| 93. LP ( 1) N 8 | 840. RY ( 2) C 29 | 2.23  | 1.56   | 0.053 |
| 93. LP ( 1) N 8 | 842. RY ( 4) C 29 | 1.30  | 2.11   | 0.047 |
| 93. LP ( 1) N 8 | 843. RY ( 5) C 29 | 1.19  | 2.29   | 0.047 |
| 93. LP ( 1) N 8 | 844. RY ( 6) C 29 | 0.08  | 2.48   | 0.013 |
| 93. LP ( 1) N 8 | 845. RY ( 7) C 29 | 0.19  | 1.72   | 0.016 |
| 93. LP ( 1) N 8 | 847. RY ( 9) C 29 | 0.06  | 3.08   | 0.012 |
| 93. LP ( 1) N 8 | 849. RY (11) C 29 | 0.45  | 2.47   | 0.030 |
| 93. LP ( 1) N 8 | 850. RY (12) C 29 | 0.77  | 3.45   | 0.046 |
| 93. LP ( 1) N 8 | 851. RY (13) C 29 | 0.34  | 3.21   | 0.029 |
| 93. LP ( 1) N 8 | 853. RY (15) C 29 | 0.09  | 3.36   | 0.015 |
| 93. LP ( 1) N 8 | 855. RY (17) C 29 | 0.11  | 3.70   | 0.018 |
| 93. LP ( 1) N 8 | 858. RY (20) C 29 | 0.07  | 3.71   | 0.015 |
| 93. LP ( 1) N 8 | 867. RY ( 3) H 30 | 0.09  | 2.68   | 0.014 |
| 93. LP ( 1) N 8 | 870. RY ( 1) H 31 | 0.10  | 1.79   | 0.012 |
| 93. LP ( 1) N 8 | 874. RY ( 5) H 31 | 0.09  | 3.18   | 0.015 |
| 93. LP ( 1) N 8 | 875. RY ( 1) C 32 | 1.58  | 1.74   | 0.047 |
| 93. LP ( 1) N 8 | 878. RY ( 4) C 32 | 1.58  | 2.17   | 0.052 |
| 93. LP ( 1) N 8 | 879. RY ( 5) C 32 | 0.09  | 2.06   | 0.012 |
| 93. LP ( 1) N 8 | 880. RY ( 6) C 32 | 0.39  | 1.88   | 0.024 |
| 93. LP ( 1) N 8 | 881. RY ( 7) C 32 | 0.41  | 2.03   | 0.026 |
| 93. LP ( 1) N 8 | 882. RY ( 8) C 32 | 0.07  | 2.74   | 0.013 |
| 93. LP ( 1) N 8 | 883. RY ( 9) C 32 | 0.23  | 3.04   | 0.024 |
| 93. LP ( 1) N 8 | 885. RY (11) C 32 | 0.77  | 2.66   | 0.040 |
| 93. LP ( 1) N 8 | 886. RY (12) C 32 | 0.16  | 3.35   | 0.020 |
| 93. LP ( 1) N 8 | 887. RY (13) C 32 | 0.13  | 3.46   | 0.019 |
| 93. LP ( 1) N 8 | 889. RY (15) C 32 | 0.40  | 4.27   | 0.037 |
| 93. LP ( 1) N 8 | 901. RY ( 1) H 33 | 0.17  | 1.94   | 0.016 |
| 93. LP ( 1) N 8 | 902. RY ( 2) H 33 | 0.24  | 2.53   | 0.022 |
| 93. LP ( 1) N 8 | 905. RY ( 5) H 33 | 0.11  | 2.85   | 0.016 |
| 93. LP ( 1) N 8 | 911. RY ( 1) C 35 | 1.73  | 1.69   | 0.048 |
| 93. LP ( 1) N 8 | 912. RY ( 2) C 35 | 0.56  | 2.20   | 0.031 |
| 93. LP ( 1) N 8 | 913. RY ( 3) C 35 | 0.07  | 1.71   | 0.010 |

|      |    |       |   |         |       |     |       |    |        |      |        |       |
|------|----|-------|---|---------|-------|-----|-------|----|--------|------|--------|-------|
| 93.  | LP | ( 1 ) | N | 8       | 914.  | RY  | ( 4 ) | C  | 35     | 2.52 | 2.18   | 0.066 |
| 93.  | LP | ( 1 ) | N | 8       | 915.  | RY  | ( 5 ) | C  | 35     | 0.45 | 2.19   | 0.028 |
| 93.  | LP | ( 1 ) | N | 8       | 917.  | RY  | ( 7 ) | C  | 35     | 0.29 | 2.09   | 0.022 |
| 93.  | LP | ( 1 ) | N | 8       | 918.  | RY  | ( 8 ) | C  | 35     | 0.44 | 2.38   | 0.029 |
| 93.  | LP | ( 1 ) | N | 8       | 920.  | RY  | (10)  | C  | 35     | 0.22 | 2.47   | 0.021 |
| 93.  | LP | ( 1 ) | N | 8       | 921.  | RY  | (11)  | C  | 35     | 0.59 | 2.70   | 0.036 |
| 93.  | LP | ( 1 ) | N | 8       | 923.  | RY  | (13)  | C  | 35     | 0.70 | 4.08   | 0.048 |
| 93.  | LP | ( 1 ) | N | 8       | 924.  | RY  | (14)  | C  | 35     | 0.13 | 4.53   | 0.022 |
| 93.  | LP | ( 1 ) | N | 8       | 927.  | RY  | (17)  | C  | 35     | 0.07 | 3.39   | 0.014 |
| 93.  | LP | ( 1 ) | N | 8       | 928.  | RY  | (18)  | C  | 35     | 0.11 | 3.85   | 0.019 |
| 93.  | LP | ( 1 ) | N | 8       | 933.  | RY  | (23)  | C  | 35     | 0.06 | 3.90   | 0.014 |
| 93.  | LP | ( 1 ) | N | 8       | 937.  | RY  | ( 1 ) | H  | 36     | 0.11 | 1.61   | 0.012 |
| 93.  | LP | ( 1 ) | N | 8       | 942.  | RY  | ( 1 ) | H  | 37     | 0.21 | 1.71   | 0.017 |
| 93.  | LP | ( 1 ) | N | 8       | 945.  | RY  | ( 4 ) | H  | 37     | 0.08 | 3.10   | 0.014 |
| 93.  | LP | ( 1 ) | N | 8       | 948.  | RY  | ( 2 ) | C  | 38     | 0.43 | 1.96   | 0.026 |
| 93.  | LP | ( 1 ) | N | 8       | 950.  | RY  | ( 4 ) | C  | 38     | 0.06 | 1.69   | 0.009 |
| 93.  | LP | ( 1 ) | N | 8       | 952.  | RY  | ( 6 ) | C  | 38     | 0.87 | 2.01   | 0.037 |
| 93.  | LP | ( 1 ) | N | 8       | 953.  | RY  | ( 7 ) | C  | 38     | 0.06 | 2.25   | 0.010 |
| 93.  | LP | ( 1 ) | N | 8       | 957.  | RY  | (11)  | C  | 38     | 0.07 | 2.94   | 0.013 |
| 93.  | LP | ( 1 ) | N | 8       | 959.  | RY  | (13)  | C  | 38     | 0.52 | 2.84   | 0.034 |
| 93.  | LP | ( 1 ) | N | 8       | 962.  | RY  | (16)  | C  | 38     | 0.12 | 3.09   | 0.017 |
| 93.  | LP | ( 1 ) | N | 8       | 973.  | RY  | ( 1 ) | H  | 39     | 0.71 | 1.71   | 0.031 |
| 93.  | LP | ( 1 ) | N | 8       | 975.  | RY  | ( 3 ) | H  | 39     | 0.26 | 2.93   | 0.025 |
| 93.  | LP | ( 1 ) | N | 8       | 978.  | RY  | ( 1 ) | H  | 40     | 0.07 | 1.78   | 0.010 |
| 93.  | LP | ( 1 ) | N | 8       | 988.  | RY  | ( 6 ) | C  | 41     | 0.53 | 2.38   | 0.032 |
| 93.  | LP | ( 1 ) | N | 8       | 989.  | RY  | ( 7 ) | C  | 41     | 0.19 | 1.94   | 0.017 |
| 93.  | LP | ( 1 ) | N | 8       | 991.  | RY  | ( 9 ) | C  | 41     | 0.29 | 2.82   | 0.026 |
| 93.  | LP | ( 1 ) | N | 8       | 992.  | RY  | (10)  | C  | 41     | 0.08 | 3.90   | 0.015 |
| 93.  | LP | ( 1 ) | N | 8       | 993.  | RY  | (11)  | C  | 41     | 0.27 | 3.10   | 0.026 |
| 93.  | LP | ( 1 ) | N | 8       | 996.  | RY  | (14)  | C  | 41     | 0.14 | 3.24   | 0.019 |
| 93.  | LP | ( 1 ) | N | 8       | 998.  | RY  | (16)  | C  | 41     | 0.09 | 3.63   | 0.016 |
| 93.  | LP | ( 1 ) | N | 8       | 1009. | RY  | ( 1 ) | H  | 42     | 0.13 | 1.47   | 0.012 |
| 93.  | LP | ( 1 ) | N | 8       | 1019. | RY  | ( 1 ) | C  | 44     | 1.00 | 1.68   | 0.037 |
| 93.  | LP | ( 1 ) | N | 8       | 1020. | RY  | ( 2 ) | C  | 44     | 0.28 | 2.07   | 0.021 |
| 93.  | LP | ( 1 ) | N | 8       | 1021. | RY  | ( 3 ) | C  | 44     | 0.10 | 1.84   | 0.012 |
| 93.  | LP | ( 1 ) | N | 8       | 1022. | RY  | ( 4 ) | C  | 44     | 2.12 | 2.09   | 0.059 |
| 93.  | LP | ( 1 ) | N | 8       | 1024. | RY  | ( 6 ) | C  | 44     | 0.45 | 2.14   | 0.028 |
| 93.  | LP | ( 1 ) | N | 8       | 1025. | RY  | ( 7 ) | C  | 44     | 0.18 | 2.62   | 0.019 |
| 93.  | LP | ( 1 ) | N | 8       | 1027. | RY  | ( 9 ) | C  | 44     | 0.45 | 2.67   | 0.031 |
| 93.  | LP | ( 1 ) | N | 8       | 1028. | RY  | (10)  | C  | 44     | 0.16 | 3.16   | 0.020 |
| 93.  | LP | ( 1 ) | N | 8       | 1029. | RY  | (11)  | C  | 44     | 1.29 | 2.88   | 0.054 |
| 93.  | LP | ( 1 ) | N | 8       | 1030. | RY  | (12)  | C  | 44     | 0.09 | 3.20   | 0.015 |
| 93.  | LP | ( 1 ) | N | 8       | 1031. | RY  | (13)  | C  | 44     | 0.42 | 4.68   | 0.039 |
| 93.  | LP | ( 1 ) | N | 8       | 1032. | RY  | (14)  | C  | 44     | 0.09 | 3.21   | 0.015 |
| 93.  | LP | ( 1 ) | N | 8       | 1034. | RY  | (16)  | C  | 44     | 0.13 | 4.30   | 0.021 |
| 93.  | LP | ( 1 ) | N | 8       | 1035. | RY  | (17)  | C  | 44     | 0.07 | 3.13   | 0.013 |
| 93.  | LP | ( 1 ) | N | 8       | 1036. | RY  | (18)  | C  | 44     | 0.11 | 4.05   | 0.019 |
| 93.  | LP | ( 1 ) | N | 8       | 1045. | RY  | ( 1 ) | H  | 45     | 0.59 | 1.74   | 0.029 |
| 93.  | LP | ( 1 ) | N | 8       | 1046. | RY  | ( 2 ) | H  | 45     | 0.13 | 2.81   | 0.017 |
| 93.  | LP | ( 1 ) | N | 8       | 1048. | RY  | ( 4 ) | H  | 45     | 0.10 | 3.00   | 0.016 |
| 93.  | LP | ( 1 ) | N | 8       | 1049. | RY  | ( 5 ) | H  | 45     | 0.06 | 3.11   | 0.013 |
| 93.  | LP | ( 1 ) | N | 8       | 1050. | RY  | ( 1 ) | H  | 46     | 0.29 | 1.64   | 0.020 |
| 93.  | LP | ( 1 ) | N | 8       | 1053. | RY  | ( 4 ) | H  | 46     | 0.08 | 2.77   | 0.013 |
| 128. | BD | ( 1 ) | N | 7- C 10 | 184.  | BD* | ( 1 ) | Pt | 1- S 2 | 0.08 | 1.00   | 0.008 |
| 128. | BD | ( 1 ) | N | 7- C 10 | 185.  | BD* | ( 1 ) | Pt | 1- S 3 | 1.81 | 1.01   | 0.038 |
| 128. | BD | ( 1 ) | N | 7- C 10 | 250.  | RY  | ( 3 ) | Pt | 1      | 0.24 | 3.42   | 0.025 |
| 128. | BD | ( 1 ) | N | 7- C 10 | 251.  | RY  | ( 4 ) | Pt | 1      | 0.35 | 2.86   | 0.028 |
| 128. | BD | ( 1 ) | N | 7- C 10 | 253.  | RY  | ( 6 ) | Pt | 1      | 0.30 | 3.78   | 0.030 |
| 128. | BD | ( 1 ) | N | 7- C 10 | 254.  | RY  | ( 7 ) | Pt | 1      | 0.05 | 2.64   | 0.011 |
| 128. | BD | ( 1 ) | N | 7- C 10 | 259.  | RY  | (12)  | Pt | 1      | 0.09 | 3.42   | 0.016 |
| 128. | BD | ( 1 ) | N | 7- C 10 | 267.  | RY  | (20)  | Pt | 1      | 0.21 | 4.82   | 0.028 |
| 128. | BD | ( 1 ) | N | 7- C 10 | 268.  | RY  | (21)  | Pt | 1      | 0.07 | 3.39   | 0.014 |
| 128. | BD | ( 1 ) | N | 7- C 10 | 272.  | RY  | (25)  | Pt | 1      | 0.06 | 2.95   | 0.011 |
| 128. | BD | ( 1 ) | N | 7- C 10 | 274.  | RY  | (27)  | Pt | 1      | 0.16 | 27.92  | 0.059 |
| 128. | BD | ( 1 ) | N | 7- C 10 | 275.  | RY  | (28)  | Pt | 1      | 0.11 | 28.49  | 0.050 |
| 129. | BD | ( 2 ) | N | 7- C 10 | 184.  | BD* | ( 1 ) | Pt | 1- S 2 | 0.06 | 0.50   | 0.005 |
| 129. | BD | ( 2 ) | N | 7- C 10 | 185.  | BD* | ( 1 ) | Pt | 1- S 3 | 0.18 | 0.51   | 0.008 |
| 129. | BD | ( 2 ) | N | 7- C 10 | 248.  | RY  | ( 1 ) | Pt | 1      | 0.08 | 2.28   | 0.012 |
| 129. | BD | ( 2 ) | N | 7- C 10 | 252.  | RY  | ( 5 ) | Pt | 1      | 0.63 | 2.82   | 0.038 |
| 129. | BD | ( 2 ) | N | 7- C 10 | 254.  | RY  | ( 7 ) | Pt | 1      | 0.19 | 2.13   | 0.018 |
| 129. | BD | ( 2 ) | N | 7- C 10 | 255.  | RY  | ( 8 ) | Pt | 1      | 0.06 | 2.74   | 0.012 |
| 129. | BD | ( 2 ) | N | 7- C 10 | 267.  | RY  | (20)  | Pt | 1      | 0.06 | 4.32   | 0.014 |
| 129. | BD | ( 2 ) | N | 7- C 10 | 269.  | RY  | (22)  | Pt | 1      | 0.10 | 2.40   | 0.014 |
| 129. | BD | ( 2 ) | N | 7- C 10 | 270.  | RY  | (23)  | Pt | 1      | 0.06 | 2.29   | 0.011 |
| 129. | BD | ( 2 ) | N | 7- C 10 | 273.  | RY  | (26)  | Pt | 1      | 0.05 | 37.15  | 0.039 |
| 130. | BD | ( 1 ) | N | 7- C 17 | 184.  | BD* | ( 1 ) | Pt | 1- S 2 | 0.49 | 1.00   | 0.020 |
| 130. | BD | ( 1 ) | N | 7- C 17 | 185.  | BD* | ( 1 ) | Pt | 1- S 3 | 3.77 | 1.00   | 0.055 |
| 130. | BD | ( 1 ) | N | 7- C 17 | 248.  | RY  | ( 1 ) | Pt | 1      | 0.19 | 2.78   | 0.020 |
| 130. | BD | ( 1 ) | N | 7- C 17 | 249.  | RY  | ( 2 ) | Pt | 1      | 0.95 | 3.36   | 0.050 |
| 130. | BD | ( 1 ) | N | 7- C 17 | 250.  | RY  | ( 3 ) | Pt | 1      | 0.09 | 3.41   | 0.016 |
| 130. | BD | ( 1 ) | N | 7- C 17 | 251.  | RY  | ( 4 ) | Pt | 1      | 0.16 | 2.85   | 0.019 |
| 130. | BD | ( 1 ) | N | 7- C 17 | 252.  | RY  | ( 5 ) | Pt | 1      | 0.21 | 3.32   | 0.023 |
| 130. | BD | ( 1 ) | N | 7- C 17 | 254.  | RY  | ( 7 ) | Pt | 1      | 0.12 | 2.63   | 0.016 |
| 130. | BD | ( 1 ) | N | 7- C 17 | 255.  | RY  | ( 8 ) | Pt | 1      | 0.38 | 3.24   | 0.031 |
| 130. | BD | ( 1 ) | N | 7- C 17 | 256.  | RY  | ( 9 ) | Pt | 1      | 0.07 | 3.32   | 0.014 |
| 130. | BD | ( 1 ) | N | 7- C 17 | 257.  | RY  | (10)  | Pt | 1      | 0.08 | 5.10   | 0.018 |
| 130. | BD | ( 1 ) | N | 7- C 17 | 260.  | RY  | (13)  | Pt | 1      | 0.18 | 8.00   | 0.034 |
| 130. | BD | ( 1 ) | N | 7- C 17 | 262.  | RY  | (15)  | Pt | 1      | 0.26 | 3.80   | 0.028 |
| 130. | BD | ( 1 ) | N | 7- C 17 | 263.  | RY  | (16)  | Pt | 1      | 0.11 | 3.60   | 0.018 |
| 130. | BD | ( 1 ) | N | 7- C 17 | 265.  | RY  | (18)  | Pt | 1      | 0.16 | 4.33   | 0.023 |
| 130. | BD | ( 1 ) | N | 7- C 17 | 267.  | RY  | (20)  | Pt | 1      | 0.35 | 4.81   | 0.037 |
| 130. | BD | ( 1 ) | N | 7- C 17 | 269.  | RY  | (22)  | Pt | 1      | 0.05 | 2.90   | 0.011 |
| 130. | BD | ( 1 ) | N | 7- C 17 | 271.  | RY  | (24)  | Pt | 1      | 0.22 | 5.55   | 0.031 |
| 130. | BD | ( 1 ) | N | 7- C 17 | 273.  | RY  | (26)  | Pt | 1      | 0.47 | 37.65  | 0.118 |
| 130. | BD | ( 1 ) | N | 7- C 17 | 275.  | RY  | (28)  | Pt | 1      | 0.09 | 28.48  | 0.045 |
| 130. | BD | ( 1 ) | N | 7- C 17 | 276.  | RY  | (29)  | Pt | 1      | 0.08 | 237.35 | 0.120 |
| 130. | BD | ( 1 ) | N | 7- C 17 | 281.  | RY  | ( 4 ) | S  | 2      | 0.20 | 2.28   | 0.019 |
| 130. | BD | ( 1 ) | N | 7- C 17 | 282.  | RY  | ( 5 ) | S  | 2      | 0.27 | 5.74   | 0.035 |
| 130. | BD | ( 1 ) | N | 7- C 17 | 283.  | RY  | ( 6 ) | S  | 2      | 0.21 | 2.44   | 0.020 |
| 130. | BD | ( 1 ) | N | 7- C 17 | 284.  | RY  | ( 7 ) | S  | 2      | 0.08 | 2.52   | 0.012 |
| 130. | BD | ( 1 ) | N | 7- C 17 | 286.  | RY  | ( 9 ) | S  | 2      | 0.10 | 2.91   | 0.015 |
| 130. | BD | ( 1 ) | N | 7- C 17 | 297.  | RY  | (20)  | S  | 2      | 0.07 | 4.26   | 0.015 |
| 130. | BD | ( 1 ) | N | 7- C 17 | 299.  | RY  | (22)  | S  | 2      | 0.11 | 5.12   | 0.021 |

|      |    |     |   |     |   |    |       |     |      |    |         |      |        |       |
|------|----|-----|---|-----|---|----|-------|-----|------|----|---------|------|--------|-------|
| 130. | BD | (1) | N | 7-  | C | 17 | 309.  | RY  | (4)  | S  | 3       | 0.17 | 2.16   | 0.017 |
| 130. | BD | (1) | N | 7-  | C | 17 | 310.  | RY  | (5)  | S  | 3       | 0.38 | 4.36   | 0.036 |
| 130. | BD | (1) | N | 7-  | C | 17 | 311.  | RY  | (6)  | S  | 3       | 0.43 | 4.48   | 0.039 |
| 130. | BD | (1) | N | 7-  | C | 17 | 312.  | RY  | (7)  | S  | 3       | 0.07 | 2.69   | 0.012 |
| 130. | BD | (1) | N | 7-  | C | 17 | 313.  | RY  | (8)  | S  | 3       | 0.05 | 2.45   | 0.010 |
| 130. | BD | (1) | N | 7-  | C | 17 | 327.  | RY  | (22) | S  | 3       | 0.08 | 3.69   | 0.016 |
| 130. | BD | (1) | N | 7-  | C | 17 | 840.  | RY  | (2)  | C  | 29      | 0.06 | 1.95   | 0.010 |
| 130. | BD | (1) | N | 7-  | C | 17 | 875.  | RY  | (1)  | C  | 32      | 0.09 | 2.14   | 0.012 |
| 130. | BD | (1) | N | 7-  | C | 17 | 911.  | RY  | (1)  | C  | 35      | 0.07 | 2.08   | 0.010 |
| 130. | BD | (1) | N | 7-  | C | 17 | 914.  | RY  | (4)  | C  | 35      | 0.06 | 2.57   | 0.011 |
| 130. | BD | (1) | N | 7-  | C | 17 | 952.  | RY  | (6)  | C  | 38      | 0.06 | 2.41   | 0.010 |
| 130. | BD | (1) | N | 7-  | C | 17 | 1022. | RY  | (4)  | C  | 44      | 0.08 | 2.48   | 0.013 |
| 130. | BD | (1) | N | 7-  | C | 17 | 1045. | RY  | (1)  | H  | 45      | 0.06 | 2.14   | 0.010 |
| 131. | BD | (1) | N | 8-  | C | 22 | 184.  | BD* | (1)  | Pt | 1- S 2  | 3.31 | 0.95   | 0.050 |
| 131. | BD | (1) | N | 8-  | C | 22 | 185.  | BD* | (1)  | Pt | 1- S 3  | 0.41 | 0.95   | 0.018 |
| 131. | BD | (1) | N | 8-  | C | 22 | 248.  | RY  | (1)  | Pt | 1       | 0.17 | 2.73   | 0.019 |
| 131. | BD | (1) | N | 8-  | C | 22 | 249.  | RY  | (2)  | Pt | 1       | 0.80 | 3.31   | 0.046 |
| 131. | BD | (1) | N | 8-  | C | 22 | 251.  | RY  | (4)  | Pt | 1       | 0.09 | 2.80   | 0.014 |
| 131. | BD | (1) | N | 8-  | C | 22 | 252.  | RY  | (5)  | Pt | 1       | 0.18 | 3.27   | 0.022 |
| 131. | BD | (1) | N | 8-  | C | 22 | 253.  | RY  | (6)  | Pt | 1       | 0.07 | 3.72   | 0.015 |
| 131. | BD | (1) | N | 8-  | C | 22 | 254.  | RY  | (7)  | Pt | 1       | 0.09 | 2.58   | 0.014 |
| 131. | BD | (1) | N | 8-  | C | 22 | 255.  | RY  | (8)  | Pt | 1       | 0.26 | 3.19   | 0.026 |
| 131. | BD | (1) | N | 8-  | C | 22 | 257.  | RY  | (10) | Pt | 1       | 0.10 | 5.05   | 0.020 |
| 131. | BD | (1) | N | 8-  | C | 22 | 259.  | RY  | (12) | Pt | 1       | 0.08 | 3.36   | 0.015 |
| 131. | BD | (1) | N | 8-  | C | 22 | 260.  | RY  | (13) | Pt | 1       | 0.17 | 7.95   | 0.033 |
| 131. | BD | (1) | N | 8-  | C | 22 | 262.  | RY  | (15) | Pt | 1       | 0.20 | 3.75   | 0.025 |
| 131. | BD | (1) | N | 8-  | C | 22 | 263.  | RY  | (16) | Pt | 1       | 0.09 | 3.55   | 0.016 |
| 131. | BD | (1) | N | 8-  | C | 22 | 265.  | RY  | (18) | Pt | 1       | 0.23 | 4.28   | 0.028 |
| 131. | BD | (1) | N | 8-  | C | 22 | 266.  | RY  | (19) | Pt | 1       | 0.16 | 4.25   | 0.023 |
| 131. | BD | (1) | N | 8-  | C | 22 | 267.  | RY  | (20) | Pt | 1       | 0.08 | 4.76   | 0.017 |
| 131. | BD | (1) | N | 8-  | C | 22 | 269.  | RY  | (22) | Pt | 1       | 0.06 | 2.85   | 0.011 |
| 131. | BD | (1) | N | 8-  | C | 22 | 271.  | RY  | (24) | Pt | 1       | 0.21 | 5.50   | 0.030 |
| 131. | BD | (1) | N | 8-  | C | 22 | 273.  | RY  | (26) | Pt | 1       | 0.33 | 37.60  | 0.099 |
| 131. | BD | (1) | N | 8-  | C | 22 | 276.  | RY  | (29) | Pt | 1       | 0.06 | 237.30 | 0.102 |
| 131. | BD | (1) | N | 8-  | C | 22 | 281.  | RY  | (4)  | S  | 2       | 0.16 | 2.23   | 0.017 |
| 131. | BD | (1) | N | 8-  | C | 22 | 282.  | RY  | (5)  | S  | 2       | 0.31 | 5.69   | 0.038 |
| 131. | BD | (1) | N | 8-  | C | 22 | 283.  | RY  | (6)  | S  | 2       | 0.15 | 2.39   | 0.017 |
| 131. | BD | (1) | N | 8-  | C | 22 | 285.  | RY  | (8)  | S  | 2       | 0.10 | 2.57   | 0.014 |
| 131. | BD | (1) | N | 8-  | C | 22 | 299.  | RY  | (22) | S  | 2       | 0.06 | 5.07   | 0.016 |
| 131. | BD | (1) | N | 8-  | C | 22 | 309.  | RY  | (4)  | S  | 3       | 0.10 | 2.11   | 0.013 |
| 131. | BD | (1) | N | 8-  | C | 22 | 310.  | RY  | (5)  | S  | 3       | 0.18 | 4.31   | 0.025 |
| 131. | BD | (1) | N | 8-  | C | 22 | 311.  | RY  | (6)  | S  | 3       | 0.30 | 4.43   | 0.033 |
| 131. | BD | (1) | N | 8-  | C | 22 | 322.  | RY  | (17) | S  | 3       | 0.05 | 4.21   | 0.014 |
| 131. | BD | (1) | N | 8-  | C | 22 | 325.  | RY  | (20) | S  | 3       | 0.05 | 4.25   | 0.013 |
| 131. | BD | (1) | N | 8-  | C | 22 | 327.  | RY  | (22) | S  | 3       | 0.07 | 3.64   | 0.014 |
| 131. | BD | (1) | N | 8-  | C | 22 | 840.  | RY  | (2)  | C  | 29      | 0.07 | 1.90   | 0.010 |
| 131. | BD | (1) | N | 8-  | C | 22 | 875.  | RY  | (1)  | C  | 32      | 0.05 | 2.09   | 0.010 |
| 131. | BD | (1) | N | 8-  | C | 22 | 911.  | RY  | (1)  | C  | 35      | 0.05 | 2.03   | 0.009 |
| 131. | BD | (1) | N | 8-  | C | 22 | 914.  | RY  | (4)  | C  | 35      | 0.07 | 2.52   | 0.012 |
| 131. | BD | (1) | N | 8-  | C | 22 | 1022. | RY  | (4)  | C  | 44      | 0.06 | 2.43   | 0.011 |
| 132. | BD | (1) | N | 8-  | C | 27 | 184.  | BD* | (1)  | Pt | 1- S 2  | 2.41 | 1.04   | 0.045 |
| 132. | BD | (1) | N | 8-  | C | 27 | 185.  | BD* | (1)  | Pt | 1- S 3  | 0.13 | 1.04   | 0.010 |
| 132. | BD | (1) | N | 8-  | C | 27 | 250.  | RY  | (3)  | Pt | 1       | 0.45 | 3.45   | 0.035 |
| 132. | BD | (1) | N | 8-  | C | 27 | 251.  | RY  | (4)  | Pt | 1       | 0.29 | 2.89   | 0.026 |
| 132. | BD | (1) | N | 8-  | C | 27 | 255.  | RY  | (8)  | Pt | 1       | 0.10 | 3.28   | 0.016 |
| 132. | BD | (1) | N | 8-  | C | 27 | 256.  | RY  | (9)  | Pt | 1       | 0.06 | 3.36   | 0.012 |
| 132. | BD | (1) | N | 8-  | C | 27 | 257.  | RY  | (10) | Pt | 1       | 0.08 | 5.14   | 0.018 |
| 132. | BD | (1) | N | 8-  | C | 27 | 259.  | RY  | (12) | Pt | 1       | 0.08 | 3.45   | 0.015 |
| 132. | BD | (1) | N | 8-  | C | 27 | 265.  | RY  | (18) | Pt | 1       | 0.18 | 4.37   | 0.025 |
| 132. | BD | (1) | N | 8-  | C | 27 | 266.  | RY  | (19) | Pt | 1       | 0.21 | 4.34   | 0.027 |
| 132. | BD | (1) | N | 8-  | C | 27 | 268.  | RY  | (21) | Pt | 1       | 0.18 | 3.43   | 0.022 |
| 132. | BD | (1) | N | 8-  | C | 27 | 271.  | RY  | (24) | Pt | 1       | 0.07 | 5.59   | 0.018 |
| 132. | BD | (1) | N | 8-  | C | 27 | 274.  | RY  | (27) | Pt | 1       | 0.13 | 27.95  | 0.054 |
| 132. | BD | (1) | N | 8-  | C | 27 | 275.  | RY  | (28) | Pt | 1       | 0.13 | 28.52  | 0.055 |
| 133. | BD | (2) | N | 8-  | C | 27 | 184.  | BD* | (1)  | Pt | 1- S 2  | 0.11 | 0.51   | 0.007 |
| 133. | BD | (2) | N | 8-  | C | 27 | 185.  | BD* | (1)  | Pt | 1- S 3  | 0.12 | 0.51   | 0.007 |
| 133. | BD | (2) | N | 8-  | C | 27 | 248.  | RY  | (1)  | Pt | 1       | 0.15 | 2.29   | 0.016 |
| 133. | BD | (2) | N | 8-  | C | 27 | 252.  | RY  | (5)  | Pt | 1       | 0.82 | 2.83   | 0.043 |
| 133. | BD | (2) | N | 8-  | C | 27 | 256.  | RY  | (9)  | Pt | 1       | 0.09 | 2.83   | 0.014 |
| 133. | BD | (2) | N | 8-  | C | 27 | 260.  | RY  | (13) | Pt | 1       | 0.06 | 7.51   | 0.018 |
| 133. | BD | (2) | N | 8-  | C | 27 | 261.  | RY  | (14) | Pt | 1       | 0.19 | 2.47   | 0.019 |
| 133. | BD | (2) | N | 8-  | C | 27 | 266.  | RY  | (19) | Pt | 1       | 0.09 | 3.81   | 0.016 |
| 133. | BD | (2) | N | 8-  | C | 27 | 269.  | RY  | (22) | Pt | 1       | 0.08 | 2.41   | 0.013 |
| 133. | BD | (2) | N | 8-  | C | 27 | 270.  | RY  | (23) | Pt | 1       | 0.12 | 2.30   | 0.015 |
| 133. | BD | (2) | N | 8-  | C | 27 | 273.  | RY  | (26) | Pt | 1       | 0.10 | 37.16  | 0.053 |
| 133. | BD | (2) | N | 8-  | C | 27 | 282.  | RY  | (5)  | S  | 2       | 0.09 | 5.25   | 0.019 |
| 133. | BD | (2) | N | 8-  | C | 27 | 310.  | RY  | (5)  | S  | 3       | 0.09 | 3.87   | 0.017 |
| 133. | BD | (2) | N | 8-  | C | 27 | 311.  | RY  | (6)  | S  | 3       | 0.07 | 3.99   | 0.015 |
| 135. | BD | (1) | C | 10- | H | 11 | 184.  | BD* | (1)  | Pt | 1- S 2  | 0.69 | 0.72   | 0.020 |
| 135. | BD | (1) | C | 10- | H | 11 | 185.  | BD* | (1)  | Pt | 1- S 3  | 0.82 | 0.72   | 0.022 |
| 135. | BD | (1) | C | 10- | H | 11 | 186.  | BD* | (1)  | S  | 2- C 29 | 0.08 | 0.65   | 0.007 |
| 135. | BD | (1) | C | 10- | H | 11 | 248.  | RY  | (1)  | Pt | 1       | 0.42 | 2.50   | 0.029 |
| 135. | BD | (1) | C | 10- | H | 11 | 249.  | RY  | (2)  | Pt | 1       | 0.30 | 3.09   | 0.027 |
| 135. | BD | (1) | C | 10- | H | 11 | 252.  | RY  | (5)  | Pt | 1       | 0.50 | 3.04   | 0.035 |
| 135. | BD | (1) | C | 10- | H | 11 | 253.  | RY  | (6)  | Pt | 1       | 0.14 | 3.49   | 0.019 |
| 135. | BD | (1) | C | 10- | H | 11 | 255.  | RY  | (8)  | Pt | 1       | 0.41 | 2.96   | 0.031 |
| 135. | BD | (1) | C | 10- | H | 11 | 256.  | RY  | (9)  | Pt | 1       | 0.28 | 3.04   | 0.026 |
| 135. | BD | (1) | C | 10- | H | 11 | 257.  | RY  | (10) | Pt | 1       | 0.73 | 4.83   | 0.053 |
| 135. | BD | (1) | C | 10- | H | 11 | 258.  | RY  | (11) | Pt | 1       | 0.12 | 3.15   | 0.018 |
| 135. | BD | (1) | C | 10- | H | 11 | 259.  | RY  | (12) | Pt | 1       | 0.18 | 3.13   | 0.021 |
| 135. | BD | (1) | C | 10- | H | 11 | 260.  | RY  | (13) | Pt | 1       | 0.57 | 7.72   | 0.059 |
| 135. | BD | (1) | C | 10- | H | 11 | 261.  | RY  | (14) | Pt | 1       | 0.10 | 2.68   | 0.015 |
| 135. | BD | (1) | C | 10- | H | 11 | 262.  | RY  | (15) | Pt | 1       | 0.54 | 3.52   | 0.039 |
| 135. | BD | (1) | C | 10- | H | 11 | 263.  | RY  | (16) | Pt | 1       | 0.32 | 3.32   | 0.029 |
| 135. | BD | (1) | C | 10- | H | 11 | 264.  | RY  | (17) | Pt | 1       | 0.10 | 2.82   | 0.015 |
| 135. | BD | (1) | C | 10- | H | 11 | 265.  | RY  | (18) | Pt | 1       | 0.18 | 4.05   | 0.024 |
| 135. | BD | (1) | C | 10- | H | 11 | 266.  | RY  | (19) | Pt | 1       | 0.09 | 4.02   | 0.017 |
| 135. | BD | (1) | C | 10- | H | 11 | 267.  | RY  | (20) | Pt | 1       | 0.61 | 4.53   | 0.047 |
| 135. | BD | (1) | C | 10- | H | 11 | 270.  | RY  | (23) | Pt | 1       | 0.10 | 2.51   | 0.014 |
| 135. | BD | (1) | C | 10- | H | 11 | 271.  | RY  | (24) | Pt | 1       | 0.35 | 5.27   | 0.038 |
| 135. | BD | (1) | C | 10- | H | 11 | 273.  | RY  | (26) | Pt | 1       | 1.15 | 37.37  | 0.185 |
| 135. | BD | (1) | C | 10- | H | 11 | 275.  | RY  | (28) | Pt | 1       | 0.06 | 28.20  | 0.035 |
| 135. | BD | (1) | C | 10- | H | 11 | 276.  | RY  | (29) | Pt | 1       | 0.36 | 237.07 | 0.261 |



|                        |                        |      |        |       |
|------------------------|------------------------|------|--------|-------|
| 135. BD (1) C 10- H 11 | 279. RY (2) S 2        | 0.23 | 1.75   | 0.018 |
| 135. BD (1) C 10- H 11 | 281. RY (4) S 2        | 0.39 | 2.01   | 0.025 |
| 135. BD (1) C 10- H 11 | 282. RY (5) S 2        | 0.74 | 5.46   | 0.057 |
| 135. BD (1) C 10- H 11 | 283. RY (6) S 2        | 0.66 | 2.16   | 0.034 |
| 135. BD (1) C 10- H 11 | 284. RY (7) S 2        | 0.12 | 2.24   | 0.015 |
| 135. BD (1) C 10- H 11 | 285. RY (8) S 2        | 0.13 | 2.34   | 0.016 |
| 135. BD (1) C 10- H 11 | 286. RY (9) S 2        | 0.19 | 2.63   | 0.020 |
| 135. BD (1) C 10- H 11 | 289. RY (12) S 2       | 0.14 | 3.49   | 0.020 |
| 135. BD (1) C 10- H 11 | 293. RY (16) S 2       | 0.08 | 3.43   | 0.014 |
| 135. BD (1) C 10- H 11 | 294. RY (17) S 2       | 0.11 | 3.54   | 0.018 |
| 135. BD (1) C 10- H 11 | 297. RY (20) S 2       | 0.20 | 3.99   | 0.025 |
| 135. BD (1) C 10- H 11 | 299. RY (22) S 2       | 0.27 | 4.84   | 0.033 |
| 135. BD (1) C 10- H 11 | 307. RY (2) S 3        | 0.10 | 1.48   | 0.011 |
| 135. BD (1) C 10- H 11 | 308. RY (3) S 3        | 0.07 | 1.49   | 0.009 |
| 135. BD (1) C 10- H 11 | 309. RY (4) S 3        | 0.35 | 1.89   | 0.023 |
| 135. BD (1) C 10- H 11 | 310. RY (5) S 3        | 0.80 | 4.09   | 0.051 |
| 135. BD (1) C 10- H 11 | 311. RY (6) S 3        | 0.93 | 4.21   | 0.056 |
| 135. BD (1) C 10- H 11 | 312. RY (7) S 3        | 0.17 | 2.41   | 0.018 |
| 135. BD (1) C 10- H 11 | 314. RY (9) S 3        | 0.07 | 2.43   | 0.011 |
| 135. BD (1) C 10- H 11 | 315. RY (10) S 3       | 0.07 | 2.49   | 0.012 |
| 135. BD (1) C 10- H 11 | 317. RY (12) S 3       | 0.05 | 3.48   | 0.012 |
| 135. BD (1) C 10- H 11 | 322. RY (17) S 3       | 0.11 | 3.99   | 0.019 |
| 135. BD (1) C 10- H 11 | 323. RY (18) S 3       | 0.07 | 3.54   | 0.014 |
| 135. BD (1) C 10- H 11 | 325. RY (20) S 3       | 0.14 | 4.03   | 0.021 |
| 135. BD (1) C 10- H 11 | 327. RY (22) S 3       | 0.17 | 3.41   | 0.022 |
| 135. BD (1) C 10- H 11 | 334. RY (1) S 4        | 0.12 | 1.53   | 0.012 |
| 135. BD (1) C 10- H 11 | 840. RY (2) C 29       | 0.15 | 1.67   | 0.014 |
| 135. BD (1) C 10- H 11 | 842. RY (4) C 29       | 0.09 | 2.23   | 0.013 |
| 135. BD (1) C 10- H 11 | 843. RY (5) C 29       | 0.10 | 2.40   | 0.013 |
| 135. BD (1) C 10- H 11 | 850. RY (12) C 29      | 0.05 | 3.56   | 0.012 |
| 135. BD (1) C 10- H 11 | 875. RY (1) C 32       | 0.12 | 1.86   | 0.013 |
| 135. BD (1) C 10- H 11 | 878. RY (4) C 32       | 0.11 | 2.29   | 0.014 |
| 135. BD (1) C 10- H 11 | 885. RY (11) C 32      | 0.06 | 2.77   | 0.012 |
| 135. BD (1) C 10- H 11 | 911. RY (1) C 35       | 0.14 | 1.80   | 0.014 |
| 135. BD (1) C 10- H 11 | 914. RY (4) C 35       | 0.19 | 2.29   | 0.018 |
| 135. BD (1) C 10- H 11 | 923. RY (13) C 35      | 0.05 | 4.20   | 0.013 |
| 135. BD (1) C 10- H 11 | 952. RY (6) C 38       | 0.08 | 2.13   | 0.011 |
| 135. BD (1) C 10- H 11 | 973. RY (1) H 39       | 0.06 | 1.83   | 0.009 |
| 135. BD (1) C 10- H 11 | 1019. RY (1) C 44      | 0.07 | 1.79   | 0.010 |
| 135. BD (1) C 10- H 11 | 1022. RY (4) C 44      | 0.16 | 2.20   | 0.017 |
| 135. BD (1) C 10- H 11 | 1029. RY (11) C 44     | 0.09 | 3.00   | 0.015 |
| 136. BD (1) C 10- C 12 | 185. BD* (1) Pt 1- S 3 | 0.13 | 0.81   | 0.009 |
| 136. BD (1) C 10- C 12 | 252. RY (5) Pt 1       | 0.14 | 3.12   | 0.018 |
| 136. BD (1) C 10- C 12 | 255. RY (8) Pt 1       | 0.13 | 3.04   | 0.017 |
| 136. BD (1) C 10- C 12 | 257. RY (10) Pt 1      | 0.13 | 4.91   | 0.023 |
| 136. BD (1) C 10- C 12 | 258. RY (11) Pt 1      | 0.08 | 3.24   | 0.014 |
| 136. BD (1) C 10- C 12 | 259. RY (12) Pt 1      | 0.06 | 3.22   | 0.012 |
| 136. BD (1) C 10- C 12 | 260. RY (13) Pt 1      | 0.14 | 7.80   | 0.029 |
| 136. BD (1) C 10- C 12 | 262. RY (15) Pt 1      | 0.06 | 3.60   | 0.014 |
| 136. BD (1) C 10- C 12 | 263. RY (16) Pt 1      | 0.05 | 3.40   | 0.012 |
| 136. BD (1) C 10- C 12 | 267. RY (20) Pt 1      | 0.07 | 4.62   | 0.016 |
| 136. BD (1) C 10- C 12 | 273. RY (26) Pt 1      | 0.28 | 37.46  | 0.091 |
| 136. BD (1) C 10- C 12 | 276. RY (29) Pt 1      | 0.11 | 237.16 | 0.142 |
| 136. BD (1) C 10- C 12 | 281. RY (4) S 2        | 0.08 | 2.09   | 0.012 |
| 136. BD (1) C 10- C 12 | 282. RY (5) S 2        | 0.13 | 5.55   | 0.024 |
| 136. BD (1) C 10- C 12 | 283. RY (6) S 2        | 0.09 | 2.24   | 0.013 |
| 136. BD (1) C 10- C 12 | 309. RY (4) S 3        | 0.08 | 1.97   | 0.012 |
| 136. BD (1) C 10- C 12 | 310. RY (5) S 3        | 0.19 | 4.17   | 0.025 |
| 136. BD (1) C 10- C 12 | 311. RY (6) S 3        | 0.16 | 4.29   | 0.024 |
| 141. BD (1) C 14- C 16 | 260. RY (13) Pt 1      | 0.06 | 7.83   | 0.020 |
| 141. BD (1) C 14- C 16 | 273. RY (26) Pt 1      | 0.07 | 37.48  | 0.044 |
| 142. BD (1) C 16- C 17 | 185. BD* (1) Pt 1- S 3 | 0.31 | 0.79   | 0.014 |
| 142. BD (1) C 16- C 17 | 252. RY (5) Pt 1       | 0.06 | 3.10   | 0.012 |
| 142. BD (1) C 16- C 17 | 255. RY (8) Pt 1       | 0.09 | 3.02   | 0.014 |
| 142. BD (1) C 16- C 17 | 259. RY (12) Pt 1      | 0.08 | 3.20   | 0.015 |
| 142. BD (1) C 16- C 17 | 260. RY (13) Pt 1      | 0.07 | 7.78   | 0.021 |
| 142. BD (1) C 16- C 17 | 267. RY (20) Pt 1      | 0.14 | 4.60   | 0.023 |
| 142. BD (1) C 16- C 17 | 271. RY (24) Pt 1      | 0.13 | 5.33   | 0.023 |
| 142. BD (1) C 16- C 17 | 273. RY (26) Pt 1      | 0.13 | 37.44  | 0.063 |
| 142. BD (1) C 16- C 17 | 275. RY (28) Pt 1      | 0.06 | 28.26  | 0.038 |
| 142. BD (1) C 16- C 17 | 276. RY (29) Pt 1      | 0.08 | 237.14 | 0.122 |
| 142. BD (1) C 16- C 17 | 282. RY (5) S 2        | 0.07 | 5.53   | 0.017 |
| 142. BD (1) C 16- C 17 | 310. RY (5) S 3        | 0.08 | 4.15   | 0.016 |
| 142. BD (1) C 16- C 17 | 311. RY (6) S 3        | 0.08 | 4.27   | 0.016 |
| 144. BD (1) C 17- C 22 | 184. BD* (1) Pt 1- S 2 | 2.42 | 0.83   | 0.040 |
| 144. BD (1) C 17- C 22 | 185. BD* (1) Pt 1- S 3 | 2.42 | 0.84   | 0.040 |
| 144. BD (1) C 17- C 22 | 248. RY (1) Pt 1       | 1.60 | 2.61   | 0.058 |
| 144. BD (1) C 17- C 22 | 249. RY (2) Pt 1       | 2.55 | 3.20   | 0.081 |
| 144. BD (1) C 17- C 22 | 251. RY (4) Pt 1       | 0.07 | 2.69   | 0.012 |
| 144. BD (1) C 17- C 22 | 252. RY (5) Pt 1       | 1.87 | 3.15   | 0.068 |
| 144. BD (1) C 17- C 22 | 253. RY (6) Pt 1       | 0.45 | 3.61   | 0.036 |
| 144. BD (1) C 17- C 22 | 254. RY (7) Pt 1       | 0.05 | 2.47   | 0.010 |
| 144. BD (1) C 17- C 22 | 255. RY (8) Pt 1       | 2.15 | 3.07   | 0.073 |
| 144. BD (1) C 17- C 22 | 256. RY (9) Pt 1       | 0.96 | 3.16   | 0.049 |
| 144. BD (1) C 17- C 22 | 257. RY (10) Pt 1      | 2.85 | 4.94   | 0.106 |
| 144. BD (1) C 17- C 22 | 258. RY (11) Pt 1      | 0.78 | 3.27   | 0.045 |
| 144. BD (1) C 17- C 22 | 259. RY (12) Pt 1      | 1.03 | 3.25   | 0.052 |
| 144. BD (1) C 17- C 22 | 260. RY (13) Pt 1      | 2.93 | 7.84   | 0.135 |
| 144. BD (1) C 17- C 22 | 261. RY (14) Pt 1      | 0.23 | 2.80   | 0.023 |
| 144. BD (1) C 17- C 22 | 262. RY (15) Pt 1      | 2.04 | 3.63   | 0.077 |
| 144. BD (1) C 17- C 22 | 263. RY (16) Pt 1      | 1.21 | 3.44   | 0.057 |
| 144. BD (1) C 17- C 22 | 264. RY (17) Pt 1      | 0.12 | 2.93   | 0.017 |
| 144. BD (1) C 17- C 22 | 265. RY (18) Pt 1      | 0.90 | 4.16   | 0.055 |
| 144. BD (1) C 17- C 22 | 266. RY (19) Pt 1      | 1.05 | 4.14   | 0.059 |
| 144. BD (1) C 17- C 22 | 267. RY (20) Pt 1      | 1.96 | 4.65   | 0.085 |
| 144. BD (1) C 17- C 22 | 270. RY (23) Pt 1      | 0.10 | 2.63   | 0.015 |
| 144. BD (1) C 17- C 22 | 271. RY (24) Pt 1      | 2.32 | 5.39   | 0.100 |
| 144. BD (1) C 17- C 22 | 272. RY (25) Pt 1      | 0.09 | 2.77   | 0.014 |
| 144. BD (1) C 17- C 22 | 273. RY (26) Pt 1      | 4.44 | 37.49  | 0.364 |
| 144. BD (1) C 17- C 22 | 274. RY (27) Pt 1      | 0.44 | 27.74  | 0.099 |
| 144. BD (1) C 17- C 22 | 276. RY (29) Pt 1      | 1.95 | 237.19 | 0.607 |
| 144. BD (1) C 17- C 22 | 278. RY (1) S 2        | 0.05 | 1.57   | 0.008 |
| 144. BD (1) C 17- C 22 | 279. RY (2) S 2        | 0.72 | 1.86   | 0.033 |

|                        |                        |      |        |       |
|------------------------|------------------------|------|--------|-------|
| 144. BD (1) C 17- C 22 | 280. RY (3) S 2        | 0.17 | 1.55   | 0.015 |
| 144. BD (1) C 17- C 22 | 281. RY (4) S 2        | 1.31 | 2.12   | 0.047 |
| 144. BD (1) C 17- C 22 | 282. RY (5) S 2        | 3.29 | 5.58   | 0.121 |
| 144. BD (1) C 17- C 22 | 283. RY (6) S 2        | 1.47 | 2.27   | 0.052 |
| 144. BD (1) C 17- C 22 | 284. RY (7) S 2        | 0.43 | 2.35   | 0.028 |
| 144. BD (1) C 17- C 22 | 285. RY (8) S 2        | 0.51 | 2.46   | 0.032 |
| 144. BD (1) C 17- C 22 | 286. RY (9) S 2        | 0.47 | 2.75   | 0.032 |
| 144. BD (1) C 17- C 22 | 287. RY (10) S 2       | 0.14 | 2.56   | 0.017 |
| 144. BD (1) C 17- C 22 | 289. RY (12) S 2       | 0.20 | 3.60   | 0.024 |
| 144. BD (1) C 17- C 22 | 292. RY (15) S 2       | 0.06 | 2.80   | 0.012 |
| 144. BD (1) C 17- C 22 | 293. RY (16) S 2       | 0.31 | 3.54   | 0.029 |
| 144. BD (1) C 17- C 22 | 294. RY (17) S 2       | 0.23 | 3.65   | 0.026 |
| 144. BD (1) C 17- C 22 | 297. RY (20) S 2       | 0.39 | 4.10   | 0.036 |
| 144. BD (1) C 17- C 22 | 298. RY (21) S 2       | 0.06 | 3.38   | 0.012 |
| 144. BD (1) C 17- C 22 | 299. RY (22) S 2       | 0.83 | 4.96   | 0.057 |
| 144. BD (1) C 17- C 22 | 300. RY (23) S 2       | 0.08 | 3.14   | 0.014 |
| 144. BD (1) C 17- C 22 | 307. RY (2) S 3        | 0.42 | 1.59   | 0.023 |
| 144. BD (1) C 17- C 22 | 308. RY (3) S 3        | 0.22 | 1.60   | 0.017 |
| 144. BD (1) C 17- C 22 | 309. RY (4) S 3        | 1.16 | 2.00   | 0.043 |
| 144. BD (1) C 17- C 22 | 310. RY (5) S 3        | 2.84 | 4.20   | 0.098 |
| 144. BD (1) C 17- C 22 | 311. RY (6) S 3        | 3.11 | 4.32   | 0.103 |
| 144. BD (1) C 17- C 22 | 312. RY (7) S 3        | 0.58 | 2.52   | 0.034 |
| 144. BD (1) C 17- C 22 | 313. RY (8) S 3        | 0.14 | 2.29   | 0.016 |
| 144. BD (1) C 17- C 22 | 314. RY (9) S 3        | 0.20 | 2.55   | 0.020 |
| 144. BD (1) C 17- C 22 | 315. RY (10) S 3       | 0.21 | 2.60   | 0.021 |
| 144. BD (1) C 17- C 22 | 317. RY (12) S 3       | 0.22 | 3.60   | 0.025 |
| 144. BD (1) C 17- C 22 | 318. RY (13) S 3       | 0.06 | 2.88   | 0.011 |
| 144. BD (1) C 17- C 22 | 322. RY (17) S 3       | 0.40 | 4.10   | 0.036 |
| 144. BD (1) C 17- C 22 | 323. RY (18) S 3       | 0.32 | 3.66   | 0.031 |
| 144. BD (1) C 17- C 22 | 325. RY (20) S 3       | 0.62 | 4.14   | 0.045 |
| 144. BD (1) C 17- C 22 | 326. RY (21) S 3       | 0.14 | 3.59   | 0.020 |
| 144. BD (1) C 17- C 22 | 327. RY (22) S 3       | 0.68 | 3.53   | 0.044 |
| 144. BD (1) C 17- C 22 | 328. RY (23) S 3       | 0.11 | 3.19   | 0.016 |
| 144. BD (1) C 17- C 22 | 334. RY (1) S 4        | 0.42 | 1.65   | 0.024 |
| 144. BD (1) C 17- C 22 | 335. RY (2) S 4        | 0.09 | 1.68   | 0.011 |
| 144. BD (1) C 17- C 22 | 341. RY (8) S 4        | 0.17 | 2.18   | 0.017 |
| 144. BD (1) C 17- C 22 | 342. RY (9) S 4        | 0.07 | 2.31   | 0.011 |
| 144. BD (1) C 17- C 22 | 348. RY (15) S 4       | 0.15 | 2.92   | 0.019 |
| 144. BD (1) C 17- C 22 | 350. RY (17) S 4       | 0.15 | 3.34   | 0.020 |
| 144. BD (1) C 17- C 22 | 356. RY (23) S 4       | 0.05 | 3.94   | 0.013 |
| 144. BD (1) C 17- C 22 | 839. RY (1) C 29       | 0.11 | 2.03   | 0.013 |
| 144. BD (1) C 17- C 22 | 840. RY (2) C 29       | 0.60 | 1.79   | 0.029 |
| 144. BD (1) C 17- C 22 | 842. RY (4) C 29       | 0.37 | 2.34   | 0.026 |
| 144. BD (1) C 17- C 22 | 843. RY (5) C 29       | 0.30 | 2.52   | 0.025 |
| 144. BD (1) C 17- C 22 | 845. RY (7) C 29       | 0.05 | 1.95   | 0.009 |
| 144. BD (1) C 17- C 22 | 849. RY (11) C 29      | 0.12 | 2.70   | 0.016 |
| 144. BD (1) C 17- C 22 | 850. RY (12) C 29      | 0.19 | 3.68   | 0.023 |
| 144. BD (1) C 17- C 22 | 851. RY (13) C 29      | 0.09 | 3.44   | 0.016 |
| 144. BD (1) C 17- C 22 | 875. RY (1) C 32       | 0.47 | 1.97   | 0.027 |
| 144. BD (1) C 17- C 22 | 878. RY (4) C 32       | 0.43 | 2.40   | 0.029 |
| 144. BD (1) C 17- C 22 | 880. RY (6) C 32       | 0.12 | 2.12   | 0.014 |
| 144. BD (1) C 17- C 22 | 881. RY (7) C 32       | 0.11 | 2.26   | 0.014 |
| 144. BD (1) C 17- C 22 | 883. RY (9) C 32       | 0.06 | 3.27   | 0.012 |
| 144. BD (1) C 17- C 22 | 885. RY (11) C 32      | 0.23 | 2.89   | 0.023 |
| 144. BD (1) C 17- C 22 | 889. RY (15) C 32      | 0.11 | 4.50   | 0.020 |
| 144. BD (1) C 17- C 22 | 901. RY (1) H 33       | 0.05 | 2.17   | 0.009 |
| 144. BD (1) C 17- C 22 | 902. RY (2) H 33       | 0.07 | 2.76   | 0.013 |
| 144. BD (1) C 17- C 22 | 911. RY (1) C 35       | 0.51 | 1.92   | 0.028 |
| 144. BD (1) C 17- C 22 | 912. RY (2) C 35       | 0.17 | 2.43   | 0.018 |
| 144. BD (1) C 17- C 22 | 914. RY (4) C 35       | 0.67 | 2.41   | 0.036 |
| 144. BD (1) C 17- C 22 | 915. RY (5) C 35       | 0.16 | 2.42   | 0.018 |
| 144. BD (1) C 17- C 22 | 917. RY (7) C 35       | 0.07 | 2.32   | 0.011 |
| 144. BD (1) C 17- C 22 | 918. RY (8) C 35       | 0.13 | 2.61   | 0.017 |
| 144. BD (1) C 17- C 22 | 920. RY (10) C 35      | 0.07 | 2.70   | 0.012 |
| 144. BD (1) C 17- C 22 | 921. RY (11) C 35      | 0.17 | 2.93   | 0.020 |
| 144. BD (1) C 17- C 22 | 923. RY (13) C 35      | 0.21 | 4.31   | 0.027 |
| 144. BD (1) C 17- C 22 | 942. RY (1) H 37       | 0.07 | 1.94   | 0.010 |
| 144. BD (1) C 17- C 22 | 948. RY (2) C 38       | 0.09 | 2.19   | 0.013 |
| 144. BD (1) C 17- C 22 | 952. RY (6) C 38       | 0.27 | 2.24   | 0.022 |
| 144. BD (1) C 17- C 22 | 959. RY (13) C 38      | 0.15 | 3.07   | 0.019 |
| 144. BD (1) C 17- C 22 | 973. RY (1) H 39       | 0.26 | 1.94   | 0.020 |
| 144. BD (1) C 17- C 22 | 975. RY (3) H 39       | 0.10 | 3.17   | 0.016 |
| 144. BD (1) C 17- C 22 | 988. RY (6) C 41       | 0.16 | 2.61   | 0.018 |
| 144. BD (1) C 17- C 22 | 989. RY (7) C 41       | 0.06 | 2.17   | 0.010 |
| 144. BD (1) C 17- C 22 | 991. RY (9) C 41       | 0.08 | 3.06   | 0.014 |
| 144. BD (1) C 17- C 22 | 993. RY (11) C 41      | 0.07 | 3.33   | 0.013 |
| 144. BD (1) C 17- C 22 | 1019. RY (1) C 44      | 0.20 | 1.91   | 0.017 |
| 144. BD (1) C 17- C 22 | 1020. RY (2) C 44      | 0.12 | 2.30   | 0.015 |
| 144. BD (1) C 17- C 22 | 1022. RY (4) C 44      | 0.63 | 2.32   | 0.034 |
| 144. BD (1) C 17- C 22 | 1024. RY (6) C 44      | 0.12 | 2.37   | 0.015 |
| 144. BD (1) C 17- C 22 | 1027. RY (9) C 44      | 0.14 | 2.90   | 0.018 |
| 144. BD (1) C 17- C 22 | 1029. RY (11) C 44     | 0.33 | 3.11   | 0.029 |
| 144. BD (1) C 17- C 22 | 1031. RY (13) C 44     | 0.12 | 4.91   | 0.021 |
| 144. BD (1) C 17- C 22 | 1045. RY (1) H 45      | 0.19 | 1.98   | 0.017 |
| 144. BD (1) C 17- C 22 | 1050. RY (1) H 46      | 0.11 | 1.88   | 0.013 |
| 149. BD (1) C 21- C 22 | 184. BD* (1) Pt 1- S 2 | 0.17 | 0.81   | 0.010 |
| 149. BD (1) C 21- C 22 | 248. RY (1) Pt 1       | 0.08 | 2.59   | 0.013 |
| 149. BD (1) C 21- C 22 | 249. RY (2) Pt 1       | 0.08 | 3.18   | 0.015 |
| 149. BD (1) C 21- C 22 | 252. RY (5) Pt 1       | 0.10 | 3.13   | 0.016 |
| 149. BD (1) C 21- C 22 | 255. RY (8) Pt 1       | 0.15 | 3.05   | 0.019 |
| 149. BD (1) C 21- C 22 | 257. RY (10) Pt 1      | 0.17 | 4.92   | 0.026 |
| 149. BD (1) C 21- C 22 | 258. RY (11) Pt 1      | 0.12 | 3.24   | 0.017 |
| 149. BD (1) C 21- C 22 | 259. RY (12) Pt 1      | 0.10 | 3.22   | 0.016 |
| 149. BD (1) C 21- C 22 | 260. RY (13) Pt 1      | 0.20 | 7.81   | 0.035 |
| 149. BD (1) C 21- C 22 | 262. RY (15) Pt 1      | 0.13 | 3.61   | 0.019 |
| 149. BD (1) C 21- C 22 | 263. RY (16) Pt 1      | 0.09 | 3.41   | 0.015 |
| 149. BD (1) C 21- C 22 | 266. RY (19) Pt 1      | 0.20 | 4.11   | 0.026 |
| 149. BD (1) C 21- C 22 | 267. RY (20) Pt 1      | 0.05 | 4.62   | 0.014 |
| 149. BD (1) C 21- C 22 | 271. RY (24) Pt 1      | 0.22 | 5.36   | 0.031 |
| 149. BD (1) C 21- C 22 | 273. RY (26) Pt 1      | 0.29 | 37.46  | 0.093 |
| 149. BD (1) C 21- C 22 | 276. RY (29) Pt 1      | 0.16 | 237.16 | 0.175 |
| 149. BD (1) C 21- C 22 | 279. RY (2) S 2        | 0.07 | 1.84   | 0.010 |
| 149. BD (1) C 21- C 22 | 281. RY (4) S 2        | 0.05 | 2.10   | 0.010 |

|                        |                        |      |        |       |
|------------------------|------------------------|------|--------|-------|
| 149. BD (1) C 21- C 22 | 282. RY (5) S 2        | 0.19 | 5.55   | 0.029 |
| 149. BD (1) C 21- C 22 | 283. RY (6) S 2        | 0.08 | 2.25   | 0.012 |
| 149. BD (1) C 21- C 22 | 309. RY (4) S 3        | 0.05 | 1.98   | 0.009 |
| 149. BD (1) C 21- C 22 | 310. RY (5) S 3        | 0.13 | 4.18   | 0.021 |
| 149. BD (1) C 21- C 22 | 311. RY (6) S 3        | 0.14 | 4.30   | 0.022 |
| 150. BD (2) C 21- C 22 | 257. RY (10)Pt 1       | 0.08 | 4.47   | 0.017 |
| 150. BD (2) C 21- C 22 | 260. RY (13)Pt 1       | 0.07 | 7.37   | 0.021 |
| 150. BD (2) C 21- C 22 | 273. RY (26)Pt 1       | 0.12 | 37.02  | 0.059 |
| 150. BD (2) C 21- C 22 | 282. RY (5) S 2        | 0.08 | 5.11   | 0.018 |
| 150. BD (2) C 21- C 22 | 310. RY (5) S 3        | 0.08 | 3.73   | 0.016 |
| 150. BD (2) C 21- C 22 | 311. RY (6) S 3        | 0.08 | 3.85   | 0.016 |
| 151. BD (1) C 21- C 23 | 255. RY (8)Pt 1        | 0.05 | 3.07   | 0.011 |
| 151. BD (1) C 21- C 23 | 257. RY (10)Pt 1       | 0.08 | 4.94   | 0.018 |
| 151. BD (1) C 21- C 23 | 260. RY (13)Pt 1       | 0.09 | 7.83   | 0.023 |
| 151. BD (1) C 21- C 23 | 271. RY (24)Pt 1       | 0.05 | 5.38   | 0.015 |
| 151. BD (1) C 21- C 23 | 273. RY (26)Pt 1       | 0.07 | 37.48  | 0.047 |
| 151. BD (1) C 21- C 23 | 276. RY (29)Pt 1       | 0.05 | 237.18 | 0.099 |
| 151. BD (1) C 21- C 23 | 282. RY (5) S 2        | 0.05 | 5.57   | 0.015 |
| 156. BD (1) C 25- C 27 | 184. BD* (1)Pt 1- S 2  | 0.19 | 0.78   | 0.011 |
| 156. BD (1) C 25- C 27 | 252. RY (5)Pt 1        | 0.10 | 3.10   | 0.015 |
| 156. BD (1) C 25- C 27 | 255. RY (8)Pt 1        | 0.09 | 3.02   | 0.015 |
| 156. BD (1) C 25- C 27 | 256. RY (9)Pt 1        | 0.06 | 3.10   | 0.012 |
| 156. BD (1) C 25- C 27 | 257. RY (10)Pt 1       | 0.08 | 4.88   | 0.018 |
| 156. BD (1) C 25- C 27 | 258. RY (11)Pt 1       | 0.05 | 3.21   | 0.012 |
| 156. BD (1) C 25- C 27 | 259. RY (12)Pt 1       | 0.09 | 3.19   | 0.015 |
| 156. BD (1) C 25- C 27 | 260. RY (13)Pt 1       | 0.16 | 7.78   | 0.032 |
| 156. BD (1) C 25- C 27 | 262. RY (15)Pt 1       | 0.08 | 3.58   | 0.015 |
| 156. BD (1) C 25- C 27 | 263. RY (16)Pt 1       | 0.05 | 3.38   | 0.012 |
| 156. BD (1) C 25- C 27 | 266. RY (19)Pt 1       | 0.07 | 4.08   | 0.015 |
| 156. BD (1) C 25- C 27 | 273. RY (26)Pt 1       | 0.25 | 37.43  | 0.087 |
| 156. BD (1) C 25- C 27 | 276. RY (29)Pt 1       | 0.11 | 237.13 | 0.143 |
| 156. BD (1) C 25- C 27 | 281. RY (4) S 2        | 0.06 | 2.06   | 0.010 |
| 156. BD (1) C 25- C 27 | 282. RY (5) S 2        | 0.18 | 5.52   | 0.028 |
| 156. BD (1) C 25- C 27 | 283. RY (6) S 2        | 0.06 | 2.22   | 0.010 |
| 156. BD (1) C 25- C 27 | 310. RY (5) S 3        | 0.09 | 4.14   | 0.018 |
| 156. BD (1) C 25- C 27 | 311. RY (6) S 3        | 0.15 | 4.26   | 0.023 |
| 157. BD (1) C 27- H 28 | 184. BD* (1)Pt 1- S 2  | 0.85 | 0.71   | 0.022 |
| 157. BD (1) C 27- H 28 | 185. BD* (1)Pt 1- S 3  | 0.71 | 0.72   | 0.020 |
| 157. BD (1) C 27- H 28 | 188. BD* (1) S 3- C 32 | 0.05 | 0.66   | 0.005 |
| 157. BD (1) C 27- H 28 | 248. RY (1)Pt 1        | 0.47 | 2.49   | 0.031 |
| 157. BD (1) C 27- H 28 | 249. RY (2)Pt 1        | 0.30 | 3.08   | 0.027 |
| 157. BD (1) C 27- H 28 | 252. RY (5)Pt 1        | 0.42 | 3.03   | 0.032 |
| 157. BD (1) C 27- H 28 | 253. RY (6)Pt 1        | 0.20 | 3.49   | 0.023 |
| 157. BD (1) C 27- H 28 | 255. RY (8)Pt 1        | 0.38 | 2.96   | 0.030 |
| 157. BD (1) C 27- H 28 | 256. RY (9)Pt 1        | 0.33 | 3.04   | 0.028 |
| 157. BD (1) C 27- H 28 | 257. RY (10)Pt 1       | 0.73 | 4.82   | 0.053 |
| 157. BD (1) C 27- H 28 | 258. RY (11)Pt 1       | 0.14 | 3.15   | 0.019 |
| 157. BD (1) C 27- H 28 | 259. RY (12)Pt 1       | 0.16 | 3.13   | 0.020 |
| 157. BD (1) C 27- H 28 | 260. RY (13)Pt 1       | 0.67 | 7.72   | 0.064 |
| 157. BD (1) C 27- H 28 | 262. RY (15)Pt 1       | 0.67 | 3.51   | 0.043 |
| 157. BD (1) C 27- H 28 | 263. RY (16)Pt 1       | 0.34 | 3.32   | 0.030 |
| 157. BD (1) C 27- H 28 | 265. RY (18)Pt 1       | 0.26 | 4.04   | 0.029 |
| 157. BD (1) C 27- H 28 | 266. RY (19)Pt 1       | 0.44 | 4.02   | 0.038 |
| 157. BD (1) C 27- H 28 | 267. RY (20)Pt 1       | 0.26 | 4.53   | 0.031 |
| 157. BD (1) C 27- H 28 | 271. RY (24)Pt 1       | 0.37 | 5.27   | 0.040 |
| 157. BD (1) C 27- H 28 | 272. RY (25)Pt 1       | 0.09 | 2.66   | 0.014 |
| 157. BD (1) C 27- H 28 | 273. RY (26)Pt 1       | 1.11 | 37.37  | 0.182 |
| 157. BD (1) C 27- H 28 | 276. RY (29)Pt 1       | 0.35 | 237.07 | 0.259 |
| 157. BD (1) C 27- H 28 | 279. RY (2) S 2        | 0.20 | 1.74   | 0.017 |
| 157. BD (1) C 27- H 28 | 280. RY (3) S 2        | 0.06 | 1.43   | 0.008 |
| 157. BD (1) C 27- H 28 | 281. RY (4) S 2        | 0.39 | 2.00   | 0.025 |
| 157. BD (1) C 27- H 28 | 282. RY (5) S 2        | 0.94 | 5.46   | 0.064 |
| 157. BD (1) C 27- H 28 | 283. RY (6) S 2        | 0.47 | 2.15   | 0.028 |
| 157. BD (1) C 27- H 28 | 284. RY (7) S 2        | 0.13 | 2.23   | 0.015 |
| 157. BD (1) C 27- H 28 | 285. RY (8) S 2        | 0.13 | 2.34   | 0.015 |
| 157. BD (1) C 27- H 28 | 286. RY (9) S 2        | 0.15 | 2.63   | 0.018 |
| 157. BD (1) C 27- H 28 | 289. RY (12) S 2       | 0.05 | 3.49   | 0.012 |
| 157. BD (1) C 27- H 28 | 293. RY (16) S 2       | 0.08 | 3.42   | 0.014 |
| 157. BD (1) C 27- H 28 | 294. RY (17) S 2       | 0.06 | 3.53   | 0.013 |
| 157. BD (1) C 27- H 28 | 297. RY (20) S 2       | 0.09 | 3.98   | 0.016 |
| 157. BD (1) C 27- H 28 | 299. RY (22) S 2       | 0.20 | 4.84   | 0.027 |
| 157. BD (1) C 27- H 28 | 307. RY (2) S 3        | 0.10 | 1.47   | 0.011 |
| 157. BD (1) C 27- H 28 | 308. RY (3) S 3        | 0.05 | 1.48   | 0.008 |
| 157. BD (1) C 27- H 28 | 309. RY (4) S 3        | 0.18 | 1.88   | 0.017 |
| 157. BD (1) C 27- H 28 | 310. RY (5) S 3        | 0.59 | 4.08   | 0.044 |
| 157. BD (1) C 27- H 28 | 311. RY (6) S 3        | 1.03 | 4.20   | 0.059 |
| 157. BD (1) C 27- H 28 | 312. RY (7) S 3        | 0.17 | 2.41   | 0.018 |
| 157. BD (1) C 27- H 28 | 313. RY (8) S 3        | 0.05 | 2.17   | 0.010 |
| 157. BD (1) C 27- H 28 | 315. RY (10) S 3       | 0.11 | 2.48   | 0.015 |
| 157. BD (1) C 27- H 28 | 317. RY (12) S 3       | 0.17 | 3.48   | 0.022 |
| 157. BD (1) C 27- H 28 | 322. RY (17) S 3       | 0.16 | 3.98   | 0.023 |
| 157. BD (1) C 27- H 28 | 323. RY (18) S 3       | 0.12 | 3.54   | 0.018 |
| 157. BD (1) C 27- H 28 | 325. RY (20) S 3       | 0.23 | 4.02   | 0.027 |
| 157. BD (1) C 27- H 28 | 327. RY (22) S 3       | 0.21 | 3.41   | 0.024 |
| 157. BD (1) C 27- H 28 | 334. RY (1) S 4        | 0.12 | 1.53   | 0.012 |
| 157. BD (1) C 27- H 28 | 840. RY (2) C 29       | 0.16 | 1.67   | 0.015 |
| 157. BD (1) C 27- H 28 | 842. RY (4) C 29       | 0.09 | 2.22   | 0.013 |
| 157. BD (1) C 27- H 28 | 843. RY (5) C 29       | 0.08 | 2.40   | 0.012 |
| 157. BD (1) C 27- H 28 | 875. RY (1) C 32       | 0.11 | 1.85   | 0.013 |
| 157. BD (1) C 27- H 28 | 878. RY (4) C 32       | 0.11 | 2.29   | 0.014 |
| 157. BD (1) C 27- H 28 | 885. RY (11) C 32      | 0.06 | 2.77   | 0.012 |
| 157. BD (1) C 27- H 28 | 911. RY (1) C 35       | 0.15 | 1.80   | 0.015 |
| 157. BD (1) C 27- H 28 | 912. RY (2) C 35       | 0.06 | 2.31   | 0.010 |
| 157. BD (1) C 27- H 28 | 914. RY (4) C 35       | 0.19 | 2.29   | 0.019 |
| 157. BD (1) C 27- H 28 | 923. RY (13) C 35      | 0.06 | 4.19   | 0.014 |
| 157. BD (1) C 27- H 28 | 952. RY (6) C 38       | 0.06 | 2.12   | 0.010 |
| 157. BD (1) C 27- H 28 | 973. RY (1) H 39       | 0.05 | 1.82   | 0.009 |
| 157. BD (1) C 27- H 28 | 988. RY (6) C 41       | 0.05 | 2.50   | 0.010 |
| 157. BD (1) C 27- H 28 | 1019. RY (1) C 44      | 0.08 | 1.79   | 0.010 |
| 157. BD (1) C 27- H 28 | 1022. RY (4) C 44      | 0.16 | 2.20   | 0.017 |
| 157. BD (1) C 27- H 28 | 1029. RY (11) C 44     | 0.08 | 2.99   | 0.014 |

|                        |                          |      |       |       |  |  |
|------------------------|--------------------------|------|-------|-------|--|--|
| from unit 2 to unit 3  |                          |      |       |       |  |  |
| 92. LP (1) N 7         | 1064. RY (10)Sb 47       | 0.18 | 2.53  | 0.019 |  |  |
| 92. LP (1) N 7         | 1066. RY (12)Sb 47       | 0.53 | 1.84  | 0.028 |  |  |
| 92. LP (1) N 7         | 1067. RY (13)Sb 47       | 0.65 | 1.83  | 0.031 |  |  |
| 92. LP (1) N 7         | 1070. RY (16)Sb 47       | 0.88 | 5.17  | 0.060 |  |  |
| 92. LP (1) N 7         | 1071. RY (17)Sb 47       | 0.27 | 2.26  | 0.022 |  |  |
| 92. LP (1) N 7         | 1075. RY (21)Sb 47       | 0.08 | 3.12  | 0.014 |  |  |
| 92. LP (1) N 7         | 1076. RY (22)Sb 47       | 0.12 | 10.31 | 0.031 |  |  |
| 92. LP (1) N 7         | 1083. RY (29)Sb 47       | 0.05 | 34.02 | 0.038 |  |  |
| 92. LP (1) N 7         | 1181. RY ( 6)Cl 51       | 0.11 | 2.01  | 0.013 |  |  |
| 93. LP (1) N 8         | 1064. RY (10)Sb 47       | 0.23 | 2.53  | 0.021 |  |  |
| 93. LP (1) N 8         | 1065. RY (11)Sb 47       | 0.06 | 2.78  | 0.012 |  |  |
| 93. LP (1) N 8         | 1066. RY (12)Sb 47       | 0.50 | 1.84  | 0.027 |  |  |
| 93. LP (1) N 8         | 1067. RY (13)Sb 47       | 0.78 | 1.82  | 0.034 |  |  |
| 93. LP (1) N 8         | 1069. RY (15)Sb 47       | 0.08 | 1.68  | 0.010 |  |  |
| 93. LP (1) N 8         | 1070. RY (16)Sb 47       | 0.94 | 5.16  | 0.062 |  |  |
| 93. LP (1) N 8         | 1071. RY (17)Sb 47       | 0.38 | 2.26  | 0.026 |  |  |
| 93. LP (1) N 8         | 1075. RY (21)Sb 47       | 0.07 | 3.12  | 0.013 |  |  |
| 93. LP (1) N 8         | 1076. RY (22)Sb 47       | 0.13 | 10.30 | 0.033 |  |  |
| 93. LP (1) N 8         | 1083. RY (29)Sb 47       | 0.06 | 34.02 | 0.041 |  |  |
| 93. LP (1) N 8         | 1085. RY (31)Sb 47       | 0.06 | 2.21  | 0.010 |  |  |
| 93. LP (1) N 8         | 1176. RY ( 1)Cl 51       | 0.05 | 1.86  | 0.009 |  |  |
| 93. LP (1) N 8         | 1181. RY ( 6)Cl 51       | 0.11 | 2.01  | 0.013 |  |  |
| 129. BD (2) N 7- C 10  | 1059. RY ( 5)Sb 47       | 0.11 | 1.69  | 0.012 |  |  |
| 133. BD (2) N 8- C 27  | 1060. RY ( 6)Sb 47       | 0.08 | 1.22  | 0.009 |  |  |
| 135. BD (1) C 10- H 11 | 1067. RY (13)Sb 47       | 0.07 | 1.94  | 0.010 |  |  |
| 135. BD (1) C 10- H 11 | 1070. RY (16)Sb 47       | 0.09 | 5.28  | 0.019 |  |  |
| 142. BD (1) C 16- C 17 | 240. BD* ( 1)Sb 47-Cl 51 | 0.06 | 0.80  | 0.006 |  |  |
| 144. BD (1) C 17- C 22 | 1064. RY (10)Sb 47       | 0.06 | 2.76  | 0.011 |  |  |
| 144. BD (1) C 17- C 22 | 1066. RY (12)Sb 47       | 0.15 | 2.07  | 0.016 |  |  |
| 144. BD (1) C 17- C 22 | 1067. RY (13)Sb 47       | 0.20 | 2.05  | 0.018 |  |  |
| 144. BD (1) C 17- C 22 | 1070. RY (16)Sb 47       | 0.37 | 5.39  | 0.040 |  |  |
| 144. BD (1) C 17- C 22 | 1071. RY (17)Sb 47       | 0.10 | 2.49  | 0.014 |  |  |
| 144. BD (1) C 17- C 22 | 1076. RY (22)Sb 47       | 0.06 | 10.53 | 0.022 |  |  |
| 149. BD (1) C 21- C 22 | 240. BD* ( 1)Sb 47-Cl 51 | 0.07 | 0.83  | 0.007 |  |  |
| 157. BD (1) C 27- H 28 | 1067. RY (13)Sb 47       | 0.06 | 1.93  | 0.010 |  |  |
| 157. BD (1) C 27- H 28 | 1070. RY (16)Sb 47       | 0.08 | 5.27  | 0.018 |  |  |
| from unit 2 to unit 4  |                          |      |       |       |  |  |
| 92. LP (1) N 7         | 1092. RY ( 1)Cl 48       | 0.13 | 1.30  | 0.012 |  |  |
| 92. LP (1) N 7         | 1093. RY ( 2)Cl 48       | 0.11 | 1.72  | 0.013 |  |  |
| 92. LP (1) N 7         | 1098. RY ( 7)Cl 48       | 0.25 | 2.12  | 0.021 |  |  |
| 92. LP (1) N 7         | 1100. RY ( 9)Cl 48       | 0.14 | 1.51  | 0.013 |  |  |
| 93. LP (1) N 8         | 1092. RY ( 1)Cl 48       | 0.14 | 1.29  | 0.012 |  |  |
| 93. LP (1) N 8         | 1093. RY ( 2)Cl 48       | 0.07 | 1.72  | 0.010 |  |  |
| 93. LP (1) N 8         | 1098. RY ( 7)Cl 48       | 0.20 | 2.12  | 0.019 |  |  |
| 93. LP (1) N 8         | 1100. RY ( 9)Cl 48       | 0.15 | 1.51  | 0.013 |  |  |
| 144. BD (1) C 17- C 22 | 1098. RY ( 7)Cl 48       | 0.08 | 2.35  | 0.012 |  |  |
| from unit 2 to unit 5  |                          |      |       |       |  |  |
| 92. LP (1) N 7         | 1124. RY ( 5)Cl 49       | 0.07 | 2.34  | 0.012 |  |  |
| 92. LP (1) N 7         | 1127. RY ( 8)Cl 49       | 0.06 | 2.99  | 0.012 |  |  |
| 93. LP (1) N 8         | 1124. RY ( 5)Cl 49       | 0.09 | 2.33  | 0.013 |  |  |
| from unit 2 to unit 6  |                          |      |       |       |  |  |
| 92. LP (1) N 7         | 1148. RY ( 1)Cl 50       | 0.12 | 1.32  | 0.011 |  |  |
| 92. LP (1) N 7         | 1153. RY ( 6)Cl 50       | 0.26 | 1.73  | 0.019 |  |  |
| 92. LP (1) N 7         | 1154. RY ( 7)Cl 50       | 0.27 | 1.81  | 0.020 |  |  |
| 92. LP (1) N 7         | 1155. RY ( 8)Cl 50       | 0.28 | 2.73  | 0.025 |  |  |
| 92. LP (1) N 7         | 1156. RY ( 9)Cl 50       | 0.18 | 1.89  | 0.016 |  |  |
| 93. LP (1) N 8         | 1148. RY ( 1)Cl 50       | 0.11 | 1.32  | 0.011 |  |  |
| 93. LP (1) N 8         | 1153. RY ( 6)Cl 50       | 0.22 | 1.72  | 0.017 |  |  |
| 93. LP (1) N 8         | 1154. RY ( 7)Cl 50       | 0.35 | 1.81  | 0.022 |  |  |
| 93. LP (1) N 8         | 1155. RY ( 8)Cl 50       | 0.38 | 2.73  | 0.029 |  |  |
| 93. LP (1) N 8         | 1156. RY ( 9)Cl 50       | 0.15 | 1.88  | 0.015 |  |  |
| 144. BD (1) C 17- C 22 | 1153. RY ( 6)Cl 50       | 0.08 | 1.95  | 0.011 |  |  |
| 144. BD (1) C 17- C 22 | 1154. RY ( 7)Cl 50       | 0.08 | 2.04  | 0.012 |  |  |
| 144. BD (1) C 17- C 22 | 1155. RY ( 8)Cl 50       | 0.11 | 2.96  | 0.016 |  |  |
| 144. BD (1) C 17- C 22 | 1156. RY ( 9)Cl 50       | 0.07 | 2.11  | 0.011 |  |  |
| from unit 2 to unit 7  |                          |      |       |       |  |  |
| 92. LP (1) N 7         | 1204. RY ( 1)Cl 52       | 0.11 | 1.35  | 0.011 |  |  |
| 92. LP (1) N 7         | 1205. RY ( 2)Cl 52       | 0.28 | 2.03  | 0.021 |  |  |
| 93. LP (1) N 8         | 1204. RY ( 1)Cl 52       | 0.15 | 1.34  | 0.013 |  |  |
| 93. LP (1) N 8         | 1205. RY ( 2)Cl 52       | 0.41 | 2.02  | 0.026 |  |  |
| 93. LP (1) N 8         | 1208. RY ( 5)Cl 52       | 0.07 | 2.77  | 0.013 |  |  |
| 93. LP (1) N 8         | 1210. RY ( 7)Cl 52       | 0.07 | 2.46  | 0.012 |  |  |
| 144. BD (1) C 17- C 22 | 1205. RY ( 2)Cl 52       | 0.13 | 2.25  | 0.015 |  |  |
| from unit 2 to unit 8  |                          |      |       |       |  |  |
| None above threshold   |                          |      |       |       |  |  |
| from unit 3 to unit 1  |                          |      |       |       |  |  |
| 43. CR (1)Sb 47        | 248. RY ( 1)Pt 1         | 0.23 | 8.28  | 0.039 |  |  |
| 43. CR (1)Sb 47        | 252. RY ( 5)Pt 1         | 0.22 | 8.82  | 0.039 |  |  |
| 47. CR (5)Sb 47        | 252. RY ( 5)Pt 1         | 0.10 | 4.19  | 0.018 |  |  |
| 68. CR (2)Cl 51        | 248. RY ( 1)Pt 1         | 0.06 | 16.33 | 0.028 |  |  |
| 68. CR (2)Cl 51        | 252. RY ( 5)Pt 1         | 0.05 | 16.87 | 0.026 |  |  |
| 96. LP (1)Sb 47        | 249. RY ( 2)Pt 1         | 0.15 | 2.83  | 0.018 |  |  |
| 96. LP (1)Sb 47        | 251. RY ( 4)Pt 1         | 0.26 | 2.31  | 0.022 |  |  |
| 96. LP (1)Sb 47        | 254. RY ( 7)Pt 1         | 0.41 | 2.10  | 0.026 |  |  |
| 96. LP (1)Sb 47        | 257. RY (10)Pt 1         | 0.15 | 4.57  | 0.024 |  |  |
| 96. LP (1)Sb 47        | 258. RY (11)Pt 1         | 0.09 | 2.90  | 0.015 |  |  |
| 96. LP (1)Sb 47        | 262. RY (15)Pt 1         | 0.06 | 3.26  | 0.012 |  |  |
| 96. LP (1)Sb 47        | 263. RY (16)Pt 1         | 0.21 | 3.07  | 0.022 |  |  |
| 96. LP (1)Sb 47        | 265. RY (18)Pt 1         | 0.11 | 3.79  | 0.018 |  |  |
| 96. LP (1)Sb 47        | 267. RY (20)Pt 1         | 0.11 | 4.28  | 0.019 |  |  |
| 96. LP (1)Sb 47        | 269. RY (22)Pt 1         | 0.11 | 2.37  | 0.014 |  |  |
| 96. LP (1)Sb 47        | 271. RY (24)Pt 1         | 0.14 | 5.02  | 0.023 |  |  |
| 96. LP (1)Sb 47        | 273. RY (26)Pt 1         | 0.30 | 37.12 | 0.095 |  |  |
| 96. LP (1)Sb 47        | 277. RY (30)Pt 1         | 0.13 | 27.45 | 0.053 |  |  |
| 96. LP (1)Sb 47        | 281. RY ( 4) S 2         | 0.16 | 1.75  | 0.015 |  |  |
| 96. LP (1)Sb 47        | 282. RY ( 5) S 2         | 0.36 | 5.21  | 0.038 |  |  |

|                         |                         |      |        |       |
|-------------------------|-------------------------|------|--------|-------|
| 96. LP ( 1)Sb 47        | 283. RY ( 6) S 2        | 0.29 | 1.90   | 0.021 |
| 96. LP ( 1)Sb 47        | 286. RY ( 9) S 2        | 0.09 | 2.38   | 0.013 |
| 96. LP ( 1)Sb 47        | 297. RY (20) S 2        | 0.07 | 3.73   | 0.014 |
| 96. LP ( 1)Sb 47        | 309. RY ( 4) S 3        | 0.12 | 1.63   | 0.013 |
| 96. LP ( 1)Sb 47        | 310. RY ( 5) S 3        | 0.37 | 3.83   | 0.034 |
| 96. LP ( 1)Sb 47        | 311. RY ( 6) S 3        | 0.41 | 3.95   | 0.036 |
| 96. LP ( 1)Sb 47        | 315. RY (10) S 3        | 0.05 | 2.23   | 0.010 |
| 96. LP ( 1)Sb 47        | 325. RY (20) S 3        | 0.05 | 3.77   | 0.012 |
| 96. LP ( 1)Sb 47        | 327. RY (22) S 3        | 0.08 | 3.16   | 0.015 |
| 96. LP ( 1)Sb 47        | 334. RY ( 1) S 4        | 0.11 | 1.28   | 0.010 |
| 96. LP ( 1)Sb 47        | 341. RY ( 8) S 4        | 0.09 | 1.81   | 0.011 |
| 96. LP ( 1)Sb 47        | 840. RY ( 2) C 29       | 0.05 | 1.42   | 0.008 |
| 96. LP ( 1)Sb 47        | 842. RY ( 4) C 29       | 0.13 | 1.97   | 0.014 |
| 96. LP ( 1)Sb 47        | 875. RY ( 1) C 32       | 0.09 | 1.60   | 0.011 |
| 96. LP ( 1)Sb 47        | 878. RY ( 4) C 32       | 0.09 | 2.03   | 0.012 |
| 96. LP ( 1)Sb 47        | 952. RY ( 6) C 38       | 0.07 | 1.87   | 0.010 |
| 96. LP ( 1)Sb 47        | 1022. RY ( 4) C 44      | 0.06 | 1.95   | 0.009 |
| 109. LP ( 1)Cl 51       | 184. BD* ( 1)Pt 1- S 2  | 0.12 | 0.79   | 0.009 |
| 109. LP ( 1)Cl 51       | 185. BD* ( 1)Pt 1- S 3  | 0.12 | 0.79   | 0.009 |
| 109. LP ( 1)Cl 51       | 252. RY ( 5)Pt 1        | 0.18 | 3.11   | 0.021 |
| 109. LP ( 1)Cl 51       | 255. RY ( 8)Pt 1        | 0.06 | 3.03   | 0.012 |
| 109. LP ( 1)Cl 51       | 256. RY ( 9)Pt 1        | 0.07 | 3.11   | 0.013 |
| 109. LP ( 1)Cl 51       | 257. RY (10)Pt 1        | 0.13 | 4.90   | 0.023 |
| 109. LP ( 1)Cl 51       | 260. RY (13)Pt 1        | 0.08 | 7.79   | 0.023 |
| 109. LP ( 1)Cl 51       | 262. RY (15)Pt 1        | 0.08 | 3.59   | 0.015 |
| 109. LP ( 1)Cl 51       | 267. RY (20)Pt 1        | 0.06 | 4.60   | 0.015 |
| 109. LP ( 1)Cl 51       | 271. RY (24)Pt 1        | 0.06 | 5.34   | 0.016 |
| 109. LP ( 1)Cl 51       | 273. RY (26)Pt 1        | 0.12 | 37.44  | 0.060 |
| 109. LP ( 1)Cl 51       | 281. RY ( 4) S 2        | 0.06 | 2.07   | 0.010 |
| 109. LP ( 1)Cl 51       | 282. RY ( 5) S 2        | 0.13 | 5.53   | 0.024 |
| 109. LP ( 1)Cl 51       | 283. RY ( 6) S 2        | 0.07 | 2.23   | 0.011 |
| 109. LP ( 1)Cl 51       | 310. RY ( 5) S 3        | 0.10 | 4.16   | 0.018 |
| 109. LP ( 1)Cl 51       | 311. RY ( 6) S 3        | 0.14 | 4.28   | 0.022 |
| 173. BD ( 1)Sb 47-cl 51 | 248. RY ( 1)Pt 1        | 2.32 | 2.30   | 0.065 |
| 173. BD ( 1)Sb 47-cl 51 | 252. RY ( 5)Pt 1        | 0.20 | 2.84   | 0.021 |
| 173. BD ( 1)Sb 47-cl 51 | 253. RY ( 6)Pt 1        | 0.15 | 3.29   | 0.020 |
| 173. BD ( 1)Sb 47-cl 51 | 254. RY ( 7)Pt 1        | 0.15 | 2.15   | 0.016 |
| 173. BD ( 1)Sb 47-cl 51 | 255. RY ( 8)Pt 1        | 0.23 | 2.76   | 0.022 |
| 173. BD ( 1)Sb 47-cl 51 | 256. RY ( 9)Pt 1        | 0.13 | 2.84   | 0.017 |
| 173. BD ( 1)Sb 47-cl 51 | 257. RY (10)Pt 1        | 0.20 | 4.63   | 0.027 |
| 173. BD ( 1)Sb 47-cl 51 | 260. RY (13)Pt 1        | 0.29 | 7.52   | 0.042 |
| 173. BD ( 1)Sb 47-cl 51 | 262. RY (15)Pt 1        | 0.10 | 3.32   | 0.016 |
| 173. BD ( 1)Sb 47-cl 51 | 263. RY (16)Pt 1        | 0.16 | 3.12   | 0.020 |
| 173. BD ( 1)Sb 47-cl 51 | 266. RY (19)Pt 1        | 0.06 | 3.82   | 0.014 |
| 173. BD ( 1)Sb 47-cl 51 | 267. RY (20)Pt 1        | 0.08 | 4.33   | 0.017 |
| 173. BD ( 1)Sb 47-cl 51 | 271. RY (24)Pt 1        | 0.07 | 5.07   | 0.017 |
| 173. BD ( 1)Sb 47-cl 51 | 272. RY (25)Pt 1        | 0.05 | 2.46   | 0.010 |
| 173. BD ( 1)Sb 47-cl 51 | 273. RY (26)Pt 1        | 0.27 | 37.17  | 0.090 |
| 173. BD ( 1)Sb 47-cl 51 | 276. RY (29)Pt 1        | 0.07 | 236.87 | 0.112 |
| 173. BD ( 1)Sb 47-cl 51 | 279. RY ( 2) S 2        | 0.07 | 1.55   | 0.009 |
| 173. BD ( 1)Sb 47-cl 51 | 281. RY ( 4) S 2        | 0.12 | 1.81   | 0.013 |
| 173. BD ( 1)Sb 47-cl 51 | 282. RY ( 5) S 2        | 0.29 | 5.26   | 0.035 |
| 173. BD ( 1)Sb 47-cl 51 | 283. RY ( 6) S 2        | 0.13 | 1.96   | 0.014 |
| 173. BD ( 1)Sb 47-cl 51 | 299. RY (22) S 2        | 0.06 | 4.64   | 0.015 |
| 173. BD ( 1)Sb 47-cl 51 | 309. RY ( 4) S 3        | 0.10 | 1.69   | 0.012 |
| 173. BD ( 1)Sb 47-cl 51 | 310. RY ( 5) S 3        | 0.22 | 3.89   | 0.026 |
| 173. BD ( 1)Sb 47-cl 51 | 311. RY ( 6) S 3        | 0.27 | 4.01   | 0.029 |
| 173. BD ( 1)Sb 47-cl 51 | 322. RY (17) S 3        | 0.05 | 3.79   | 0.013 |
| 173. BD ( 1)Sb 47-cl 51 | 325. RY (20) S 3        | 0.05 | 3.83   | 0.013 |
| 173. BD ( 1)Sb 47-cl 51 | 840. RY ( 2) C 29       | 0.06 | 1.47   | 0.008 |
| 173. BD ( 1)Sb 47-cl 51 | 911. RY ( 1) C 35       | 0.05 | 1.60   | 0.008 |
| 173. BD ( 1)Sb 47-cl 51 | 914. RY ( 4) C 35       | 0.09 | 2.09   | 0.012 |
| 173. BD ( 1)Sb 47-cl 51 | 1022. RY ( 4) C 44      | 0.06 | 2.00   | 0.009 |
| from unit 3 to unit 2   |                         |      |        |       |
| 96. LP ( 1)Sb 47        | 196. BD* ( 2) N 7- C 10 | 0.05 | 0.27   | 0.003 |
| 96. LP ( 1)Sb 47        | 414. RY ( 1) N 7        | 0.27 | 4.77   | 0.032 |
| 96. LP ( 1)Sb 47        | 415. RY ( 2) N 7        | 0.17 | 1.30   | 0.013 |
| 96. LP ( 1)Sb 47        | 416. RY ( 3) N 7        | 0.11 | 1.81   | 0.013 |
| 96. LP ( 1)Sb 47        | 426. RY (13) N 7        | 0.05 | 4.34   | 0.013 |
| 96. LP ( 1)Sb 47        | 440. RY ( 1) N 8        | 0.28 | 4.70   | 0.032 |
| 96. LP ( 1)Sb 47        | 441. RY ( 2) N 8        | 0.18 | 1.44   | 0.014 |
| 96. LP ( 1)Sb 47        | 442. RY ( 3) N 8        | 0.07 | 1.79   | 0.010 |
| 96. LP ( 1)Sb 47        | 452. RY (13) N 8        | 0.09 | 3.84   | 0.016 |
| 96. LP ( 1)Sb 47        | 611. RY ( 1) C 17       | 0.15 | 2.59   | 0.017 |
| 96. LP ( 1)Sb 47        | 613. RY ( 3) C 17       | 0.13 | 1.52   | 0.013 |
| 96. LP ( 1)Sb 47        | 614. RY ( 4) C 17       | 0.17 | 2.89   | 0.020 |
| 96. LP ( 1)Sb 47        | 615. RY ( 5) C 17       | 0.11 | 3.27   | 0.017 |
| 96. LP ( 1)Sb 47        | 616. RY ( 6) C 17       | 0.08 | 2.66   | 0.013 |
| 96. LP ( 1)Sb 47        | 622. RY (12) C 17       | 0.14 | 3.55   | 0.020 |
| 96. LP ( 1)Sb 47        | 720. RY ( 1) C 22       | 0.10 | 2.43   | 0.014 |
| 96. LP ( 1)Sb 47        | 721. RY ( 2) C 22       | 0.06 | 1.99   | 0.010 |
| 96. LP ( 1)Sb 47        | 722. RY ( 3) C 22       | 0.09 | 1.66   | 0.011 |
| 96. LP ( 1)Sb 47        | 723. RY ( 4) C 22       | 0.15 | 2.78   | 0.018 |
| 96. LP ( 1)Sb 47        | 724. RY ( 5) C 22       | 0.05 | 2.77   | 0.011 |
| 96. LP ( 1)Sb 47        | 730. RY (11) C 22       | 0.17 | 3.83   | 0.023 |
| 96. LP ( 1)Sb 47        | 808. RY ( 1) C 27       | 0.08 | 2.23   | 0.012 |
| 96. LP ( 1)Sb 47        | 834. RY ( 1) H 28       | 0.16 | 1.96   | 0.016 |
| 109. LP ( 1)Cl 51       | 414. RY ( 1) N 7        | 0.15 | 5.09   | 0.025 |
| 109. LP ( 1)Cl 51       | 440. RY ( 1) N 8        | 0.15 | 5.03   | 0.025 |
| 109. LP ( 1)Cl 51       | 614. RY ( 4) C 17       | 0.06 | 3.22   | 0.013 |
| 109. LP ( 1)Cl 51       | 723. RY ( 4) C 22       | 0.06 | 3.11   | 0.012 |
| 109. LP ( 1)Cl 51       | 834. RY ( 1) H 28       | 0.05 | 2.28   | 0.010 |
| 173. BD ( 1)Sb 47-cl 51 | 414. RY ( 1) N 7        | 0.27 | 4.82   | 0.032 |
| 173. BD ( 1)Sb 47-cl 51 | 415. RY ( 2) N 7        | 0.16 | 1.36   | 0.013 |
| 173. BD ( 1)Sb 47-cl 51 | 440. RY ( 1) N 8        | 0.29 | 4.76   | 0.033 |
| 173. BD ( 1)Sb 47-cl 51 | 441. RY ( 2) N 8        | 0.19 | 1.50   | 0.015 |
| 173. BD ( 1)Sb 47-cl 51 | 452. RY (13) N 8        | 0.05 | 3.90   | 0.013 |
| 173. BD ( 1)Sb 47-cl 51 | 495. RY ( 4) C 10       | 0.09 | 1.89   | 0.012 |
| 173. BD ( 1)Sb 47-cl 51 | 499. RY ( 8) C 10       | 0.08 | 3.08   | 0.014 |
| 173. BD ( 1)Sb 47-cl 51 | 611. RY ( 1) C 17       | 0.08 | 2.64   | 0.013 |
| 173. BD ( 1)Sb 47-cl 51 | 614. RY ( 4) C 17       | 0.10 | 2.95   | 0.015 |
| 173. BD ( 1)Sb 47-cl 51 | 720. RY ( 1) C 22       | 0.09 | 2.48   | 0.013 |

|                         |                          |       |        |       |
|-------------------------|--------------------------|-------|--------|-------|
| 173. BD ( 1)Sb 47-C1 51 | 723. RY ( 4) C 22        | 0.13  | 2.84   | 0.017 |
| 173. BD ( 1)Sb 47-C1 51 | 808. RY ( 1) C 27        | 0.06  | 2.28   | 0.010 |
| 173. BD ( 1)Sb 47-C1 51 | 811. RY ( 4) C 27        | 0.08  | 2.06   | 0.011 |
| 173. BD ( 1)Sb 47-C1 51 | 813. RY ( 6) C 27        | 0.05  | 2.42   | 0.010 |
| 173. BD ( 1)Sb 47-C1 51 | 815. RY ( 8) C 27        | 0.05  | 3.49   | 0.012 |
| 173. BD ( 1)Sb 47-C1 51 | 834. RY ( 1) H 28        | 0.09  | 2.01   | 0.012 |
| within unit 3           |                          |       |        |       |
| 44. CR ( 2)Sb 47        | 183. LV ( 2)Sb 47        | 1.32  | 4.64   | 0.070 |
| 44. CR ( 2)Sb 47        | 240. BD* ( 1)Sb 47-C1 51 | 1.20  | 4.69   | 0.067 |
| 44. CR ( 2)Sb 47        | 1055. RY ( 1)Sb 47       | 1.13  | 5.47   | 0.070 |
| 44. CR ( 2)Sb 47        | 1057. RY ( 3)Sb 47       | 0.55  | 5.29   | 0.048 |
| 44. CR ( 2)Sb 47        | 1058. RY ( 4)Sb 47       | 0.64  | 5.22   | 0.051 |
| 44. CR ( 2)Sb 47        | 1071. RY (17)Sb 47       | 0.93  | 6.32   | 0.069 |
| 45. CR ( 3)Sb 47        | 183. LV ( 2)Sb 47        | 1.64  | 4.64   | 0.078 |
| 45. CR ( 3)Sb 47        | 240. BD* ( 1)Sb 47-C1 51 | 0.76  | 4.69   | 0.053 |
| 45. CR ( 3)Sb 47        | 1055. RY ( 1)Sb 47       | 0.65  | 5.47   | 0.053 |
| 45. CR ( 3)Sb 47        | 1057. RY ( 3)Sb 47       | 1.41  | 5.29   | 0.077 |
| 45. CR ( 3)Sb 47        | 1072. RY (18)Sb 47       | 0.79  | 6.43   | 0.064 |
| 46. CR ( 4)Sb 47        | 182. LV ( 1)Sb 47        | 2.66  | 4.64   | 0.099 |
| 46. CR ( 4)Sb 47        | 1058. RY ( 4)Sb 47       | 2.32  | 5.22   | 0.098 |
| 47. CR ( 5)Sb 47        | 1055. RY ( 1)Sb 47       | 5.15  | 2.67   | 0.105 |
| 47. CR ( 5)Sb 47        | 1056. RY ( 2)Sb 47       | 4.08  | 2.59   | 0.092 |
| 47. CR ( 5)Sb 47        | 1057. RY ( 3)Sb 47       | 0.51  | 2.50   | 0.032 |
| 47. CR ( 5)Sb 47        | 1061. RY ( 7)Sb 47       | 3.72  | 3.02   | 0.095 |
| 47. CR ( 5)Sb 47        | 1062. RY ( 8)Sb 47       | 2.40  | 2.46   | 0.068 |
| 47. CR ( 5)Sb 47        | 1066. RY (12)Sb 47       | 0.89  | 3.10   | 0.047 |
| 47. CR ( 5)Sb 47        | 1067. RY (13)Sb 47       | 0.96  | 3.09   | 0.048 |
| 47. CR ( 5)Sb 47        | 1070. RY (16)Sb 47       | 1.84  | 6.43   | 0.097 |
| 47. CR ( 5)Sb 47        | 1074. RY (20)Sb 47       | 0.94  | 3.70   | 0.052 |
| 47. CR ( 5)Sb 47        | 1085. RY (31)Sb 47       | 0.59  | 3.47   | 0.040 |
| 48. CR ( 6)Sb 47        | 1055. RY ( 1)Sb 47       | 0.94  | 2.67   | 0.045 |
| 48. CR ( 6)Sb 47        | 1056. RY ( 2)Sb 47       | 3.02  | 2.59   | 0.079 |
| 48. CR ( 6)Sb 47        | 1057. RY ( 3)Sb 47       | 0.65  | 2.50   | 0.036 |
| 48. CR ( 6)Sb 47        | 1059. RY ( 5)Sb 47       | 3.30  | 3.06   | 0.090 |
| 48. CR ( 6)Sb 47        | 1060. RY ( 6)Sb 47       | 0.52  | 2.58   | 0.033 |
| 48. CR ( 6)Sb 47        | 1061. RY ( 7)Sb 47       | 0.55  | 3.02   | 0.036 |
| 48. CR ( 6)Sb 47        | 1062. RY ( 8)Sb 47       | 5.12  | 2.46   | 0.100 |
| 48. CR ( 6)Sb 47        | 1074. RY (20)Sb 47       | 3.12  | 3.70   | 0.096 |
| 48. CR ( 6)Sb 47        | 1075. RY (21)Sb 47       | 1.99  | 4.38   | 0.083 |
| 48. CR ( 6)Sb 47        | 1082. RY (28)Sb 47       | 0.56  | 3.98   | 0.042 |
| 48. CR ( 6)Sb 47        | 1085. RY (31)Sb 47       | 2.89  | 3.47   | 0.089 |
| 49. CR ( 7)Sb 47        | 1055. RY ( 1)Sb 47       | 0.99  | 2.67   | 0.046 |
| 49. CR ( 7)Sb 47        | 1059. RY ( 5)Sb 47       | 3.82  | 3.06   | 0.097 |
| 49. CR ( 7)Sb 47        | 1060. RY ( 6)Sb 47       | 1.46  | 2.58   | 0.055 |
| 49. CR ( 7)Sb 47        | 1062. RY ( 8)Sb 47       | 5.95  | 2.46   | 0.108 |
| 49. CR ( 7)Sb 47        | 1073. RY (19)Sb 47       | 0.60  | 3.90   | 0.043 |
| 49. CR ( 7)Sb 47        | 1074. RY (20)Sb 47       | 3.22  | 3.70   | 0.097 |
| 49. CR ( 7)Sb 47        | 1079. RY (25)Sb 47       | 2.55  | 4.33   | 0.094 |
| 49. CR ( 7)Sb 47        | 1082. RY (28)Sb 47       | 0.50  | 3.98   | 0.040 |
| 49. CR ( 7)Sb 47        | 1085. RY (31)Sb 47       | 3.76  | 3.47   | 0.102 |
| 50. CR ( 8)Sb 47        | 1057. RY ( 3)Sb 47       | 1.00  | 2.49   | 0.045 |
| 50. CR ( 8)Sb 47        | 1059. RY ( 5)Sb 47       | 1.38  | 3.06   | 0.058 |
| 50. CR ( 8)Sb 47        | 1060. RY ( 6)Sb 47       | 6.80  | 2.58   | 0.118 |
| 50. CR ( 8)Sb 47        | 1061. RY ( 7)Sb 47       | 1.58  | 3.02   | 0.062 |
| 50. CR ( 8)Sb 47        | 1069. RY (15)Sb 47       | 0.70  | 2.94   | 0.040 |
| 50. CR ( 8)Sb 47        | 1074. RY (20)Sb 47       | 3.82  | 3.70   | 0.106 |
| 50. CR ( 8)Sb 47        | 1075. RY (21)Sb 47       | 4.46  | 4.38   | 0.125 |
| 50. CR ( 8)Sb 47        | 1082. RY (28)Sb 47       | 1.57  | 3.98   | 0.071 |
| 51. CR ( 9)Sb 47        | 1055. RY ( 1)Sb 47       | 0.92  | 2.67   | 0.044 |
| 51. CR ( 9)Sb 47        | 1056. RY ( 2)Sb 47       | 6.88  | 2.59   | 0.119 |
| 51. CR ( 9)Sb 47        | 1057. RY ( 3)Sb 47       | 4.00  | 2.50   | 0.089 |
| 51. CR ( 9)Sb 47        | 1060. RY ( 6)Sb 47       | 2.16  | 2.58   | 0.067 |
| 51. CR ( 9)Sb 47        | 1061. RY ( 7)Sb 47       | 2.04  | 3.02   | 0.070 |
| 51. CR ( 9)Sb 47        | 1062. RY ( 8)Sb 47       | 0.60  | 2.46   | 0.034 |
| 51. CR ( 9)Sb 47        | 1078. RY (24)Sb 47       | 1.80  | 4.08   | 0.076 |
| 51. CR ( 9)Sb 47        | 1082. RY (28)Sb 47       | 0.55  | 3.98   | 0.042 |
| 51. CR ( 9)Sb 47        | 1084. RY (30)Sb 47       | 1.94  | 6.79   | 0.102 |
| 51. CR ( 9)Sb 47        | 1085. RY (31)Sb 47       | 2.06  | 3.47   | 0.075 |
| 67. CR ( 1)C1 51        | 1203. RY (28)C1 51       | 1.21  | 120.91 | 0.342 |
| 68. CR ( 2)C1 51        | 1185. RY (10)C1 51       | 1.52  | 17.71  | 0.146 |
| 68. CR ( 2)C1 51        | 1198. RY (23)C1 51       | 0.67  | 24.46  | 0.114 |
| 68. CR ( 2)C1 51        | 1203. RY (28)C1 51       | 6.06  | 32.83  | 0.398 |
| 69. CR ( 3)C1 51        | 240. BD* ( 1)Sb 47-C1 51 | 1.92  | 8.56   | 0.114 |
| 69. CR ( 3)C1 51        | 1176. RY ( 1)C1 51       | 0.70  | 9.79   | 0.074 |
| 69. CR ( 3)C1 51        | 1181. RY ( 6)C1 51       | 0.90  | 9.94   | 0.084 |
| 69. CR ( 3)C1 51        | 1184. RY ( 9)C1 51       | 0.56  | 9.56   | 0.065 |
| 69. CR ( 3)C1 51        | 1185. RY (10)C1 51       | 1.48  | 11.69  | 0.117 |
| 69. CR ( 3)C1 51        | 1193. RY (18)C1 51       | 1.72  | 11.31  | 0.124 |
| 69. CR ( 3)C1 51        | 1194. RY (19)C1 51       | 1.44  | 10.22  | 0.108 |
| 69. CR ( 3)C1 51        | 1196. RY (21)C1 51       | 1.33  | 17.02  | 0.134 |
| 69. CR ( 3)C1 51        | 1197. RY (22)C1 51       | 10.23 | 16.32  | 0.365 |
| 69. CR ( 3)C1 51        | 1198. RY (23)C1 51       | 8.34  | 18.44  | 0.350 |
| 69. CR ( 3)C1 51        | 1199. RY (24)C1 51       | 0.88  | 11.22  | 0.089 |
| 70. CR ( 4)C1 51        | 240. BD* ( 1)Sb 47-C1 51 | 1.18  | 8.55   | 0.090 |
| 70. CR ( 4)C1 51        | 1178. RY ( 3)C1 51       | 0.73  | 9.12   | 0.073 |
| 70. CR ( 4)C1 51        | 1181. RY ( 6)C1 51       | 0.82  | 9.94   | 0.080 |
| 70. CR ( 4)C1 51        | 1185. RY (10)C1 51       | 1.61  | 11.69  | 0.122 |
| 70. CR ( 4)C1 51        | 1193. RY (18)C1 51       | 1.16  | 11.31  | 0.102 |
| 70. CR ( 4)C1 51        | 1194. RY (19)C1 51       | 0.77  | 10.22  | 0.079 |
| 70. CR ( 4)C1 51        | 1196. RY (21)C1 51       | 12.05 | 17.02  | 0.404 |
| 70. CR ( 4)C1 51        | 1197. RY (22)C1 51       | 10.32 | 16.31  | 0.366 |
| 70. CR ( 4)C1 51        | 1198. RY (23)C1 51       | 0.69  | 18.44  | 0.101 |
| 71. CR ( 5)C1 51        | 1179. RY ( 4)C1 51       | 0.76  | 9.14   | 0.075 |
| 71. CR ( 5)C1 51        | 1182. RY ( 7)C1 51       | 1.30  | 9.56   | 0.099 |
| 71. CR ( 5)C1 51        | 1191. RY (16)C1 51       | 0.82  | 10.23  | 0.082 |
| 71. CR ( 5)C1 51        | 1192. RY (17)C1 51       | 1.63  | 10.25  | 0.115 |
| 71. CR ( 5)C1 51        | 1196. RY (21)C1 51       | 9.72  | 17.02  | 0.363 |
| 71. CR ( 5)C1 51        | 1197. RY (22)C1 51       | 5.43  | 16.31  | 0.266 |
| 71. CR ( 5)C1 51        | 1198. RY (23)C1 51       | 8.50  | 18.44  | 0.353 |
| 96. LP ( 1)Sb 47        | 240. BD* ( 1)Sb 47-C1 51 | 8.03  | 0.48   | 0.056 |
| 96. LP ( 1)Sb 47        | 1055. RY ( 1)Sb 47       | 0.66  | 1.27   | 0.026 |
| 96. LP ( 1)Sb 47        | 1070. RY (16)Sb 47       | 0.74  | 5.02   | 0.055 |

|                         |                         |       |       |       |
|-------------------------|-------------------------|-------|-------|-------|
| 96. LP ( 1)Sb 47        | 1071. RY (17)Sb 47      | 0.75  | 2.12  | 0.035 |
| 96. LP ( 1)Sb 47        | 1072. RY (18)Sb 47      | 1.80  | 2.23  | 0.057 |
| 96. LP ( 1)Sb 47        | 1073. RY (19)Sb 47      | 1.46  | 2.49  | 0.054 |
| 96. LP ( 1)Sb 47        | 1076. RY (22)Sb 47      | 0.68  | 10.16 | 0.074 |
| 109. LP ( 1)Cl 51       | 240. BD*( 1)Sb 47-cl 51 | 0.52  | 0.81  | 0.018 |
| 109. LP ( 1)Cl 51       | 1055. RY ( 1)Sb 47      | 0.53  | 1.59  | 0.026 |
| 109. LP ( 1)Cl 51       | 1176. RY ( 1)Cl 51      | 4.52  | 2.05  | 0.086 |
| 109. LP ( 1)Cl 51       | 1181. RY ( 6)Cl 51      | 5.64  | 2.19  | 0.099 |
| 109. LP ( 1)Cl 51       | 1182. RY ( 7)Cl 51      | 1.54  | 1.81  | 0.047 |
| 109. LP ( 1)Cl 51       | 1185. RY (10)Cl 51      | 0.69  | 3.95  | 0.047 |
| 109. LP ( 1)Cl 51       | 1198. RY (23)Cl 51      | 1.07  | 10.70 | 0.096 |
| 109. LP ( 1)Cl 51       | 1203. RY (28)Cl 51      | 1.45  | 19.07 | 0.149 |
| 110. LP ( 2)Cl 51       | 182. LV ( 1)Sb 47       | 1.04  | 0.32  | 0.016 |
| 110. LP ( 2)Cl 51       | 183. LV ( 2)Sb 47       | 3.29  | 0.32  | 0.029 |
| 110. LP ( 2)Cl 51       | 1071. RY (17)Sb 47      | 0.66  | 2.00  | 0.032 |
| 110. LP ( 2)Cl 51       | 1178. RY ( 3)Cl 51      | 9.27  | 0.92  | 0.083 |
| 110. LP ( 2)Cl 51       | 1182. RY ( 7)Cl 51      | 0.82  | 1.37  | 0.030 |
| 110. LP ( 2)Cl 51       | 1183. RY ( 8)Cl 51      | 0.82  | 0.95  | 0.025 |
| 110. LP ( 2)Cl 51       | 1184. RY ( 9)Cl 51      | 7.45  | 1.36  | 0.090 |
| 110. LP ( 2)Cl 51       | 1192. RY (17)Cl 51      | 0.87  | 2.05  | 0.038 |
| 110. LP ( 2)Cl 51       | 1194. RY (19)Cl 51      | 4.63  | 2.02  | 0.086 |
| 110. LP ( 2)Cl 51       | 1196. RY (21)Cl 51      | 2.06  | 8.83  | 0.120 |
| 110. LP ( 2)Cl 51       | 1197. RY (22)Cl 51      | 2.82  | 8.12  | 0.135 |
| 110. LP ( 2)Cl 51       | 1198. RY (23)Cl 51      | 0.50  | 10.25 | 0.064 |
| 111. LP ( 3)Cl 51       | 182. LV ( 1)Sb 47       | 3.38  | 0.32  | 0.029 |
| 111. LP ( 3)Cl 51       | 183. LV ( 2)Sb 47       | 1.08  | 0.32  | 0.017 |
| 111. LP ( 3)Cl 51       | 1058. RY ( 4)Sb 47      | 0.59  | 0.90  | 0.021 |
| 111. LP ( 3)Cl 51       | 1179. RY ( 4)Cl 51      | 6.86  | 0.95  | 0.072 |
| 111. LP ( 3)Cl 51       | 1181. RY ( 6)Cl 51      | 1.31  | 1.75  | 0.043 |
| 111. LP ( 3)Cl 51       | 1182. RY ( 7)Cl 51      | 7.95  | 1.36  | 0.093 |
| 111. LP ( 3)Cl 51       | 1184. RY ( 9)Cl 51      | 1.83  | 1.36  | 0.045 |
| 111. LP ( 3)Cl 51       | 1191. RY (16)Cl 51      | 2.80  | 2.04  | 0.067 |
| 111. LP ( 3)Cl 51       | 1192. RY (17)Cl 51      | 2.49  | 2.05  | 0.064 |
| 111. LP ( 3)Cl 51       | 1196. RY (21)Cl 51      | 2.00  | 8.83  | 0.119 |
| 111. LP ( 3)Cl 51       | 1197. RY (22)Cl 51      | 2.92  | 8.12  | 0.137 |
| 111. LP ( 3)Cl 51       | 1198. RY (23)Cl 51      | 0.50  | 10.25 | 0.064 |
| 173. BD ( 1)Sb 47-cl 51 | 240. BD*( 1)Sb 47-cl 51 | 13.03 | 0.54  | 0.075 |
| 173. BD ( 1)Sb 47-cl 51 | 1055. RY ( 1)Sb 47      | 0.64  | 1.32  | 0.026 |
| 173. BD ( 1)Sb 47-cl 51 | 1059. RY ( 5)Sb 47      | 0.65  | 1.71  | 0.030 |
| 173. BD ( 1)Sb 47-cl 51 | 1176. RY ( 1)Cl 51      | 1.81  | 1.78  | 0.051 |
| 173. BD ( 1)Sb 47-cl 51 | 1177. RY ( 2)Cl 51      | 1.74  | 2.63  | 0.060 |
| 173. BD ( 1)Sb 47-cl 51 | 1181. RY ( 6)Cl 51      | 1.60  | 1.92  | 0.049 |
| 173. BD ( 1)Sb 47-cl 51 | 1182. RY ( 7)Cl 51      | 0.59  | 1.54  | 0.027 |
| 173. BD ( 1)Sb 47-cl 51 | 1185. RY (10)Cl 51      | 1.95  | 3.68  | 0.076 |
| 173. BD ( 1)Sb 47-cl 51 | 1198. RY (23)Cl 51      | 0.88  | 10.43 | 0.085 |
| from unit 3 to unit 4   |                         |       |       |       |
| 96. LP ( 1)Sb 47        | 1092. RY ( 1)Cl 48      | 0.66  | 1.16  | 0.025 |
| 96. LP ( 1)Sb 47        | 1093. RY ( 2)Cl 48      | 0.16  | 1.58  | 0.014 |
| 96. LP ( 1)Sb 47        | 1095. RY ( 4)Cl 48      | 0.13  | 1.30  | 0.011 |
| 96. LP ( 1)Sb 47        | 1096. RY ( 5)Cl 48      | 0.08  | 1.68  | 0.010 |
| 96. LP ( 1)Sb 47        | 1099. RY ( 8)Cl 48      | 0.24  | 3.16  | 0.025 |
| 96. LP ( 1)Sb 47        | 1100. RY ( 9)Cl 48      | 0.11  | 1.37  | 0.011 |
| 96. LP ( 1)Sb 47        | 1115. RY (24)Cl 48      | 0.06  | 15.40 | 0.028 |
| 111. LP ( 3)Cl 51       | 1092. RY ( 1)Cl 48      | 0.07  | 1.03  | 0.007 |
| 173. BD ( 1)Sb 47-cl 51 | 1093. RY ( 2)Cl 48      | 0.28  | 1.64  | 0.019 |
| 173. BD ( 1)Sb 47-cl 51 | 1096. RY ( 5)Cl 48      | 0.13  | 1.74  | 0.013 |
| from unit 3 to unit 5   |                         |       |       |       |
| 43. CR ( 1)Sb 47        | 1124. RY ( 5)Cl 49      | 0.06  | 8.23  | 0.019 |
| 96. LP ( 1)Sb 47        | 1120. RY ( 1)Cl 49      | 0.63  | 1.14  | 0.024 |
| 96. LP ( 1)Sb 47        | 1121. RY ( 2)Cl 49      | 0.12  | 1.46  | 0.012 |
| 96. LP ( 1)Sb 47        | 1122. RY ( 3)Cl 49      | 0.05  | 1.16  | 0.007 |
| 96. LP ( 1)Sb 47        | 1124. RY ( 5)Cl 49      | 0.17  | 2.19  | 0.017 |
| 96. LP ( 1)Sb 47        | 1125. RY ( 6)Cl 49      | 0.09  | 1.39  | 0.010 |
| 96. LP ( 1)Sb 47        | 1126. RY ( 7)Cl 49      | 0.06  | 1.64  | 0.009 |
| 96. LP ( 1)Sb 47        | 1127. RY ( 8)Cl 49      | 0.31  | 2.85  | 0.027 |
| 96. LP ( 1)Sb 47        | 1128. RY ( 9)Cl 49      | 0.11  | 1.46  | 0.011 |
| 96. LP ( 1)Sb 47        | 1130. RY (11)Cl 49      | 0.07  | 4.08  | 0.015 |
| 96. LP ( 1)Sb 47        | 1138. RY (19)Cl 49      | 0.07  | 2.82  | 0.012 |
| 96. LP ( 1)Sb 47        | 1144. RY (25)Cl 49      | 0.06  | 12.61 | 0.024 |
| 110. LP ( 2)Cl 51       | 1120. RY ( 1)Cl 49      | 0.08  | 1.02  | 0.008 |
| 110. LP ( 2)Cl 51       | 1121. RY ( 2)Cl 49      | 0.05  | 1.34  | 0.007 |
| 173. BD ( 1)Sb 47-cl 51 | 1121. RY ( 2)Cl 49      | 0.39  | 1.52  | 0.022 |
| 173. BD ( 1)Sb 47-cl 51 | 1123. RY ( 4)Cl 49      | 0.06  | 1.22  | 0.008 |
| 173. BD ( 1)Sb 47-cl 51 | 1124. RY ( 5)Cl 49      | 0.21  | 2.25  | 0.020 |
| 173. BD ( 1)Sb 47-cl 51 | 1135. RY (16)Cl 49      | 0.06  | 3.31  | 0.012 |
| from unit 3 to unit 6   |                         |       |       |       |
| 96. LP ( 1)Sb 47        | 1148. RY ( 1)Cl 50      | 0.52  | 1.18  | 0.022 |
| 96. LP ( 1)Sb 47        | 1149. RY ( 2)Cl 50      | 0.08  | 1.47  | 0.010 |
| 96. LP ( 1)Sb 47        | 1152. RY ( 5)Cl 50      | 0.07  | 1.69  | 0.010 |
| 96. LP ( 1)Sb 47        | 1153. RY ( 6)Cl 50      | 0.09  | 1.58  | 0.011 |
| 96. LP ( 1)Sb 47        | 1154. RY ( 7)Cl 50      | 0.14  | 1.67  | 0.014 |
| 96. LP ( 1)Sb 47        | 1155. RY ( 8)Cl 50      | 0.21  | 2.59  | 0.021 |
| 96. LP ( 1)Sb 47        | 1156. RY ( 9)Cl 50      | 0.18  | 1.74  | 0.016 |
| 96. LP ( 1)Sb 47        | 1157. RY (10)Cl 50      | 0.06  | 4.16  | 0.014 |
| 96. LP ( 1)Sb 47        | 1173. RY (26)Cl 50      | 0.05  | 7.33  | 0.018 |
| 111. LP ( 3)Cl 51       | 1148. RY ( 1)Cl 50      | 0.08  | 1.05  | 0.008 |
| 173. BD ( 1)Sb 47-cl 51 | 1149. RY ( 2)Cl 50      | 0.25  | 1.53  | 0.017 |
| 173. BD ( 1)Sb 47-cl 51 | 1151. RY ( 4)Cl 50      | 0.15  | 1.23  | 0.012 |
| 173. BD ( 1)Sb 47-cl 51 | 1152. RY ( 5)Cl 50      | 0.07  | 1.74  | 0.010 |
| from unit 3 to unit 7   |                         |       |       |       |
| 96. LP ( 1)Sb 47        | 1204. RY ( 1)Cl 52      | 0.70  | 1.20  | 0.026 |
| 96. LP ( 1)Sb 47        | 1205. RY ( 2)Cl 52      | 0.23  | 1.88  | 0.019 |
| 96. LP ( 1)Sb 47        | 1208. RY ( 5)Cl 52      | 0.26  | 2.63  | 0.023 |
| 96. LP ( 1)Sb 47        | 1211. RY ( 8)Cl 52      | 0.12  | 1.75  | 0.013 |
| 96. LP ( 1)Sb 47        | 1212. RY ( 9)Cl 52      | 0.11  | 1.69  | 0.012 |
| 96. LP ( 1)Sb 47        | 1214. RY (11)Cl 52      | 0.07  | 4.36  | 0.016 |
| 96. LP ( 1)Sb 47        | 1227. RY (24)Cl 52      | 0.06  | 14.05 | 0.026 |
| 110. LP ( 2)Cl 51       | 1204. RY ( 1)Cl 52      | 0.07  | 1.08  | 0.008 |
| 110. LP ( 2)Cl 51       | 1210. RY ( 7)Cl 52      | 0.08  | 2.20  | 0.012 |

|                         |                          |       |       |       |
|-------------------------|--------------------------|-------|-------|-------|
| 173. BD ( 1)Sb 47-C1 51 | 1205. RY ( 2)C1 52       | 0.22  | 1.94  | 0.018 |
| 173. BD ( 1)Sb 47-C1 51 | 1208. RY ( 5)C1 52       | 0.11  | 2.68  | 0.015 |
| from unit 3 to unit 8   |                          |       |       |       |
| None above threshold    |                          |       |       |       |
| from unit 4 to unit 1   |                          |       |       |       |
| 99. LP ( 3)C1 48        | 251. RY ( 4)Pt 1         | 0.05  | 2.18  | 0.010 |
| 99. LP ( 3)C1 48        | 256. RY ( 9)Pt 1         | 0.08  | 2.65  | 0.013 |
| from unit 4 to unit 2   |                          |       |       |       |
| 98. LP ( 2)C1 48        | 588. RY ( 4) C 16        | 0.08  | 1.62  | 0.010 |
| 98. LP ( 2)C1 48        | 611. RY ( 1) C 17        | 0.11  | 2.45  | 0.015 |
| 98. LP ( 2)C1 48        | 613. RY ( 3) C 17        | 0.10  | 1.39  | 0.010 |
| 98. LP ( 2)C1 48        | 620. RY (10) C 17        | 0.06  | 2.98  | 0.012 |
| 98. LP ( 2)C1 48        | 622. RY (12) C 17        | 0.06  | 3.41  | 0.012 |
| 99. LP ( 3)C1 48        | 196. BD* ( 2) N 7- C 10  | 0.50  | 0.14  | 0.007 |
| 99. LP ( 3)C1 48        | 492. RY ( 1) C 10        | 0.06  | 1.86  | 0.009 |
| 99. LP ( 3)C1 48        | 493. RY ( 2) C 10        | 0.32  | 1.32  | 0.018 |
| 99. LP ( 3)C1 48        | 496. RY ( 5) C 10        | 0.05  | 2.32  | 0.010 |
| 99. LP ( 3)C1 48        | 498. RY ( 7) C 10        | 0.30  | 1.71  | 0.020 |
| 99. LP ( 3)C1 48        | 501. RY (10) C 10        | 0.06  | 2.33  | 0.010 |
| 99. LP ( 3)C1 48        | 504. RY (13) C 10        | 0.25  | 2.84  | 0.024 |
| 99. LP ( 3)C1 48        | 525. RY ( 3) C 12        | 0.06  | 1.07  | 0.007 |
| from unit 4 to unit 3   |                          |       |       |       |
| 53. CR ( 2)C1 48        | 182. LV ( 1)Sb 47        | 0.25  | 14.85 | 0.054 |
| 53. CR ( 2)C1 48        | 1058. RY ( 4)Sb 47       | 0.31  | 15.43 | 0.062 |
| 53. CR ( 2)C1 48        | 1063. RY ( 9)Sb 47       | 0.06  | 16.03 | 0.027 |
| 54. CR ( 3)C1 48        | 1057. RY ( 3)Sb 47       | 0.09  | 9.14  | 0.026 |
| 54. CR ( 3)C1 48        | 1060. RY ( 6)Sb 47       | 0.05  | 9.22  | 0.019 |
| 55. CR ( 4)C1 48        | 1057. RY ( 3)Sb 47       | 0.06  | 9.14  | 0.020 |
| 55. CR ( 4)C1 48        | 1062. RY ( 8)Sb 47       | 0.05  | 9.10  | 0.020 |
| 56. CR ( 5)C1 48        | 182. LV ( 1)Sb 47        | 0.12  | 8.49  | 0.029 |
| 56. CR ( 5)C1 48        | 1055. RY ( 1)Sb 47       | 0.07  | 9.32  | 0.023 |
| 56. CR ( 5)C1 48        | 1056. RY ( 2)Sb 47       | 0.24  | 9.23  | 0.042 |
| 56. CR ( 5)C1 48        | 1057. RY ( 3)Sb 47       | 0.07  | 9.14  | 0.022 |
| 56. CR ( 5)C1 48        | 1063. RY ( 9)Sb 47       | 0.30  | 9.66  | 0.048 |
| 56. CR ( 5)C1 48        | 1068. RY (14)Sb 47       | 0.13  | 9.63  | 0.031 |
| 56. CR ( 5)C1 48        | 1070. RY (16)Sb 47       | 0.12  | 13.07 | 0.035 |
| 56. CR ( 5)C1 48        | 1074. RY (20)Sb 47       | 0.11  | 10.34 | 0.030 |
| 56. CR ( 5)C1 48        | 1084. RY (30)Sb 47       | 0.17  | 13.44 | 0.042 |
| 97. LP ( 1)C1 48        | 182. LV ( 1)Sb 47        | 6.97  | 0.73  | 0.064 |
| 97. LP ( 1)C1 48        | 183. LV ( 2)Sb 47        | 1.24  | 0.73  | 0.027 |
| 97. LP ( 1)C1 48        | 240. BD* ( 1)Sb 47-C1 51 | 0.06  | 0.78  | 0.006 |
| 97. LP ( 1)C1 48        | 1056. RY ( 2)Sb 47       | 0.09  | 1.47  | 0.010 |
| 97. LP ( 1)C1 48        | 1058. RY ( 4)Sb 47       | 0.20  | 1.31  | 0.015 |
| 97. LP ( 1)C1 48        | 1067. RY (13)Sb 47       | 0.10  | 1.97  | 0.012 |
| 97. LP ( 1)C1 48        | 1068. RY (14)Sb 47       | 0.15  | 1.88  | 0.015 |
| 97. LP ( 1)C1 48        | 1072. RY (18)Sb 47       | 0.32  | 2.52  | 0.026 |
| 97. LP ( 1)C1 48        | 1073. RY (19)Sb 47       | 0.51  | 2.79  | 0.034 |
| 97. LP ( 1)C1 48        | 1076. RY (22)Sb 47       | 0.07  | 10.45 | 0.024 |
| 97. LP ( 1)C1 48        | 1077. RY (23)Sb 47       | 0.15  | 2.37  | 0.017 |
| 97. LP ( 1)C1 48        | 1090. RY (36)Sb 47       | 0.08  | 37.07 | 0.047 |
| 98. LP ( 2)C1 48        | 182. LV ( 1)Sb 47        | 1.32  | 0.30  | 0.018 |
| 98. LP ( 2)C1 48        | 183. LV ( 2)Sb 47        | 0.79  | 0.30  | 0.014 |
| 98. LP ( 2)C1 48        | 240. BD* ( 1)Sb 47-C1 51 | 0.12  | 0.35  | 0.006 |
| 98. LP ( 2)C1 48        | 1057. RY ( 3)Sb 47       | 0.18  | 0.96  | 0.012 |
| 98. LP ( 2)C1 48        | 1058. RY ( 4)Sb 47       | 0.16  | 0.89  | 0.011 |
| 98. LP ( 2)C1 48        | 1064. RY (10)Sb 47       | 0.09  | 2.25  | 0.013 |
| 98. LP ( 2)C1 48        | 1069. RY (15)Sb 47       | 0.13  | 1.40  | 0.012 |
| 98. LP ( 2)C1 48        | 1071. RY (17)Sb 47       | 0.30  | 1.98  | 0.022 |
| 98. LP ( 2)C1 48        | 1082. RY (28)Sb 47       | 0.06  | 2.44  | 0.010 |
| 98. LP ( 2)C1 48        | 1085. RY (31)Sb 47       | 0.20  | 1.93  | 0.017 |
| 98. LP ( 2)C1 48        | 1091. RY (37)Sb 47       | 0.08  | 36.77 | 0.048 |
| 99. LP ( 3)C1 48        | 183. LV ( 2)Sb 47        | 0.37  | 0.30  | 0.009 |
| 99. LP ( 3)C1 48        | 240. BD* ( 1)Sb 47-C1 51 | 1.02  | 0.35  | 0.017 |
| 99. LP ( 3)C1 48        | 1057. RY ( 3)Sb 47       | 0.05  | 0.95  | 0.006 |
| 99. LP ( 3)C1 48        | 1058. RY ( 4)Sb 47       | 0.31  | 0.88  | 0.015 |
| 99. LP ( 3)C1 48        | 1059. RY ( 5)Sb 47       | 0.11  | 1.52  | 0.012 |
| 99. LP ( 3)C1 48        | 1067. RY (13)Sb 47       | 0.21  | 1.54  | 0.016 |
| 99. LP ( 3)C1 48        | 1072. RY (18)Sb 47       | 0.08  | 2.09  | 0.012 |
| 99. LP ( 3)C1 48        | 1073. RY (19)Sb 47       | 0.10  | 2.36  | 0.013 |
| 99. LP ( 3)C1 48        | 1074. RY (20)Sb 47       | 0.18  | 2.16  | 0.018 |
| 99. LP ( 3)C1 48        | 1075. RY (21)Sb 47       | 0.11  | 2.84  | 0.015 |
| 99. LP ( 3)C1 48        | 1086. RY (32)Sb 47       | 0.05  | 33.27 | 0.037 |
| 99. LP ( 3)C1 48        | 1179. RY ( 4)C1 51       | 0.06  | 0.94  | 0.007 |
| 99. LP ( 3)C1 48        | 1181. RY ( 6)C1 51       | 0.12  | 1.73  | 0.013 |
| 100. LP ( 4)C1 48       | 182. LV ( 1)Sb 47        | 41.14 | 0.40  | 0.115 |
| 100. LP ( 4)C1 48       | 183. LV ( 2)Sb 47        | 7.03  | 0.40  | 0.048 |
| 100. LP ( 4)C1 48       | 240. BD* ( 1)Sb 47-C1 51 | 1.53  | 0.45  | 0.023 |
| 100. LP ( 4)C1 48       | 1055. RY ( 1)Sb 47       | 0.06  | 1.23  | 0.008 |
| 100. LP ( 4)C1 48       | 1057. RY ( 3)Sb 47       | 0.14  | 1.06  | 0.011 |
| 100. LP ( 4)C1 48       | 1059. RY ( 5)Sb 47       | 1.03  | 1.62  | 0.037 |
| 100. LP ( 4)C1 48       | 1060. RY ( 6)Sb 47       | 0.31  | 1.14  | 0.017 |
| 100. LP ( 4)C1 48       | 1061. RY ( 7)Sb 47       | 0.92  | 1.58  | 0.034 |
| 100. LP ( 4)C1 48       | 1062. RY ( 8)Sb 47       | 0.24  | 1.02  | 0.014 |
| 100. LP ( 4)C1 48       | 1064. RY (10)Sb 47       | 0.95  | 2.35  | 0.042 |
| 100. LP ( 4)C1 48       | 1065. RY (11)Sb 47       | 0.76  | 2.60  | 0.040 |
| 100. LP ( 4)C1 48       | 1066. RY (12)Sb 47       | 0.45  | 1.67  | 0.024 |
| 100. LP ( 4)C1 48       | 1067. RY (13)Sb 47       | 0.52  | 1.65  | 0.026 |
| 100. LP ( 4)C1 48       | 1070. RY (16)Sb 47       | 1.15  | 4.99  | 0.067 |
| 100. LP ( 4)C1 48       | 1071. RY (17)Sb 47       | 0.06  | 2.08  | 0.010 |
| 100. LP ( 4)C1 48       | 1072. RY (18)Sb 47       | 0.13  | 2.19  | 0.015 |
| 100. LP ( 4)C1 48       | 1074. RY (20)Sb 47       | 0.68  | 2.26  | 0.035 |
| 100. LP ( 4)C1 48       | 1075. RY (21)Sb 47       | 0.22  | 2.94  | 0.022 |
| 100. LP ( 4)C1 48       | 1076. RY (22)Sb 47       | 0.30  | 10.13 | 0.049 |
| 100. LP ( 4)C1 48       | 1078. RY (24)Sb 47       | 0.28  | 2.64  | 0.024 |
| 100. LP ( 4)C1 48       | 1079. RY (25)Sb 47       | 0.25  | 2.89  | 0.024 |
| 100. LP ( 4)C1 48       | 1080. RY (26)Sb 47       | 0.39  | 4.33  | 0.037 |
| 100. LP ( 4)C1 48       | 1081. RY (27)Sb 47       | 0.35  | 8.03  | 0.047 |
| 100. LP ( 4)C1 48       | 1083. RY (29)Sb 47       | 0.91  | 33.84 | 0.157 |
| 100. LP ( 4)C1 48       | 1084. RY (30)Sb 47       | 1.99  | 5.36  | 0.092 |



|                       |                         |       |        |       |
|-----------------------|-------------------------|-------|--------|-------|
| 100. LP ( 4)C1 48     | 1087. RY (33)Sb 47      | 0.44  | 8.16   | 0.053 |
| 100. LP ( 4)C1 48     | 1088. RY (34)Sb 47      | 0.15  | 5.84   | 0.026 |
| 100. LP ( 4)C1 48     | 1089. RY (35)Sb 47      | 0.25  | 93.67  | 0.135 |
| 100. LP ( 4)C1 48     | 1090. RY (36)Sb 47      | 0.93  | 36.75  | 0.165 |
| 100. LP ( 4)C1 48     | 1091. RY (37)Sb 47      | 0.27  | 36.87  | 0.088 |
| 100. LP ( 4)C1 48     | 1177. RY ( 2)C1 51      | 0.06  | 2.54   | 0.011 |
| within unit 4         |                         |       |        |       |
| 52. CR ( 1)C1 48      | 1115. RY (24)C1 48      | 1.09  | 117.20 | 0.318 |
| 53. CR ( 2)C1 48      | 1101. RY (10)C1 48      | 0.98  | 17.59  | 0.117 |
| 53. CR ( 2)C1 48      | 1102. RY (11)C1 48      | 1.66  | 18.64  | 0.157 |
| 53. CR ( 2)C1 48      | 1115. RY (24)C1 48      | 5.55  | 29.82  | 0.363 |
| 53. CR ( 2)C1 48      | 1117. RY (26)C1 48      | 0.70  | 18.25  | 0.101 |
| 54. CR ( 3)C1 48      | 1096. RY ( 5)C1 48      | 1.07  | 9.73   | 0.091 |
| 54. CR ( 3)C1 48      | 1105. RY (14)C1 48      | 0.71  | 11.34  | 0.080 |
| 54. CR ( 3)C1 48      | 1106. RY (15)C1 48      | 0.70  | 10.56  | 0.077 |
| 54. CR ( 3)C1 48      | 1107. RY (16)C1 48      | 0.62  | 11.22  | 0.074 |
| 54. CR ( 3)C1 48      | 1108. RY (17)C1 48      | 0.84  | 11.44  | 0.087 |
| 54. CR ( 3)C1 48      | 1109. RY (18)C1 48      | 0.82  | 11.52  | 0.087 |
| 54. CR ( 3)C1 48      | 1110. RY (19)C1 48      | 8.59  | 17.42  | 0.345 |
| 54. CR ( 3)C1 48      | 1111. RY (20)C1 48      | 6.67  | 17.25  | 0.303 |
| 54. CR ( 3)C1 48      | 1112. RY (21)C1 48      | 5.79  | 17.59  | 0.285 |
| 54. CR ( 3)C1 48      | 1113. RY (22)C1 48      | 1.11  | 10.92  | 0.098 |
| 54. CR ( 3)C1 48      | 1114. RY (23)C1 48      | 1.74  | 11.39  | 0.126 |
| 55. CR ( 4)C1 48      | 1097. RY ( 6)C1 48      | 0.95  | 9.43   | 0.085 |
| 55. CR ( 4)C1 48      | 1105. RY (14)C1 48      | 1.80  | 11.34  | 0.127 |
| 55. CR ( 4)C1 48      | 1106. RY (15)C1 48      | 0.61  | 10.56  | 0.072 |
| 55. CR ( 4)C1 48      | 1109. RY (18)C1 48      | 0.88  | 11.52  | 0.090 |
| 55. CR ( 4)C1 48      | 1110. RY (19)C1 48      | 5.91  | 17.42  | 0.286 |
| 55. CR ( 4)C1 48      | 1111. RY (20)C1 48      | 15.58 | 17.25  | 0.463 |
| 55. CR ( 4)C1 48      | 1112. RY (21)C1 48      | 1.47  | 17.59  | 0.143 |
| 55. CR ( 4)C1 48      | 1116. RY (25)C1 48      | 0.59  | 10.94  | 0.072 |
| 56. CR ( 5)C1 48      | 1092. RY ( 1)C1 48      | 0.81  | 9.20   | 0.077 |
| 56. CR ( 5)C1 48      | 1098. RY ( 7)C1 48      | 1.50  | 10.02  | 0.109 |
| 56. CR ( 5)C1 48      | 1099. RY ( 8)C1 48      | 0.66  | 11.21  | 0.077 |
| 56. CR ( 5)C1 48      | 1101. RY (10)C1 48      | 2.27  | 11.22  | 0.142 |
| 56. CR ( 5)C1 48      | 1102. RY (11)C1 48      | 0.86  | 12.28  | 0.092 |
| 56. CR ( 5)C1 48      | 1110. RY (19)C1 48      | 8.13  | 17.42  | 0.336 |
| 56. CR ( 5)C1 48      | 1112. RY (21)C1 48      | 11.93 | 17.60  | 0.409 |
| 56. CR ( 5)C1 48      | 1114. RY (23)C1 48      | 0.62  | 11.40  | 0.075 |
| 97. LP ( 1)C1 48      | 1096. RY ( 5)C1 48      | 0.59  | 1.97   | 0.031 |
| 97. LP ( 1)C1 48      | 1098. RY ( 7)C1 48      | 6.47  | 2.27   | 0.108 |
| 97. LP ( 1)C1 48      | 1099. RY ( 8)C1 48      | 1.11  | 3.45   | 0.055 |
| 97. LP ( 1)C1 48      | 1101. RY (10)C1 48      | 1.12  | 3.47   | 0.056 |
| 97. LP ( 1)C1 48      | 1102. RY (11)C1 48      | 0.79  | 4.52   | 0.053 |
| 97. LP ( 1)C1 48      | 1107. RY (16)C1 48      | 0.89  | 3.47   | 0.050 |
| 97. LP ( 1)C1 48      | 1112. RY (21)C1 48      | 0.80  | 9.84   | 0.079 |
| 97. LP ( 1)C1 48      | 1115. RY (24)C1 48      | 1.98  | 15.70  | 0.157 |
| 98. LP ( 2)C1 48      | 1094. RY ( 3)C1 48      | 1.76  | 0.94   | 0.036 |
| 98. LP ( 2)C1 48      | 1095. RY ( 4)C1 48      | 2.47  | 1.16   | 0.048 |
| 98. LP ( 2)C1 48      | 1096. RY ( 5)C1 48      | 1.67  | 1.55   | 0.045 |
| 98. LP ( 2)C1 48      | 1097. RY ( 6)C1 48      | 10.34 | 1.25   | 0.102 |
| 98. LP ( 2)C1 48      | 1100. RY ( 9)C1 48      | 1.25  | 1.23   | 0.035 |
| 98. LP ( 2)C1 48      | 1105. RY (14)C1 48      | 2.66  | 3.16   | 0.082 |
| 98. LP ( 2)C1 48      | 1106. RY (15)C1 48      | 1.31  | 2.38   | 0.050 |
| 98. LP ( 2)C1 48      | 1110. RY (19)C1 48      | 0.66  | 9.24   | 0.070 |
| 98. LP ( 2)C1 48      | 1111. RY (20)C1 48      | 3.55  | 9.07   | 0.160 |
| 98. LP ( 2)C1 48      | 1113. RY (22)C1 48      | 0.84  | 2.73   | 0.043 |
| 99. LP ( 3)C1 48      | 1093. RY ( 2)C1 48      | 1.66  | 1.44   | 0.044 |
| 99. LP ( 3)C1 48      | 1094. RY ( 3)C1 48      | 0.54  | 0.94   | 0.020 |
| 99. LP ( 3)C1 48      | 1095. RY ( 4)C1 48      | 1.62  | 1.16   | 0.039 |
| 99. LP ( 3)C1 48      | 1096. RY ( 5)C1 48      | 7.15  | 1.55   | 0.094 |
| 99. LP ( 3)C1 48      | 1097. RY ( 6)C1 48      | 2.55  | 1.25   | 0.050 |
| 99. LP ( 3)C1 48      | 1098. RY ( 7)C1 48      | 1.22  | 1.84   | 0.042 |
| 99. LP ( 3)C1 48      | 1100. RY ( 9)C1 48      | 0.69  | 1.23   | 0.026 |
| 99. LP ( 3)C1 48      | 1108. RY (17)C1 48      | 0.54  | 3.25   | 0.037 |
| 99. LP ( 3)C1 48      | 1109. RY (18)C1 48      | 1.17  | 3.34   | 0.056 |
| 99. LP ( 3)C1 48      | 1110. RY (19)C1 48      | 3.48  | 9.23   | 0.160 |
| 99. LP ( 3)C1 48      | 1111. RY (20)C1 48      | 0.85  | 9.07   | 0.079 |
| 99. LP ( 3)C1 48      | 1117. RY (26)C1 48      | 0.61  | 3.70   | 0.042 |
| 100. LP ( 4)C1 48     | 1092. RY ( 1)C1 48      | 5.05  | 1.12   | 0.067 |
| 100. LP ( 4)C1 48     | 1093. RY ( 2)C1 48      | 1.46  | 1.55   | 0.042 |
| 100. LP ( 4)C1 48     | 1096. RY ( 5)C1 48      | 1.24  | 1.65   | 0.040 |
| 100. LP ( 4)C1 48     | 1098. RY ( 7)C1 48      | 0.94  | 1.94   | 0.038 |
| 100. LP ( 4)C1 48     | 1101. RY (10)C1 48      | 2.94  | 3.14   | 0.086 |
| 100. LP ( 4)C1 48     | 1102. RY (11)C1 48      | 1.46  | 4.20   | 0.070 |
| 100. LP ( 4)C1 48     | 1112. RY (21)C1 48      | 3.00  | 9.52   | 0.151 |
| 100. LP ( 4)C1 48     | 1114. RY (23)C1 48      | 0.57  | 3.32   | 0.039 |
| from unit 4 to unit 5 |                         |       |        |       |
| 98. LP ( 2)C1 48      | 1127. RY ( 8)C1 49      | 0.07  | 2.71   | 0.012 |
| from unit 4 to unit 6 |                         |       |        |       |
| 100. LP ( 4)C1 48     | 1152. RY ( 5)C1 50      | 0.15  | 1.65   | 0.014 |
| 100. LP ( 4)C1 48     | 1157. RY (10)C1 50      | 0.21  | 4.12   | 0.026 |
| from unit 4 to unit 7 |                         |       |        |       |
| None above threshold  |                         |       |        |       |
| from unit 4 to unit 8 |                         |       |        |       |
| None above threshold  |                         |       |        |       |
| from unit 5 to unit 1 |                         |       |        |       |
| 60. CR ( 4)C1 49      | 284. RY ( 7) S 2        | 0.05  | 10.04  | 0.020 |
| 102. LP ( 2)C1 49     | 228. BD*( 1) C 32- H 33 | 0.22  | 0.77   | 0.012 |
| 102. LP ( 2)C1 49     | 875. RY ( 1) C 32       | 0.05  | 1.48   | 0.008 |
| 102. LP ( 2)C1 49     | 901. RY ( 1) H 33       | 0.43  | 1.67   | 0.024 |
| 102. LP ( 2)C1 49     | 902. RY ( 2) H 33       | 0.15  | 2.27   | 0.016 |
| 103. LP ( 3)C1 49     | 187. BD*( 1) S 2- C 44  | 0.57  | 0.32   | 0.012 |
| 103. LP ( 3)C1 49     | 225. BD*( 1) C 29- H 30 | 0.08  | 0.74   | 0.007 |
| 103. LP ( 3)C1 49     | 228. BD*( 1) C 32- H 33 | 0.15  | 0.80   | 0.010 |
| 103. LP ( 3)C1 49     | 251. RY ( 4)Pt 1        | 0.07  | 2.22   | 0.011 |
| 103. LP ( 3)C1 49     | 254. RY ( 7)Pt 1        | 0.12  | 2.00   | 0.014 |

|                   |                   |      |      |       |
|-------------------|-------------------|------|------|-------|
| 103. LP ( 3)C1 49 | 255. RY ( 8)Pt 1  | 0.06 | 2.61 | 0.012 |
| 103. LP ( 3)C1 49 | 260. RY (13)Pt 1  | 0.06 | 7.37 | 0.018 |
| 103. LP ( 3)C1 49 | 282. RY ( 5) S 2  | 0.06 | 5.11 | 0.015 |
| 103. LP ( 3)C1 49 | 284. RY ( 7) S 2  | 0.41 | 1.89 | 0.025 |
| 103. LP ( 3)C1 49 | 285. RY ( 8) S 2  | 0.06 | 1.99 | 0.010 |
| 103. LP ( 3)C1 49 | 293. RY (16) S 2  | 0.08 | 3.07 | 0.014 |
| 103. LP ( 3)C1 49 | 839. RY ( 1) C 29 | 0.06 | 1.56 | 0.009 |
| 103. LP ( 3)C1 49 | 842. RY ( 4) C 29 | 0.11 | 1.88 | 0.013 |
| 103. LP ( 3)C1 49 | 901. RY ( 1) H 33 | 0.28 | 1.70 | 0.020 |
| 103. LP ( 3)C1 49 | 902. RY ( 2) H 33 | 0.14 | 2.30 | 0.016 |
| 104. LP ( 4)C1 49 | 248. RY ( 1)Pt 1  | 0.05 | 2.24 | 0.010 |

from unit 5 to unit 2  
None above threshold

from unit 5 to unit 3

|                   |                          |       |       |       |
|-------------------|--------------------------|-------|-------|-------|
| 58. CR ( 2)C1 49  | 183. LV ( 2)Sb 47        | 0.22  | 14.90 | 0.051 |
| 58. CR ( 2)C1 49  | 1057. RY ( 3)Sb 47       | 0.32  | 15.55 | 0.063 |
| 58. CR ( 2)C1 49  | 1065. RY (11)Sb 47       | 0.05  | 17.10 | 0.027 |
| 58. CR ( 2)C1 49  | 1070. RY (16)Sb 47       | 0.06  | 19.48 | 0.029 |
| 58. CR ( 2)C1 49  | 1084. RY (30)Sb 47       | 0.05  | 19.85 | 0.028 |
| 59. CR ( 3)C1 49  | 183. LV ( 2)Sb 47        | 0.06  | 8.50  | 0.020 |
| 59. CR ( 3)C1 49  | 1056. RY ( 2)Sb 47       | 0.11  | 9.24  | 0.028 |
| 59. CR ( 3)C1 49  | 1065. RY (11)Sb 47       | 0.11  | 10.70 | 0.031 |
| 59. CR ( 3)C1 49  | 1066. RY (12)Sb 47       | 0.06  | 9.76  | 0.022 |
| 59. CR ( 3)C1 49  | 1070. RY (16)Sb 47       | 0.05  | 13.08 | 0.023 |
| 59. CR ( 3)C1 49  | 1071. RY (17)Sb 47       | 0.06  | 10.18 | 0.022 |
| 59. CR ( 3)C1 49  | 1084. RY (30)Sb 47       | 0.08  | 13.45 | 0.029 |
| 60. CR ( 4)C1 49  | 183. LV ( 2)Sb 47        | 0.08  | 8.50  | 0.024 |
| 60. CR ( 4)C1 49  | 1055. RY ( 1)Sb 47       | 0.12  | 9.33  | 0.030 |
| 60. CR ( 4)C1 49  | 1056. RY ( 2)Sb 47       | 0.16  | 9.24  | 0.035 |
| 60. CR ( 4)C1 49  | 1057. RY ( 3)Sb 47       | 0.07  | 9.15  | 0.023 |
| 60. CR ( 4)C1 49  | 1065. RY (11)Sb 47       | 0.17  | 10.70 | 0.039 |
| 60. CR ( 4)C1 49  | 1066. RY (12)Sb 47       | 0.06  | 9.76  | 0.021 |
| 60. CR ( 4)C1 49  | 1067. RY (13)Sb 47       | 0.07  | 9.74  | 0.024 |
| 60. CR ( 4)C1 49  | 1069. RY (15)Sb 47       | 0.05  | 9.60  | 0.020 |
| 60. CR ( 4)C1 49  | 1070. RY (16)Sb 47       | 0.06  | 13.09 | 0.026 |
| 60. CR ( 4)C1 49  | 1078. RY (24)Sb 47       | 0.06  | 10.74 | 0.023 |
| 60. CR ( 4)C1 49  | 1084. RY (30)Sb 47       | 0.17  | 13.45 | 0.042 |
| 61. CR ( 5)C1 49  | 1058. RY ( 4)Sb 47       | 0.09  | 9.08  | 0.026 |
| 61. CR ( 5)C1 49  | 1062. RY ( 8)Sb 47       | 0.08  | 9.11  | 0.024 |
| 101. LP ( 1)C1 49 | 182. LV ( 1)Sb 47        | 1.28  | 0.73  | 0.027 |
| 101. LP ( 1)C1 49 | 183. LV ( 2)Sb 47        | 7.17  | 0.73  | 0.064 |
| 101. LP ( 1)C1 49 | 240. BD* ( 1)Sb 47-cl 51 | 0.19  | 0.77  | 0.011 |
| 101. LP ( 1)C1 49 | 1056. RY ( 2)Sb 47       | 0.21  | 1.47  | 0.016 |
| 101. LP ( 1)C1 49 | 1057. RY ( 3)Sb 47       | 0.09  | 1.38  | 0.010 |
| 101. LP ( 1)C1 49 | 1065. RY (11)Sb 47       | 0.07  | 2.92  | 0.013 |
| 101. LP ( 1)C1 49 | 1069. RY (15)Sb 47       | 0.23  | 1.82  | 0.018 |
| 101. LP ( 1)C1 49 | 1071. RY (17)Sb 47       | 0.51  | 2.41  | 0.031 |
| 101. LP ( 1)C1 49 | 1072. RY (18)Sb 47       | 0.36  | 2.52  | 0.027 |
| 101. LP ( 1)C1 49 | 1074. RY (20)Sb 47       | 0.06  | 2.58  | 0.011 |
| 101. LP ( 1)C1 49 | 1076. RY (22)Sb 47       | 0.07  | 10.45 | 0.024 |
| 101. LP ( 1)C1 49 | 1080. RY (26)Sb 47       | 0.05  | 4.65  | 0.014 |
| 101. LP ( 1)C1 49 | 1081. RY (27)Sb 47       | 0.06  | 8.35  | 0.020 |
| 101. LP ( 1)C1 49 | 1083. RY (29)Sb 47       | 0.07  | 34.17 | 0.043 |
| 101. LP ( 1)C1 49 | 1084. RY (30)Sb 47       | 0.06  | 5.68  | 0.016 |
| 101. LP ( 1)C1 49 | 1091. RY (37)Sb 47       | 0.06  | 37.20 | 0.041 |
| 102. LP ( 2)C1 49 | 182. LV ( 1)Sb 47        | 2.02  | 0.31  | 0.022 |
| 102. LP ( 2)C1 49 | 183. LV ( 2)Sb 47        | 0.16  | 0.31  | 0.006 |
| 102. LP ( 2)C1 49 | 1058. RY ( 4)Sb 47       | 0.32  | 0.90  | 0.015 |
| 102. LP ( 2)C1 49 | 1063. RY ( 9)Sb 47       | 0.18  | 1.49  | 0.015 |
| 102. LP ( 2)C1 49 | 1068. RY (14)Sb 47       | 0.14  | 1.46  | 0.013 |
| 102. LP ( 2)C1 49 | 1072. RY (18)Sb 47       | 0.14  | 2.10  | 0.015 |
| 102. LP ( 2)C1 49 | 1073. RY (19)Sb 47       | 0.14  | 2.37  | 0.016 |
| 102. LP ( 2)C1 49 | 1085. RY (31)Sb 47       | 0.28  | 1.94  | 0.021 |
| 102. LP ( 2)C1 49 | 1090. RY (36)Sb 47       | 0.07  | 36.66 | 0.044 |
| 103. LP ( 3)C1 49 | 182. LV ( 1)Sb 47        | 0.44  | 0.34  | 0.011 |
| 103. LP ( 3)C1 49 | 183. LV ( 2)Sb 47        | 1.18  | 0.34  | 0.018 |
| 103. LP ( 3)C1 49 | 240. BD* ( 1)Sb 47-cl 51 | 0.95  | 0.39  | 0.017 |
| 103. LP ( 3)C1 49 | 1056. RY ( 2)Sb 47       | 0.20  | 1.09  | 0.013 |
| 103. LP ( 3)C1 49 | 1057. RY ( 3)Sb 47       | 0.48  | 1.00  | 0.019 |
| 103. LP ( 3)C1 49 | 1061. RY ( 7)Sb 47       | 0.09  | 1.52  | 0.010 |
| 103. LP ( 3)C1 49 | 1066. RY (12)Sb 47       | 0.24  | 1.60  | 0.018 |
| 103. LP ( 3)C1 49 | 1071. RY (17)Sb 47       | 0.23  | 2.02  | 0.019 |
| 103. LP ( 3)C1 49 | 1073. RY (19)Sb 47       | 0.06  | 2.40  | 0.011 |
| 103. LP ( 3)C1 49 | 1086. RY (32)Sb 47       | 0.06  | 33.31 | 0.041 |
| 103. LP ( 3)C1 49 | 1178. RY ( 3)C1 51       | 0.10  | 0.95  | 0.009 |
| 103. LP ( 3)C1 49 | 1181. RY ( 6)C1 51       | 0.08  | 1.77  | 0.011 |
| 104. LP ( 4)C1 49 | 182. LV ( 1)Sb 47        | 9.25  | 0.43  | 0.056 |
| 104. LP ( 4)C1 49 | 183. LV ( 2)Sb 47        | 44.73 | 0.43  | 0.124 |
| 104. LP ( 4)C1 49 | 240. BD* ( 1)Sb 47-cl 51 | 2.36  | 0.48  | 0.030 |
| 104. LP ( 4)C1 49 | 1055. RY ( 1)Sb 47       | 0.16  | 1.26  | 0.013 |
| 104. LP ( 4)C1 49 | 1056. RY ( 2)Sb 47       | 0.16  | 1.18  | 0.012 |
| 104. LP ( 4)C1 49 | 1057. RY ( 3)Sb 47       | 0.15  | 1.09  | 0.012 |
| 104. LP ( 4)C1 49 | 1059. RY ( 5)Sb 47       | 1.33  | 1.65  | 0.042 |
| 104. LP ( 4)C1 49 | 1060. RY ( 6)Sb 47       | 0.34  | 1.17  | 0.018 |
| 104. LP ( 4)C1 49 | 1061. RY ( 7)Sb 47       | 0.83  | 1.61  | 0.033 |
| 104. LP ( 4)C1 49 | 1062. RY ( 8)Sb 47       | 0.26  | 1.05  | 0.015 |
| 104. LP ( 4)C1 49 | 1063. RY ( 9)Sb 47       | 0.14  | 1.61  | 0.014 |
| 104. LP ( 4)C1 49 | 1064. RY (10)Sb 47       | 1.49  | 2.38  | 0.053 |
| 104. LP ( 4)C1 49 | 1065. RY (11)Sb 47       | 0.36  | 2.63  | 0.027 |
| 104. LP ( 4)C1 49 | 1066. RY (12)Sb 47       | 0.59  | 1.69  | 0.028 |
| 104. LP ( 4)C1 49 | 1067. RY (13)Sb 47       | 0.16  | 1.68  | 0.015 |
| 104. LP ( 4)C1 49 | 1068. RY (14)Sb 47       | 0.07  | 1.58  | 0.009 |
| 104. LP ( 4)C1 49 | 1069. RY (15)Sb 47       | 0.23  | 1.53  | 0.017 |
| 104. LP ( 4)C1 49 | 1070. RY (16)Sb 47       | 1.47  | 5.02  | 0.077 |
| 104. LP ( 4)C1 49 | 1071. RY (17)Sb 47       | 0.17  | 2.11  | 0.017 |
| 104. LP ( 4)C1 49 | 1073. RY (19)Sb 47       | 0.46  | 2.49  | 0.030 |
| 104. LP ( 4)C1 49 | 1074. RY (20)Sb 47       | 0.07  | 2.29  | 0.012 |
| 104. LP ( 4)C1 49 | 1075. RY (21)Sb 47       | 0.34  | 2.97  | 0.028 |
| 104. LP ( 4)C1 49 | 1076. RY (22)Sb 47       | 0.60  | 10.16 | 0.070 |
| 104. LP ( 4)C1 49 | 1077. RY (23)Sb 47       | 0.10  | 2.07  | 0.013 |
| 104. LP ( 4)C1 49 | 1078. RY (24)Sb 47       | 0.19  | 2.67  | 0.020 |

|                       |                    |       |        |       |
|-----------------------|--------------------|-------|--------|-------|
| 104. LP ( 4)C1 49     | 1079. RY (25)Sb 47 | 0.42  | 2.92   | 0.031 |
| 104. LP ( 4)C1 49     | 1080. RY (26)Sb 47 | 0.25  | 4.35   | 0.030 |
| 104. LP ( 4)C1 49     | 1081. RY (27)Sb 47 | 0.82  | 8.05   | 0.072 |
| 104. LP ( 4)C1 49     | 1083. RY (29)Sb 47 | 1.47  | 33.87  | 0.199 |
| 104. LP ( 4)C1 49     | 1087. RY (33)Sb 47 | 0.37  | 8.19   | 0.049 |
| 104. LP ( 4)C1 49     | 1088. RY (34)Sb 47 | 0.52  | 5.87   | 0.049 |
| 104. LP ( 4)C1 49     | 1089. RY (35)Sb 47 | 0.17  | 93.70  | 0.112 |
| 104. LP ( 4)C1 49     | 1090. RY (36)Sb 47 | 0.47  | 36.78  | 0.118 |
| 104. LP ( 4)C1 49     | 1091. RY (37)Sb 47 | 1.30  | 36.90  | 0.195 |
| 104. LP ( 4)C1 49     | 1177. RY ( 2)C1 51 | 0.05  | 2.57   | 0.011 |
| from unit 5 to unit 4 |                    |       |        |       |
| None above threshold  |                    |       |        |       |
| within unit 5         |                    |       |        |       |
| 57. CR ( 1)C1 49      | 1144. RY (25)C1 49 | 0.83  | 114.39 | 0.276 |
| 58. CR ( 2)C1 49      | 1130. RY (11)C1 49 | 2.11  | 18.54  | 0.177 |
| 58. CR ( 2)C1 49      | 1131. RY (12)C1 49 | 1.28  | 19.23  | 0.140 |
| 58. CR ( 2)C1 49      | 1134. RY (15)C1 49 | 0.53  | 18.26  | 0.088 |
| 58. CR ( 2)C1 49      | 1143. RY (24)C1 49 | 1.04  | 18.95  | 0.125 |
| 58. CR ( 2)C1 49      | 1144. RY (25)C1 49 | 4.63  | 27.07  | 0.316 |
| 59. CR ( 3)C1 49      | 1120. RY ( 1)C1 49 | 0.58  | 9.20   | 0.065 |
| 59. CR ( 3)C1 49      | 1124. RY ( 5)C1 49 | 0.53  | 10.25  | 0.066 |
| 59. CR ( 3)C1 49      | 1127. RY ( 8)C1 49 | 1.23  | 10.91  | 0.103 |
| 59. CR ( 3)C1 49      | 1130. RY (11)C1 49 | 0.81  | 12.14  | 0.089 |
| 59. CR ( 3)C1 49      | 1132. RY (13)C1 49 | 0.53  | 10.87  | 0.068 |
| 59. CR ( 3)C1 49      | 1135. RY (16)C1 49 | 0.77  | 11.31  | 0.083 |
| 59. CR ( 3)C1 49      | 1136. RY (17)C1 49 | 1.12  | 11.26  | 0.100 |
| 59. CR ( 3)C1 49      | 1139. RY (20)C1 49 | 1.37  | 17.68  | 0.139 |
| 59. CR ( 3)C1 49      | 1140. RY (21)C1 49 | 11.11 | 17.54  | 0.394 |
| 59. CR ( 3)C1 49      | 1141. RY (22)C1 49 | 9.22  | 17.72  | 0.361 |
| 60. CR ( 4)C1 49      | 1121. RY ( 2)C1 49 | 0.62  | 9.52   | 0.069 |
| 60. CR ( 4)C1 49      | 1127. RY ( 8)C1 49 | 0.53  | 10.91  | 0.068 |
| 60. CR ( 4)C1 49      | 1130. RY (11)C1 49 | 1.39  | 12.14  | 0.116 |
| 60. CR ( 4)C1 49      | 1133. RY (14)C1 49 | 0.68  | 11.23  | 0.078 |
| 60. CR ( 4)C1 49      | 1134. RY (15)C1 49 | 0.89  | 11.86  | 0.092 |
| 60. CR ( 4)C1 49      | 1135. RY (16)C1 49 | 0.94  | 11.31  | 0.092 |
| 60. CR ( 4)C1 49      | 1139. RY (20)C1 49 | 18.25 | 17.68  | 0.507 |
| 60. CR ( 4)C1 49      | 1140. RY (21)C1 49 | 1.70  | 17.54  | 0.154 |
| 60. CR ( 4)C1 49      | 1142. RY (23)C1 49 | 0.77  | 11.11  | 0.082 |
| 60. CR ( 4)C1 49      | 1143. RY (24)C1 49 | 0.55  | 12.55  | 0.074 |
| 61. CR ( 5)C1 49      | 1126. RY ( 7)C1 49 | 1.29  | 9.70   | 0.100 |
| 61. CR ( 5)C1 49      | 1133. RY (14)C1 49 | 2.40  | 11.23  | 0.147 |
| 61. CR ( 5)C1 49      | 1137. RY (18)C1 49 | 0.65  | 10.54  | 0.074 |
| 61. CR ( 5)C1 49      | 1139. RY (20)C1 49 | 0.73  | 17.68  | 0.102 |
| 61. CR ( 5)C1 49      | 1140. RY (21)C1 49 | 9.42  | 17.54  | 0.363 |
| 61. CR ( 5)C1 49      | 1141. RY (22)C1 49 | 11.66 | 17.72  | 0.406 |
| 61. CR ( 5)C1 49      | 1142. RY (23)C1 49 | 1.62  | 11.11  | 0.120 |
| 101. LP ( 1)C1 49     | 1125. RY ( 6)C1 49 | 2.40  | 1.67   | 0.057 |
| 101. LP ( 1)C1 49     | 1126. RY ( 7)C1 49 | 2.91  | 1.92   | 0.067 |
| 101. LP ( 1)C1 49     | 1127. RY ( 8)C1 49 | 2.33  | 3.14   | 0.076 |
| 101. LP ( 1)C1 49     | 1128. RY ( 9)C1 49 | 2.46  | 1.74   | 0.059 |
| 101. LP ( 1)C1 49     | 1130. RY (11)C1 49 | 1.17  | 4.37   | 0.064 |
| 101. LP ( 1)C1 49     | 1131. RY (12)C1 49 | 0.63  | 5.06   | 0.051 |
| 101. LP ( 1)C1 49     | 1135. RY (16)C1 49 | 0.90  | 3.54   | 0.050 |
| 101. LP ( 1)C1 49     | 1141. RY (22)C1 49 | 0.91  | 9.95   | 0.085 |
| 101. LP ( 1)C1 49     | 1143. RY (24)C1 49 | 0.83  | 4.77   | 0.056 |
| 101. LP ( 1)C1 49     | 1144. RY (25)C1 49 | 1.89  | 12.89  | 0.139 |
| 102. LP ( 2)C1 49     | 1122. RY ( 3)C1 49 | 4.29  | 1.03   | 0.059 |
| 102. LP ( 2)C1 49     | 1126. RY ( 7)C1 49 | 8.54  | 1.51   | 0.101 |
| 102. LP ( 2)C1 49     | 1127. RY ( 8)C1 49 | 1.87  | 2.73   | 0.064 |
| 102. LP ( 2)C1 49     | 1128. RY ( 9)C1 49 | 0.81  | 1.33   | 0.029 |
| 102. LP ( 2)C1 49     | 1132. RY (13)C1 49 | 0.97  | 2.68   | 0.045 |
| 102. LP ( 2)C1 49     | 1133. RY (14)C1 49 | 2.09  | 3.04   | 0.071 |
| 102. LP ( 2)C1 49     | 1137. RY (18)C1 49 | 1.08  | 2.36   | 0.045 |
| 102. LP ( 2)C1 49     | 1140. RY (21)C1 49 | 3.08  | 9.36   | 0.152 |
| 102. LP ( 2)C1 49     | 1141. RY (22)C1 49 | 1.16  | 9.54   | 0.094 |
| 102. LP ( 2)C1 49     | 1142. RY (23)C1 49 | 0.72  | 2.93   | 0.041 |
| 103. LP ( 3)C1 49     | 1121. RY ( 2)C1 49 | 3.87  | 1.37   | 0.065 |
| 103. LP ( 3)C1 49     | 1123. RY ( 4)C1 49 | 4.44  | 1.07   | 0.062 |
| 103. LP ( 3)C1 49     | 1124. RY ( 5)C1 49 | 4.59  | 2.10   | 0.088 |
| 103. LP ( 3)C1 49     | 1128. RY ( 9)C1 49 | 1.95  | 1.36   | 0.046 |
| 103. LP ( 3)C1 49     | 1133. RY (14)C1 49 | 1.27  | 3.07   | 0.056 |
| 103. LP ( 3)C1 49     | 1135. RY (16)C1 49 | 1.45  | 3.15   | 0.060 |
| 103. LP ( 3)C1 49     | 1136. RY (17)C1 49 | 0.88  | 3.10   | 0.047 |
| 103. LP ( 3)C1 49     | 1139. RY (20)C1 49 | 2.42  | 9.52   | 0.135 |
| 103. LP ( 3)C1 49     | 1141. RY (22)C1 49 | 1.21  | 9.57   | 0.096 |
| 104. LP ( 4)C1 49     | 1120. RY ( 1)C1 49 | 4.99  | 1.14   | 0.067 |
| 104. LP ( 4)C1 49     | 1121. RY ( 2)C1 49 | 1.38  | 1.46   | 0.040 |
| 104. LP ( 4)C1 49     | 1124. RY ( 5)C1 49 | 1.28  | 2.19   | 0.047 |
| 104. LP ( 4)C1 49     | 1126. RY ( 7)C1 49 | 0.56  | 1.63   | 0.027 |
| 104. LP ( 4)C1 49     | 1128. RY ( 9)C1 49 | 0.75  | 1.45   | 0.029 |
| 104. LP ( 4)C1 49     | 1130. RY (11)C1 49 | 3.06  | 4.07   | 0.100 |
| 104. LP ( 4)C1 49     | 1139. RY (20)C1 49 | 1.49  | 9.61   | 0.107 |
| 104. LP ( 4)C1 49     | 1140. RY (21)C1 49 | 0.87  | 9.47   | 0.081 |
| 104. LP ( 4)C1 49     | 1141. RY (22)C1 49 | 0.98  | 9.66   | 0.087 |
| from unit 5 to unit 6 |                    |       |        |       |
| 102. LP ( 2)C1 49     | 1148. RY ( 1)C1 50 | 0.06  | 1.05   | 0.007 |
| from unit 5 to unit 7 |                    |       |        |       |
| 104. LP ( 4)C1 49     | 1204. RY ( 1)C1 52 | 0.05  | 1.20   | 0.007 |
| 104. LP ( 4)C1 49     | 1208. RY ( 5)C1 52 | 0.08  | 2.62   | 0.013 |
| 104. LP ( 4)C1 49     | 1213. RY (10)C1 52 | 0.20  | 3.09   | 0.022 |
| 104. LP ( 4)C1 49     | 1214. RY (11)C1 52 | 0.08  | 4.35   | 0.017 |
| from unit 5 to unit 8 |                    |       |        |       |
| None above threshold  |                    |       |        |       |
| from unit 6 to unit 1 |                    |       |        |       |
| 64. CR ( 3)C1 50      | 256. RY ( 9)Pt 1   | 0.07  | 10.84  | 0.025 |
| 65. CR ( 4)C1 50      | 256. RY ( 9)Pt 1   | 0.05  | 10.84  | 0.021 |
| 65. CR ( 4)C1 50      | 312. RY ( 7) S 3   | 0.05  | 10.21  | 0.021 |

|                       |                          |       |       |       |
|-----------------------|--------------------------|-------|-------|-------|
| 105. LP ( 1)C1 50     | 255. RY ( 8)Pt 1         | 0.05  | 2.99  | 0.011 |
| 106. LP ( 2)C1 50     | 228. BD* ( 1) C 32- H 33 | 0.07  | 0.76  | 0.007 |
| 106. LP ( 2)C1 50     | 880. RY ( 6) C 32        | 0.06  | 1.61  | 0.008 |
| 106. LP ( 2)C1 50     | 901. RY ( 1) H 33        | 0.20  | 1.66  | 0.016 |
| 106. LP ( 2)C1 50     | 902. RY ( 2) H 33        | 0.10  | 2.26  | 0.013 |
| 107. LP ( 3)C1 50     | 184. BD* ( 1)Pt 1- S 2   | 0.09  | 0.36  | 0.005 |
| 107. LP ( 3)C1 50     | 185. BD* ( 1)Pt 1- S 3   | 0.06  | 0.37  | 0.004 |
| 107. LP ( 3)C1 50     | 189. BD* ( 1) S 3- C 35  | 0.58  | 0.30  | 0.012 |
| 107. LP ( 3)C1 50     | 228. BD* ( 1) C 32- H 33 | 0.05  | 0.79  | 0.006 |
| 107. LP ( 3)C1 50     | 250. RY ( 3)Pt 1         | 0.08  | 2.78  | 0.013 |
| 107. LP ( 3)C1 50     | 251. RY ( 4)Pt 1         | 0.16  | 2.21  | 0.017 |
| 107. LP ( 3)C1 50     | 254. RY ( 7)Pt 1         | 0.07  | 1.99  | 0.010 |
| 107. LP ( 3)C1 50     | 255. RY ( 8)Pt 1         | 0.07  | 2.60  | 0.012 |
| 107. LP ( 3)C1 50     | 256. RY ( 9)Pt 1         | 0.29  | 2.69  | 0.025 |
| 107. LP ( 3)C1 50     | 258. RY (11)Pt 1         | 0.10  | 2.80  | 0.015 |
| 107. LP ( 3)C1 50     | 260. RY (13)Pt 1         | 0.06  | 7.36  | 0.019 |
| 107. LP ( 3)C1 50     | 310. RY ( 5) S 3         | 0.06  | 3.73  | 0.013 |
| 107. LP ( 3)C1 50     | 312. RY ( 7) S 3         | 0.39  | 2.05  | 0.025 |
| 107. LP ( 3)C1 50     | 313. RY ( 8) S 3         | 0.07  | 1.81  | 0.010 |
| 107. LP ( 3)C1 50     | 317. RY (12) S 3         | 0.11  | 3.12  | 0.017 |
| 107. LP ( 3)C1 50     | 880. RY ( 6) C 32        | 0.08  | 1.64  | 0.010 |
| 107. LP ( 3)C1 50     | 901. RY ( 1) H 33        | 0.11  | 1.70  | 0.012 |
| 107. LP ( 3)C1 50     | 902. RY ( 2) H 33        | 0.06  | 2.29  | 0.011 |
| 108. LP ( 4)C1 50     | 248. RY ( 1)Pt 1         | 0.11  | 2.22  | 0.014 |
| 108. LP ( 4)C1 50     | 252. RY ( 5)Pt 1         | 0.06  | 2.76  | 0.012 |
| 108. LP ( 4)C1 50     | 253. RY ( 6)Pt 1         | 0.07  | 3.22  | 0.014 |
| from unit 6 to unit 2 |                          |       |       |       |
| 106. LP ( 2)C1 50     | 200. BD* ( 2) N 8- C 27  | 0.07  | 0.16  | 0.003 |
| 106. LP ( 2)C1 50     | 809. RY ( 2) C 27        | 0.24  | 1.26  | 0.016 |
| 106. LP ( 2)C1 50     | 813. RY ( 6) C 27        | 0.10  | 2.23  | 0.013 |
| 107. LP ( 3)C1 50     | 200. BD* ( 2) N 8- C 27  | 0.06  | 0.19  | 0.003 |
| 107. LP ( 3)C1 50     | 809. RY ( 2) C 27        | 0.11  | 1.29  | 0.010 |
| 107. LP ( 3)C1 50     | 813. RY ( 6) C 27        | 0.05  | 2.26  | 0.010 |
| from unit 6 to unit 3 |                          |       |       |       |
| 63. CR ( 2)C1 50      | 182. LV ( 1)Sb 47        | 0.27  | 14.91 | 0.056 |
| 63. CR ( 2)C1 50      | 1056. RY ( 2)Sb 47       | 0.10  | 15.65 | 0.035 |
| 63. CR ( 2)C1 50      | 1058. RY ( 4)Sb 47       | 0.24  | 15.49 | 0.054 |
| 64. CR ( 3)C1 50      | 1055. RY ( 1)Sb 47       | 0.06  | 9.32  | 0.021 |
| 64. CR ( 3)C1 50      | 1056. RY ( 2)Sb 47       | 0.10  | 9.24  | 0.027 |
| 64. CR ( 3)C1 50      | 1062. RY ( 8)Sb 47       | 0.05  | 9.11  | 0.020 |
| 65. CR ( 4)C1 50      | 1057. RY ( 3)Sb 47       | 0.06  | 9.15  | 0.020 |
| 66. CR ( 5)C1 50      | 182. LV ( 1)Sb 47        | 0.13  | 8.49  | 0.030 |
| 66. CR ( 5)C1 50      | 1056. RY ( 2)Sb 47       | 0.21  | 9.24  | 0.040 |
| 66. CR ( 5)C1 50      | 1057. RY ( 3)Sb 47       | 0.11  | 9.15  | 0.029 |
| 66. CR ( 5)C1 50      | 1063. RY ( 9)Sb 47       | 0.13  | 9.67  | 0.032 |
| 66. CR ( 5)C1 50      | 1064. RY (10)Sb 47       | 0.12  | 10.44 | 0.031 |
| 66. CR ( 5)C1 50      | 1067. RY (13)Sb 47       | 0.11  | 9.74  | 0.029 |
| 66. CR ( 5)C1 50      | 1070. RY (16)Sb 47       | 0.11  | 13.08 | 0.034 |
| 66. CR ( 5)C1 50      | 1074. RY (20)Sb 47       | 0.12  | 10.35 | 0.031 |
| 66. CR ( 5)C1 50      | 1078. RY (24)Sb 47       | 0.06  | 10.73 | 0.023 |
| 66. CR ( 5)C1 50      | 1084. RY (30)Sb 47       | 0.14  | 13.44 | 0.039 |
| 105. LP ( 1)C1 50     | 182. LV ( 1)Sb 47        | 6.63  | 0.72  | 0.062 |
| 105. LP ( 1)C1 50     | 183. LV ( 2)Sb 47        | 1.08  | 0.72  | 0.025 |
| 105. LP ( 1)C1 50     | 240. BD* ( 1)Sb 47-C1 51 | 0.07  | 0.77  | 0.007 |
| 105. LP ( 1)C1 50     | 1058. RY ( 4)Sb 47       | 0.21  | 1.30  | 0.015 |
| 105. LP ( 1)C1 50     | 1063. RY ( 9)Sb 47       | 0.05  | 1.90  | 0.009 |
| 105. LP ( 1)C1 50     | 1068. RY (14)Sb 47       | 0.30  | 1.87  | 0.021 |
| 105. LP ( 1)C1 50     | 1072. RY (18)Sb 47       | 0.16  | 2.51  | 0.018 |
| 105. LP ( 1)C1 50     | 1073. RY (19)Sb 47       | 0.29  | 2.78  | 0.025 |
| 105. LP ( 1)C1 50     | 1076. RY (22)Sb 47       | 0.10  | 10.44 | 0.029 |
| 105. LP ( 1)C1 50     | 1079. RY (25)Sb 47       | 0.11  | 3.21  | 0.017 |
| 105. LP ( 1)C1 50     | 1083. RY (29)Sb 47       | 0.05  | 34.16 | 0.037 |
| 105. LP ( 1)C1 50     | 1090. RY (36)Sb 47       | 0.07  | 37.06 | 0.046 |
| 106. LP ( 2)C1 50     | 182. LV ( 1)Sb 47        | 0.28  | 0.31  | 0.008 |
| 106. LP ( 2)C1 50     | 183. LV ( 2)Sb 47        | 1.44  | 0.31  | 0.019 |
| 106. LP ( 2)C1 50     | 240. BD* ( 1)Sb 47-C1 51 | 0.08  | 0.35  | 0.005 |
| 106. LP ( 2)C1 50     | 1056. RY ( 2)Sb 47       | 0.07  | 1.05  | 0.008 |
| 106. LP ( 2)C1 50     | 1057. RY ( 3)Sb 47       | 0.18  | 0.96  | 0.012 |
| 106. LP ( 2)C1 50     | 1064. RY (10)Sb 47       | 0.08  | 2.25  | 0.012 |
| 106. LP ( 2)C1 50     | 1069. RY (15)Sb 47       | 0.14  | 1.40  | 0.012 |
| 106. LP ( 2)C1 50     | 1071. RY (17)Sb 47       | 0.30  | 1.99  | 0.022 |
| 106. LP ( 2)C1 50     | 1072. RY (18)Sb 47       | 0.09  | 2.10  | 0.013 |
| 106. LP ( 2)C1 50     | 1085. RY (31)Sb 47       | 0.24  | 1.93  | 0.019 |
| 106. LP ( 2)C1 50     | 1091. RY (37)Sb 47       | 0.06  | 36.78 | 0.041 |
| 107. LP ( 3)C1 50     | 182. LV ( 1)Sb 47        | 1.85  | 0.34  | 0.022 |
| 107. LP ( 3)C1 50     | 183. LV ( 2)Sb 47        | 0.05  | 0.34  | 0.004 |
| 107. LP ( 3)C1 50     | 240. BD* ( 1)Sb 47-C1 51 | 0.91  | 0.38  | 0.017 |
| 107. LP ( 3)C1 50     | 1058. RY ( 4)Sb 47       | 0.67  | 0.92  | 0.022 |
| 107. LP ( 3)C1 50     | 1059. RY ( 5)Sb 47       | 0.08  | 1.56  | 0.010 |
| 107. LP ( 3)C1 50     | 1061. RY ( 7)Sb 47       | 0.10  | 1.52  | 0.011 |
| 107. LP ( 3)C1 50     | 1067. RY (13)Sb 47       | 0.21  | 1.58  | 0.016 |
| 107. LP ( 3)C1 50     | 1071. RY (17)Sb 47       | 0.07  | 2.02  | 0.010 |
| 107. LP ( 3)C1 50     | 1072. RY (18)Sb 47       | 0.13  | 2.13  | 0.015 |
| 107. LP ( 3)C1 50     | 1073. RY (19)Sb 47       | 0.07  | 2.39  | 0.011 |
| 107. LP ( 3)C1 50     | 1074. RY (20)Sb 47       | 0.09  | 2.19  | 0.013 |
| 107. LP ( 3)C1 50     | 1086. RY (32)Sb 47       | 0.05  | 33.31 | 0.038 |
| 107. LP ( 3)C1 50     | 1181. RY ( 6)C1 51       | 0.09  | 1.77  | 0.011 |
| 107. LP ( 3)C1 50     | 1182. RY ( 7)C1 51       | 0.05  | 1.39  | 0.008 |
| 108. LP ( 4)C1 50     | 182. LV ( 1)Sb 47        | 41.80 | 0.42  | 0.118 |
| 108. LP ( 4)C1 50     | 183. LV ( 2)Sb 47        | 5.73  | 0.42  | 0.044 |
| 108. LP ( 4)C1 50     | 240. BD* ( 1)Sb 47-C1 51 | 1.32  | 0.46  | 0.022 |
| 108. LP ( 4)C1 50     | 1055. RY ( 1)Sb 47       | 0.05  | 1.25  | 0.007 |
| 108. LP ( 4)C1 50     | 1056. RY ( 2)Sb 47       | 0.10  | 1.16  | 0.010 |
| 108. LP ( 4)C1 50     | 1057. RY ( 3)Sb 47       | 0.09  | 1.07  | 0.009 |
| 108. LP ( 4)C1 50     | 1058. RY ( 4)Sb 47       | 0.14  | 1.00  | 0.011 |
| 108. LP ( 4)C1 50     | 1059. RY ( 5)Sb 47       | 1.16  | 1.64  | 0.039 |
| 108. LP ( 4)C1 50     | 1060. RY ( 6)Sb 47       | 0.11  | 1.16  | 0.010 |
| 108. LP ( 4)C1 50     | 1061. RY ( 7)Sb 47       | 0.68  | 1.60  | 0.029 |
| 108. LP ( 4)C1 50     | 1062. RY ( 8)Sb 47       | 0.22  | 1.03  | 0.014 |
| 108. LP ( 4)C1 50     | 1063. RY ( 9)Sb 47       | 0.54  | 1.59  | 0.026 |
| 108. LP ( 4)C1 50     | 1064. RY (10)Sb 47       | 0.63  | 2.37  | 0.034 |

|                       |                    |       |       |       |
|-----------------------|--------------------|-------|-------|-------|
| 108. LP ( 4)C1 50     | 1065. RY (11)Sb 47 | 0.64  | 2.61  | 0.036 |
| 108. LP ( 4)C1 50     | 1066. RY (12)Sb 47 | 0.31  | 1.68  | 0.020 |
| 108. LP ( 4)C1 50     | 1067. RY (13)Sb 47 | 0.33  | 1.66  | 0.021 |
| 108. LP ( 4)C1 50     | 1068. RY (14)Sb 47 | 0.30  | 1.56  | 0.019 |
| 108. LP ( 4)C1 50     | 1070. RY (16)Sb 47 | 1.37  | 5.00  | 0.074 |
| 108. LP ( 4)C1 50     | 1072. RY (18)Sb 47 | 0.10  | 2.21  | 0.013 |
| 108. LP ( 4)C1 50     | 1073. RY (19)Sb 47 | 0.79  | 2.47  | 0.039 |
| 108. LP ( 4)C1 50     | 1074. RY (20)Sb 47 | 0.62  | 2.27  | 0.033 |
| 108. LP ( 4)C1 50     | 1075. RY (21)Sb 47 | 0.33  | 2.96  | 0.028 |
| 108. LP ( 4)C1 50     | 1076. RY (22)Sb 47 | 0.46  | 10.14 | 0.061 |
| 108. LP ( 4)C1 50     | 1078. RY (24)Sb 47 | 0.21  | 2.66  | 0.021 |
| 108. LP ( 4)C1 50     | 1080. RY (26)Sb 47 | 0.32  | 4.34  | 0.033 |
| 108. LP ( 4)C1 50     | 1081. RY (27)Sb 47 | 0.52  | 8.04  | 0.058 |
| 108. LP ( 4)C1 50     | 1083. RY (29)Sb 47 | 0.89  | 33.86 | 0.155 |
| 108. LP ( 4)C1 50     | 1084. RY (30)Sb 47 | 1.72  | 5.37  | 0.086 |
| 108. LP ( 4)C1 50     | 1086. RY (32)Sb 47 | 0.06  | 33.39 | 0.041 |
| 108. LP ( 4)C1 50     | 1087. RY (33)Sb 47 | 0.56  | 8.17  | 0.060 |
| 108. LP ( 4)C1 50     | 1088. RY (34)Sb 47 | 0.11  | 5.85  | 0.022 |
| 108. LP ( 4)C1 50     | 1089. RY (35)Sb 47 | 0.15  | 93.68 | 0.108 |
| 108. LP ( 4)C1 50     | 1090. RY (36)Sb 47 | 0.81  | 36.76 | 0.154 |
| 108. LP ( 4)C1 50     | 1091. RY (37)Sb 47 | 0.63  | 36.89 | 0.136 |
| 108. LP ( 4)C1 50     | 1177. RY ( 2)C1 51 | 0.06  | 2.55  | 0.011 |
| from unit 6 to unit 4 |                    |       |       |       |
| 108. LP ( 4)C1 50     | 1096. RY ( 5)C1 48 | 0.10  | 1.66  | 0.011 |
| 108. LP ( 4)C1 50     | 1101. RY (10)C1 48 | 0.21  | 3.16  | 0.023 |
| from unit 6 to unit 5 |                    |       |       |       |
| 106. LP ( 2)C1 50     | 1120. RY ( 1)C1 49 | 0.06  | 1.01  | 0.007 |
| 106. LP ( 2)C1 50     | 1127. RY ( 8)C1 49 | 0.06  | 2.72  | 0.012 |
| within unit 6         |                    |       |       |       |
| 63. CR ( 2)C1 50      | 1157. RY (10)C1 50 | 2.04  | 18.62 | 0.174 |
| 63. CR ( 2)C1 50      | 1160. RY (13)C1 50 | 0.88  | 18.91 | 0.115 |
| 63. CR ( 2)C1 50      | 1161. RY (14)C1 50 | 1.43  | 19.58 | 0.149 |
| 63. CR ( 2)C1 50      | 1162. RY (15)C1 50 | 0.67  | 17.81 | 0.098 |
| 63. CR ( 2)C1 50      | 1171. RY (24)C1 50 | 1.18  | 18.91 | 0.134 |
| 63. CR ( 2)C1 50      | 1172. RY (25)C1 50 | 1.43  | 19.11 | 0.148 |
| 63. CR ( 2)C1 50      | 1173. RY (26)C1 50 | 2.67  | 21.80 | 0.215 |
| 63. CR ( 2)C1 50      | 1174. RY (27)C1 50 | 1.11  | 19.02 | 0.130 |
| 64. CR ( 3)C1 50      | 1155. RY ( 8)C1 50 | 1.01  | 10.64 | 0.093 |
| 64. CR ( 3)C1 50      | 1157. RY (10)C1 50 | 0.57  | 12.21 | 0.075 |
| 64. CR ( 3)C1 50      | 1158. RY (11)C1 50 | 0.97  | 11.41 | 0.094 |
| 64. CR ( 3)C1 50      | 1160. RY (13)C1 50 | 0.76  | 12.50 | 0.087 |
| 64. CR ( 3)C1 50      | 1163. RY (16)C1 50 | 0.55  | 10.63 | 0.068 |
| 64. CR ( 3)C1 50      | 1166. RY (19)C1 50 | 0.89  | 10.82 | 0.088 |
| 64. CR ( 3)C1 50      | 1167. RY (20)C1 50 | 16.21 | 18.08 | 0.483 |
| 64. CR ( 3)C1 50      | 1168. RY (21)C1 50 | 2.12  | 17.89 | 0.174 |
| 64. CR ( 3)C1 50      | 1169. RY (22)C1 50 | 3.37  | 17.35 | 0.216 |
| 65. CR ( 4)C1 50      | 1150. RY ( 3)C1 50 | 0.55  | 9.18  | 0.063 |
| 65. CR ( 4)C1 50      | 1158. RY (11)C1 50 | 0.71  | 11.41 | 0.080 |
| 65. CR ( 4)C1 50      | 1161. RY (14)C1 50 | 1.03  | 13.16 | 0.104 |
| 65. CR ( 4)C1 50      | 1164. RY (17)C1 50 | 2.05  | 11.54 | 0.137 |
| 65. CR ( 4)C1 50      | 1167. RY (20)C1 50 | 2.97  | 18.08 | 0.207 |
| 65. CR ( 4)C1 50      | 1169. RY (22)C1 50 | 19.75 | 17.35 | 0.523 |
| 66. CR ( 5)C1 50      | 1148. RY ( 1)C1 50 | 1.02  | 9.23  | 0.087 |
| 66. CR ( 5)C1 50      | 1154. RY ( 7)C1 50 | 1.30  | 9.72  | 0.100 |
| 66. CR ( 5)C1 50      | 1155. RY ( 8)C1 50 | 0.64  | 10.65 | 0.074 |
| 66. CR ( 5)C1 50      | 1157. RY (10)C1 50 | 3.22  | 12.21 | 0.177 |
| 66. CR ( 5)C1 50      | 1163. RY (16)C1 50 | 0.66  | 10.63 | 0.075 |
| 66. CR ( 5)C1 50      | 1167. RY (20)C1 50 | 1.15  | 18.08 | 0.129 |
| 66. CR ( 5)C1 50      | 1168. RY (21)C1 50 | 18.44 | 17.89 | 0.513 |
| 105. LP ( 1)C1 50     | 1153. RY ( 6)C1 50 | 1.07  | 1.86  | 0.040 |
| 105. LP ( 1)C1 50     | 1154. RY ( 7)C1 50 | 4.57  | 1.95  | 0.084 |
| 105. LP ( 1)C1 50     | 1155. RY ( 8)C1 50 | 3.02  | 2.87  | 0.083 |
| 105. LP ( 1)C1 50     | 1156. RY ( 9)C1 50 | 1.42  | 2.03  | 0.048 |
| 105. LP ( 1)C1 50     | 1157. RY (10)C1 50 | 1.01  | 4.44  | 0.060 |
| 105. LP ( 1)C1 50     | 1158. RY (11)C1 50 | 0.62  | 3.64  | 0.042 |
| 105. LP ( 1)C1 50     | 1160. RY (13)C1 50 | 0.57  | 4.73  | 0.046 |
| 105. LP ( 1)C1 50     | 1162. RY (15)C1 50 | 1.04  | 3.63  | 0.055 |
| 105. LP ( 1)C1 50     | 1168. RY (21)C1 50 | 1.00  | 10.11 | 0.090 |
| 105. LP ( 1)C1 50     | 1171. RY (24)C1 50 | 0.89  | 4.72  | 0.058 |
| 105. LP ( 1)C1 50     | 1172. RY (25)C1 50 | 1.33  | 4.92  | 0.072 |
| 105. LP ( 1)C1 50     | 1173. RY (26)C1 50 | 1.38  | 7.62  | 0.092 |
| 105. LP ( 1)C1 50     | 1174. RY (27)C1 50 | 0.65  | 4.84  | 0.050 |
| 106. LP ( 2)C1 50     | 1150. RY ( 3)C1 50 | 3.57  | 1.00  | 0.053 |
| 106. LP ( 2)C1 50     | 1153. RY ( 6)C1 50 | 3.21  | 1.45  | 0.061 |
| 106. LP ( 2)C1 50     | 1154. RY ( 7)C1 50 | 3.85  | 1.54  | 0.069 |
| 106. LP ( 2)C1 50     | 1155. RY ( 8)C1 50 | 4.02  | 2.46  | 0.089 |
| 106. LP ( 2)C1 50     | 1160. RY (13)C1 50 | 0.86  | 4.31  | 0.054 |
| 106. LP ( 2)C1 50     | 1163. RY (16)C1 50 | 0.53  | 2.44  | 0.032 |
| 106. LP ( 2)C1 50     | 1164. RY (17)C1 50 | 1.15  | 3.35  | 0.055 |
| 106. LP ( 2)C1 50     | 1166. RY (19)C1 50 | 0.57  | 2.63  | 0.035 |
| 106. LP ( 2)C1 50     | 1168. RY (21)C1 50 | 0.78  | 9.70  | 0.077 |
| 106. LP ( 2)C1 50     | 1169. RY (22)C1 50 | 3.44  | 9.16  | 0.158 |
| 107. LP ( 3)C1 50     | 1149. RY ( 2)C1 50 | 3.63  | 1.37  | 0.063 |
| 107. LP ( 3)C1 50     | 1150. RY ( 3)C1 50 | 1.53  | 1.03  | 0.035 |
| 107. LP ( 3)C1 50     | 1151. RY ( 4)C1 50 | 5.83  | 1.07  | 0.071 |
| 107. LP ( 3)C1 50     | 1152. RY ( 5)C1 50 | 4.51  | 1.59  | 0.076 |
| 107. LP ( 3)C1 50     | 1156. RY ( 9)C1 50 | 1.94  | 1.64  | 0.050 |
| 107. LP ( 3)C1 50     | 1158. RY (11)C1 50 | 1.38  | 3.26  | 0.060 |
| 107. LP ( 3)C1 50     | 1161. RY (14)C1 50 | 0.72  | 5.01  | 0.054 |
| 107. LP ( 3)C1 50     | 1164. RY (17)C1 50 | 0.83  | 3.38  | 0.047 |
| 107. LP ( 3)C1 50     | 1167. RY (20)C1 50 | 2.15  | 9.92  | 0.130 |
| 107. LP ( 3)C1 50     | 1169. RY (22)C1 50 | 0.97  | 9.20  | 0.084 |
| 108. LP ( 4)C1 50     | 1148. RY ( 1)C1 50 | 4.90  | 1.15  | 0.067 |
| 108. LP ( 4)C1 50     | 1149. RY ( 2)C1 50 | 1.62  | 1.45  | 0.043 |
| 108. LP ( 4)C1 50     | 1152. RY ( 5)C1 50 | 1.45  | 1.67  | 0.044 |
| 108. LP ( 4)C1 50     | 1154. RY ( 7)C1 50 | 0.83  | 1.65  | 0.033 |
| 108. LP ( 4)C1 50     | 1157. RY (10)C1 50 | 4.17  | 4.13  | 0.117 |
| 108. LP ( 4)C1 50     | 1167. RY (20)C1 50 | 1.25  | 10.00 | 0.100 |
| 108. LP ( 4)C1 50     | 1168. RY (21)C1 50 | 1.96  | 9.81  | 0.124 |

|                       |                         |       |       |       |  |
|-----------------------|-------------------------|-------|-------|-------|--|
| from unit 6 to unit 7 |                         |       |       |       |  |
| 106. LP (2)C1 50      | 1207. RY (4)C1 52       | 0.06  | 1.02  | 0.007 |  |
| 106. LP (2)C1 50      | 1210. RY (7)C1 52       | 0.07  | 2.19  | 0.011 |  |
| from unit 6 to unit 8 |                         |       |       |       |  |
| None above threshold  |                         |       |       |       |  |
| from unit 7 to unit 1 |                         |       |       |       |  |
| None above threshold  |                         |       |       |       |  |
| from unit 7 to unit 2 |                         |       |       |       |  |
| 74. CR (3)C1 52       | 696. RY (3) C 21        | 0.06  | 9.71  | 0.022 |  |
| 74. CR (3)C1 52       | 706. RY (13) C 21       | 0.08  | 10.97 | 0.026 |  |
| 74. CR (3)C1 52       | 720. RY (1) C 22        | 0.07  | 10.47 | 0.024 |  |
| 74. CR (3)C1 52       | 722. RY (3) C 22        | 0.16  | 9.70  | 0.035 |  |
| 74. CR (3)C1 52       | 730. RY (11) C 22       | 0.09  | 11.87 | 0.029 |  |
| 75. CR (4)C1 52       | 722. RY (3) C 22        | 0.11  | 9.70  | 0.029 |  |
| 75. CR (4)C1 52       | 730. RY (11) C 22       | 0.06  | 11.87 | 0.024 |  |
| 112. LP (1)C1 52      | 697. RY (4) C 21        | 0.08  | 1.77  | 0.011 |  |
| 112. LP (1)C1 52      | 706. RY (13) C 21       | 0.11  | 3.22  | 0.017 |  |
| 113. LP (2)C1 52      | 697. RY (4) C 21        | 0.07  | 1.34  | 0.008 |  |
| 113. LP (2)C1 52      | 720. RY (1) C 22        | 0.06  | 2.29  | 0.011 |  |
| 113. LP (2)C1 52      | 722. RY (3) C 22        | 0.06  | 1.52  | 0.008 |  |
| 113. LP (2)C1 52      | 729. RY (10) C 22       | 0.07  | 3.21  | 0.013 |  |
| 114. LP (3)C1 52      | 217. BD* (2) C 21- C 22 | 0.07  | 0.21  | 0.003 |  |
| 114. LP (3)C1 52      | 611. RY (1) C 17        | 0.05  | 2.45  | 0.010 |  |
| 114. LP (3)C1 52      | 671. RY (4) C 20        | 0.06  | 1.51  | 0.009 |  |
| 114. LP (3)C1 52      | 697. RY (4) C 21        | 0.35  | 1.34  | 0.019 |  |
| 114. LP (3)C1 52      | 704. RY (11) C 21       | 0.06  | 2.68  | 0.011 |  |
| 114. LP (3)C1 52      | 706. RY (13) C 21       | 0.38  | 2.79  | 0.029 |  |
| 114. LP (3)C1 52      | 720. RY (1) C 22        | 0.09  | 2.29  | 0.013 |  |
| 114. LP (3)C1 52      | 722. RY (3) C 22        | 0.60  | 1.52  | 0.027 |  |
| 114. LP (3)C1 52      | 729. RY (10) C 22       | 0.10  | 3.21  | 0.016 |  |
| 114. LP (3)C1 52      | 730. RY (11) C 22       | 0.44  | 3.69  | 0.036 |  |
| 114. LP (3)C1 52      | 732. RY (13) C 22       | 0.08  | 3.19  | 0.015 |  |
| 115. LP (4)C1 52      | 217. BD* (2) C 21- C 22 | 0.08  | 0.30  | 0.005 |  |
| 115. LP (4)C1 52      | 696. RY (3) C 21        | 0.08  | 1.62  | 0.010 |  |
| 115. LP (4)C1 52      | 706. RY (13) C 21       | 0.08  | 2.89  | 0.014 |  |
| 115. LP (4)C1 52      | 722. RY (3) C 22        | 0.14  | 1.62  | 0.013 |  |
| 115. LP (4)C1 52      | 730. RY (11) C 22       | 0.06  | 3.79  | 0.013 |  |
| from unit 7 to unit 3 |                         |       |       |       |  |
| 73. CR (2)C1 52       | 183. LV (2)Sb 47        | 0.25  | 14.99 | 0.055 |  |
| 73. CR (2)C1 52       | 1056. RY (2)Sb 47       | 0.22  | 15.73 | 0.053 |  |
| 73. CR (2)C1 52       | 1057. RY (3)Sb 47       | 0.09  | 15.64 | 0.033 |  |
| 73. CR (2)C1 52       | 1064. RY (10)Sb 47      | 0.09  | 16.94 | 0.035 |  |
| 74. CR (3)C1 52       | 1055. RY (1)Sb 47       | 0.08  | 9.31  | 0.025 |  |
| 74. CR (3)C1 52       | 1056. RY (2)Sb 47       | 0.09  | 9.23  | 0.025 |  |
| 74. CR (3)C1 52       | 1064. RY (10)Sb 47      | 0.10  | 10.43 | 0.028 |  |
| 74. CR (3)C1 52       | 1074. RY (20)Sb 47      | 0.05  | 10.34 | 0.021 |  |
| 74. CR (3)C1 52       | 1084. RY (30)Sb 47      | 0.06  | 13.43 | 0.026 |  |
| 75. CR (4)C1 52       | 183. LV (2)Sb 47        | 0.12  | 8.49  | 0.028 |  |
| 75. CR (4)C1 52       | 1056. RY (2)Sb 47       | 0.18  | 9.23  | 0.036 |  |
| 75. CR (4)C1 52       | 1064. RY (10)Sb 47      | 0.24  | 10.43 | 0.045 |  |
| 75. CR (4)C1 52       | 1069. RY (15)Sb 47      | 0.07  | 9.58  | 0.023 |  |
| 75. CR (4)C1 52       | 1070. RY (16)Sb 47      | 0.12  | 13.07 | 0.035 |  |
| 75. CR (4)C1 52       | 1074. RY (20)Sb 47      | 0.07  | 10.34 | 0.025 |  |
| 75. CR (4)C1 52       | 1078. RY (24)Sb 47      | 0.06  | 10.72 | 0.023 |  |
| 75. CR (4)C1 52       | 1084. RY (30)Sb 47      | 0.13  | 13.44 | 0.038 |  |
| 76. CR (5)C1 52       | 1058. RY (4)Sb 47       | 0.10  | 9.06  | 0.027 |  |
| 112. LP (1)C1 52      | 182. LV (1)Sb 47        | 1.28  | 0.74  | 0.027 |  |
| 112. LP (1)C1 52      | 183. LV (2)Sb 47        | 7.01  | 0.74  | 0.064 |  |
| 112. LP (1)C1 52      | 240. BD* (1)Sb 47-C1 51 | 0.11  | 0.78  | 0.008 |  |
| 112. LP (1)C1 52      | 1057. RY (3)Sb 47       | 0.28  | 1.39  | 0.018 |  |
| 112. LP (1)C1 52      | 1069. RY (15)Sb 47      | 0.15  | 1.83  | 0.015 |  |
| 112. LP (1)C1 52      | 1071. RY (17)Sb 47      | 0.42  | 2.42  | 0.028 |  |
| 112. LP (1)C1 52      | 1072. RY (18)Sb 47      | 0.19  | 2.53  | 0.020 |  |
| 112. LP (1)C1 52      | 1073. RY (19)Sb 47      | 0.11  | 2.79  | 0.016 |  |
| 112. LP (1)C1 52      | 1076. RY (22)Sb 47      | 0.13  | 10.46 | 0.033 |  |
| 112. LP (1)C1 52      | 1091. RY (37)Sb 47      | 0.10  | 37.21 | 0.054 |  |
| 113. LP (2)C1 52      | 182. LV (1)Sb 47        | 0.72  | 0.30  | 0.013 |  |
| 113. LP (2)C1 52      | 183. LV (2)Sb 47        | 1.27  | 0.30  | 0.018 |  |
| 113. LP (2)C1 52      | 240. BD* (1)Sb 47-C1 51 | 0.06  | 0.35  | 0.004 |  |
| 113. LP (2)C1 52      | 1057. RY (3)Sb 47       | 0.09  | 0.96  | 0.008 |  |
| 113. LP (2)C1 52      | 1058. RY (4)Sb 47       | 0.20  | 0.89  | 0.012 |  |
| 113. LP (2)C1 52      | 1063. RY (9)Sb 47       | 0.13  | 1.48  | 0.012 |  |
| 113. LP (2)C1 52      | 1068. RY (14)Sb 47      | 0.08  | 1.45  | 0.010 |  |
| 113. LP (2)C1 52      | 1073. RY (19)Sb 47      | 0.14  | 2.36  | 0.016 |  |
| 113. LP (2)C1 52      | 1079. RY (25)Sb 47      | 0.08  | 2.79  | 0.014 |  |
| 113. LP (2)C1 52      | 1082. RY (28)Sb 47      | 0.05  | 2.44  | 0.010 |  |
| 113. LP (2)C1 52      | 1085. RY (31)Sb 47      | 0.13  | 1.93  | 0.014 |  |
| 113. LP (2)C1 52      | 1090. RY (36)Sb 47      | 0.06  | 36.65 | 0.043 |  |
| 114. LP (3)C1 52      | 182. LV (1)Sb 47        | 0.31  | 0.30  | 0.009 |  |
| 114. LP (3)C1 52      | 240. BD* (1)Sb 47-C1 51 | 0.97  | 0.35  | 0.016 |  |
| 114. LP (3)C1 52      | 1056. RY (2)Sb 47       | 0.06  | 1.05  | 0.007 |  |
| 114. LP (3)C1 52      | 1057. RY (3)Sb 47       | 0.24  | 0.96  | 0.014 |  |
| 114. LP (3)C1 52      | 1059. RY (5)Sb 47       | 0.15  | 1.52  | 0.014 |  |
| 114. LP (3)C1 52      | 1060. RY (6)Sb 47       | 0.06  | 1.04  | 0.007 |  |
| 114. LP (3)C1 52      | 1066. RY (12)Sb 47      | 0.18  | 1.56  | 0.015 |  |
| 114. LP (3)C1 52      | 1072. RY (18)Sb 47      | 0.13  | 2.09  | 0.015 |  |
| 114. LP (3)C1 52      | 1075. RY (21)Sb 47      | 0.28  | 2.84  | 0.025 |  |
| 114. LP (3)C1 52      | 1181. RY (6)C1 51       | 0.08  | 1.73  | 0.011 |  |
| 115. LP (4)C1 52      | 182. LV (1)Sb 47        | 6.17  | 0.40  | 0.044 |  |
| 115. LP (4)C1 52      | 183. LV (2)Sb 47        | 40.10 | 0.40  | 0.113 |  |
| 115. LP (4)C1 52      | 240. BD* (1)Sb 47-C1 51 | 1.85  | 0.44  | 0.026 |  |
| 115. LP (4)C1 52      | 1055. RY (1)Sb 47       | 0.09  | 1.23  | 0.009 |  |
| 115. LP (4)C1 52      | 1056. RY (2)Sb 47       | 0.42  | 1.14  | 0.020 |  |
| 115. LP (4)C1 52      | 1058. RY (4)Sb 47       | 0.06  | 0.98  | 0.007 |  |
| 115. LP (4)C1 52      | 1059. RY (5)Sb 47       | 0.89  | 1.62  | 0.034 |  |
| 115. LP (4)C1 52      | 1060. RY (6)Sb 47       | 0.12  | 1.14  | 0.010 |  |
| 115. LP (4)C1 52      | 1061. RY (7)Sb 47       | 0.89  | 1.58  | 0.033 |  |
| 115. LP (4)C1 52      | 1062. RY (8)Sb 47       | 0.26  | 1.01  | 0.014 |  |
| 115. LP (4)C1 52      | 1064. RY (10)Sb 47      | 0.33  | 2.35  | 0.025 |  |

|                       |                    |       |        |       |
|-----------------------|--------------------|-------|--------|-------|
| 115. LP ( 4)C1 52     | 1065. RY (11)Sb 47 | 1.04  | 2.59   | 0.046 |
| 115. LP ( 4)C1 52     | 1066. RY (12)Sb 47 | 0.57  | 1.66   | 0.027 |
| 115. LP ( 4)C1 52     | 1067. RY (13)Sb 47 | 0.26  | 1.64   | 0.019 |
| 115. LP ( 4)C1 52     | 1070. RY (16)Sb 47 | 1.01  | 4.98   | 0.063 |
| 115. LP ( 4)C1 52     | 1071. RY (17)Sb 47 | 0.39  | 2.08   | 0.025 |
| 115. LP ( 4)C1 52     | 1072. RY (18)Sb 47 | 0.15  | 2.19   | 0.016 |
| 115. LP ( 4)C1 52     | 1073. RY (19)Sb 47 | 0.09  | 2.45   | 0.013 |
| 115. LP ( 4)C1 52     | 1074. RY (20)Sb 47 | 0.07  | 2.25   | 0.011 |
| 115. LP ( 4)C1 52     | 1075. RY (21)Sb 47 | 0.23  | 2.94   | 0.023 |
| 115. LP ( 4)C1 52     | 1076. RY (22)Sb 47 | 0.16  | 10.12  | 0.036 |
| 115. LP ( 4)C1 52     | 1077. RY (23)Sb 47 | 0.09  | 2.04   | 0.012 |
| 115. LP ( 4)C1 52     | 1078. RY (24)Sb 47 | 0.25  | 2.64   | 0.023 |
| 115. LP ( 4)C1 52     | 1079. RY (25)Sb 47 | 0.27  | 2.89   | 0.025 |
| 115. LP ( 4)C1 52     | 1080. RY (26)Sb 47 | 0.52  | 4.32   | 0.042 |
| 115. LP ( 4)C1 52     | 1081. RY (27)Sb 47 | 0.46  | 8.02   | 0.054 |
| 115. LP ( 4)C1 52     | 1083. RY (29)Sb 47 | 1.14  | 33.84  | 0.175 |
| 115. LP ( 4)C1 52     | 1084. RY (30)Sb 47 | 0.08  | 5.35   | 0.018 |
| 115. LP ( 4)C1 52     | 1085. RY (31)Sb 47 | 0.13  | 2.03   | 0.015 |
| 115. LP ( 4)C1 52     | 1087. RY (33)Sb 47 | 0.28  | 8.15   | 0.042 |
| 115. LP ( 4)C1 52     | 1088. RY (34)Sb 47 | 0.43  | 5.84   | 0.045 |
| 115. LP ( 4)C1 52     | 1089. RY (35)Sb 47 | 0.28  | 93.66  | 0.144 |
| 115. LP ( 4)C1 52     | 1090. RY (36)Sb 47 | 0.40  | 36.74  | 0.108 |
| 115. LP ( 4)C1 52     | 1091. RY (37)Sb 47 | 0.64  | 36.87  | 0.137 |
| from unit 7 to unit 4 |                    |       |        |       |
| None above threshold  |                    |       |        |       |
| from unit 7 to unit 5 |                    |       |        |       |
| 115. LP ( 4)C1 52     | 1124. RY ( 5)C1 49 | 0.12  | 2.15   | 0.014 |
| 115. LP ( 4)C1 52     | 1129. RY (10)C1 49 | 0.06  | 2.68   | 0.012 |
| 115. LP ( 4)C1 52     | 1130. RY (11)C1 49 | 0.16  | 4.04   | 0.022 |
| from unit 7 to unit 6 |                    |       |        |       |
| None above threshold  |                    |       |        |       |
| within unit 7         |                    |       |        |       |
| 72. CR ( 1)C1 52      | 1227. RY (24)C1 52 | 0.98  | 115.72 | 0.300 |
| 73. CR ( 2)C1 52      | 1214. RY (11)C1 52 | 2.23  | 18.91  | 0.183 |
| 73. CR ( 2)C1 52      | 1217. RY (14)C1 52 | 0.64  | 18.45  | 0.097 |
| 73. CR ( 2)C1 52      | 1227. RY (24)C1 52 | 5.08  | 28.60  | 0.340 |
| 73. CR ( 2)C1 52      | 1228. RY (25)C1 52 | 0.86  | 18.69  | 0.113 |
| 74. CR ( 3)C1 52      | 1208. RY ( 5)C1 52 | 0.58  | 10.67  | 0.070 |
| 74. CR ( 3)C1 52      | 1213. RY (10)C1 52 | 1.05  | 11.14  | 0.097 |
| 74. CR ( 3)C1 52      | 1214. RY (11)C1 52 | 0.57  | 12.40  | 0.075 |
| 74. CR ( 3)C1 52      | 1216. RY (13)C1 52 | 0.74  | 11.59  | 0.082 |
| 74. CR ( 3)C1 52      | 1218. RY (15)C1 52 | 0.54  | 11.12  | 0.069 |
| 74. CR ( 3)C1 52      | 1222. RY (19)C1 52 | 12.61 | 17.72  | 0.422 |
| 74. CR ( 3)C1 52      | 1223. RY (20)C1 52 | 8.08  | 17.29  | 0.334 |
| 74. CR ( 3)C1 52      | 1224. RY (21)C1 52 | 0.96  | 17.76  | 0.116 |
| 74. CR ( 3)C1 52      | 1227. RY (24)C1 52 | 0.73  | 22.10  | 0.113 |
| 75. CR ( 4)C1 52      | 1204. RY ( 1)C1 52 | 0.80  | 9.25   | 0.077 |
| 75. CR ( 4)C1 52      | 1210. RY ( 7)C1 52 | 1.07  | 10.37  | 0.094 |
| 75. CR ( 4)C1 52      | 1213. RY (10)C1 52 | 0.88  | 11.14  | 0.089 |
| 75. CR ( 4)C1 52      | 1214. RY (11)C1 52 | 0.88  | 12.41  | 0.093 |
| 75. CR ( 4)C1 52      | 1218. RY (15)C1 52 | 1.96  | 11.13  | 0.132 |
| 75. CR ( 4)C1 52      | 1222. RY (19)C1 52 | 3.49  | 17.72  | 0.222 |
| 75. CR ( 4)C1 52      | 1224. RY (21)C1 52 | 15.59 | 17.76  | 0.470 |
| 75. CR ( 4)C1 52      | 1225. RY (22)C1 52 | 2.16  | 11.28  | 0.139 |
| 76. CR ( 5)C1 52      | 1207. RY ( 4)C1 52 | 0.61  | 9.19   | 0.067 |
| 76. CR ( 5)C1 52      | 1209. RY ( 6)C1 52 | 0.63  | 9.53   | 0.069 |
| 76. CR ( 5)C1 52      | 1216. RY (13)C1 52 | 0.51  | 11.59  | 0.069 |
| 76. CR ( 5)C1 52      | 1217. RY (14)C1 52 | 1.61  | 11.95  | 0.124 |
| 76. CR ( 5)C1 52      | 1219. RY (16)C1 52 | 0.59  | 10.44  | 0.070 |
| 76. CR ( 5)C1 52      | 1222. RY (19)C1 52 | 5.37  | 17.72  | 0.275 |
| 76. CR ( 5)C1 52      | 1223. RY (20)C1 52 | 14.30 | 17.29  | 0.444 |
| 76. CR ( 5)C1 52      | 1224. RY (21)C1 52 | 3.40  | 17.76  | 0.219 |
| 112. LP ( 1)C1 52     | 1210. RY ( 7)C1 52 | 6.19  | 2.62   | 0.114 |
| 112. LP ( 1)C1 52     | 1211. RY ( 8)C1 52 | 1.41  | 2.05   | 0.048 |
| 112. LP ( 1)C1 52     | 1213. RY (10)C1 52 | 0.58  | 3.39   | 0.040 |
| 112. LP ( 1)C1 52     | 1214. RY (11)C1 52 | 1.24  | 4.66   | 0.068 |
| 112. LP ( 1)C1 52     | 1217. RY (14)C1 52 | 0.85  | 4.20   | 0.053 |
| 112. LP ( 1)C1 52     | 1221. RY (18)C1 52 | 0.50  | 3.35   | 0.037 |
| 112. LP ( 1)C1 52     | 1224. RY (21)C1 52 | 0.82  | 10.01  | 0.081 |
| 112. LP ( 1)C1 52     | 1227. RY (24)C1 52 | 1.89  | 14.35  | 0.147 |
| 112. LP ( 1)C1 52     | 1228. RY (25)C1 52 | 0.64  | 4.43   | 0.048 |
| 113. LP ( 2)C1 52     | 1206. RY ( 3)C1 52 | 2.31  | 1.03   | 0.044 |
| 113. LP ( 2)C1 52     | 1207. RY ( 4)C1 52 | 2.79  | 1.02   | 0.048 |
| 113. LP ( 2)C1 52     | 1208. RY ( 5)C1 52 | 0.87  | 2.49   | 0.042 |
| 113. LP ( 2)C1 52     | 1209. RY ( 6)C1 52 | 7.18  | 1.35   | 0.088 |
| 113. LP ( 2)C1 52     | 1211. RY ( 8)C1 52 | 2.58  | 1.61   | 0.058 |
| 113. LP ( 2)C1 52     | 1212. RY ( 9)C1 52 | 1.00  | 1.56   | 0.035 |
| 113. LP ( 2)C1 52     | 1216. RY (13)C1 52 | 1.43  | 3.41   | 0.062 |
| 113. LP ( 2)C1 52     | 1217. RY (14)C1 52 | 1.32  | 3.77   | 0.063 |
| 113. LP ( 2)C1 52     | 1219. RY (16)C1 52 | 0.86  | 2.27   | 0.039 |
| 113. LP ( 2)C1 52     | 1223. RY (20)C1 52 | 4.06  | 9.11   | 0.172 |
| 114. LP ( 3)C1 52     | 1205. RY ( 2)C1 52 | 1.96  | 1.75   | 0.052 |
| 114. LP ( 3)C1 52     | 1206. RY ( 3)C1 52 | 1.56  | 1.03   | 0.036 |
| 114. LP ( 3)C1 52     | 1207. RY ( 4)C1 52 | 3.33  | 1.01   | 0.052 |
| 114. LP ( 3)C1 52     | 1208. RY ( 5)C1 52 | 2.53  | 2.49   | 0.071 |
| 114. LP ( 3)C1 52     | 1211. RY ( 8)C1 52 | 2.64  | 1.61   | 0.058 |
| 114. LP ( 3)C1 52     | 1218. RY (15)C1 52 | 2.32  | 2.94   | 0.074 |
| 114. LP ( 3)C1 52     | 1222. RY (19)C1 52 | 3.99  | 9.54   | 0.174 |
| 115. LP ( 4)C1 52     | 1204. RY ( 1)C1 52 | 5.01  | 1.16   | 0.068 |
| 115. LP ( 4)C1 52     | 1205. RY ( 2)C1 52 | 0.85  | 1.84   | 0.035 |
| 115. LP ( 4)C1 52     | 1208. RY ( 5)C1 52 | 0.98  | 2.59   | 0.045 |
| 115. LP ( 4)C1 52     | 1210. RY ( 7)C1 52 | 1.14  | 2.28   | 0.045 |
| 115. LP ( 4)C1 52     | 1213. RY (10)C1 52 | 1.98  | 3.05   | 0.069 |
| 115. LP ( 4)C1 52     | 1214. RY (11)C1 52 | 2.27  | 4.32   | 0.088 |
| 115. LP ( 4)C1 52     | 1224. RY (21)C1 52 | 2.90  | 9.67   | 0.150 |
| 115. LP ( 4)C1 52     | 1225. RY (22)C1 52 | 0.80  | 3.19   | 0.045 |
| from unit 7 to unit 8 |                    |       |        |       |
| None above threshold  |                    |       |        |       |

|                         |                          |       |       |       |  |  |
|-------------------------|--------------------------|-------|-------|-------|--|--|
| from unit 8 to unit 1   |                          |       |       |       |  |  |
| None above threshold    |                          |       |       |       |  |  |
| from unit 8 to unit 2   |                          |       |       |       |  |  |
| 174. BD ( 1) N 53- C 54 | 808. RY ( 1) C 27        | 0.06  | 2.94  | 0.012 |  |  |
| 176. BD ( 3) N 53- C 54 | 808. RY ( 1) C 27        | 0.10  | 2.27  | 0.013 |  |  |
| from unit 8 to unit 3   |                          |       |       |       |  |  |
| None above threshold    |                          |       |       |       |  |  |
| from unit 8 to unit 4   |                          |       |       |       |  |  |
| None above threshold    |                          |       |       |       |  |  |
| from unit 8 to unit 5   |                          |       |       |       |  |  |
| None above threshold    |                          |       |       |       |  |  |
| from unit 8 to unit 6   |                          |       |       |       |  |  |
| None above threshold    |                          |       |       |       |  |  |
| from unit 8 to unit 7   |                          |       |       |       |  |  |
| None above threshold    |                          |       |       |       |  |  |
| within unit 8           |                          |       |       |       |  |  |
| 77. CR ( 1) N 53        | 241. BD* ( 1) N 53- C 54 | 1.81  | 16.83 | 0.156 |  |  |
| 77. CR ( 1) N 53        | 1242. RY (11) N 53       | 7.59  | 25.81 | 0.395 |  |  |
| 77. CR ( 1) N 53        | 1243. RY (12) N 53       | 13.06 | 29.42 | 0.553 |  |  |
| 77. CR ( 1) N 53        | 1244. RY (13) N 53       | 3.80  | 20.85 | 0.251 |  |  |
| 77. CR ( 1) N 53        | 1245. RY (14) N 53       | 2.87  | 20.63 | 0.217 |  |  |
| 77. CR ( 1) N 53        | 1246. RY (15) N 53       | 3.04  | 21.90 | 0.231 |  |  |
| 77. CR ( 1) N 53        | 1247. RY (16) N 53       | 1.23  | 19.56 | 0.138 |  |  |
| 77. CR ( 1) N 53        | 1250. RY (19) N 53       | 0.81  | 20.76 | 0.115 |  |  |
| 77. CR ( 1) N 53        | 1257. RY (26) N 53       | 3.53  | 22.29 | 0.250 |  |  |
| 78. CR ( 1) C 54        | 241. BD* ( 1) N 53- C 54 | 1.11  | 12.41 | 0.105 |  |  |
| 78. CR ( 1) C 54        | 244. BD* ( 1) C 54- C 55 | 1.48  | 11.87 | 0.118 |  |  |
| 78. CR ( 1) C 54        | 1258. RY ( 1) C 54       | 0.51  | 12.70 | 0.071 |  |  |
| 78. CR ( 1) C 54        | 1270. RY (13) C 54       | 1.74  | 15.11 | 0.145 |  |  |
| 78. CR ( 1) C 54        | 1271. RY (14) C 54       | 0.72  | 14.46 | 0.091 |  |  |
| 78. CR ( 1) C 54        | 1272. RY (15) C 54       | 3.36  | 14.86 | 0.199 |  |  |
| 78. CR ( 1) C 54        | 1273. RY (16) C 54       | 1.93  | 14.04 | 0.147 |  |  |
| 78. CR ( 1) C 54        | 1280. RY (23) C 54       | 2.02  | 15.35 | 0.157 |  |  |
| 78. CR ( 1) C 54        | 1281. RY (24) C 54       | 1.11  | 14.98 | 0.115 |  |  |
| 78. CR ( 1) C 54        | 1282. RY (25) C 54       | 19.27 | 25.73 | 0.628 |  |  |
| 79. CR ( 1) C 55        | 244. BD* ( 1) C 54- C 55 | 0.98  | 11.85 | 0.096 |  |  |
| 79. CR ( 1) C 55        | 245. BD* ( 1) C 55- H 56 | 0.67  | 12.05 | 0.080 |  |  |
| 79. CR ( 1) C 55        | 246. BD* ( 1) C 55- H 57 | 0.67  | 12.04 | 0.080 |  |  |
| 79. CR ( 1) C 55        | 247. BD* ( 1) C 55- H 58 | 0.67  | 12.05 | 0.080 |  |  |
| 79. CR ( 1) C 55        | 1264. RY ( 7) C 54       | 0.89  | 13.42 | 0.097 |  |  |
| 79. CR ( 1) C 55        | 1269. RY (12) C 54       | 1.07  | 13.60 | 0.108 |  |  |
| 79. CR ( 1) C 55        | 1287. RY ( 4) C 55       | 0.91  | 12.87 | 0.096 |  |  |
| 79. CR ( 1) C 55        | 1288. RY ( 5) C 55       | 0.93  | 13.82 | 0.101 |  |  |
| 79. CR ( 1) C 55        | 1289. RY ( 6) C 55       | 3.90  | 14.31 | 0.211 |  |  |
| 79. CR ( 1) C 55        | 1290. RY ( 7) C 55       | 6.72  | 14.66 | 0.280 |  |  |
| 79. CR ( 1) C 55        | 1291. RY ( 8) C 55       | 1.19  | 13.94 | 0.115 |  |  |
| 79. CR ( 1) C 55        | 1292. RY ( 9) C 55       | 0.98  | 15.22 | 0.109 |  |  |
| 79. CR ( 1) C 55        | 1296. RY (13) C 55       | 4.28  | 16.74 | 0.239 |  |  |
| 79. CR ( 1) C 55        | 1297. RY (14) C 55       | 0.83  | 13.86 | 0.096 |  |  |
| 79. CR ( 1) C 55        | 1298. RY (15) C 55       | 5.50  | 17.58 | 0.278 |  |  |
| 79. CR ( 1) C 55        | 1300. RY (17) C 55       | 9.32  | 18.16 | 0.367 |  |  |
| 79. CR ( 1) C 55        | 1301. RY (18) C 55       | 2.25  | 14.41 | 0.161 |  |  |
| 79. CR ( 1) C 55        | 1303. RY (20) C 55       | 1.61  | 14.60 | 0.137 |  |  |
| 79. CR ( 1) C 55        | 1315. RY ( 1) H 57       | 0.50  | 12.88 | 0.072 |  |  |
| 116. LP ( 1) N 53       | 241. BD* ( 1) N 53- C 54 | 2.41  | 1.35  | 0.051 |  |  |
| 116. LP ( 1) N 53       | 244. BD* ( 1) C 54- C 55 | 4.90  | 0.82  | 0.056 |  |  |
| 116. LP ( 1) N 53       | 1232. RY ( 1) N 53       | 4.87  | 2.54  | 0.099 |  |  |
| 116. LP ( 1) N 53       | 1233. RY ( 2) N 53       | 2.46  | 1.41  | 0.053 |  |  |
| 116. LP ( 1) N 53       | 1234. RY ( 3) N 53       | 0.51  | 1.43  | 0.024 |  |  |
| 116. LP ( 1) N 53       | 1235. RY ( 4) N 53       | 21.92 | 1.57  | 0.165 |  |  |
| 116. LP ( 1) N 53       | 1238. RY ( 7) N 53       | 1.01  | 3.11  | 0.050 |  |  |
| 116. LP ( 1) N 53       | 1243. RY (12) N 53       | 1.13  | 13.95 | 0.112 |  |  |
| 116. LP ( 1) N 53       | 1244. RY (13) N 53       | 0.82  | 5.38  | 0.059 |  |  |
| 116. LP ( 1) N 53       | 1258. RY ( 1) C 54       | 9.10  | 1.64  | 0.109 |  |  |
| 116. LP ( 1) N 53       | 1262. RY ( 5) C 54       | 0.96  | 3.29  | 0.050 |  |  |
| 116. LP ( 1) N 53       | 1263. RY ( 6) C 54       | 0.52  | 2.45  | 0.032 |  |  |
| 174. BD ( 1) N 53- C 54 | 241. BD* ( 1) N 53- C 54 | 1.31  | 1.92  | 0.045 |  |  |
| 174. BD ( 1) N 53- C 54 | 244. BD* ( 1) C 54- C 55 | 2.76  | 1.39  | 0.055 |  |  |
| 174. BD ( 1) N 53- C 54 | 1235. RY ( 4) N 53       | 0.56  | 2.14  | 0.031 |  |  |
| 174. BD ( 1) N 53- C 54 | 1243. RY (12) N 53       | 1.05  | 14.52 | 0.110 |  |  |
| 174. BD ( 1) N 53- C 54 | 1244. RY (13) N 53       | 0.70  | 5.95  | 0.058 |  |  |
| 174. BD ( 1) N 53- C 54 | 1246. RY (15) N 53       | 0.64  | 7.00  | 0.060 |  |  |
| 174. BD ( 1) N 53- C 54 | 1258. RY ( 1) C 54       | 4.34  | 2.21  | 0.087 |  |  |
| 174. BD ( 1) N 53- C 54 | 1282. RY (25) C 54       | 1.14  | 15.24 | 0.117 |  |  |
| 174. BD ( 1) N 53- C 54 | 1286. RY ( 3) C 55       | 0.90  | 3.63  | 0.051 |  |  |
| 175. BD ( 2) N 53- C 54 | 242. BD* ( 2) N 53- C 54 | 4.37  | 0.44  | 0.039 |  |  |
| 175. BD ( 2) N 53- C 54 | 245. BD* ( 1) C 55- H 56 | 1.34  | 0.92  | 0.031 |  |  |
| 175. BD ( 2) N 53- C 54 | 246. BD* ( 1) C 55- H 57 | 0.60  | 0.91  | 0.021 |  |  |
| 175. BD ( 2) N 53- C 54 | 1233. RY ( 2) N 53       | 4.84  | 1.31  | 0.071 |  |  |
| 175. BD ( 2) N 53- C 54 | 1234. RY ( 3) N 53       | 6.39  | 1.33  | 0.082 |  |  |
| 175. BD ( 2) N 53- C 54 | 1236. RY ( 5) N 53       | 0.95  | 1.96  | 0.039 |  |  |
| 175. BD ( 2) N 53- C 54 | 1260. RY ( 3) C 54       | 2.17  | 1.95  | 0.058 |  |  |
| 175. BD ( 2) N 53- C 54 | 1263. RY ( 6) C 54       | 0.68  | 2.35  | 0.036 |  |  |
| 175. BD ( 2) N 53- C 54 | 1265. RY ( 8) C 54       | 1.55  | 2.69  | 0.058 |  |  |
| 175. BD ( 2) N 53- C 54 | 1266. RY ( 9) C 54       | 1.15  | 2.40  | 0.047 |  |  |
| 176. BD ( 3) N 53- C 54 | 243. BD* ( 3) N 53- C 54 | 4.40  | 0.44  | 0.039 |  |  |
| 176. BD ( 3) N 53- C 54 | 246. BD* ( 1) C 55- H 57 | 0.82  | 0.91  | 0.024 |  |  |
| 176. BD ( 3) N 53- C 54 | 247. BD* ( 1) C 55- H 58 | 1.25  | 0.92  | 0.030 |  |  |
| 176. BD ( 3) N 53- C 54 | 1233. RY ( 2) N 53       | 5.80  | 1.31  | 0.078 |  |  |
| 176. BD ( 3) N 53- C 54 | 1234. RY ( 3) N 53       | 5.95  | 1.33  | 0.079 |  |  |
| 176. BD ( 3) N 53- C 54 | 1235. RY ( 4) N 53       | 1.03  | 1.47  | 0.035 |  |  |
| 176. BD ( 3) N 53- C 54 | 1259. RY ( 2) C 54       | 2.58  | 1.89  | 0.062 |  |  |
| 176. BD ( 3) N 53- C 54 | 1262. RY ( 5) C 54       | 0.80  | 3.20  | 0.045 |  |  |
| 176. BD ( 3) N 53- C 54 | 1263. RY ( 6) C 54       | 1.35  | 2.35  | 0.050 |  |  |
| 176. BD ( 3) N 53- C 54 | 1264. RY ( 7) C 54       | 0.98  | 2.28  | 0.042 |  |  |



|                         |                          |      |       |       |
|-------------------------|--------------------------|------|-------|-------|
| 177. BD ( 1) C 54- C 55 | 241. BD* ( 1) N 53- C 54 | 0.78 | 1.55  | 0.031 |
| 177. BD ( 1) C 54- C 55 | 1232. RY ( 1) N 53       | 3.41 | 2.73  | 0.086 |
| 177. BD ( 1) C 54- C 55 | 1240. RY ( 9) N 53       | 0.54 | 5.29  | 0.048 |
| 177. BD ( 1) C 54- C 55 | 1261. RY ( 4) C 54       | 1.60 | 3.73  | 0.069 |
| 177. BD ( 1) C 54- C 55 | 1272. RY (15) C 54       | 0.77 | 3.99  | 0.049 |
| 177. BD ( 1) C 54- C 55 | 1282. RY (25) C 54       | 1.33 | 14.87 | 0.125 |
| 177. BD ( 1) C 54- C 55 | 1286. RY ( 3) C 55       | 0.96 | 3.26  | 0.050 |
| 177. BD ( 1) C 54- C 55 | 1287. RY ( 4) C 55       | 2.68 | 2.03  | 0.066 |
| 177. BD ( 1) C 54- C 55 | 1298. RY (15) C 55       | 0.54 | 6.75  | 0.054 |
| 178. BD ( 1) C 55- H 56 | 241. BD* ( 1) N 53- C 54 | 2.36 | 1.44  | 0.052 |
| 178. BD ( 1) C 55- H 56 | 242. BD* ( 2) N 53- C 54 | 3.96 | 0.63  | 0.044 |
| 178. BD ( 1) C 55- H 56 | 245. BD* ( 1) C 55- H 56 | 1.48 | 1.10  | 0.036 |
| 178. BD ( 1) C 55- H 56 | 1260. RY ( 3) C 54       | 1.26 | 2.13  | 0.046 |
| 178. BD ( 1) C 55- H 56 | 1285. RY ( 2) C 55       | 2.24 | 1.58  | 0.053 |
| 178. BD ( 1) C 55- H 56 | 1289. RY ( 6) C 55       | 0.79 | 3.36  | 0.046 |
| 178. BD ( 1) C 55- H 56 | 1290. RY ( 7) C 55       | 1.50 | 3.70  | 0.067 |
| 178. BD ( 1) C 55- H 56 | 1291. RY ( 8) C 55       | 0.58 | 2.99  | 0.037 |
| 178. BD ( 1) C 55- H 56 | 1300. RY (17) C 55       | 1.21 | 7.21  | 0.083 |
| 178. BD ( 1) C 55- H 56 | 1310. RY ( 1) H 56       | 2.82 | 2.15  | 0.070 |
| 178. BD ( 1) C 55- H 56 | 1311. RY ( 2) H 56       | 1.03 | 2.22  | 0.043 |
| 178. BD ( 1) C 55- H 56 | 1313. RY ( 4) H 56       | 0.55 | 3.07  | 0.037 |
| 179. BD ( 1) C 55- H 57 | 241. BD* ( 1) N 53- C 54 | 2.26 | 1.44  | 0.051 |
| 179. BD ( 1) C 55- H 57 | 242. BD* ( 2) N 53- C 54 | 1.85 | 0.63  | 0.030 |
| 179. BD ( 1) C 55- H 57 | 243. BD* ( 3) N 53- C 54 | 2.52 | 0.63  | 0.036 |
| 179. BD ( 1) C 55- H 57 | 246. BD* ( 1) C 55- H 57 | 1.61 | 1.09  | 0.037 |
| 179. BD ( 1) C 55- H 57 | 1259. RY ( 2) C 54       | 1.05 | 2.07  | 0.042 |
| 179. BD ( 1) C 55- H 57 | 1284. RY ( 1) C 55       | 1.56 | 1.62  | 0.045 |
| 179. BD ( 1) C 55- H 57 | 1289. RY ( 6) C 55       | 1.12 | 3.37  | 0.055 |
| 179. BD ( 1) C 55- H 57 | 1296. RY (13) C 55       | 0.68 | 5.79  | 0.056 |
| 179. BD ( 1) C 55- H 57 | 1299. RY (16) C 55       | 0.59 | 2.87  | 0.037 |
| 179. BD ( 1) C 55- H 57 | 1300. RY (17) C 55       | 0.63 | 7.21  | 0.060 |
| 179. BD ( 1) C 55- H 57 | 1302. RY (19) C 55       | 0.56 | 2.21  | 0.032 |
| 179. BD ( 1) C 55- H 57 | 1304. RY (21) C 55       | 0.85 | 3.42  | 0.048 |
| 179. BD ( 1) C 55- H 57 | 1315. RY ( 1) H 57       | 2.74 | 1.93  | 0.065 |
| 179. BD ( 1) C 55- H 57 | 1316. RY ( 2) H 57       | 0.58 | 2.64  | 0.035 |
| 179. BD ( 1) C 55- H 57 | 1318. RY ( 4) H 57       | 1.25 | 2.98  | 0.054 |
| 180. BD ( 1) C 55- H 58 | 241. BD* ( 1) N 53- C 54 | 2.39 | 1.44  | 0.052 |
| 180. BD ( 1) C 55- H 58 | 243. BD* ( 3) N 53- C 54 | 3.58 | 0.63  | 0.042 |
| 180. BD ( 1) C 55- H 58 | 247. BD* ( 1) C 55- H 58 | 1.51 | 1.10  | 0.036 |
| 180. BD ( 1) C 55- H 58 | 1259. RY ( 2) C 54       | 0.93 | 2.07  | 0.039 |
| 180. BD ( 1) C 55- H 58 | 1284. RY ( 1) C 55       | 1.41 | 1.61  | 0.043 |
| 180. BD ( 1) C 55- H 58 | 1285. RY ( 2) C 55       | 0.51 | 1.58  | 0.025 |
| 180. BD ( 1) C 55- H 58 | 1289. RY ( 6) C 55       | 0.66 | 3.36  | 0.042 |
| 180. BD ( 1) C 55- H 58 | 1290. RY ( 7) C 55       | 2.26 | 3.70  | 0.082 |
| 180. BD ( 1) C 55- H 58 | 1291. RY ( 8) C 55       | 0.78 | 2.99  | 0.043 |
| 180. BD ( 1) C 55- H 58 | 1301. RY (18) C 55       | 1.50 | 3.46  | 0.064 |
| 180. BD ( 1) C 55- H 58 | 1320. RY ( 1) H 58       | 3.00 | 2.20  | 0.073 |
| 180. BD ( 1) C 55- H 58 | 1321. RY ( 2) H 58       | 0.78 | 2.15  | 0.036 |
| 180. BD ( 1) C 55- H 58 | 1323. RY ( 4) H 58       | 0.57 | 3.11  | 0.038 |

## 2.2 PEPTAS

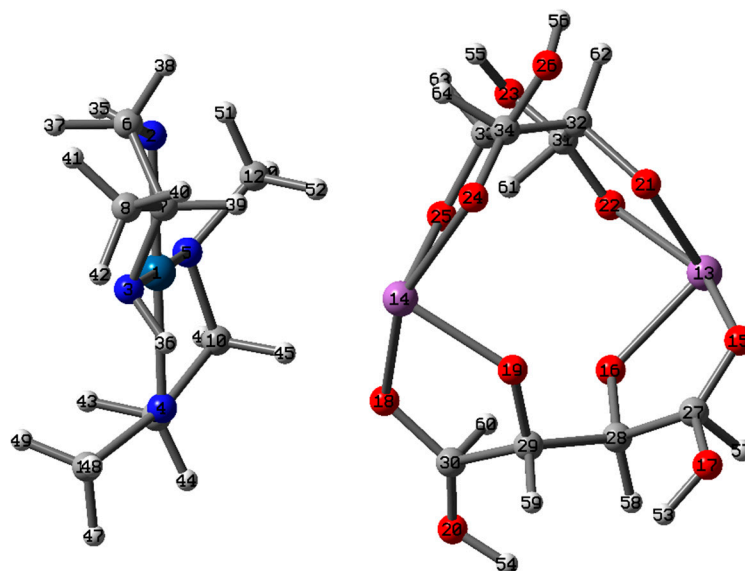

### SECOND ORDER PERTURBATION THEORY ANALYSIS OF FOCK MATRIX IN NBO BASIS

Threshold for printing: 0.50 kcal/mol  
(Intermolecular threshold: 0.05 kcal/mol)

| Donor (L) NBO         | Acceptor (NL) NBO        | E(2)<br>kcal/mol | E(NL)-E(L)<br>a.u. | F(L,NL)<br>a.u. |
|-----------------------|--------------------------|------------------|--------------------|-----------------|
| =====                 |                          |                  |                    |                 |
| from unit 1 to unit 2 |                          |                  |                    |                 |
| 54. LP ( 1)Pt 1       | 191. BD* ( 1)Sb 14- O 25 | 0.06             | 0.57               | 0.005           |
| 54. LP ( 1)Pt 1       | 587. RY (13)Sb 14        | 0.11             | 2.05               | 0.014           |
| 55. LP ( 2)Pt 1       | 190. BD* ( 1)Sb 14- O 19 | 0.08             | 0.45               | 0.005           |
| 55. LP ( 2)Pt 1       | 575. RY ( 1)Sb 14        | 0.55             | 1.80               | 0.028           |
| 55. LP ( 2)Pt 1       | 576. RY ( 2)Sb 14        | 0.06             | 1.98               | 0.010           |
| 55. LP ( 2)Pt 1       | 577. RY ( 3)Sb 14        | 0.32             | 1.85               | 0.022           |

|     |    |        |        |       |     |        |          |      |       |       |
|-----|----|--------|--------|-------|-----|--------|----------|------|-------|-------|
| 55. | LP | ( 2)Pt | 1      | 578.  | RY  | ( 4)Sb | 14       | 0.88 | 1.33  | 0.031 |
| 55. | LP | ( 2)Pt | 1      | 581.  | RY  | ( 7)Sb | 14       | 0.25 | 1.69  | 0.018 |
| 55. | LP | ( 2)Pt | 1      | 585.  | RY  | (11)Sb | 14       | 2.09 | 1.61  | 0.052 |
| 55. | LP | ( 2)Pt | 1      | 586.  | RY  | (12)Sb | 14       | 0.54 | 1.98  | 0.029 |
| 55. | LP | ( 2)Pt | 1      | 587.  | RY  | (13)Sb | 14       | 8.69 | 1.95  | 0.116 |
| 55. | LP | ( 2)Pt | 1      | 588.  | RY  | (14)Sb | 14       | 0.16 | 1.62  | 0.014 |
| 55. | LP | ( 2)Pt | 1      | 589.  | RY  | (15)Sb | 14       | 1.84 | 1.60  | 0.048 |
| 55. | LP | ( 2)Pt | 1      | 590.  | RY  | (16)Sb | 14       | 0.95 | 2.16  | 0.040 |
| 55. | LP | ( 2)Pt | 1      | 591.  | RY  | (17)Sb | 14       | 0.24 | 2.18  | 0.021 |
| 55. | LP | ( 2)Pt | 1      | 592.  | RY  | (18)Sb | 14       | 0.06 | 1.67  | 0.009 |
| 55. | LP | ( 2)Pt | 1      | 594.  | RY  | (20)Sb | 14       | 0.16 | 2.74  | 0.019 |
| 55. | LP | ( 2)Pt | 1      | 595.  | RY  | (21)Sb | 14       | 0.06 | 1.99  | 0.010 |
| 55. | LP | ( 2)Pt | 1      | 596.  | RY  | (22)Sb | 14       | 0.30 | 2.29  | 0.023 |
| 55. | LP | ( 2)Pt | 1      | 597.  | RY  | (23)Sb | 14       | 0.55 | 2.19  | 0.031 |
| 55. | LP | ( 2)Pt | 1      | 598.  | RY  | (24)Sb | 14       | 0.06 | 2.30  | 0.011 |
| 55. | LP | ( 2)Pt | 1      | 599.  | RY  | (25)Sb | 14       | 0.20 | 3.00  | 0.022 |
| 55. | LP | ( 2)Pt | 1      | 601.  | RY  | (27)Sb | 14       | 0.09 | 3.23  | 0.016 |
| 55. | LP | ( 2)Pt | 1      | 602.  | RY  | (28)Sb | 14       | 0.15 | 4.72  | 0.024 |
| 55. | LP | ( 2)Pt | 1      | 603.  | RY  | (29)Sb | 14       | 0.22 | 7.31  | 0.035 |
| 55. | LP | ( 2)Pt | 1      | 604.  | RY  | (30)Sb | 14       | 0.21 | 14.38 | 0.049 |
| 55. | LP | ( 2)Pt | 1      | 691.  | RY  | ( 2) O | 18       | 0.47 | 1.64  | 0.025 |
| 55. | LP | ( 2)Pt | 1      | 692.  | RY  | ( 3) O | 18       | 0.09 | 1.50  | 0.010 |
| 55. | LP | ( 2)Pt | 1      | 694.  | RY  | ( 5) O | 18       | 0.20 | 2.16  | 0.019 |
| 55. | LP | ( 2)Pt | 1      | 697.  | RY  | ( 8) O | 18       | 0.05 | 2.72  | 0.011 |
| 55. | LP | ( 2)Pt | 1      | 698.  | RY  | ( 9) O | 18       | 0.09 | 2.76  | 0.014 |
| 55. | LP | ( 2)Pt | 1      | 718.  | RY  | ( 3) O | 19       | 0.06 | 1.72  | 0.009 |
| 55. | LP | ( 2)Pt | 1      | 719.  | RY  | ( 4) O | 19       | 0.28 | 1.80  | 0.020 |
| 55. | LP | ( 2)Pt | 1      | 721.  | RY  | ( 6) O | 19       | 0.08 | 2.99  | 0.013 |
| 55. | LP | ( 2)Pt | 1      | 743.  | RY  | ( 2) O | 20       | 0.06 | 1.54  | 0.008 |
| 55. | LP | ( 2)Pt | 1      | 847.  | RY  | ( 2) O | 24       | 0.07 | 1.56  | 0.010 |
| 55. | LP | ( 2)Pt | 1      | 848.  | RY  | ( 3) O | 24       | 0.08 | 1.56  | 0.010 |
| 55. | LP | ( 2)Pt | 1      | 850.  | RY  | ( 5) O | 24       | 0.20 | 2.19  | 0.019 |
| 55. | LP | ( 2)Pt | 1      | 874.  | RY  | ( 3) O | 25       | 0.07 | 1.84  | 0.010 |
| 55. | LP | ( 2)Pt | 1      | 979.  | RY  | ( 4) C | 29       | 0.23 | 1.89  | 0.018 |
| 55. | LP | ( 2)Pt | 1      | 982.  | RY  | ( 7) C | 29       | 0.07 | 2.15  | 0.011 |
| 55. | LP | ( 2)Pt | 1      | 985.  | RY  | (10) C | 29       | 0.09 | 4.01  | 0.016 |
| 55. | LP | ( 2)Pt | 1      | 1008. | RY  | ( 7) C | 30       | 0.05 | 2.39  | 0.010 |
| 55. | LP | ( 2)Pt | 1      | 1010. | RY  | ( 9) C | 30       | 0.51 | 2.74  | 0.033 |
| 55. | LP | ( 2)Pt | 1      | 1011. | RY  | (10) C | 30       | 0.06 | 2.26  | 0.010 |
| 55. | LP | ( 2)Pt | 1      | 1012. | RY  | (11) C | 30       | 0.18 | 2.82  | 0.020 |
| 55. | LP | ( 2)Pt | 1      | 1013. | RY  | (12) C | 30       | 0.51 | 2.17  | 0.030 |
| 55. | LP | ( 2)Pt | 1      | 1016. | RY  | (15) C | 30       | 0.06 | 2.99  | 0.012 |
| 55. | LP | ( 2)Pt | 1      | 1017. | RY  | (16) C | 30       | 0.05 | 3.08  | 0.011 |
| 55. | LP | ( 2)Pt | 1      | 1037. | RY  | (10) C | 31       | 0.09 | 2.09  | 0.012 |
| 55. | LP | ( 2)Pt | 1      | 1057. | RY  | ( 4) C | 32       | 0.09 | 1.94  | 0.012 |
| 55. | LP | ( 2)Pt | 1      | 1063. | RY  | (10) C | 32       | 0.05 | 3.81  | 0.013 |
| 55. | LP | ( 2)Pt | 1      | 1070. | RY  | (17) C | 32       | 0.10 | 3.02  | 0.016 |
| 55. | LP | ( 2)Pt | 1      | 1080. | RY  | ( 1) C | 33       | 0.08 | 1.41  | 0.010 |
| 55. | LP | ( 2)Pt | 1      | 1085. | RY  | ( 6) C | 33       | 0.35 | 2.22  | 0.025 |
| 55. | LP | ( 2)Pt | 1      | 1088. | RY  | ( 9) C | 33       | 0.16 | 2.76  | 0.019 |
| 55. | LP | ( 2)Pt | 1      | 1089. | RY  | (10) C | 33       | 0.07 | 2.55  | 0.012 |
| 55. | LP | ( 2)Pt | 1      | 1092. | RY  | (13) C | 33       | 0.07 | 3.72  | 0.015 |
| 55. | LP | ( 2)Pt | 1      | 1108. | RY  | ( 3) C | 34       | 0.12 | 2.17  | 0.015 |
| 55. | LP | ( 2)Pt | 1      | 1109. | RY  | ( 4) C | 34       | 0.08 | 1.63  | 0.010 |
| 55. | LP | ( 2)Pt | 1      | 1113. | RY  | ( 8) C | 34       | 0.39 | 2.55  | 0.028 |
| 55. | LP | ( 2)Pt | 1      | 1115. | RY  | (10) C | 34       | 0.19 | 2.69  | 0.020 |
| 55. | LP | ( 2)Pt | 1      | 1120. | RY  | (15) C | 34       | 0.11 | 2.49  | 0.015 |
| 55. | LP | ( 2)Pt | 1      | 1252. | RY  | ( 1) H | 59       | 0.10 | 1.22  | 0.010 |
| 55. | LP | ( 2)Pt | 1      | 1272. | RY  | ( 1) H | 63       | 0.81 | 1.57  | 0.032 |
| 55. | LP | ( 2)Pt | 1      | 1273. | RY  | ( 2) H | 63       | 0.06 | 2.75  | 0.011 |
| 55. | LP | ( 2)Pt | 1      | 1274. | RY  | ( 3) H | 63       | 0.05 | 2.67  | 0.011 |
| 55. | LP | ( 2)Pt | 1      | 1275. | RY  | ( 4) H | 63       | 0.07 | 2.78  | 0.012 |
| 55. | LP | ( 2)Pt | 1      | 1276. | RY  | ( 5) H | 63       | 0.11 | 3.06  | 0.016 |
| 55. | LP | ( 2)Pt | 1      | 1277. | RY  | ( 1) H | 64       | 0.16 | 1.47  | 0.014 |
| 57. | LP | ( 1) N | 2      | 578.  | RY  | ( 4)Sb | 14       | 0.07 | 1.45  | 0.009 |
| 57. | LP | ( 1) N | 2      | 585.  | RY  | (11)Sb | 14       | 0.15 | 1.74  | 0.014 |
| 57. | LP | ( 1) N | 2      | 587.  | RY  | (13)Sb | 14       | 0.38 | 2.08  | 0.025 |
| 57. | LP | ( 1) N | 2      | 589.  | RY  | (15)Sb | 14       | 0.10 | 1.73  | 0.011 |
| 58. | LP | ( 1) N | 3      | 190.  | BD* | ( 1)Sb | 14- O 19 | 0.06 | 0.58  | 0.005 |
| 58. | LP | ( 1) N | 3      | 578.  | RY  | ( 4)Sb | 14       | 0.09 | 1.45  | 0.010 |
| 58. | LP | ( 1) N | 3      | 585.  | RY  | (11)Sb | 14       | 0.13 | 1.74  | 0.013 |
| 58. | LP | ( 1) N | 3      | 587.  | RY  | (13)Sb | 14       | 0.45 | 2.07  | 0.027 |
| 58. | LP | ( 1) N | 3      | 589.  | RY  | (15)Sb | 14       | 0.06 | 1.72  | 0.009 |
| 59. | LP | ( 1) N | 4      | 585.  | RY  | (11)Sb | 14       | 0.18 | 1.78  | 0.016 |
| 59. | LP | ( 1) N | 4      | 587.  | RY  | (13)Sb | 14       | 0.79 | 2.12  | 0.036 |
| 59. | LP | ( 1) N | 4      | 589.  | RY  | (15)Sb | 14       | 0.18 | 1.77  | 0.016 |
| 59. | LP | ( 1) N | 4      | 590.  | RY  | (16)Sb | 14       | 0.10 | 2.33  | 0.014 |
| 59. | LP | ( 1) N | 4      | 691.  | RY  | ( 2) O | 18       | 0.05 | 1.81  | 0.009 |
| 59. | LP | ( 1) N | 4      | 1010. | RY  | ( 9) C | 30       | 0.06 | 2.90  | 0.012 |
| 59. | LP | ( 1) N | 4      | 1272. | RY  | ( 1) H | 63       | 0.08 | 1.74  | 0.011 |
| 60. | LP | ( 1) N | 5      | 575.  | RY  | ( 1)Sb | 14       | 0.08 | 1.95  | 0.011 |
| 60. | LP | ( 1) N | 5      | 578.  | RY  | ( 4)Sb | 14       | 0.16 | 1.48  | 0.014 |
| 60. | LP | ( 1) N | 5      | 585.  | RY  | (11)Sb | 14       | 0.23 | 1.76  | 0.018 |
| 60. | LP | ( 1) N | 5      | 587.  | RY  | (13)Sb | 14       | 1.07 | 2.10  | 0.042 |
| 60. | LP | ( 1) N | 5      | 589.  | RY  | (15)Sb | 14       | 0.21 | 1.75  | 0.017 |
| 60. | LP | ( 1) N | 5      | 590.  | RY  | (16)Sb | 14       | 0.11 | 2.31  | 0.014 |
| 60. | LP | ( 1) N | 5      | 596.  | RY  | (22)Sb | 14       | 0.06 | 2.44  | 0.011 |
| 60. | LP | ( 1) N | 5      | 597.  | RY  | (23)Sb | 14       | 0.06 | 2.34  | 0.011 |
| 60. | LP | ( 1) N | 5      | 1010. | RY  | ( 9) C | 30       | 0.05 | 2.89  | 0.011 |
| 60. | LP | ( 1) N | 5      | 1013. | RY  | (12) C | 30       | 0.06 | 2.32  | 0.011 |
| 60. | LP | ( 1) N | 5      | 1272. | RY  | ( 1) H | 63       | 0.09 | 1.72  | 0.011 |
| 90. | BD | ( 1)Pt | 1- N 2 | 190.  | BD* | ( 1)Sb | 14- O 19 | 0.19 | 0.50  | 0.009 |
| 90. | BD | ( 1)Pt | 1- N 2 | 575.  | RY  | ( 1)Sb | 14       | 0.07 | 1.84  | 0.010 |
| 90. | BD | ( 1)Pt | 1- N 2 | 576.  | RY  | ( 2)Sb | 14       | 0.07 | 2.02  | 0.010 |
| 90. | BD | ( 1)Pt | 1- N 2 | 578.  | RY  | ( 4)Sb | 14       | 0.22 | 1.37  | 0.016 |
| 90. | BD | ( 1)Pt | 1- N 2 | 585.  | RY  | (11)Sb | 14       | 0.31 | 1.66  | 0.020 |
| 90. | BD | ( 1)Pt | 1- N 2 | 587.  | RY  | (13)Sb | 14       | 1.35 | 1.99  | 0.046 |
| 90. | BD | ( 1)Pt | 1- N 2 | 589.  | RY  | (15)Sb | 14       | 0.31 | 1.64  | 0.020 |
| 90. | BD | ( 1)Pt | 1- N 2 | 590.  | RY  | (16)Sb | 14       | 0.14 | 2.21  | 0.016 |
| 90. | BD | ( 1)Pt | 1- N 2 | 596.  | RY  | (22)Sb | 14       | 0.05 | 2.33  | 0.010 |
| 90. | BD | ( 1)Pt | 1- N 2 | 597.  | RY  | (23)Sb | 14       | 0.09 | 2.23  | 0.013 |
| 90. | BD | ( 1)Pt | 1- N 2 | 719.  | RY  | ( 4) O | 19       | 0.06 | 1.84  | 0.009 |
| 90. | BD | ( 1)Pt | 1- N 2 | 1010. | RY  | ( 9) C | 30       | 0.06 | 2.78  | 0.011 |

|                       |    |                 |          |       |     |                 |      |       |       |
|-----------------------|----|-----------------|----------|-------|-----|-----------------|------|-------|-------|
| 90.                   | BD | ( 1)Pt          | 1- N 2   | 1013. | RY  | (12) C 30       | 0.07 | 2.21  | 0.011 |
| 90.                   | BD | ( 1)Pt          | 1- N 2   | 1085. | RY  | ( 6) C 33       | 0.06 | 2.26  | 0.010 |
| 90.                   | BD | ( 1)Pt          | 1- N 2   | 1272. | RY  | ( 1) H 63       | 0.11 | 1.62  | 0.012 |
| 91.                   | BD | ( 1)Pt          | 1- N 3   | 156.  | LV  | ( 1)Sb 14       | 0.12 | 0.47  | 0.007 |
| 91.                   | BD | ( 1)Pt          | 1- N 3   | 190.  | BD* | ( 1)Sb 14- O 19 | 0.15 | 0.51  | 0.008 |
| 91.                   | BD | ( 1)Pt          | 1- N 3   | 575.  | RY  | ( 1)Sb 14       | 0.15 | 1.86  | 0.015 |
| 91.                   | BD | ( 1)Pt          | 1- N 3   | 578.  | RY  | ( 4)Sb 14       | 0.31 | 1.39  | 0.018 |
| 91.                   | BD | ( 1)Pt          | 1- N 3   | 585.  | RY  | (11)Sb 14       | 0.35 | 1.67  | 0.021 |
| 91.                   | BD | ( 1)Pt          | 1- N 3   | 587.  | RY  | (13)Sb 14       | 1.29 | 2.01  | 0.045 |
| 91.                   | BD | ( 1)Pt          | 1- N 3   | 589.  | RY  | (15)Sb 14       | 0.30 | 1.66  | 0.020 |
| 91.                   | BD | ( 1)Pt          | 1- N 3   | 590.  | RY  | (16)Sb 14       | 0.12 | 2.22  | 0.014 |
| 91.                   | BD | ( 1)Pt          | 1- N 3   | 596.  | RY  | (22)Sb 14       | 0.07 | 2.35  | 0.011 |
| 91.                   | BD | ( 1)Pt          | 1- N 3   | 597.  | RY  | (23)Sb 14       | 0.12 | 2.25  | 0.015 |
| 91.                   | BD | ( 1)Pt          | 1- N 3   | 691.  | RY  | ( 2) O 18       | 0.06 | 1.70  | 0.009 |
| 91.                   | BD | ( 1)Pt          | 1- N 3   | 719.  | RY  | ( 4) O 19       | 0.06 | 1.86  | 0.009 |
| 91.                   | BD | ( 1)Pt          | 1- N 3   | 1010. | RY  | ( 9) C 30       | 0.07 | 2.80  | 0.012 |
| 91.                   | BD | ( 1)Pt          | 1- N 3   | 1013. | RY  | (12) C 30       | 0.07 | 2.23  | 0.011 |
| 91.                   | BD | ( 1)Pt          | 1- N 3   | 1113. | RY  | ( 8) C 34       | 0.06 | 2.61  | 0.011 |
| 91.                   | BD | ( 1)Pt          | 1- N 3   | 1272. | RY  | ( 1) H 63       | 0.11 | 1.63  | 0.012 |
| 92.                   | BD | ( 1)Pt          | 1- N 4   | 587.  | RY  | (13)Sb 14       | 0.10 | 2.05  | 0.013 |
| 93.                   | BD | ( 1) N          | 2- C 6   | 587.  | RY  | (13)Sb 14       | 0.05 | 2.27  | 0.010 |
| 94.                   | BD | ( 1) N          | 2- H 35  | 587.  | RY  | (13)Sb 14       | 0.13 | 2.24  | 0.015 |
| 94.                   | BD | ( 1) N          | 2- H 35  | 589.  | RY  | (15)Sb 14       | 0.06 | 1.88  | 0.009 |
| 96.                   | BD | ( 1) N          | 3- H 36  | 585.  | RY  | (11)Sb 14       | 0.08 | 1.90  | 0.011 |
| 96.                   | BD | ( 1) N          | 3- H 36  | 587.  | RY  | (13)Sb 14       | 0.14 | 2.23  | 0.016 |
| 98.                   | BD | ( 1) N          | 4- C 11  | 585.  | RY  | (11)Sb 14       | 0.06 | 1.94  | 0.010 |
| 98.                   | BD | ( 1) N          | 4- C 11  | 587.  | RY  | (13)Sb 14       | 0.17 | 2.28  | 0.017 |
| 98.                   | BD | ( 1) N          | 4- C 11  | 589.  | RY  | (15)Sb 14       | 0.07 | 1.93  | 0.010 |
| 99.                   | BD | ( 1) N          | 5- C 10  | 587.  | RY  | (13)Sb 14       | 0.05 | 2.32  | 0.010 |
| 100.                  | BD | ( 1) N          | 5- C 12  | 587.  | RY  | (13)Sb 14       | 0.17 | 2.30  | 0.018 |
| 102.                  | BD | ( 1) C          | 6- H 37  | 587.  | RY  | (13)Sb 14       | 0.06 | 2.10  | 0.010 |
| 105.                  | BD | ( 1) C          | 7- H 39  | 587.  | RY  | (13)Sb 14       | 0.06 | 2.09  | 0.010 |
| 109.                  | BD | ( 1) C          | 9- C 10  | 587.  | RY  | (13)Sb 14       | 0.08 | 2.19  | 0.012 |
| 110.                  | BD | ( 1) C          | 9- H 43  | 587.  | RY  | (13)Sb 14       | 0.09 | 2.10  | 0.012 |
| 112.                  | BD | ( 1) C          | 10- H 45 | 587.  | RY  | (13)Sb 14       | 0.07 | 2.09  | 0.011 |
| 116.                  | BD | ( 1) C          | 11- H 49 | 587.  | RY  | (13)Sb 14       | 0.06 | 2.10  | 0.010 |
| from unit 2 to unit 1 |    |                 |          |       |     |                 |      |       |       |
| 29.                   | CR | ( 5)Sb 14       |          | 228.  | RY  | ( 7)Pt 1        | 0.05 | 4.52  | 0.014 |
| 32.                   | CR | ( 8)Sb 14       |          | 1152. | RY  | ( 1) H 39       | 0.05 | 2.96  | 0.011 |
| 62.                   | LP | ( 1)Sb 14       |          | 157.  | BD* | ( 1)Pt 1- N 2   | 0.54 | 0.40  | 0.013 |
| 62.                   | LP | ( 1)Sb 14       |          | 158.  | BD* | ( 1)Pt 1- N 3   | 0.41 | 0.42  | 0.012 |
| 62.                   | LP | ( 1)Sb 14       |          | 159.  | BD* | ( 1)Pt 1- N 4   | 0.13 | 0.13  | 0.004 |
| 62.                   | LP | ( 1)Sb 14       |          | 172.  | BD* | ( 1) C 7- H 39  | 0.20 | 0.79  | 0.011 |
| 62.                   | LP | ( 1)Sb 14       |          | 232.  | RY  | (11)Pt 1        | 0.08 | 1.85  | 0.011 |
| 62.                   | LP | ( 1)Sb 14       |          | 235.  | RY  | (14)Pt 1        | 0.11 | 3.07  | 0.016 |
| 62.                   | LP | ( 1)Sb 14       |          | 236.  | RY  | (15)Pt 1        | 0.10 | 6.02  | 0.022 |
| 62.                   | LP | ( 1)Sb 14       |          | 237.  | RY  | (16)Pt 1        | 0.14 | 8.95  | 0.032 |
| 62.                   | LP | ( 1)Sb 14       |          | 243.  | RY  | (22)Pt 1        | 0.15 | 20.57 | 0.049 |
| 62.                   | LP | ( 1)Sb 14       |          | 244.  | RY  | (23)Pt 1        | 0.11 | 22.84 | 0.045 |
| 62.                   | LP | ( 1)Sb 14       |          | 245.  | RY  | (24)Pt 1        | 0.07 | 4.65  | 0.016 |
| 62.                   | LP | ( 1)Sb 14       |          | 250.  | RY  | (29)Pt 1        | 0.09 | 6.45  | 0.022 |
| 62.                   | LP | ( 1)Sb 14       |          | 252.  | RY  | ( 1) N 2        | 0.17 | 2.82  | 0.019 |
| 62.                   | LP | ( 1)Sb 14       |          | 253.  | RY  | ( 2) N 2        | 0.23 | 4.89  | 0.030 |
| 62.                   | LP | ( 1)Sb 14       |          | 254.  | RY  | ( 3) N 2        | 0.06 | 1.67  | 0.009 |
| 62.                   | LP | ( 1)Sb 14       |          | 256.  | RY  | ( 5) N 2        | 0.07 | 2.03  | 0.011 |
| 62.                   | LP | ( 1)Sb 14       |          | 264.  | RY  | (13) N 2        | 0.08 | 4.25  | 0.017 |
| 62.                   | LP | ( 1)Sb 14       |          | 278.  | RY  | ( 1) N 3        | 0.24 | 3.77  | 0.027 |
| 62.                   | LP | ( 1)Sb 14       |          | 279.  | RY  | ( 2) N 3        | 0.14 | 4.13  | 0.022 |
| 62.                   | LP | ( 1)Sb 14       |          | 281.  | RY  | ( 4) N 3        | 0.06 | 2.46  | 0.011 |
| 62.                   | LP | ( 1)Sb 14       |          | 283.  | RY  | ( 6) N 3        | 0.06 | 2.41  | 0.010 |
| 62.                   | LP | ( 1)Sb 14       |          | 304.  | RY  | ( 1) N 4        | 0.15 | 2.65  | 0.018 |
| 62.                   | LP | ( 1)Sb 14       |          | 305.  | RY  | ( 2) N 4        | 0.21 | 4.12  | 0.026 |
| 62.                   | LP | ( 1)Sb 14       |          | 330.  | RY  | ( 1) N 5        | 0.16 | 2.14  | 0.016 |
| 62.                   | LP | ( 1)Sb 14       |          | 331.  | RY  | ( 2) N 5        | 0.22 | 4.49  | 0.028 |
| 62.                   | LP | ( 1)Sb 14       |          | 343.  | RY  | (14) N 5        | 0.05 | 4.37  | 0.013 |
| 62.                   | LP | ( 1)Sb 14       |          | 1132. | RY  | ( 1) H 35       | 0.05 | 1.78  | 0.009 |
| 62.                   | LP | ( 1)Sb 14       |          | 1137. | RY  | ( 1) H 36       | 0.07 | 1.67  | 0.009 |
| 62.                   | LP | ( 1)Sb 14       |          | 1138. | RY  | ( 2) H 36       | 0.05 | 2.52  | 0.010 |
| 62.                   | LP | ( 1)Sb 14       |          | 1152. | RY  | ( 1) H 39       | 0.14 | 1.50  | 0.013 |
| 62.                   | LP | ( 1)Sb 14       |          | 1153. | RY  | ( 2) H 39       | 0.05 | 2.88  | 0.011 |
| 70.                   | LP | ( 1) O 18       |          | 304.  | RY  | ( 1) N 4        | 0.10 | 3.04  | 0.016 |
| 70.                   | LP | ( 1) O 18       |          | 1182. | RY  | ( 1) H 45       | 0.35 | 1.91  | 0.023 |
| 71.                   | LP | ( 2) O 18       |          | 304.  | RY  | ( 1) N 4        | 0.15 | 2.77  | 0.018 |
| 71.                   | LP | ( 2) O 18       |          | 306.  | RY  | ( 3) N 4        | 0.06 | 1.58  | 0.009 |
| 72.                   | LP | ( 3) O 18       |          | 304.  | RY  | ( 1) N 4        | 0.11 | 2.81  | 0.015 |
| 72.                   | LP | ( 3) O 18       |          | 1182. | RY  | ( 1) H 45       | 0.19 | 1.67  | 0.016 |
| 86.                   | LP | ( 1) O 25       |          | 1217. | RY  | ( 1) H 52       | 0.22 | 2.04  | 0.019 |
| 87.                   | LP | ( 2) O 25       |          | 1217. | RY  | ( 1) H 52       | 0.68 | 1.78  | 0.031 |
| 123.                  | BD | ( 1)Sb 14- O 19 |          | 157.  | BD* | ( 1)Pt 1- N 2   | 0.09 | 0.72  | 0.007 |
| 123.                  | BD | ( 1)Sb 14- O 19 |          | 158.  | BD* | ( 1)Pt 1- N 3   | 0.08 | 0.74  | 0.007 |
| 123.                  | BD | ( 1)Sb 14- O 19 |          | 228.  | RY  | ( 7)Pt 1        | 0.06 | 3.37  | 0.012 |
| 123.                  | BD | ( 1)Sb 14- O 19 |          | 231.  | RY  | (10)Pt 1        | 0.08 | 2.39  | 0.012 |
| 123.                  | BD | ( 1)Sb 14- O 19 |          | 243.  | RY  | (22)Pt 1        | 0.06 | 20.89 | 0.032 |
| 123.                  | BD | ( 1)Sb 14- O 19 |          | 244.  | RY  | (23)Pt 1        | 0.05 | 23.16 | 0.031 |
| 123.                  | BD | ( 1)Sb 14- O 19 |          | 253.  | RY  | ( 2) N 2        | 0.07 | 5.21  | 0.017 |
| 123.                  | BD | ( 1)Sb 14- O 19 |          | 278.  | RY  | ( 1) N 3        | 0.08 | 4.09  | 0.016 |
| 123.                  | BD | ( 1)Sb 14- O 19 |          | 279.  | RY  | ( 2) N 3        | 0.06 | 4.45  | 0.014 |
| 123.                  | BD | ( 1)Sb 14- O 19 |          | 305.  | RY  | ( 2) N 4        | 0.07 | 4.44  | 0.016 |
| 123.                  | BD | ( 1)Sb 14- O 19 |          | 330.  | RY  | ( 1) N 5        | 0.06 | 2.46  | 0.011 |
| 123.                  | BD | ( 1)Sb 14- O 19 |          | 331.  | RY  | ( 2) N 5        | 0.07 | 4.81  | 0.016 |
| 124.                  | BD | ( 1)Sb 14- O 25 |          | 228.  | RY  | ( 7)Pt 1        | 0.05 | 3.39  | 0.012 |
| 129.                  | BD | ( 1) O 18- C 30 |          | 222.  | RY  | ( 1)Pt 1        | 0.14 | 3.14  | 0.019 |
| 129.                  | BD | ( 1) O 18- C 30 |          | 304.  | RY  | ( 1) N 4        | 0.25 | 3.25  | 0.025 |
| 129.                  | BD | ( 1) O 18- C 30 |          | 306.  | RY  | ( 3) N 4        | 0.06 | 2.06  | 0.010 |
| 129.                  | BD | ( 1) O 18- C 30 |          | 1182. | RY  | ( 1) H 45       | 0.27 | 2.12  | 0.021 |
| 138.                  | BD | ( 1) O 25- C 33 |          | 1217. | RY  | ( 1) H 52       | 0.13 | 2.23  | 0.015 |
| within unit 2         |    |                 |          |       |     |                 |      |       |       |
| 16.                   | CR | ( 1)Sb 13       |          | 573.  | RY  | (36)Sb 13       | 0.61 | 12.73 | 0.079 |
| 17.                   | CR | ( 2)Sb 13       |          | 187.  | BD* | ( 1)Sb 13- O 16 | 0.92 | 4.74  | 0.059 |
| 17.                   | CR | ( 2)Sb 13       |          | 189.  | BD* | ( 1)Sb 13- O 22 | 2.17 | 4.73  | 0.090 |
| 17.                   | CR | ( 2)Sb 13       |          | 541.  | RY  | ( 4)Sb 13       | 1.49 | 5.68  | 0.082 |

|                  |                          |      |       |       |
|------------------|--------------------------|------|-------|-------|
| 17. CR ( 2)Sb 13 | 543. RY ( 6)Sb 13        | 1.36 | 5.84  | 0.079 |
| 17. CR ( 2)Sb 13 | 551. RY (14)Sb 13        | 0.52 | 5.95  | 0.050 |
| 18. CR ( 3)Sb 13 | 188. BD* ( 1)Sb 13- O 21 | 2.53 | 4.74  | 0.098 |
| 18. CR ( 3)Sb 13 | 545. RY ( 8)Sb 13        | 0.60 | 5.94  | 0.053 |
| 18. CR ( 3)Sb 13 | 546. RY ( 9)Sb 13        | 0.87 | 6.02  | 0.064 |
| 18. CR ( 3)Sb 13 | 551. RY (14)Sb 13        | 0.58 | 5.95  | 0.052 |
| 19. CR ( 4)Sb 13 | 187. BD* ( 1)Sb 13- O 16 | 1.86 | 4.74  | 0.084 |
| 19. CR ( 4)Sb 13 | 189. BD* ( 1)Sb 13- O 22 | 1.23 | 4.73  | 0.068 |
| 19. CR ( 4)Sb 13 | 544. RY ( 7)Sb 13        | 0.76 | 5.90  | 0.060 |
| 19. CR ( 4)Sb 13 | 547. RY (10)Sb 13        | 0.51 | 5.81  | 0.049 |
| 20. CR ( 5)Sb 13 | 539. RY ( 2)Sb 13        | 1.14 | 3.20  | 0.054 |
| 20. CR ( 5)Sb 13 | 540. RY ( 3)Sb 13        | 0.99 | 3.23  | 0.051 |
| 20. CR ( 5)Sb 13 | 541. RY ( 4)Sb 13        | 2.90 | 2.88  | 0.082 |
| 20. CR ( 5)Sb 13 | 542. RY ( 5)Sb 13        | 6.15 | 3.00  | 0.121 |
| 20. CR ( 5)Sb 13 | 546. RY ( 9)Sb 13        | 0.74 | 3.22  | 0.044 |
| 20. CR ( 5)Sb 13 | 548. RY (11)Sb 13        | 1.76 | 2.90  | 0.064 |
| 20. CR ( 5)Sb 13 | 551. RY (14)Sb 13        | 1.69 | 3.15  | 0.065 |
| 20. CR ( 5)Sb 13 | 552. RY (15)Sb 13        | 0.76 | 3.85  | 0.048 |
| 20. CR ( 5)Sb 13 | 554. RY (17)Sb 13        | 1.37 | 3.16  | 0.059 |
| 20. CR ( 5)Sb 13 | 556. RY (19)Sb 13        | 2.27 | 3.34  | 0.078 |
| 20. CR ( 5)Sb 13 | 561. RY (24)Sb 13        | 1.08 | 3.91  | 0.058 |
| 20. CR ( 5)Sb 13 | 769. RY ( 2) O 21        | 0.98 | 2.99  | 0.048 |
| 21. CR ( 6)Sb 13 | 538. RY ( 1)Sb 13        | 4.81 | 3.16  | 0.110 |
| 21. CR ( 6)Sb 13 | 539. RY ( 2)Sb 13        | 2.19 | 3.20  | 0.075 |
| 21. CR ( 6)Sb 13 | 540. RY ( 3)Sb 13        | 3.44 | 3.24  | 0.094 |
| 21. CR ( 6)Sb 13 | 545. RY ( 8)Sb 13        | 0.89 | 3.15  | 0.047 |
| 21. CR ( 6)Sb 13 | 551. RY (14)Sb 13        | 2.50 | 3.16  | 0.079 |
| 21. CR ( 6)Sb 13 | 553. RY (16)Sb 13        | 0.93 | 3.08  | 0.048 |
| 21. CR ( 6)Sb 13 | 563. RY (26)Sb 13        | 0.71 | 4.37  | 0.050 |
| 21. CR ( 6)Sb 13 | 564. RY (27)Sb 13        | 0.55 | 4.67  | 0.045 |
| 21. CR ( 6)Sb 13 | 613. RY ( 2) O 15        | 1.73 | 3.06  | 0.065 |
| 21. CR ( 6)Sb 13 | 638. RY ( 1) O 16        | 1.02 | 3.07  | 0.050 |
| 21. CR ( 6)Sb 13 | 639. RY ( 2) O 16        | 1.22 | 2.94  | 0.053 |
| 21. CR ( 6)Sb 13 | 640. RY ( 3) O 16        | 0.59 | 3.14  | 0.038 |
| 21. CR ( 6)Sb 13 | 795. RY ( 2) O 22        | 0.90 | 3.04  | 0.047 |
| 22. CR ( 7)Sb 13 | 539. RY ( 2)Sb 13        | 7.13 | 3.20  | 0.135 |
| 22. CR ( 7)Sb 13 | 540. RY ( 3)Sb 13        | 0.56 | 3.23  | 0.038 |
| 22. CR ( 7)Sb 13 | 546. RY ( 9)Sb 13        | 2.07 | 3.22  | 0.073 |
| 22. CR ( 7)Sb 13 | 549. RY (12)Sb 13        | 0.63 | 3.11  | 0.039 |
| 22. CR ( 7)Sb 13 | 552. RY (15)Sb 13        | 1.02 | 3.84  | 0.056 |
| 22. CR ( 7)Sb 13 | 553. RY (16)Sb 13        | 2.59 | 3.07  | 0.080 |
| 22. CR ( 7)Sb 13 | 554. RY (17)Sb 13        | 1.27 | 3.16  | 0.057 |
| 22. CR ( 7)Sb 13 | 557. RY (20)Sb 13        | 2.55 | 3.48  | 0.084 |
| 22. CR ( 7)Sb 13 | 558. RY (21)Sb 13        | 0.63 | 3.91  | 0.044 |
| 22. CR ( 7)Sb 13 | 560. RY (23)Sb 13        | 1.26 | 3.91  | 0.063 |
| 23. CR ( 8)Sb 13 | 538. RY ( 1)Sb 13        | 1.54 | 3.16  | 0.062 |
| 23. CR ( 8)Sb 13 | 541. RY ( 4)Sb 13        | 1.69 | 2.88  | 0.062 |
| 23. CR ( 8)Sb 13 | 542. RY ( 5)Sb 13        | 2.23 | 3.00  | 0.073 |
| 23. CR ( 8)Sb 13 | 543. RY ( 6)Sb 13        | 1.11 | 3.04  | 0.052 |
| 23. CR ( 8)Sb 13 | 544. RY ( 7)Sb 13        | 1.10 | 3.11  | 0.052 |
| 23. CR ( 8)Sb 13 | 546. RY ( 9)Sb 13        | 1.76 | 3.22  | 0.067 |
| 23. CR ( 8)Sb 13 | 550. RY (13)Sb 13        | 3.05 | 3.08  | 0.087 |
| 23. CR ( 8)Sb 13 | 551. RY (14)Sb 13        | 0.54 | 3.15  | 0.037 |
| 23. CR ( 8)Sb 13 | 552. RY (15)Sb 13        | 0.79 | 3.85  | 0.049 |
| 23. CR ( 8)Sb 13 | 555. RY (18)Sb 13        | 0.57 | 3.81  | 0.041 |
| 23. CR ( 8)Sb 13 | 557. RY (20)Sb 13        | 0.57 | 3.49  | 0.040 |
| 23. CR ( 8)Sb 13 | 561. RY (24)Sb 13        | 0.78 | 3.91  | 0.049 |
| 23. CR ( 8)Sb 13 | 564. RY (27)Sb 13        | 1.46 | 4.67  | 0.074 |
| 23. CR ( 8)Sb 13 | 565. RY (28)Sb 13        | 0.80 | 5.51  | 0.059 |
| 23. CR ( 8)Sb 13 | 639. RY ( 2) O 16        | 0.51 | 2.94  | 0.034 |
| 23. CR ( 8)Sb 13 | 768. RY ( 1) O 21        | 1.10 | 3.09  | 0.052 |
| 23. CR ( 8)Sb 13 | 769. RY ( 2) O 21        | 0.58 | 2.99  | 0.037 |
| 23. CR ( 8)Sb 13 | 795. RY ( 2) O 22        | 0.58 | 3.04  | 0.037 |
| 24. CR ( 9)Sb 13 | 538. RY ( 1)Sb 13        | 2.77 | 3.16  | 0.083 |
| 24. CR ( 9)Sb 13 | 540. RY ( 3)Sb 13        | 1.40 | 3.23  | 0.060 |
| 24. CR ( 9)Sb 13 | 542. RY ( 5)Sb 13        | 1.83 | 3.00  | 0.066 |
| 24. CR ( 9)Sb 13 | 546. RY ( 9)Sb 13        | 1.85 | 3.22  | 0.069 |
| 24. CR ( 9)Sb 13 | 547. RY (10)Sb 13        | 1.53 | 3.01  | 0.061 |
| 24. CR ( 9)Sb 13 | 550. RY (13)Sb 13        | 1.47 | 3.08  | 0.060 |
| 24. CR ( 9)Sb 13 | 551. RY (14)Sb 13        | 0.57 | 3.15  | 0.038 |
| 24. CR ( 9)Sb 13 | 553. RY (16)Sb 13        | 1.09 | 3.08  | 0.052 |
| 24. CR ( 9)Sb 13 | 554. RY (17)Sb 13        | 1.07 | 3.16  | 0.052 |
| 24. CR ( 9)Sb 13 | 556. RY (19)Sb 13        | 2.07 | 3.34  | 0.074 |
| 24. CR ( 9)Sb 13 | 560. RY (23)Sb 13        | 0.69 | 3.91  | 0.046 |
| 24. CR ( 9)Sb 13 | 561. RY (24)Sb 13        | 0.87 | 3.91  | 0.052 |
| 24. CR ( 9)Sb 13 | 562. RY (25)Sb 13        | 0.84 | 4.14  | 0.053 |
| 24. CR ( 9)Sb 13 | 564. RY (27)Sb 13        | 1.09 | 4.67  | 0.064 |
| 24. CR ( 9)Sb 13 | 640. RY ( 3) O 16        | 0.64 | 3.14  | 0.040 |
| 25. CR ( 1)Sb 14 | 611. RY (37)Sb 14        | 0.65 | 22.14 | 0.107 |
| 26. CR ( 2)Sb 14 | 156. LV ( 1)Sb 14        | 2.92 | 4.70  | 0.105 |
| 26. CR ( 2)Sb 14 | 190. BD* ( 1)Sb 14- O 19 | 0.89 | 4.74  | 0.058 |
| 26. CR ( 2)Sb 14 | 578. RY ( 4)Sb 14        | 2.06 | 5.62  | 0.096 |
| 27. CR ( 3)Sb 14 | 156. LV ( 1)Sb 14        | 1.03 | 4.69  | 0.062 |
| 27. CR ( 3)Sb 14 | 190. BD* ( 1)Sb 14- O 19 | 1.76 | 4.74  | 0.081 |
| 27. CR ( 3)Sb 14 | 576. RY ( 2)Sb 14        | 0.52 | 6.26  | 0.051 |
| 27. CR ( 3)Sb 14 | 582. RY ( 8)Sb 14        | 1.06 | 5.81  | 0.070 |
| 27. CR ( 3)Sb 14 | 589. RY (15)Sb 14        | 0.78 | 5.89  | 0.061 |
| 28. CR ( 4)Sb 14 | 191. BD* ( 1)Sb 14- O 25 | 2.58 | 4.75  | 0.099 |
| 28. CR ( 4)Sb 14 | 577. RY ( 3)Sb 14        | 0.74 | 6.13  | 0.060 |
| 28. CR ( 4)Sb 14 | 584. RY (10)Sb 14        | 0.99 | 5.98  | 0.069 |
| 28. CR ( 4)Sb 14 | 595. RY (21)Sb 14        | 0.53 | 6.28  | 0.051 |
| 29. CR ( 5)Sb 14 | 576. RY ( 2)Sb 14        | 3.15 | 3.47  | 0.093 |
| 29. CR ( 5)Sb 14 | 577. RY ( 3)Sb 14        | 1.71 | 3.34  | 0.067 |
| 29. CR ( 5)Sb 14 | 578. RY ( 4)Sb 14        | 2.28 | 2.82  | 0.072 |
| 29. CR ( 5)Sb 14 | 579. RY ( 5)Sb 14        | 0.68 | 3.18  | 0.041 |
| 29. CR ( 5)Sb 14 | 580. RY ( 6)Sb 14        | 1.10 | 3.15  | 0.053 |
| 29. CR ( 5)Sb 14 | 581. RY ( 7)Sb 14        | 0.89 | 3.18  | 0.048 |
| 29. CR ( 5)Sb 14 | 586. RY (12)Sb 14        | 1.04 | 3.47  | 0.054 |
| 29. CR ( 5)Sb 14 | 587. RY (13)Sb 14        | 1.27 | 3.44  | 0.059 |
| 29. CR ( 5)Sb 14 | 589. RY (15)Sb 14        | 2.25 | 3.09  | 0.074 |
| 29. CR ( 5)Sb 14 | 590. RY (16)Sb 14        | 0.65 | 3.66  | 0.043 |
| 29. CR ( 5)Sb 14 | 591. RY (17)Sb 14        | 0.69 | 3.68  | 0.045 |
| 29. CR ( 5)Sb 14 | 594. RY (20)Sb 14        | 0.71 | 4.23  | 0.049 |

|                  |                          |       |       |       |
|------------------|--------------------------|-------|-------|-------|
| 29. CR ( 5)Sb 14 | 596. RY (22)Sb 14        | 0.54  | 3.78  | 0.040 |
| 29. CR ( 5)Sb 14 | 597. RY (23)Sb 14        | 1.25  | 3.68  | 0.061 |
| 29. CR ( 5)Sb 14 | 691. RY ( 2) O 18        | 1.74  | 3.13  | 0.066 |
| 29. CR ( 5)Sb 14 | 716. RY ( 1) O 19        | 1.25  | 3.12  | 0.056 |
| 29. CR ( 5)Sb 14 | 717. RY ( 2) O 19        | 1.29  | 3.07  | 0.056 |
| 29. CR ( 5)Sb 14 | 718. RY ( 3) O 19        | 0.65  | 3.22  | 0.041 |
| 30. CR ( 6)Sb 14 | 575. RY ( 1)Sb 14        | 1.95  | 3.29  | 0.071 |
| 30. CR ( 6)Sb 14 | 576. RY ( 2)Sb 14        | 2.27  | 3.47  | 0.079 |
| 30. CR ( 6)Sb 14 | 578. RY ( 4)Sb 14        | 1.03  | 2.82  | 0.048 |
| 30. CR ( 6)Sb 14 | 579. RY ( 5)Sb 14        | 4.01  | 3.17  | 0.101 |
| 30. CR ( 6)Sb 14 | 580. RY ( 6)Sb 14        | 3.12  | 3.15  | 0.088 |
| 30. CR ( 6)Sb 14 | 584. RY (10)Sb 14        | 2.03  | 3.18  | 0.072 |
| 30. CR ( 6)Sb 14 | 591. RY (17)Sb 14        | 1.00  | 3.68  | 0.054 |
| 30. CR ( 6)Sb 14 | 594. RY (20)Sb 14        | 2.15  | 4.23  | 0.085 |
| 30. CR ( 6)Sb 14 | 598. RY (24)Sb 14        | 0.76  | 3.79  | 0.048 |
| 30. CR ( 6)Sb 14 | 601. RY (27)Sb 14        | 0.53  | 4.72  | 0.045 |
| 30. CR ( 6)Sb 14 | 847. RY ( 2) O 24        | 1.15  | 3.06  | 0.053 |
| 30. CR ( 6)Sb 14 | 873. RY ( 2) O 25        | 1.01  | 3.03  | 0.049 |
| 31. CR ( 7)Sb 14 | 575. RY ( 1)Sb 14        | 4.78  | 3.28  | 0.112 |
| 31. CR ( 7)Sb 14 | 577. RY ( 3)Sb 14        | 1.88  | 3.34  | 0.071 |
| 31. CR ( 7)Sb 14 | 580. RY ( 6)Sb 14        | 0.53  | 3.14  | 0.036 |
| 31. CR ( 7)Sb 14 | 583. RY ( 9)Sb 14        | 0.56  | 3.26  | 0.038 |
| 31. CR ( 7)Sb 14 | 585. RY (11)Sb 14        | 0.57  | 3.10  | 0.037 |
| 31. CR ( 7)Sb 14 | 590. RY (16)Sb 14        | 2.81  | 3.65  | 0.090 |
| 31. CR ( 7)Sb 14 | 591. RY (17)Sb 14        | 1.47  | 3.67  | 0.066 |
| 31. CR ( 7)Sb 14 | 592. RY (18)Sb 14        | 0.72  | 3.16  | 0.043 |
| 31. CR ( 7)Sb 14 | 596. RY (22)Sb 14        | 5.30  | 3.78  | 0.126 |
| 31. CR ( 7)Sb 14 | 872. RY ( 1) O 25        | 1.33  | 3.17  | 0.058 |
| 32. CR ( 8)Sb 14 | 576. RY ( 2)Sb 14        | 2.25  | 3.47  | 0.079 |
| 32. CR ( 8)Sb 14 | 578. RY ( 4)Sb 14        | 1.24  | 2.82  | 0.053 |
| 32. CR ( 8)Sb 14 | 579. RY ( 5)Sb 14        | 4.38  | 3.17  | 0.105 |
| 32. CR ( 8)Sb 14 | 582. RY ( 8)Sb 14        | 1.11  | 3.02  | 0.052 |
| 32. CR ( 8)Sb 14 | 583. RY ( 9)Sb 14        | 2.62  | 3.26  | 0.083 |
| 32. CR ( 8)Sb 14 | 586. RY (12)Sb 14        | 0.86  | 3.47  | 0.049 |
| 32. CR ( 8)Sb 14 | 589. RY (15)Sb 14        | 3.00  | 3.09  | 0.086 |
| 32. CR ( 8)Sb 14 | 592. RY (18)Sb 14        | 0.53  | 3.16  | 0.036 |
| 32. CR ( 8)Sb 14 | 594. RY (20)Sb 14        | 1.08  | 4.23  | 0.060 |
| 32. CR ( 8)Sb 14 | 595. RY (21)Sb 14        | 2.28  | 3.48  | 0.080 |
| 32. CR ( 8)Sb 14 | 719. RY ( 4) O 19        | 0.69  | 3.29  | 0.043 |
| 32. CR ( 8)Sb 14 | 847. RY ( 2) O 24        | 0.61  | 3.05  | 0.039 |
| 33. CR ( 9)Sb 14 | 575. RY ( 1)Sb 14        | 2.31  | 3.29  | 0.078 |
| 33. CR ( 9)Sb 14 | 577. RY ( 3)Sb 14        | 2.16  | 3.34  | 0.076 |
| 33. CR ( 9)Sb 14 | 583. RY ( 9)Sb 14        | 0.52  | 3.26  | 0.037 |
| 33. CR ( 9)Sb 14 | 584. RY (10)Sb 14        | 1.92  | 3.18  | 0.070 |
| 33. CR ( 9)Sb 14 | 585. RY (11)Sb 14        | 1.03  | 3.11  | 0.051 |
| 33. CR ( 9)Sb 14 | 586. RY (12)Sb 14        | 1.98  | 3.47  | 0.074 |
| 33. CR ( 9)Sb 14 | 592. RY (18)Sb 14        | 1.39  | 3.16  | 0.059 |
| 33. CR ( 9)Sb 14 | 593. RY (19)Sb 14        | 2.83  | 3.73  | 0.092 |
| 33. CR ( 9)Sb 14 | 595. RY (21)Sb 14        | 1.02  | 3.49  | 0.053 |
| 33. CR ( 9)Sb 14 | 597. RY (23)Sb 14        | 1.65  | 3.68  | 0.070 |
| 33. CR ( 9)Sb 14 | 598. RY (24)Sb 14        | 0.86  | 3.79  | 0.051 |
| 33. CR ( 9)Sb 14 | 873. RY ( 2) O 25        | 0.92  | 3.03  | 0.047 |
| 33. CR ( 9)Sb 14 | 874. RY ( 3) O 25        | 1.45  | 3.33  | 0.062 |
| 34. CR ( 1) O 15 | 192. BD* ( 1) O 15- C 27 | 0.98  | 21.40 | 0.129 |
| 34. CR ( 1) O 15 | 628. RY (17) O 15        | 14.92 | 43.29 | 0.717 |
| 34. CR ( 1) O 15 | 629. RY (18) O 15        | 4.26  | 30.70 | 0.323 |
| 34. CR ( 1) O 15 | 630. RY (19) O 15        | 5.26  | 30.13 | 0.355 |
| 34. CR ( 1) O 15 | 631. RY (20) O 15        | 1.91  | 28.71 | 0.209 |
| 34. CR ( 1) O 15 | 632. RY (21) O 15        | 2.43  | 28.02 | 0.233 |
| 34. CR ( 1) O 15 | 633. RY (22) O 15        | 2.45  | 28.74 | 0.237 |
| 34. CR ( 1) O 15 | 634. RY (23) O 15        | 2.39  | 28.72 | 0.234 |
| 34. CR ( 1) O 15 | 636. RY (25) O 15        | 1.00  | 27.35 | 0.148 |
| 34. CR ( 1) O 15 | 637. RY (26) O 15        | 0.51  | 26.79 | 0.104 |
| 35. CR ( 1) O 16 | 193. BD* ( 1) O 16- C 28 | 0.75  | 21.22 | 0.112 |
| 35. CR ( 1) O 16 | 651. RY (14) O 16        | 0.57  | 26.12 | 0.109 |
| 35. CR ( 1) O 16 | 653. RY (16) O 16        | 19.24 | 56.38 | 0.930 |
| 35. CR ( 1) O 16 | 654. RY (17) O 16        | 2.55  | 28.34 | 0.240 |
| 35. CR ( 1) O 16 | 655. RY (18) O 16        | 1.90  | 28.00 | 0.206 |
| 35. CR ( 1) O 16 | 660. RY (23) O 16        | 0.60  | 26.52 | 0.113 |
| 36. CR ( 1) O 17 | 194. BD* ( 1) O 17- C 27 | 1.05  | 21.46 | 0.134 |
| 36. CR ( 1) O 17 | 195. BD* ( 1) O 17- H 53 | 0.55  | 21.46 | 0.097 |
| 36. CR ( 1) O 17 | 676. RY (13) O 17        | 2.30  | 29.12 | 0.231 |
| 36. CR ( 1) O 17 | 677. RY (14) O 17        | 3.34  | 30.27 | 0.284 |
| 36. CR ( 1) O 17 | 678. RY (15) O 17        | 0.64  | 27.66 | 0.118 |
| 36. CR ( 1) O 17 | 679. RY (16) O 17        | 0.50  | 27.49 | 0.105 |
| 36. CR ( 1) O 17 | 680. RY (17) O 17        | 0.97  | 25.23 | 0.139 |
| 36. CR ( 1) O 17 | 681. RY (18) O 17        | 3.21  | 29.01 | 0.273 |
| 36. CR ( 1) O 17 | 683. RY (20) O 17        | 9.24  | 35.74 | 0.513 |
| 36. CR ( 1) O 17 | 684. RY (21) O 17        | 6.51  | 32.44 | 0.410 |
| 36. CR ( 1) O 17 | 685. RY (22) O 17        | 1.16  | 27.13 | 0.159 |
| 36. CR ( 1) O 17 | 686. RY (23) O 17        | 0.76  | 27.45 | 0.129 |
| 36. CR ( 1) O 17 | 688. RY (25) O 17        | 6.41  | 30.51 | 0.395 |
| 36. CR ( 1) O 17 | 689. RY (26) O 17        | 3.88  | 29.98 | 0.305 |
| 36. CR ( 1) O 17 | 929. RY ( 6) C 27        | 0.55  | 24.17 | 0.103 |
| 37. CR ( 1) O 18 | 196. BD* ( 1) O 18- C 30 | 0.82  | 21.34 | 0.118 |
| 37. CR ( 1) O 18 | 691. RY ( 2) O 18        | 0.53  | 22.40 | 0.097 |
| 37. CR ( 1) O 18 | 702. RY (13) O 18        | 0.88  | 25.17 | 0.133 |
| 37. CR ( 1) O 18 | 704. RY (15) O 18        | 17.74 | 50.62 | 0.846 |
| 37. CR ( 1) O 18 | 706. RY (17) O 18        | 5.18  | 31.22 | 0.359 |
| 37. CR ( 1) O 18 | 707. RY (18) O 18        | 1.40  | 27.35 | 0.174 |
| 37. CR ( 1) O 18 | 709. RY (20) O 18        | 2.24  | 28.08 | 0.224 |
| 37. CR ( 1) O 18 | 714. RY (25) O 18        | 0.52  | 26.91 | 0.106 |
| 37. CR ( 1) O 18 | 715. RY (26) O 18        | 0.54  | 25.63 | 0.105 |
| 38. CR ( 1) O 19 | 197. BD* ( 1) O 19- C 29 | 0.82  | 21.26 | 0.118 |
| 38. CR ( 1) O 19 | 730. RY (15) O 19        | 1.79  | 27.75 | 0.199 |
| 38. CR ( 1) O 19 | 731. RY (16) O 19        | 19.58 | 55.50 | 0.930 |
| 38. CR ( 1) O 19 | 732. RY (17) O 19        | 1.19  | 27.64 | 0.162 |
| 38. CR ( 1) O 19 | 733. RY (18) O 19        | 0.73  | 27.06 | 0.125 |
| 38. CR ( 1) O 19 | 735. RY (20) O 19        | 0.79  | 27.25 | 0.131 |
| 39. CR ( 1) O 20 | 198. BD* ( 1) O 20- C 30 | 1.07  | 21.51 | 0.136 |
| 39. CR ( 1) O 20 | 199. BD* ( 1) O 20- H 54 | 0.53  | 21.46 | 0.095 |
| 39. CR ( 1) O 20 | 755. RY (14) O 20        | 1.37  | 28.43 | 0.176 |
| 39. CR ( 1) O 20 | 756. RY (15) O 20        | 1.99  | 29.62 | 0.217 |

|     |    |       |   |    |       |     |       |   |          |       |       |       |
|-----|----|-------|---|----|-------|-----|-------|---|----------|-------|-------|-------|
| 39. | CR | ( 1 ) | O | 20 | 758.  | RY  | (17)  | O | 20       | 0.70  | 27.36 | 0.124 |
| 39. | CR | ( 1 ) | O | 20 | 759.  | RY  | (18)  | O | 20       | 6.00  | 31.56 | 0.388 |
| 39. | CR | ( 1 ) | O | 20 | 761.  | RY  | (20)  | O | 20       | 7.78  | 33.01 | 0.452 |
| 39. | CR | ( 1 ) | O | 20 | 762.  | RY  | (21)  | O | 20       | 6.70  | 32.31 | 0.415 |
| 39. | CR | ( 1 ) | O | 20 | 764.  | RY  | (23)  | O | 20       | 1.07  | 27.53 | 0.153 |
| 39. | CR | ( 1 ) | O | 20 | 765.  | RY  | (24)  | O | 20       | 2.03  | 28.30 | 0.214 |
| 39. | CR | ( 1 ) | O | 20 | 766.  | RY  | (25)  | O | 20       | 8.57  | 34.43 | 0.485 |
| 39. | CR | ( 1 ) | O | 20 | 767.  | RY  | (26)  | O | 20       | 1.94  | 28.02 | 0.208 |
| 40. | CR | ( 1 ) | O | 21 | 200.  | BD* | ( 1 ) | O | 21- C 32 | 0.73  | 21.21 | 0.111 |
| 40. | CR | ( 1 ) | O | 21 | 783.  | RY  | (16)  | O | 21       | 18.52 | 52.68 | 0.882 |
| 40. | CR | ( 1 ) | O | 21 | 784.  | RY  | (17)  | O | 21       | 1.72  | 28.18 | 0.197 |
| 40. | CR | ( 1 ) | O | 21 | 785.  | RY  | (18)  | O | 21       | 2.81  | 28.73 | 0.254 |
| 40. | CR | ( 1 ) | O | 21 | 786.  | RY  | (19)  | O | 21       | 0.89  | 27.12 | 0.139 |
| 40. | CR | ( 1 ) | O | 21 | 788.  | RY  | (21)  | O | 21       | 0.90  | 26.89 | 0.139 |
| 40. | CR | ( 1 ) | O | 21 | 793.  | RY  | (26)  | O | 21       | 2.99  | 28.68 | 0.262 |
| 41. | CR | ( 1 ) | O | 22 | 201.  | BD* | ( 1 ) | O | 22- C 31 | 0.96  | 21.36 | 0.128 |
| 41. | CR | ( 1 ) | O | 22 | 805.  | RY  | (12)  | O | 22       | 0.54  | 24.91 | 0.104 |
| 41. | CR | ( 1 ) | O | 22 | 807.  | RY  | (14)  | O | 22       | 0.52  | 27.19 | 0.106 |
| 41. | CR | ( 1 ) | O | 22 | 809.  | RY  | (16)  | O | 22       | 1.30  | 27.37 | 0.168 |
| 41. | CR | ( 1 ) | O | 22 | 810.  | RY  | (17)  | O | 22       | 16.03 | 45.06 | 0.759 |
| 41. | CR | ( 1 ) | O | 22 | 811.  | RY  | (18)  | O | 22       | 10.32 | 36.59 | 0.549 |
| 41. | CR | ( 1 ) | O | 22 | 814.  | RY  | (21)  | O | 22       | 1.41  | 27.31 | 0.175 |
| 41. | CR | ( 1 ) | O | 22 | 815.  | RY  | (22)  | O | 22       | 0.68  | 27.48 | 0.122 |
| 41. | CR | ( 1 ) | O | 22 | 817.  | RY  | (24)  | O | 22       | 0.84  | 27.24 | 0.135 |
| 41. | CR | ( 1 ) | O | 22 | 819.  | RY  | (26)  | O | 22       | 0.50  | 25.78 | 0.102 |
| 42. | CR | ( 1 ) | O | 23 | 202.  | BD* | ( 1 ) | O | 23- C 31 | 1.06  | 21.51 | 0.135 |
| 42. | CR | ( 1 ) | O | 23 | 203.  | BD* | ( 1 ) | O | 23- H 55 | 0.53  | 21.46 | 0.095 |
| 42. | CR | ( 1 ) | O | 23 | 832.  | RY  | (13)  | O | 23       | 1.25  | 29.34 | 0.171 |
| 42. | CR | ( 1 ) | O | 23 | 834.  | RY  | (15)  | O | 23       | 1.12  | 25.78 | 0.151 |
| 42. | CR | ( 1 ) | O | 23 | 838.  | RY  | (19)  | O | 23       | 13.26 | 40.20 | 0.652 |
| 42. | CR | ( 1 ) | O | 23 | 839.  | RY  | (20)  | O | 23       | 2.58  | 28.65 | 0.243 |
| 42. | CR | ( 1 ) | O | 23 | 840.  | RY  | (21)  | O | 23       | 2.95  | 29.06 | 0.262 |
| 42. | CR | ( 1 ) | O | 23 | 841.  | RY  | (22)  | O | 23       | 0.87  | 27.32 | 0.138 |
| 42. | CR | ( 1 ) | O | 23 | 842.  | RY  | (23)  | O | 23       | 0.86  | 27.43 | 0.137 |
| 42. | CR | ( 1 ) | O | 23 | 843.  | RY  | (24)  | O | 23       | 9.47  | 34.93 | 0.513 |
| 42. | CR | ( 1 ) | O | 23 | 845.  | RY  | (26)  | O | 23       | 2.38  | 29.44 | 0.236 |
| 43. | CR | ( 1 ) | O | 24 | 204.  | BD* | ( 1 ) | O | 24- C 34 | 0.93  | 21.37 | 0.126 |
| 43. | CR | ( 1 ) | O | 24 | 862.  | RY  | (17)  | O | 24       | 18.53 | 53.20 | 0.886 |
| 43. | CR | ( 1 ) | O | 24 | 864.  | RY  | (19)  | O | 24       | 1.96  | 27.62 | 0.208 |
| 43. | CR | ( 1 ) | O | 24 | 865.  | RY  | (20)  | O | 24       | 0.53  | 27.19 | 0.107 |
| 43. | CR | ( 1 ) | O | 24 | 868.  | RY  | (23)  | O | 24       | 5.04  | 30.50 | 0.350 |
| 44. | CR | ( 1 ) | O | 25 | 205.  | BD* | ( 1 ) | O | 25- C 33 | 0.78  | 21.24 | 0.115 |
| 44. | CR | ( 1 ) | O | 25 | 887.  | RY  | (16)  | O | 25       | 2.89  | 29.10 | 0.259 |
| 44. | CR | ( 1 ) | O | 25 | 889.  | RY  | (18)  | O | 25       | 0.58  | 26.86 | 0.112 |
| 44. | CR | ( 1 ) | O | 25 | 894.  | RY  | (23)  | O | 25       | 1.11  | 27.20 | 0.155 |
| 44. | CR | ( 1 ) | O | 25 | 897.  | RY  | (26)  | O | 25       | 19.62 | 56.11 | 0.937 |
| 45. | CR | ( 1 ) | O | 26 | 206.  | BD* | ( 1 ) | O | 26- C 34 | 1.08  | 21.48 | 0.136 |
| 45. | CR | ( 1 ) | O | 26 | 207.  | BD* | ( 1 ) | O | 26- H 56 | 0.53  | 21.46 | 0.095 |
| 45. | CR | ( 1 ) | O | 26 | 911.  | RY  | (14)  | O | 26       | 3.74  | 30.18 | 0.300 |
| 45. | CR | ( 1 ) | O | 26 | 912.  | RY  | (15)  | O | 26       | 2.04  | 29.76 | 0.220 |
| 45. | CR | ( 1 ) | O | 26 | 913.  | RY  | (16)  | O | 26       | 0.69  | 27.77 | 0.124 |
| 45. | CR | ( 1 ) | O | 26 | 914.  | RY  | (17)  | O | 26       | 1.25  | 27.91 | 0.166 |
| 45. | CR | ( 1 ) | O | 26 | 915.  | RY  | (18)  | O | 26       | 4.89  | 30.32 | 0.344 |
| 45. | CR | ( 1 ) | O | 26 | 917.  | RY  | (20)  | O | 26       | 1.55  | 28.29 | 0.187 |
| 45. | CR | ( 1 ) | O | 26 | 918.  | RY  | (21)  | O | 26       | 11.09 | 36.40 | 0.567 |
| 45. | CR | ( 1 ) | O | 26 | 919.  | RY  | (22)  | O | 26       | 3.71  | 30.46 | 0.300 |
| 45. | CR | ( 1 ) | O | 26 | 920.  | RY  | (23)  | O | 26       | 1.51  | 27.91 | 0.183 |
| 45. | CR | ( 1 ) | O | 26 | 921.  | RY  | (24)  | O | 26       | 2.62  | 28.23 | 0.243 |
| 45. | CR | ( 1 ) | O | 26 | 922.  | RY  | (25)  | O | 26       | 5.12  | 30.38 | 0.352 |
| 45. | CR | ( 1 ) | O | 26 | 923.  | RY  | (26)  | O | 26       | 0.56  | 27.28 | 0.110 |
| 45. | CR | ( 1 ) | O | 26 | 1111. | RY  | ( 6 ) | C | 34       | 0.56  | 24.17 | 0.104 |
| 46. | CR | ( 1 ) | C | 27 | 192.  | BD* | ( 1 ) | O | 15- C 27 | 1.21  | 11.92 | 0.107 |
| 46. | CR | ( 1 ) | C | 27 | 194.  | BD* | ( 1 ) | O | 17- C 27 | 1.07  | 11.93 | 0.101 |
| 46. | CR | ( 1 ) | C | 27 | 208.  | BD* | ( 1 ) | C | 27- C 28 | 1.06  | 11.85 | 0.100 |
| 46. | CR | ( 1 ) | C | 27 | 924.  | RY  | ( 1 ) | C | 27       | 0.76  | 12.84 | 0.088 |
| 46. | CR | ( 1 ) | C | 27 | 928.  | RY  | ( 5 ) | C | 27       | 0.90  | 13.83 | 0.100 |
| 46. | CR | ( 1 ) | C | 27 | 933.  | RY  | (10)  | C | 27       | 0.58  | 13.97 | 0.081 |
| 46. | CR | ( 1 ) | C | 27 | 936.  | RY  | (13)  | C | 27       | 0.50  | 14.42 | 0.076 |
| 46. | CR | ( 1 ) | C | 27 | 939.  | RY  | (16)  | C | 27       | 1.00  | 14.97 | 0.109 |
| 46. | CR | ( 1 ) | C | 27 | 941.  | RY  | (18)  | C | 27       | 0.59  | 14.52 | 0.082 |
| 46. | CR | ( 1 ) | C | 27 | 942.  | RY  | (19)  | C | 27       | 3.72  | 17.17 | 0.226 |
| 46. | CR | ( 1 ) | C | 27 | 943.  | RY  | (20)  | C | 27       | 13.49 | 23.45 | 0.502 |
| 46. | CR | ( 1 ) | C | 27 | 944.  | RY  | (21)  | C | 27       | 9.04  | 19.43 | 0.374 |
| 46. | CR | ( 1 ) | C | 27 | 947.  | RY  | (24)  | C | 27       | 1.91  | 15.51 | 0.154 |
| 46. | CR | ( 1 ) | C | 27 | 948.  | RY  | (25)  | C | 27       | 0.56  | 15.37 | 0.083 |
| 46. | CR | ( 1 ) | C | 27 | 965.  | RY  | (16)  | C | 28       | 0.53  | 15.51 | 0.081 |
| 46. | CR | ( 1 ) | C | 27 | 1242. | RY  | ( 1 ) | H | 57       | 0.51  | 12.73 | 0.072 |
| 47. | CR | ( 1 ) | C | 28 | 193.  | BD* | ( 1 ) | O | 16- C 28 | 1.10  | 11.69 | 0.101 |
| 47. | CR | ( 1 ) | C | 28 | 208.  | BD* | ( 1 ) | C | 27- C 28 | 0.93  | 11.83 | 0.094 |
| 47. | CR | ( 1 ) | C | 28 | 210.  | BD* | ( 1 ) | C | 28- C 29 | 1.10  | 11.84 | 0.102 |
| 47. | CR | ( 1 ) | C | 28 | 211.  | BD* | ( 1 ) | C | 28- H 58 | 0.72  | 11.96 | 0.083 |
| 47. | CR | ( 1 ) | C | 28 | 936.  | RY  | (13)  | C | 27       | 0.75  | 14.40 | 0.093 |
| 47. | CR | ( 1 ) | C | 28 | 953.  | RY  | ( 4 ) | C | 28       | 1.02  | 13.07 | 0.103 |
| 47. | CR | ( 1 ) | C | 28 | 956.  | RY  | ( 7 ) | C | 28       | 0.89  | 13.50 | 0.098 |
| 47. | CR | ( 1 ) | C | 28 | 961.  | RY  | (12)  | C | 28       | 1.44  | 15.52 | 0.133 |
| 47. | CR | ( 1 ) | C | 28 | 962.  | RY  | (13)  | C | 28       | 1.09  | 15.05 | 0.114 |
| 47. | CR | ( 1 ) | C | 28 | 963.  | RY  | (14)  | C | 28       | 2.26  | 15.57 | 0.167 |
| 47. | CR | ( 1 ) | C | 28 | 967.  | RY  | (18)  | C | 28       | 0.93  | 14.97 | 0.105 |
| 47. | CR | ( 1 ) | C | 28 | 969.  | RY  | (20)  | C | 28       | 1.93  | 16.10 | 0.157 |
| 47. | CR | ( 1 ) | C | 28 | 971.  | RY  | (22)  | C | 28       | 7.19  | 18.19 | 0.323 |
| 47. | CR | ( 1 ) | C | 28 | 972.  | RY  | (23)  | C | 28       | 11.23 | 20.20 | 0.425 |
| 47. | CR | ( 1 ) | C | 28 | 973.  | RY  | (24)  | C | 28       | 4.49  | 16.88 | 0.246 |
| 47. | CR | ( 1 ) | C | 28 | 975.  | RY  | (26)  | C | 28       | 0.75  | 15.46 | 0.096 |
| 47. | CR | ( 1 ) | C | 28 | 985.  | RY  | (10)  | C | 29       | 0.54  | 15.26 | 0.081 |
| 48. | CR | ( 1 ) | C | 29 | 197.  | BD* | ( 1 ) | O | 19- C 29 | 1.15  | 11.74 | 0.104 |
| 48. | CR | ( 1 ) | C | 29 | 210.  | BD* | ( 1 ) | C | 28- C 29 | 1.13  | 11.83 | 0.103 |
| 48. | CR | ( 1 ) | C | 29 | 212.  | BD* | ( 1 ) | C | 29- C 30 | 0.86  | 11.81 | 0.090 |
| 48. | CR | ( 1 ) | C | 29 | 213.  | BD* | ( 1 ) | C | 29- H 59 | 0.69  | 11.95 | 0.081 |
| 48. | CR | ( 1 ) | C | 29 | 965.  | RY  | (16)  | C | 28       | 0.53  | 15.49 | 0.081 |
| 48. | CR | ( 1 ) | C | 29 | 978.  | RY  | ( 3 ) | C | 29       | 0.68  | 13.04 | 0.084 |
| 48. | CR | ( 1 ) | C | 29 | 979.  | RY  | ( 4 ) | C | 29       | 0.59  | 13.13 | 0.079 |
| 48. | CR | ( 1 ) | C | 29 | 985.  | RY  | (10)  | C | 29       | 1.91  | 15.25 | 0.152 |
| 48. | CR | ( 1 ) | C | 29 | 989.  | RY  | (14)  | C | 29       | 1.13  | 15.34 | 0.118 |

|                    |                            |       |       |       |
|--------------------|----------------------------|-------|-------|-------|
| 48. CR ( 1 ) C 29  | 995. RY (20) C 29          | 2.97  | 16.48 | 0.197 |
| 48. CR ( 1 ) C 29  | 996. RY (21) C 29          | 2.82  | 16.71 | 0.194 |
| 48. CR ( 1 ) C 29  | 997. RY (22) C 29          | 13.46 | 20.75 | 0.472 |
| 48. CR ( 1 ) C 29  | 998. RY (23) C 29          | 4.21  | 16.36 | 0.234 |
| 48. CR ( 1 ) C 29  | 999. RY (24) C 29          | 1.68  | 15.80 | 0.146 |
| 48. CR ( 1 ) C 29  | 1000. RY (25) C 29         | 3.32  | 16.72 | 0.210 |
| 48. CR ( 1 ) C 29  | 1017. RY (16) C 30         | 0.98  | 14.32 | 0.106 |
| 49. CR ( 1 ) C 30  | 196. BD* ( 1 ) O 18- C 30  | 1.20  | 11.84 | 0.106 |
| 49. CR ( 1 ) C 30  | 198. BD* ( 1 ) O 20- C 30  | 0.96  | 11.95 | 0.096 |
| 49. CR ( 1 ) C 30  | 212. BD* ( 1 ) C 29- C 30  | 1.08  | 11.83 | 0.101 |
| 49. CR ( 1 ) C 30  | 1002. RY ( 1 ) C 30        | 0.55  | 12.89 | 0.075 |
| 49. CR ( 1 ) C 30  | 1019. RY (18) C 30         | 1.99  | 14.90 | 0.154 |
| 49. CR ( 1 ) C 30  | 1020. RY (19) C 30         | 1.15  | 15.69 | 0.120 |
| 49. CR ( 1 ) C 30  | 1022. RY (21) C 30         | 1.43  | 15.74 | 0.134 |
| 49. CR ( 1 ) C 30  | 1023. RY (22) C 30         | 3.67  | 16.91 | 0.222 |
| 49. CR ( 1 ) C 30  | 1024. RY (23) C 30         | 11.55 | 21.06 | 0.440 |
| 49. CR ( 1 ) C 30  | 1025. RY (24) C 30         | 11.93 | 22.21 | 0.459 |
| 49. CR ( 1 ) C 30  | 1026. RY (25) C 30         | 1.60  | 15.91 | 0.142 |
| 49. CR ( 1 ) C 30  | 1027. RY (26) C 30         | 0.69  | 15.27 | 0.092 |
| 50. CR ( 1 ) C 31  | 201. BD* ( 1 ) O 22- C 31  | 1.16  | 11.87 | 0.105 |
| 50. CR ( 1 ) C 31  | 202. BD* ( 1 ) O 23- C 31  | 0.97  | 11.95 | 0.096 |
| 50. CR ( 1 ) C 31  | 215. BD* ( 1 ) C 31- C 32  | 1.02  | 11.86 | 0.098 |
| 50. CR ( 1 ) C 31  | 1028. RY ( 1 ) C 31        | 0.58  | 12.88 | 0.077 |
| 50. CR ( 1 ) C 31  | 1045. RY (18) C 31         | 0.62  | 14.36 | 0.084 |
| 50. CR ( 1 ) C 31  | 1046. RY (19) C 31         | 1.02  | 15.68 | 0.113 |
| 50. CR ( 1 ) C 31  | 1047. RY (20) C 31         | 1.80  | 15.80 | 0.151 |
| 50. CR ( 1 ) C 31  | 1048. RY (21) C 31         | 1.86  | 16.00 | 0.154 |
| 50. CR ( 1 ) C 31  | 1049. RY (22) C 31         | 5.28  | 16.73 | 0.265 |
| 50. CR ( 1 ) C 31  | 1050. RY (23) C 31         | 1.02  | 15.40 | 0.112 |
| 50. CR ( 1 ) C 31  | 1051. RY (24) C 31         | 17.06 | 27.79 | 0.615 |
| 50. CR ( 1 ) C 31  | 1053. RY (26) C 31         | 0.61  | 15.22 | 0.086 |
| 51. CR ( 1 ) C 32  | 200. BD* ( 1 ) O 21- C 32  | 1.10  | 11.69 | 0.101 |
| 51. CR ( 1 ) C 32  | 215. BD* ( 1 ) C 31- C 32  | 0.89  | 11.84 | 0.091 |
| 51. CR ( 1 ) C 32  | 217. BD* ( 1 ) C 32- C 33  | 1.13  | 11.82 | 0.103 |
| 51. CR ( 1 ) C 32  | 218. BD* ( 1 ) C 32- H 62  | 0.71  | 11.95 | 0.083 |
| 51. CR ( 1 ) C 32  | 1043. RY (16) C 31         | 1.20  | 13.90 | 0.115 |
| 51. CR ( 1 ) C 32  | 1056. RY ( 3 ) C 32        | 0.66  | 13.03 | 0.083 |
| 51. CR ( 1 ) C 32  | 1063. RY (10) C 32         | 1.73  | 15.06 | 0.144 |
| 51. CR ( 1 ) C 32  | 1067. RY (14) C 32         | 1.45  | 15.71 | 0.135 |
| 51. CR ( 1 ) C 32  | 1073. RY (20) C 32         | 1.64  | 15.93 | 0.144 |
| 51. CR ( 1 ) C 32  | 1074. RY (21) C 32         | 2.05  | 15.53 | 0.159 |
| 51. CR ( 1 ) C 32  | 1075. RY (22) C 32         | 2.63  | 16.42 | 0.186 |
| 51. CR ( 1 ) C 32  | 1076. RY (23) C 32         | 17.20 | 24.40 | 0.578 |
| 51. CR ( 1 ) C 32  | 1077. RY (24) C 32         | 0.97  | 15.58 | 0.110 |
| 51. CR ( 1 ) C 32  | 1095. RY (16) C 33         | 0.70  | 16.76 | 0.096 |
| 52. CR ( 1 ) C 33  | 205. BD* ( 1 ) O 25- C 33  | 1.14  | 11.72 | 0.103 |
| 52. CR ( 1 ) C 33  | 217. BD* ( 1 ) C 32- C 33  | 1.08  | 11.82 | 0.101 |
| 52. CR ( 1 ) C 33  | 219. BD* ( 1 ) C 33- C 34  | 0.94  | 11.83 | 0.094 |
| 52. CR ( 1 ) C 33  | 220. BD* ( 1 ) C 33- H 63  | 0.71  | 11.96 | 0.082 |
| 52. CR ( 1 ) C 33  | 1063. RY (10) C 32         | 0.64  | 15.06 | 0.087 |
| 52. CR ( 1 ) C 33  | 1083. RY ( 4 ) C 33        | 1.15  | 13.10 | 0.110 |
| 52. CR ( 1 ) C 33  | 1086. RY ( 7 ) C 33        | 1.41  | 13.65 | 0.124 |
| 52. CR ( 1 ) C 33  | 1091. RY (12) C 33         | 1.50  | 15.59 | 0.137 |
| 52. CR ( 1 ) C 33  | 1092. RY (13) C 33         | 0.55  | 14.96 | 0.081 |
| 52. CR ( 1 ) C 33  | 1093. RY (14) C 33         | 2.44  | 15.58 | 0.174 |
| 52. CR ( 1 ) C 33  | 1095. RY (16) C 33         | 2.04  | 16.76 | 0.165 |
| 52. CR ( 1 ) C 33  | 1097. RY (18) C 33         | 0.66  | 15.34 | 0.090 |
| 52. CR ( 1 ) C 33  | 1099. RY (20) C 33         | 3.54  | 16.74 | 0.217 |
| 52. CR ( 1 ) C 33  | 1101. RY (22) C 33         | 4.70  | 16.47 | 0.248 |
| 52. CR ( 1 ) C 33  | 1102. RY (23) C 33         | 6.66  | 18.14 | 0.310 |
| 52. CR ( 1 ) C 33  | 1103. RY (24) C 33         | 7.88  | 18.25 | 0.339 |
| 52. CR ( 1 ) C 33  | 1104. RY (25) C 33         | 0.95  | 15.56 | 0.109 |
| 52. CR ( 1 ) C 33  | 1105. RY (26) C 33         | 1.68  | 15.72 | 0.145 |
| 52. CR ( 1 ) C 33  | 1120. RY (15) C 34         | 0.67  | 13.74 | 0.085 |
| 53. CR ( 1 ) C 34  | 204. BD* ( 1 ) O 24- C 34  | 1.23  | 11.90 | 0.108 |
| 53. CR ( 1 ) C 34  | 206. BD* ( 1 ) O 26- C 34  | 1.04  | 11.94 | 0.100 |
| 53. CR ( 1 ) C 34  | 219. BD* ( 1 ) C 33- C 34  | 1.07  | 11.85 | 0.100 |
| 53. CR ( 1 ) C 34  | 1106. RY ( 1 ) C 34        | 0.65  | 12.86 | 0.082 |
| 53. CR ( 1 ) C 34  | 1110. RY ( 5 ) C 34        | 1.14  | 13.82 | 0.112 |
| 53. CR ( 1 ) C 34  | 1118. RY (13) C 34         | 0.61  | 14.21 | 0.083 |
| 53. CR ( 1 ) C 34  | 1124. RY (19) C 34         | 11.65 | 21.97 | 0.452 |
| 53. CR ( 1 ) C 34  | 1125. RY (20) C 34         | 1.03  | 15.50 | 0.113 |
| 53. CR ( 1 ) C 34  | 1126. RY (21) C 34         | 11.98 | 21.59 | 0.454 |
| 53. CR ( 1 ) C 34  | 1128. RY (23) C 34         | 0.69  | 15.34 | 0.092 |
| 53. CR ( 1 ) C 34  | 1129. RY (24) C 34         | 4.76  | 16.66 | 0.251 |
| 53. CR ( 1 ) C 34  | 1131. RY (26) C 34         | 0.59  | 15.24 | 0.085 |
| 53. CR ( 1 ) C 34  | 1277. RY ( 1 ) H 64        | 0.50  | 12.74 | 0.072 |
| 61. LP ( 1 ) Sb 13 | 187. BD* ( 1 ) Sb 13- O 16 | 12.00 | 0.48  | 0.068 |
| 61. LP ( 1 ) Sb 13 | 188. BD* ( 1 ) Sb 13- O 21 | 11.33 | 0.48  | 0.066 |
| 61. LP ( 1 ) Sb 13 | 192. BD* ( 1 ) O 15- C 27  | 0.57  | 0.69  | 0.018 |
| 61. LP ( 1 ) Sb 13 | 193. BD* ( 1 ) O 16- C 28  | 0.64  | 0.48  | 0.016 |
| 61. LP ( 1 ) Sb 13 | 200. BD* ( 1 ) O 21- C 32  | 0.61  | 0.48  | 0.015 |
| 61. LP ( 1 ) Sb 13 | 538. RY ( 1 ) Sb 13        | 1.38  | 1.69  | 0.043 |
| 61. LP ( 1 ) Sb 13 | 539. RY ( 2 ) Sb 13        | 0.62  | 1.73  | 0.029 |
| 61. LP ( 1 ) Sb 13 | 548. RY (11) Sb 13         | 1.14  | 1.43  | 0.036 |
| 61. LP ( 1 ) Sb 13 | 549. RY (12) Sb 13         | 1.03  | 1.65  | 0.037 |
| 61. LP ( 1 ) Sb 13 | 550. RY (13) Sb 13         | 0.54  | 1.61  | 0.026 |
| 61. LP ( 1 ) Sb 13 | 551. RY (14) Sb 13         | 2.16  | 1.69  | 0.054 |
| 61. LP ( 1 ) Sb 13 | 553. RY (16) Sb 13         | 0.57  | 1.61  | 0.027 |
| 61. LP ( 1 ) Sb 13 | 555. RY (18) Sb 13         | 0.82  | 2.34  | 0.039 |
| 61. LP ( 1 ) Sb 13 | 573. RY (36) Sb 13         | 0.79  | 6.63  | 0.064 |
| 61. LP ( 1 ) Sb 13 | 613. RY ( 2 ) O 15         | 0.71  | 1.59  | 0.030 |
| 61. LP ( 1 ) Sb 13 | 638. RY ( 1 ) O 16         | 0.59  | 1.59  | 0.027 |
| 61. LP ( 1 ) Sb 13 | 768. RY ( 1 ) O 21         | 0.53  | 1.63  | 0.026 |
| 61. LP ( 1 ) Sb 13 | 769. RY ( 2 ) O 21         | 0.60  | 1.52  | 0.027 |
| 61. LP ( 1 ) Sb 13 | 795. RY ( 2 ) O 22         | 0.56  | 1.57  | 0.026 |
| 62. LP ( 1 ) Sb 14 | 190. BD* ( 1 ) Sb 14- O 19 | 11.19 | 0.48  | 0.065 |
| 62. LP ( 1 ) Sb 14 | 191. BD* ( 1 ) Sb 14- O 25 | 11.66 | 0.49  | 0.068 |
| 62. LP ( 1 ) Sb 14 | 196. BD* ( 1 ) O 18- C 30  | 0.55  | 0.61  | 0.016 |
| 62. LP ( 1 ) Sb 14 | 197. BD* ( 1 ) O 19- C 29  | 0.65  | 0.52  | 0.016 |
| 62. LP ( 1 ) Sb 14 | 204. BD* ( 1 ) O 24- C 34  | 0.62  | 0.66  | 0.018 |
| 62. LP ( 1 ) Sb 14 | 205. BD* ( 1 ) O 25- C 33  | 0.74  | 0.50  | 0.017 |
| 62. LP ( 1 ) Sb 14 | 575. RY ( 1 ) Sb 14        | 1.16  | 1.82  | 0.041 |

|                  |                          |       |       |       |
|------------------|--------------------------|-------|-------|-------|
| 62. LP ( 1)Sb 14 | 586. RY (12)Sb 14        | 1.29  | 2.00  | 0.045 |
| 62. LP ( 1)Sb 14 | 589. RY (15)Sb 14        | 2.16  | 1.63  | 0.053 |
| 62. LP ( 1)Sb 14 | 590. RY (16)Sb 14        | 1.01  | 2.19  | 0.042 |
| 62. LP ( 1)Sb 14 | 691. RY ( 2) O 18        | 0.92  | 1.67  | 0.035 |
| 62. LP ( 1)Sb 14 | 717. RY ( 2) O 19        | 0.66  | 1.60  | 0.029 |
| 62. LP ( 1)Sb 14 | 848. RY ( 3) O 24        | 0.54  | 1.58  | 0.026 |
| 62. LP ( 1)Sb 14 | 872. RY ( 1) O 25        | 0.55  | 1.71  | 0.027 |
| 63. LP ( 1) O 15 | 188. BD* ( 1)Sb 13- O 21 | 1.21  | 0.84  | 0.028 |
| 63. LP ( 1) O 15 | 189. BD* ( 1)Sb 13- O 22 | 4.34  | 0.82  | 0.053 |
| 63. LP ( 1) O 15 | 192. BD* ( 1) O 15- C 27 | 0.66  | 1.05  | 0.023 |
| 63. LP ( 1) O 15 | 208. BD* ( 1) C 27- C 28 | 5.05  | 0.97  | 0.063 |
| 63. LP ( 1) O 15 | 614. RY ( 3) O 15        | 19.53 | 1.89  | 0.171 |
| 63. LP ( 1) O 15 | 616. RY ( 5) O 15        | 0.80  | 2.40  | 0.039 |
| 63. LP ( 1) O 15 | 621. RY (10) O 15        | 1.40  | 5.02  | 0.075 |
| 63. LP ( 1) O 15 | 624. RY (13) O 15        | 1.43  | 4.80  | 0.074 |
| 63. LP ( 1) O 15 | 628. RY (17) O 15        | 1.38  | 22.93 | 0.159 |
| 63. LP ( 1) O 15 | 630. RY (19) O 15        | 1.31  | 9.78  | 0.101 |
| 63. LP ( 1) O 15 | 632. RY (21) O 15        | 0.52  | 7.67  | 0.056 |
| 63. LP ( 1) O 15 | 924. RY ( 1) C 27        | 0.66  | 1.96  | 0.032 |
| 63. LP ( 1) O 15 | 925. RY ( 2) C 27        | 0.85  | 2.33  | 0.040 |
| 63. LP ( 1) O 15 | 931. RY ( 8) C 27        | 0.75  | 2.87  | 0.041 |
| 64. LP ( 2) O 15 | 188. BD* ( 1)Sb 13- O 21 | 0.92  | 0.56  | 0.020 |
| 64. LP ( 2) O 15 | 208. BD* ( 1) C 27- C 28 | 1.32  | 0.69  | 0.027 |
| 64. LP ( 2) O 15 | 209. BD* ( 1) C 27- H 57 | 7.07  | 0.76  | 0.065 |
| 64. LP ( 2) O 15 | 612. RY ( 1) O 15        | 26.78 | 1.47  | 0.177 |
| 64. LP ( 2) O 15 | 615. RY ( 4) O 15        | 1.79  | 2.47  | 0.059 |
| 64. LP ( 2) O 15 | 626. RY (15) O 15        | 0.94  | 5.85  | 0.066 |
| 64. LP ( 2) O 15 | 637. RY (26) O 15        | 0.80  | 6.15  | 0.063 |
| 64. LP ( 2) O 15 | 926. RY ( 3) C 27        | 1.06  | 2.34  | 0.044 |
| 64. LP ( 2) O 15 | 927. RY ( 4) C 27        | 1.35  | 1.78  | 0.044 |
| 64. LP ( 2) O 15 | 937. RY (14) C 27        | 0.56  | 2.99  | 0.037 |
| 65. LP ( 3) O 15 | 187. BD* ( 1)Sb 13- O 16 | 6.96  | 0.67  | 0.061 |
| 65. LP ( 3) O 15 | 188. BD* ( 1)Sb 13- O 21 | 7.37  | 0.68  | 0.063 |
| 65. LP ( 3) O 15 | 189. BD* ( 1)Sb 13- O 22 | 16.76 | 0.66  | 0.094 |
| 65. LP ( 3) O 15 | 194. BD* ( 1) O 17- C 27 | 16.99 | 0.89  | 0.110 |
| 65. LP ( 3) O 15 | 208. BD* ( 1) C 27- C 28 | 3.48  | 0.81  | 0.047 |
| 65. LP ( 3) O 15 | 209. BD* ( 1) C 27- H 57 | 0.70  | 0.88  | 0.022 |
| 65. LP ( 3) O 15 | 538. RY ( 1)Sb 13        | 5.18  | 1.89  | 0.088 |
| 65. LP ( 3) O 15 | 540. RY ( 3)Sb 13        | 0.74  | 1.96  | 0.034 |
| 65. LP ( 3) O 15 | 543. RY ( 6)Sb 13        | 0.70  | 1.77  | 0.032 |
| 65. LP ( 3) O 15 | 549. RY (12)Sb 13        | 1.32  | 1.84  | 0.044 |
| 65. LP ( 3) O 15 | 551. RY (14)Sb 13        | 1.47  | 1.88  | 0.047 |
| 65. LP ( 3) O 15 | 555. RY (18)Sb 13        | 2.59  | 2.54  | 0.072 |
| 65. LP ( 3) O 15 | 558. RY (21)Sb 13        | 0.77  | 2.65  | 0.040 |
| 65. LP ( 3) O 15 | 560. RY (23)Sb 13        | 0.78  | 2.64  | 0.040 |
| 65. LP ( 3) O 15 | 569. RY (32)Sb 13        | 2.41  | 51.17 | 0.313 |
| 65. LP ( 3) O 15 | 572. RY (35)Sb 13        | 0.51  | 4.38  | 0.042 |
| 65. LP ( 3) O 15 | 613. RY ( 2) O 15        | 15.90 | 1.78  | 0.150 |
| 65. LP ( 3) O 15 | 614. RY ( 3) O 15        | 0.74  | 1.72  | 0.032 |
| 65. LP ( 3) O 15 | 623. RY (12) O 15        | 0.52  | 5.03  | 0.046 |
| 65. LP ( 3) O 15 | 625. RY (14) O 15        | 1.57  | 5.01  | 0.079 |
| 65. LP ( 3) O 15 | 628. RY (17) O 15        | 0.82  | 22.77 | 0.122 |
| 65. LP ( 3) O 15 | 629. RY (18) O 15        | 0.72  | 10.18 | 0.076 |
| 65. LP ( 3) O 15 | 924. RY ( 1) C 27        | 2.77  | 1.80  | 0.063 |
| 65. LP ( 3) O 15 | 925. RY ( 2) C 27        | 2.03  | 2.17  | 0.059 |
| 65. LP ( 3) O 15 | 929. RY ( 6) C 27        | 0.64  | 3.60  | 0.043 |
| 65. LP ( 3) O 15 | 938. RY (15) C 27        | 0.61  | 3.02  | 0.038 |
| 66. LP ( 1) O 16 | 193. BD* ( 1) O 16- C 28 | 1.23  | 0.86  | 0.029 |
| 66. LP ( 1) O 16 | 208. BD* ( 1) C 27- C 28 | 1.73  | 0.99  | 0.037 |
| 66. LP ( 1) O 16 | 544. RY ( 7)Sb 13        | 0.93  | 2.02  | 0.039 |
| 66. LP ( 1) O 16 | 638. RY ( 1) O 16        | 2.86  | 1.98  | 0.067 |
| 66. LP ( 1) O 16 | 639. RY ( 2) O 16        | 6.12  | 1.85  | 0.095 |
| 66. LP ( 1) O 16 | 640. RY ( 3) O 16        | 8.78  | 2.06  | 0.120 |
| 66. LP ( 1) O 16 | 641. RY ( 4) O 16        | 0.64  | 2.34  | 0.035 |
| 66. LP ( 1) O 16 | 643. RY ( 6) O 16        | 0.53  | 3.10  | 0.036 |
| 66. LP ( 1) O 16 | 651. RY (14) O 16        | 1.34  | 5.77  | 0.079 |
| 66. LP ( 1) O 16 | 653. RY (16) O 16        | 1.20  | 36.02 | 0.186 |
| 66. LP ( 1) O 16 | 663. RY (26) O 16        | 1.23  | 5.40  | 0.073 |
| 66. LP ( 1) O 16 | 951. RY ( 2) C 28        | 0.50  | 1.98  | 0.028 |
| 66. LP ( 1) O 16 | 955. RY ( 6) C 28        | 0.69  | 2.92  | 0.040 |
| 67. LP ( 2) O 16 | 188. BD* ( 1)Sb 13- O 21 | 1.09  | 0.57  | 0.022 |
| 67. LP ( 2) O 16 | 210. BD* ( 1) C 28- C 29 | 2.29  | 0.71  | 0.036 |
| 67. LP ( 2) O 16 | 211. BD* ( 1) C 28- H 58 | 3.09  | 0.83  | 0.045 |
| 67. LP ( 2) O 16 | 539. RY ( 2)Sb 13        | 0.84  | 1.82  | 0.035 |
| 67. LP ( 2) O 16 | 542. RY ( 5)Sb 13        | 0.72  | 1.62  | 0.031 |
| 67. LP ( 2) O 16 | 638. RY ( 1) O 16        | 14.69 | 1.69  | 0.141 |
| 67. LP ( 2) O 16 | 639. RY ( 2) O 16        | 10.69 | 1.56  | 0.115 |
| 67. LP ( 2) O 16 | 650. RY (13) O 16        | 0.90  | 5.16  | 0.061 |
| 67. LP ( 2) O 16 | 652. RY (15) O 16        | 1.04  | 5.62  | 0.068 |
| 67. LP ( 2) O 16 | 661. RY (24) O 16        | 0.91  | 5.98  | 0.066 |
| 67. LP ( 2) O 16 | 952. RY ( 3) C 28        | 2.05  | 1.84  | 0.055 |
| 68. LP ( 1) O 17 | 192. BD* ( 1) O 15- C 27 | 1.46  | 1.03  | 0.035 |
| 68. LP ( 1) O 17 | 208. BD* ( 1) C 27- C 28 | 5.77  | 0.96  | 0.066 |
| 68. LP ( 1) O 17 | 665. RY ( 2) O 17        | 12.56 | 1.91  | 0.138 |
| 68. LP ( 1) O 17 | 666. RY ( 3) O 17        | 4.21  | 2.91  | 0.099 |
| 68. LP ( 1) O 17 | 668. RY ( 5) O 17        | 2.38  | 2.65  | 0.071 |
| 68. LP ( 1) O 17 | 670. RY ( 7) O 17        | 0.80  | 3.76  | 0.049 |
| 68. LP ( 1) O 17 | 671. RY ( 8) O 17        | 0.91  | 3.33  | 0.049 |
| 68. LP ( 1) O 17 | 673. RY (10) O 17        | 1.54  | 4.36  | 0.073 |
| 68. LP ( 1) O 17 | 683. RY (20) O 17        | 0.78  | 15.32 | 0.098 |
| 68. LP ( 1) O 17 | 684. RY (21) O 17        | 0.71  | 12.01 | 0.083 |
| 68. LP ( 1) O 17 | 688. RY (25) O 17        | 1.02  | 10.09 | 0.091 |
| 68. LP ( 1) O 17 | 924. RY ( 1) C 27        | 0.61  | 1.95  | 0.031 |
| 68. LP ( 1) O 17 | 925. RY ( 2) C 27        | 0.76  | 2.32  | 0.037 |
| 68. LP ( 1) O 17 | 934. RY (11) C 27        | 0.73  | 2.50  | 0.038 |
| 69. LP ( 2) O 17 | 192. BD* ( 1) O 15- C 27 | 0.85  | 0.83  | 0.024 |
| 69. LP ( 2) O 17 | 209. BD* ( 1) C 27- H 57 | 7.64  | 0.83  | 0.071 |
| 69. LP ( 2) O 17 | 664. RY ( 1) O 17        | 23.93 | 1.53  | 0.171 |
| 69. LP ( 2) O 17 | 665. RY ( 2) O 17        | 0.81  | 1.70  | 0.033 |
| 69. LP ( 2) O 17 | 666. RY ( 3) O 17        | 1.65  | 2.71  | 0.060 |
| 69. LP ( 2) O 17 | 667. RY ( 4) O 17        | 2.29  | 2.60  | 0.069 |
| 69. LP ( 2) O 17 | 668. RY ( 5) O 17        | 0.87  | 2.45  | 0.041 |
| 69. LP ( 2) O 17 | 669. RY ( 6) O 17        | 1.11  | 2.32  | 0.045 |



|                   |                            |       |       |       |
|-------------------|----------------------------|-------|-------|-------|
| 69. LP ( 2 ) O 17 | 675. RY (12) O 17          | 1.73  | 3.65  | 0.071 |
| 69. LP ( 2 ) O 17 | 676. RY (13) O 17          | 0.50  | 8.49  | 0.058 |
| 69. LP ( 2 ) O 17 | 927. RY ( 4 ) C 27         | 1.16  | 1.85  | 0.041 |
| 69. LP ( 2 ) O 17 | 935. RY (12) C 27          | 1.00  | 3.30  | 0.051 |
| 69. LP ( 2 ) O 17 | 1223. RY ( 2 ) H 53        | 1.14  | 2.51  | 0.048 |
| 70. LP ( 1 ) O 18 | 156. LV ( 1 ) Sb 14        | 5.93  | 0.83  | 0.063 |
| 70. LP ( 1 ) O 18 | 212. BD* ( 1 ) C 29- C 30  | 3.85  | 0.99  | 0.055 |
| 70. LP ( 1 ) O 18 | 691. RY ( 2 ) O 18         | 4.28  | 2.06  | 0.084 |
| 70. LP ( 1 ) O 18 | 692. RY ( 3 ) O 18         | 13.97 | 1.92  | 0.146 |
| 70. LP ( 1 ) O 18 | 700. RY (11) O 18          | 0.66  | 5.85  | 0.056 |
| 70. LP ( 1 ) O 18 | 701. RY (12) O 18          | 0.61  | 5.16  | 0.050 |
| 70. LP ( 1 ) O 18 | 702. RY (13) O 18          | 1.61  | 4.83  | 0.079 |
| 70. LP ( 1 ) O 18 | 703. RY (14) O 18          | 0.75  | 5.77  | 0.059 |
| 70. LP ( 1 ) O 18 | 704. RY (15) O 18          | 1.29  | 30.29 | 0.177 |
| 70. LP ( 1 ) O 18 | 706. RY (17) O 18          | 0.56  | 10.89 | 0.070 |
| 70. LP ( 1 ) O 18 | 715. RY (26) O 18          | 0.73  | 5.29  | 0.056 |
| 70. LP ( 1 ) O 18 | 1003. RY ( 2 ) C 30        | 0.92  | 2.35  | 0.041 |
| 70. LP ( 1 ) O 18 | 1009. RY ( 8 ) C 30        | 0.58  | 3.11  | 0.038 |
| 70. LP ( 1 ) O 18 | 1013. RY (12) C 30         | 0.57  | 2.59  | 0.034 |
| 71. LP ( 2 ) O 18 | 156. LV ( 1 ) Sb 14        | 11.89 | 0.55  | 0.073 |
| 71. LP ( 2 ) O 18 | 190. BD* ( 1 ) Sb 14- O 19 | 2.99  | 0.60  | 0.038 |
| 71. LP ( 2 ) O 18 | 191. BD* ( 1 ) Sb 14- O 25 | 2.20  | 0.61  | 0.033 |
| 71. LP ( 2 ) O 18 | 198. BD* ( 1 ) O 20- C 30  | 9.35  | 0.84  | 0.079 |
| 71. LP ( 2 ) O 18 | 212. BD* ( 1 ) C 29- C 30  | 0.61  | 0.72  | 0.019 |
| 71. LP ( 2 ) O 18 | 214. BD* ( 1 ) C 30- H 60  | 2.95  | 0.83  | 0.044 |
| 71. LP ( 2 ) O 18 | 577. RY ( 3 ) Sb 14        | 0.58  | 1.99  | 0.030 |
| 71. LP ( 2 ) O 18 | 578. RY ( 4 ) Sb 14        | 1.00  | 1.48  | 0.034 |
| 71. LP ( 2 ) O 18 | 584. RY (10) Sb 14         | 0.98  | 1.84  | 0.038 |
| 71. LP ( 2 ) O 18 | 593. RY (19) Sb 14         | 0.56  | 2.39  | 0.033 |
| 71. LP ( 2 ) O 18 | 595. RY (21) Sb 14         | 0.56  | 2.14  | 0.031 |
| 71. LP ( 2 ) O 18 | 604. RY (30) Sb 14         | 0.77  | 14.53 | 0.094 |
| 71. LP ( 2 ) O 18 | 610. RY (36) Sb 14         | 0.81  | 18.69 | 0.110 |
| 71. LP ( 2 ) O 18 | 611. RY (37) Sb 14         | 0.77  | 16.17 | 0.099 |
| 71. LP ( 2 ) O 18 | 690. RY ( 1 ) O 18         | 22.54 | 1.53  | 0.166 |
| 71. LP ( 2 ) O 18 | 691. RY ( 2 ) O 18         | 0.95  | 1.79  | 0.037 |
| 71. LP ( 2 ) O 18 | 692. RY ( 3 ) O 18         | 1.53  | 1.65  | 0.045 |
| 71. LP ( 2 ) O 18 | 701. RY (12) O 18          | 0.55  | 4.89  | 0.046 |
| 71. LP ( 2 ) O 18 | 702. RY (13) O 18          | 0.68  | 4.56  | 0.050 |
| 71. LP ( 2 ) O 18 | 703. RY (14) O 18          | 1.25  | 5.49  | 0.074 |
| 71. LP ( 2 ) O 18 | 714. RY (25) O 18          | 0.67  | 6.30  | 0.058 |
| 71. LP ( 2 ) O 18 | 1002. RY ( 1 ) C 30        | 0.73  | 1.77  | 0.032 |
| 71. LP ( 2 ) O 18 | 1003. RY ( 2 ) C 30        | 1.60  | 2.08  | 0.051 |
| 72. LP ( 3 ) O 18 | 156. LV ( 1 ) Sb 14        | 18.34 | 0.59  | 0.093 |
| 72. LP ( 3 ) O 18 | 190. BD* ( 1 ) Sb 14- O 19 | 4.67  | 0.64  | 0.049 |
| 72. LP ( 3 ) O 18 | 191. BD* ( 1 ) Sb 14- O 25 | 0.94  | 0.65  | 0.022 |
| 72. LP ( 3 ) O 18 | 198. BD* ( 1 ) O 20- C 30  | 5.25  | 0.88  | 0.061 |
| 72. LP ( 3 ) O 18 | 212. BD* ( 1 ) C 29- C 30  | 2.84  | 0.76  | 0.041 |
| 72. LP ( 3 ) O 18 | 214. BD* ( 1 ) C 30- H 60  | 1.62  | 0.87  | 0.033 |
| 72. LP ( 3 ) O 18 | 576. RY ( 2 ) Sb 14        | 1.33  | 2.16  | 0.048 |
| 72. LP ( 3 ) O 18 | 577. RY ( 3 ) Sb 14        | 0.74  | 2.03  | 0.035 |
| 72. LP ( 3 ) O 18 | 589. RY (15) Sb 14         | 0.67  | 1.79  | 0.031 |
| 72. LP ( 3 ) O 18 | 593. RY (19) Sb 14         | 0.65  | 2.43  | 0.035 |
| 72. LP ( 3 ) O 18 | 594. RY (20) Sb 14         | 0.82  | 2.93  | 0.044 |
| 72. LP ( 3 ) O 18 | 595. RY (21) Sb 14         | 0.51  | 2.18  | 0.030 |
| 72. LP ( 3 ) O 18 | 596. RY (22) Sb 14         | 0.74  | 2.47  | 0.038 |
| 72. LP ( 3 ) O 18 | 604. RY (30) Sb 14         | 0.99  | 14.57 | 0.107 |
| 72. LP ( 3 ) O 18 | 609. RY (35) Sb 14         | 0.65  | 13.80 | 0.085 |
| 72. LP ( 3 ) O 18 | 610. RY (36) Sb 14         | 1.21  | 18.72 | 0.134 |
| 72. LP ( 3 ) O 18 | 611. RY (37) Sb 14         | 1.06  | 16.20 | 0.117 |
| 72. LP ( 3 ) O 18 | 690. RY ( 1 ) O 18         | 5.55  | 1.57  | 0.083 |
| 72. LP ( 3 ) O 18 | 691. RY ( 2 ) O 18         | 6.91  | 1.83  | 0.100 |
| 72. LP ( 3 ) O 18 | 692. RY ( 3 ) O 18         | 5.66  | 1.68  | 0.087 |
| 72. LP ( 3 ) O 18 | 693. RY ( 4 ) O 18         | 0.58  | 2.89  | 0.036 |
| 72. LP ( 3 ) O 18 | 702. RY (13) O 18          | 0.75  | 4.59  | 0.052 |
| 72. LP ( 3 ) O 18 | 704. RY (15) O 18          | 0.70  | 30.05 | 0.129 |
| 72. LP ( 3 ) O 18 | 715. RY (26) O 18          | 1.48  | 5.06  | 0.077 |
| 72. LP ( 3 ) O 18 | 1002. RY ( 1 ) C 30        | 0.61  | 1.81  | 0.030 |
| 72. LP ( 3 ) O 18 | 1003. RY ( 2 ) C 30        | 1.10  | 2.11  | 0.043 |
| 72. LP ( 3 ) O 18 | 1004. RY ( 3 ) C 30        | 0.84  | 2.32  | 0.039 |
| 73. LP ( 1 ) O 19 | 156. LV ( 1 ) Sb 14        | 1.02  | 0.79  | 0.025 |
| 73. LP ( 1 ) O 19 | 197. BD* ( 1 ) O 19- C 29  | 1.06  | 0.88  | 0.027 |
| 73. LP ( 1 ) O 19 | 212. BD* ( 1 ) C 29- C 30  | 2.64  | 0.96  | 0.045 |
| 73. LP ( 1 ) O 19 | 579. RY ( 5 ) Sb 14        | 0.68  | 2.07  | 0.034 |
| 73. LP ( 1 ) O 19 | 716. RY ( 1 ) O 19         | 3.82  | 2.01  | 0.078 |
| 73. LP ( 1 ) O 19 | 717. RY ( 2 ) O 19         | 5.42  | 1.96  | 0.092 |
| 73. LP ( 1 ) O 19 | 718. RY ( 3 ) O 19         | 8.80  | 2.11  | 0.122 |
| 73. LP ( 1 ) O 19 | 729. RY (14) O 19          | 2.73  | 4.93  | 0.103 |
| 73. LP ( 1 ) O 19 | 731. RY (16) O 19          | 1.20  | 35.13 | 0.183 |
| 73. LP ( 1 ) O 19 | 978. RY ( 3 ) C 29         | 0.55  | 2.18  | 0.031 |
| 73. LP ( 1 ) O 19 | 979. RY ( 4 ) C 29         | 0.80  | 2.27  | 0.038 |
| 73. LP ( 1 ) O 19 | 982. RY ( 7 ) C 29         | 0.80  | 2.53  | 0.040 |
| 74. LP ( 2 ) O 19 | 191. BD* ( 1 ) Sb 14- O 25 | 0.99  | 0.59  | 0.021 |
| 74. LP ( 2 ) O 19 | 210. BD* ( 1 ) C 28- C 29  | 3.69  | 0.71  | 0.046 |
| 74. LP ( 2 ) O 19 | 213. BD* ( 1 ) C 29- H 59  | 3.91  | 0.83  | 0.051 |
| 74. LP ( 2 ) O 19 | 575. RY ( 1 ) Sb 14        | 1.38  | 1.91  | 0.046 |
| 74. LP ( 2 ) O 19 | 580. RY ( 6 ) Sb 14        | 0.86  | 1.77  | 0.035 |
| 74. LP ( 2 ) O 19 | 716. RY ( 1 ) O 19         | 14.56 | 1.75  | 0.142 |
| 74. LP ( 2 ) O 19 | 717. RY ( 2 ) O 19         | 9.27  | 1.70  | 0.112 |
| 74. LP ( 2 ) O 19 | 728. RY (13) O 19          | 0.81  | 4.94  | 0.057 |
| 74. LP ( 2 ) O 19 | 736. RY (21) O 19          | 0.54  | 5.92  | 0.050 |
| 74. LP ( 2 ) O 19 | 741. RY (26) O 19          | 2.16  | 5.08  | 0.094 |
| 74. LP ( 2 ) O 19 | 977. RY ( 2 ) C 29         | 0.69  | 1.74  | 0.031 |
| 74. LP ( 2 ) O 19 | 979. RY ( 4 ) C 29         | 1.34  | 2.01  | 0.046 |
| 74. LP ( 2 ) O 19 | 981. RY ( 6 ) C 29         | 0.63  | 2.31  | 0.034 |
| 75. LP ( 1 ) O 20 | 196. BD* ( 1 ) O 18- C 30  | 1.71  | 0.97  | 0.036 |
| 75. LP ( 1 ) O 20 | 212. BD* ( 1 ) C 29- C 30  | 6.78  | 0.96  | 0.072 |
| 75. LP ( 1 ) O 20 | 743. RY ( 2 ) O 20         | 11.10 | 1.93  | 0.131 |
| 75. LP ( 1 ) O 20 | 744. RY ( 3 ) O 20         | 6.80  | 2.53  | 0.117 |
| 75. LP ( 1 ) O 20 | 746. RY ( 5 ) O 20         | 2.32  | 2.61  | 0.069 |
| 75. LP ( 1 ) O 20 | 750. RY ( 9 ) O 20         | 2.94  | 3.28  | 0.088 |
| 75. LP ( 1 ) O 20 | 757. RY (16) O 20          | 0.80  | 6.09  | 0.062 |
| 75. LP ( 1 ) O 20 | 759. RY (18) O 20          | 0.61  | 11.14 | 0.074 |
| 75. LP ( 1 ) O 20 | 761. RY (20) O 20          | 0.87  | 12.58 | 0.093 |

|                   |                           |       |       |       |
|-------------------|---------------------------|-------|-------|-------|
| 75. LP ( 1 ) O 20 | 762. RY (21) O 20         | 0.68  | 11.88 | 0.080 |
| 75. LP ( 1 ) O 20 | 766. RY (25) O 20         | 0.72  | 14.01 | 0.090 |
| 75. LP ( 1 ) O 20 | 1002. RY ( 1 ) C 30       | 1.51  | 2.01  | 0.049 |
| 75. LP ( 1 ) O 20 | 1003. RY ( 2 ) C 30       | 0.66  | 2.32  | 0.035 |
| 76. LP ( 2 ) O 20 | 196. BD*( 1 ) O 18- C 30  | 1.02  | 0.77  | 0.025 |
| 76. LP ( 2 ) O 20 | 212. BD*( 1 ) C 29- C 30  | 0.52  | 0.76  | 0.018 |
| 76. LP ( 2 ) O 20 | 214. BD*( 1 ) C 30- H 60  | 6.41  | 0.87  | 0.067 |
| 76. LP ( 2 ) O 20 | 742. RY ( 1 ) O 20        | 25.98 | 1.56  | 0.179 |
| 76. LP ( 2 ) O 20 | 743. RY ( 2 ) O 20        | 1.12  | 1.73  | 0.039 |
| 76. LP ( 2 ) O 20 | 744. RY ( 3 ) O 20        | 2.23  | 2.33  | 0.064 |
| 76. LP ( 2 ) O 20 | 745. RY ( 4 ) O 20        | 1.04  | 2.67  | 0.047 |
| 76. LP ( 2 ) O 20 | 747. RY ( 6 ) O 20        | 0.96  | 2.82  | 0.047 |
| 76. LP ( 2 ) O 20 | 749. RY ( 8 ) O 20        | 0.81  | 2.99  | 0.044 |
| 76. LP ( 2 ) O 20 | 753. RY (12) O 20         | 1.70  | 3.64  | 0.070 |
| 76. LP ( 2 ) O 20 | 755. RY (14) O 20         | 0.55  | 7.80  | 0.059 |
| 76. LP ( 2 ) O 20 | 757. RY (16) O 20         | 0.55  | 5.89  | 0.051 |
| 76. LP ( 2 ) O 20 | 1004. RY ( 3 ) C 30       | 0.60  | 2.32  | 0.033 |
| 76. LP ( 2 ) O 20 | 1228. RY ( 2 ) H 54       | 0.81  | 2.60  | 0.041 |
| 77. LP ( 1 ) O 21 | 200. BD*( 1 ) O 21- C 32  | 1.17  | 0.85  | 0.028 |
| 77. LP ( 1 ) O 21 | 215. BD*( 1 ) C 31- C 32  | 1.66  | 1.00  | 0.036 |
| 77. LP ( 1 ) O 21 | 542. RY ( 5 ) Sb 13       | 0.63  | 1.90  | 0.031 |
| 77. LP ( 1 ) O 21 | 545. RY ( 8 ) Sb 13       | 0.67  | 2.05  | 0.033 |
| 77. LP ( 1 ) O 21 | 768. RY ( 1 ) O 21        | 3.61  | 2.00  | 0.076 |
| 77. LP ( 1 ) O 21 | 769. RY ( 2 ) O 21        | 4.28  | 1.90  | 0.080 |
| 77. LP ( 1 ) O 21 | 770. RY ( 3 ) O 21        | 9.96  | 2.04  | 0.127 |
| 77. LP ( 1 ) O 21 | 782. RY (15) O 21         | 3.59  | 4.60  | 0.115 |
| 77. LP ( 1 ) O 21 | 783. RY (16) O 21         | 1.13  | 32.32 | 0.171 |
| 77. LP ( 1 ) O 21 | 793. RY (26) O 21         | 0.59  | 8.32  | 0.062 |
| 77. LP ( 1 ) O 21 | 1057. RY ( 4 ) C 32       | 0.89  | 2.34  | 0.041 |
| 77. LP ( 1 ) O 21 | 1060. RY ( 7 ) C 32       | 0.92  | 2.64  | 0.044 |
| 78. LP ( 2 ) O 21 | 187. BD*( 1 ) Sb 13- O 16 | 1.13  | 0.56  | 0.022 |
| 78. LP ( 2 ) O 21 | 217. BD*( 1 ) C 32- C 33  | 2.59  | 0.69  | 0.038 |
| 78. LP ( 2 ) O 21 | 218. BD*( 1 ) C 32- H 62  | 3.04  | 0.82  | 0.045 |
| 78. LP ( 2 ) O 21 | 539. RY ( 2 ) Sb 13       | 0.97  | 1.82  | 0.037 |
| 78. LP ( 2 ) O 21 | 543. RY ( 6 ) Sb 13       | 0.57  | 1.65  | 0.028 |
| 78. LP ( 2 ) O 21 | 768. RY ( 1 ) O 21        | 13.89 | 1.71  | 0.137 |
| 78. LP ( 2 ) O 21 | 769. RY ( 2 ) O 21        | 11.14 | 1.61  | 0.119 |
| 78. LP ( 2 ) O 21 | 781. RY (14) O 21         | 3.04  | 4.74  | 0.107 |
| 78. LP ( 2 ) O 21 | 1057. RY ( 4 ) C 32       | 1.33  | 2.05  | 0.047 |
| 78. LP ( 2 ) O 21 | 1059. RY ( 6 ) C 32       | 0.57  | 2.22  | 0.032 |
| 79. LP ( 1 ) O 22 | 189. BD*( 1 ) Sb 13- O 22 | 1.43  | 0.85  | 0.031 |
| 79. LP ( 1 ) O 22 | 201. BD*( 1 ) O 22- C 31  | 0.99  | 1.02  | 0.028 |
| 79. LP ( 1 ) O 22 | 215. BD*( 1 ) C 31- C 32  | 4.76  | 1.01  | 0.062 |
| 79. LP ( 1 ) O 22 | 795. RY ( 2 ) O 22        | 0.66  | 1.96  | 0.032 |
| 79. LP ( 1 ) O 22 | 796. RY ( 3 ) O 22        | 19.23 | 1.90  | 0.171 |
| 79. LP ( 1 ) O 22 | 798. RY ( 5 ) O 22        | 0.62  | 2.43  | 0.035 |
| 79. LP ( 1 ) O 22 | 802. RY ( 9 ) O 22        | 0.82  | 2.98  | 0.044 |
| 79. LP ( 1 ) O 22 | 805. RY (12) O 22         | 2.20  | 4.57  | 0.090 |
| 79. LP ( 1 ) O 22 | 810. RY (17) O 22         | 1.45  | 24.72 | 0.169 |
| 79. LP ( 1 ) O 22 | 811. RY (18) O 22         | 1.17  | 16.25 | 0.123 |
| 79. LP ( 1 ) O 22 | 814. RY (21) O 22         | 0.72  | 6.97  | 0.063 |
| 79. LP ( 1 ) O 22 | 1029. RY ( 2 ) C 31       | 0.85  | 2.35  | 0.040 |
| 80. LP ( 2 ) O 22 | 187. BD*( 1 ) Sb 13- O 16 | 2.80  | 0.61  | 0.037 |
| 80. LP ( 2 ) O 22 | 188. BD*( 1 ) Sb 13- O 21 | 0.99  | 0.61  | 0.022 |
| 80. LP ( 2 ) O 22 | 189. BD*( 1 ) Sb 13- O 22 | 10.29 | 0.59  | 0.070 |
| 80. LP ( 2 ) O 22 | 202. BD*( 1 ) O 23- C 31  | 10.31 | 0.85  | 0.084 |
| 80. LP ( 2 ) O 22 | 215. BD*( 1 ) C 31- C 32  | 0.67  | 0.75  | 0.020 |
| 80. LP ( 2 ) O 22 | 216. BD*( 1 ) C 31- H 61  | 3.05  | 0.84  | 0.045 |
| 80. LP ( 2 ) O 22 | 540. RY ( 3 ) Sb 13       | 1.07  | 1.90  | 0.040 |
| 80. LP ( 2 ) O 22 | 541. RY ( 4 ) Sb 13       | 1.27  | 1.54  | 0.040 |
| 80. LP ( 2 ) O 22 | 550. RY (13) Sb 13        | 0.77  | 1.74  | 0.033 |
| 80. LP ( 2 ) O 22 | 555. RY (18) Sb 13        | 1.01  | 2.47  | 0.045 |
| 80. LP ( 2 ) O 22 | 560. RY (23) Sb 13        | 0.55  | 2.58  | 0.034 |
| 80. LP ( 2 ) O 22 | 569. RY (32) Sb 13        | 1.14  | 51.10 | 0.215 |
| 80. LP ( 2 ) O 22 | 794. RY ( 1 ) O 22        | 22.49 | 1.51  | 0.165 |
| 80. LP ( 2 ) O 22 | 795. RY ( 2 ) O 22        | 3.01  | 1.70  | 0.064 |
| 80. LP ( 2 ) O 22 | 796. RY ( 3 ) O 22        | 1.02  | 1.64  | 0.037 |
| 80. LP ( 2 ) O 22 | 806. RY (13) O 22         | 1.26  | 5.37  | 0.073 |
| 80. LP ( 2 ) O 22 | 819. RY (26) O 22         | 1.09  | 5.18  | 0.067 |
| 80. LP ( 2 ) O 22 | 1028. RY ( 1 ) C 31       | 1.07  | 1.77  | 0.039 |
| 80. LP ( 2 ) O 22 | 1029. RY ( 2 ) C 31       | 1.42  | 2.10  | 0.049 |
| 81. LP ( 1 ) O 23 | 201. BD*( 1 ) O 22- C 31  | 1.93  | 0.99  | 0.039 |
| 81. LP ( 1 ) O 23 | 215. BD*( 1 ) C 31- C 32  | 6.75  | 0.98  | 0.073 |
| 81. LP ( 1 ) O 23 | 821. RY ( 2 ) O 23        | 10.70 | 1.92  | 0.128 |
| 81. LP ( 1 ) O 23 | 822. RY ( 3 ) O 23        | 7.28  | 2.54  | 0.121 |
| 81. LP ( 1 ) O 23 | 824. RY ( 5 ) O 23        | 2.51  | 2.50  | 0.071 |
| 81. LP ( 1 ) O 23 | 827. RY ( 8 ) O 23        | 0.54  | 3.16  | 0.037 |
| 81. LP ( 1 ) O 23 | 828. RY ( 9 ) O 23        | 0.82  | 3.81  | 0.050 |
| 81. LP ( 1 ) O 23 | 830. RY (11) O 23         | 1.18  | 3.81  | 0.060 |
| 81. LP ( 1 ) O 23 | 834. RY (15) O 23         | 0.60  | 5.35  | 0.050 |
| 81. LP ( 1 ) O 23 | 838. RY (19) O 23         | 1.15  | 19.77 | 0.135 |
| 81. LP ( 1 ) O 23 | 843. RY (24) O 23         | 1.05  | 14.50 | 0.110 |
| 81. LP ( 1 ) O 23 | 1028. RY ( 1 ) C 31       | 1.24  | 2.00  | 0.044 |
| 81. LP ( 1 ) O 23 | 1029. RY ( 2 ) C 31       | 0.81  | 2.33  | 0.039 |
| 81. LP ( 1 ) O 23 | 1044. RY (17) C 31        | 0.70  | 2.60  | 0.038 |
| 82. LP ( 2 ) O 23 | 215. BD*( 1 ) C 31- C 32  | 1.10  | 0.78  | 0.026 |
| 82. LP ( 2 ) O 23 | 216. BD*( 1 ) C 31- H 61  | 6.37  | 0.87  | 0.066 |
| 82. LP ( 2 ) O 23 | 820. RY ( 1 ) O 23        | 27.69 | 1.52  | 0.183 |
| 82. LP ( 2 ) O 23 | 821. RY ( 2 ) O 23        | 0.94  | 1.72  | 0.036 |
| 82. LP ( 2 ) O 23 | 822. RY ( 3 ) O 23        | 1.74  | 2.34  | 0.057 |
| 82. LP ( 2 ) O 23 | 823. RY ( 4 ) O 23        | 1.08  | 2.50  | 0.046 |
| 82. LP ( 2 ) O 23 | 828. RY ( 9 ) O 23        | 1.64  | 3.61  | 0.069 |
| 82. LP ( 2 ) O 23 | 830. RY (11) O 23         | 1.05  | 3.61  | 0.055 |
| 82. LP ( 2 ) O 23 | 1030. RY ( 3 ) C 31       | 0.70  | 2.30  | 0.036 |
| 82. LP ( 2 ) O 23 | 1232. RY ( 1 ) H 55       | 0.53  | 1.66  | 0.027 |
| 82. LP ( 2 ) O 23 | 1233. RY ( 2 ) H 55       | 0.74  | 2.65  | 0.040 |
| 83. LP ( 1 ) O 24 | 156. LV ( 1 ) Sb 14       | 6.24  | 0.80  | 0.063 |
| 83. LP ( 1 ) O 24 | 204. BD*( 1 ) O 24- C 34  | 0.64  | 1.02  | 0.023 |
| 83. LP ( 1 ) O 24 | 219. BD*( 1 ) C 33- C 34  | 4.59  | 0.97  | 0.060 |
| 83. LP ( 1 ) O 24 | 847. RY ( 2 ) O 24        | 0.68  | 1.95  | 0.033 |
| 83. LP ( 1 ) O 24 | 848. RY ( 3 ) O 24        | 18.12 | 1.95  | 0.168 |
| 83. LP ( 1 ) O 24 | 850. RY ( 5 ) O 24        | 0.75  | 2.57  | 0.039 |
| 83. LP ( 1 ) O 24 | 855. RY (10) O 24         | 1.05  | 5.30  | 0.067 |

|                          |                           |       |       |       |
|--------------------------|---------------------------|-------|-------|-------|
| 83. LP ( 1) O 24         | 857. RY (12) O 24         | 1.48  | 4.62  | 0.074 |
| 83. LP ( 1) O 24         | 859. RY (14) O 24         | 1.20  | 5.32  | 0.071 |
| 83. LP ( 1) O 24         | 862. RY (17) O 24         | 1.33  | 32.85 | 0.187 |
| 83. LP ( 1) O 24         | 864. RY (19) O 24         | 0.78  | 7.26  | 0.067 |
| 83. LP ( 1) O 24         | 868. RY (23) O 24         | 0.64  | 10.15 | 0.072 |
| 83. LP ( 1) O 24         | 1107. RY ( 2) C 34        | 0.71  | 2.31  | 0.036 |
| 83. LP ( 1) O 24         | 1113. RY ( 8) C 34        | 0.82  | 2.94  | 0.044 |
| 84. LP ( 2) O 24         | 190. BD* ( 1) Sb 14- O 19 | 0.62  | 0.55  | 0.016 |
| 84. LP ( 2) O 24         | 219. BD* ( 1) C 33- C 34  | 0.75  | 0.68  | 0.020 |
| 84. LP ( 2) O 24         | 221. BD* ( 1) C 34- H 64  | 7.14  | 0.75  | 0.065 |
| 84. LP ( 2) O 24         | 846. RY ( 1) O 24         | 26.95 | 1.47  | 0.178 |
| 84. LP ( 2) O 24         | 847. RY ( 2) O 24         | 0.80  | 1.66  | 0.033 |
| 84. LP ( 2) O 24         | 849. RY ( 4) O 24         | 1.24  | 2.51  | 0.050 |
| 84. LP ( 2) O 24         | 860. RY (15) O 24         | 2.01  | 5.02  | 0.090 |
| 84. LP ( 2) O 24         | 1108. RY ( 3) C 34        | 0.98  | 2.27  | 0.042 |
| 84. LP ( 2) O 24         | 1109. RY ( 4) C 34        | 1.19  | 1.73  | 0.041 |
| 84. LP ( 2) O 24         | 1119. RY (14) C 34        | 0.63  | 3.46  | 0.042 |
| 85. LP ( 3) O 24         | 156. LV ( 1) Sb 14        | 30.05 | 0.64  | 0.123 |
| 85. LP ( 3) O 24         | 190. BD* ( 1) Sb 14- O 19 | 2.81  | 0.68  | 0.039 |
| 85. LP ( 3) O 24         | 191. BD* ( 1) Sb 14- O 25 | 7.50  | 0.70  | 0.064 |
| 85. LP ( 3) O 24         | 206. BD* ( 1) O 26- C 34  | 14.95 | 0.91  | 0.104 |
| 85. LP ( 3) O 24         | 219. BD* ( 1) C 33- C 34  | 3.16  | 0.81  | 0.045 |
| 85. LP ( 3) O 24         | 576. RY ( 2) Sb 14        | 2.13  | 2.21  | 0.061 |
| 85. LP ( 3) O 24         | 577. RY ( 3) Sb 14        | 1.56  | 2.08  | 0.051 |
| 85. LP ( 3) O 24         | 578. RY ( 4) Sb 14        | 0.73  | 1.56  | 0.030 |
| 85. LP ( 3) O 24         | 588. RY (14) Sb 14        | 1.81  | 1.85  | 0.052 |
| 85. LP ( 3) O 24         | 589. RY (15) Sb 14        | 1.19  | 1.83  | 0.042 |
| 85. LP ( 3) O 24         | 593. RY (19) Sb 14        | 0.54  | 2.47  | 0.033 |
| 85. LP ( 3) O 24         | 594. RY (20) Sb 14        | 1.66  | 2.97  | 0.063 |
| 85. LP ( 3) O 24         | 595. RY (21) Sb 14        | 0.50  | 2.22  | 0.030 |
| 85. LP ( 3) O 24         | 600. RY (26) Sb 14        | 0.95  | 4.10  | 0.056 |
| 85. LP ( 3) O 24         | 602. RY (28) Sb 14        | 0.58  | 4.95  | 0.048 |
| 85. LP ( 3) O 24         | 604. RY (30) Sb 14        | 1.98  | 14.61 | 0.152 |
| 85. LP ( 3) O 24         | 609. RY (35) Sb 14        | 0.72  | 13.84 | 0.089 |
| 85. LP ( 3) O 24         | 610. RY (36) Sb 14        | 2.39  | 18.77 | 0.189 |
| 85. LP ( 3) O 24         | 611. RY (37) Sb 14        | 2.36  | 16.25 | 0.175 |
| 85. LP ( 3) O 24         | 846. RY ( 1) O 24         | 0.62  | 1.60  | 0.028 |
| 85. LP ( 3) O 24         | 847. RY ( 2) O 24         | 15.80 | 1.79  | 0.150 |
| 85. LP ( 3) O 24         | 857. RY (12) O 24         | 0.58  | 4.46  | 0.045 |
| 85. LP ( 3) O 24         | 858. RY (13) O 24         | 0.53  | 5.01  | 0.046 |
| 85. LP ( 3) O 24         | 859. RY (14) O 24         | 1.13  | 5.16  | 0.068 |
| 85. LP ( 3) O 24         | 862. RY (17) O 24         | 1.01  | 32.69 | 0.162 |
| 85. LP ( 3) O 24         | 1106. RY ( 1) C 34        | 1.91  | 1.82  | 0.053 |
| 85. LP ( 3) O 24         | 1107. RY ( 2) C 34        | 2.42  | 2.15  | 0.064 |
| 85. LP ( 3) O 24         | 1111. RY ( 6) C 34        | 0.54  | 3.60  | 0.039 |
| 85. LP ( 3) O 24         | 1120. RY (15) C 34        | 0.67  | 2.72  | 0.038 |
| 86. LP ( 1) O 25         | 156. LV ( 1) Sb 14        | 0.81  | 0.80  | 0.023 |
| 86. LP ( 1) O 25         | 205. BD* ( 1) O 25- C 33  | 1.06  | 0.87  | 0.027 |
| 86. LP ( 1) O 25         | 219. BD* ( 1) C 33- C 34  | 2.34  | 0.98  | 0.043 |
| 86. LP ( 1) O 25         | 580. RY ( 6) Sb 14        | 0.52  | 2.05  | 0.029 |
| 86. LP ( 1) O 25         | 581. RY ( 7) Sb 14        | 0.52  | 2.09  | 0.029 |
| 86. LP ( 1) O 25         | 872. RY ( 1) O 25         | 1.81  | 2.08  | 0.055 |
| 86. LP ( 1) O 25         | 873. RY ( 2) O 25         | 7.89  | 1.94  | 0.110 |
| 86. LP ( 1) O 25         | 874. RY ( 3) O 25         | 6.89  | 2.23  | 0.111 |
| 86. LP ( 1) O 25         | 875. RY ( 4) O 25         | 0.65  | 2.38  | 0.035 |
| 86. LP ( 1) O 25         | 886. RY (15) O 25         | 1.07  | 5.96  | 0.071 |
| 86. LP ( 1) O 25         | 896. RY (25) O 25         | 1.25  | 5.68  | 0.075 |
| 86. LP ( 1) O 25         | 897. RY (26) O 25         | 1.20  | 35.74 | 0.185 |
| 86. LP ( 1) O 25         | 1081. RY ( 2) C 33        | 0.67  | 1.97  | 0.032 |
| 86. LP ( 1) O 25         | 1082. RY ( 3) C 33        | 0.72  | 2.18  | 0.035 |
| 86. LP ( 1) O 25         | 1085. RY ( 6) C 33        | 0.54  | 2.62  | 0.033 |
| 86. LP ( 1) O 25         | 1086. RY ( 7) C 33        | 0.62  | 2.80  | 0.037 |
| 87. LP ( 2) O 25         | 190. BD* ( 1) Sb 14- O 19 | 1.11  | 0.59  | 0.023 |
| 87. LP ( 2) O 25         | 217. BD* ( 1) C 32- C 33  | 2.70  | 0.71  | 0.039 |
| 87. LP ( 2) O 25         | 220. BD* ( 1) C 33- H 63  | 3.43  | 0.85  | 0.048 |
| 87. LP ( 2) O 25         | 575. RY ( 1) Sb 14        | 0.63  | 1.93  | 0.031 |
| 87. LP ( 2) O 25         | 579. RY ( 5) Sb 14        | 1.18  | 1.82  | 0.041 |
| 87. LP ( 2) O 25         | 872. RY ( 1) O 25         | 13.63 | 1.81  | 0.140 |
| 87. LP ( 2) O 25         | 873. RY ( 2) O 25         | 7.53  | 1.67  | 0.100 |
| 87. LP ( 2) O 25         | 884. RY (13) O 25         | 1.12  | 5.01  | 0.067 |
| 87. LP ( 2) O 25         | 885. RY (14) O 25         | 1.32  | 5.56  | 0.076 |
| 87. LP ( 2) O 25         | 1081. RY ( 2) C 33        | 0.68  | 1.70  | 0.030 |
| 87. LP ( 2) O 25         | 1082. RY ( 3) C 33        | 1.63  | 1.91  | 0.050 |
| 88. LP ( 1) O 26         | 204. BD* ( 1) O 24- C 34  | 1.83  | 1.01  | 0.038 |
| 88. LP ( 1) O 26         | 219. BD* ( 1) C 33- C 34  | 6.45  | 0.96  | 0.070 |
| 88. LP ( 1) O 26         | 899. RY ( 2) O 26         | 11.66 | 1.91  | 0.133 |
| 88. LP ( 1) O 26         | 900. RY ( 3) O 26         | 4.50  | 2.89  | 0.102 |
| 88. LP ( 1) O 26         | 902. RY ( 5) O 26         | 2.30  | 2.68  | 0.070 |
| 88. LP ( 1) O 26         | 904. RY ( 7) O 26         | 0.63  | 3.64  | 0.043 |
| 88. LP ( 1) O 26         | 906. RY ( 9) O 26         | 0.86  | 3.69  | 0.050 |
| 88. LP ( 1) O 26         | 907. RY (10) O 26         | 1.40  | 3.69  | 0.064 |
| 88. LP ( 1) O 26         | 910. RY (13) O 26         | 0.88  | 4.33  | 0.055 |
| 88. LP ( 1) O 26         | 915. RY (18) O 26         | 0.57  | 9.89  | 0.067 |
| 88. LP ( 1) O 26         | 918. RY (21) O 26         | 1.29  | 15.97 | 0.128 |
| 88. LP ( 1) O 26         | 922. RY (25) O 26         | 0.67  | 9.95  | 0.073 |
| 88. LP ( 1) O 26         | 1106. RY ( 1) C 34        | 1.02  | 1.97  | 0.040 |
| 88. LP ( 1) O 26         | 1108. RY ( 3) C 34        | 0.57  | 2.55  | 0.034 |
| 88. LP ( 1) O 26         | 1116. RY (11) C 34        | 0.66  | 2.70  | 0.038 |
| 89. LP ( 2) O 26         | 219. BD* ( 1) C 33- C 34  | 0.78  | 0.76  | 0.022 |
| 89. LP ( 2) O 26         | 221. BD* ( 1) C 34- H 64  | 7.55  | 0.83  | 0.071 |
| 89. LP ( 2) O 26         | 898. RY ( 1) O 26         | 24.18 | 1.52  | 0.171 |
| 89. LP ( 2) O 26         | 899. RY ( 2) O 26         | 0.82  | 1.71  | 0.033 |
| 89. LP ( 2) O 26         | 900. RY ( 3) O 26         | 1.53  | 2.69  | 0.057 |
| 89. LP ( 2) O 26         | 901. RY ( 4) O 26         | 2.34  | 2.52  | 0.068 |
| 89. LP ( 2) O 26         | 902. RY ( 5) O 26         | 0.70  | 2.48  | 0.037 |
| 89. LP ( 2) O 26         | 903. RY ( 6) O 26         | 0.75  | 2.28  | 0.037 |
| 89. LP ( 2) O 26         | 909. RY (12) O 26         | 2.25  | 3.91  | 0.084 |
| 89. LP ( 2) O 26         | 1109. RY ( 4) C 34        | 1.53  | 1.81  | 0.047 |
| 89. LP ( 2) O 26         | 1117. RY (12) C 34        | 0.64  | 3.11  | 0.040 |
| 89. LP ( 2) O 26         | 1238. RY ( 2) H 56        | 1.14  | 2.53  | 0.048 |
| 120. BD ( 1) Sb 13- O 16 | 187. BD* ( 1) Sb 13- O 16 | 15.13 | 0.79  | 0.098 |
| 120. BD ( 1) Sb 13- O 16 | 188. BD* ( 1) Sb 13- O 21 | 1.41  | 0.80  | 0.030 |
| 120. BD ( 1) Sb 13- O 16 | 193. BD* ( 1) O 16- C 28  | 0.66  | 0.79  | 0.020 |

|      |    |        |     |   |    |       |     |        |     |   |    |       |       |       |
|------|----|--------|-----|---|----|-------|-----|--------|-----|---|----|-------|-------|-------|
| 120. | BD | ( 1)Sb | 13- | O | 16 | 208.  | BD* | ( 1) C | 27- | C | 28 | 0.94  | 0.93  | 0.026 |
| 120. | BD | ( 1)Sb | 13- | O | 16 | 210.  | BD* | ( 1) C | 28- | C | 29 | 1.70  | 0.94  | 0.036 |
| 120. | BD | ( 1)Sb | 13- | O | 16 | 559.  | RY  | (22)Sb | 13  |   |    | 0.51  | 2.97  | 0.035 |
| 120. | BD | ( 1)Sb | 13- | O | 16 | 638.  | RY  | ( 1) O | 16  |   |    | 1.29  | 1.91  | 0.044 |
| 120. | BD | ( 1)Sb | 13- | O | 16 | 639.  | RY  | ( 2) O | 16  |   |    | 2.03  | 1.79  | 0.054 |
| 120. | BD | ( 1)Sb | 13- | O | 16 | 640.  | RY  | ( 3) O | 16  |   |    | 4.27  | 1.99  | 0.082 |
| 120. | BD | ( 1)Sb | 13- | O | 16 | 649.  | RY  | (12) O | 16  |   |    | 0.59  | 4.99  | 0.049 |
| 120. | BD | ( 1)Sb | 13- | O | 16 | 950.  | RY  | ( 1) C | 28  |   |    | 0.75  | 1.72  | 0.032 |
| 120. | BD | ( 1)Sb | 13- | O | 16 | 952.  | RY  | ( 3) C | 28  |   |    | 1.16  | 2.06  | 0.044 |
| 120. | BD | ( 1)Sb | 13- | O | 16 | 1257. | RY  | ( 1) H | 60  |   |    | 0.84  | 2.36  | 0.040 |
| 121. | BD | ( 1)Sb | 13- | O | 21 | 187.  | BD* | ( 1)Sb | 13- | O | 16 | 1.59  | 0.79  | 0.032 |
| 121. | BD | ( 1)Sb | 13- | O | 21 | 188.  | BD* | ( 1)Sb | 13- | O | 21 | 14.66 | 0.79  | 0.096 |
| 121. | BD | ( 1)Sb | 13- | O | 21 | 189.  | BD* | ( 1)Sb | 13- | O | 22 | 2.86  | 0.78  | 0.042 |
| 121. | BD | ( 1)Sb | 13- | O | 21 | 200.  | BD* | ( 1) O | 21- | C | 32 | 0.65  | 0.79  | 0.020 |
| 121. | BD | ( 1)Sb | 13- | O | 21 | 215.  | BD* | ( 1) C | 31- | C | 32 | 0.80  | 0.94  | 0.024 |
| 121. | BD | ( 1)Sb | 13- | O | 21 | 217.  | BD* | ( 1) C | 32- | C | 33 | 1.01  | 0.92  | 0.027 |
| 121. | BD | ( 1)Sb | 13- | O | 21 | 559.  | RY  | (22)Sb | 13  |   |    | 0.89  | 2.97  | 0.046 |
| 121. | BD | ( 1)Sb | 13- | O | 21 | 768.  | RY  | ( 1) O | 21  |   |    | 0.98  | 1.94  | 0.039 |
| 121. | BD | ( 1)Sb | 13- | O | 21 | 769.  | RY  | ( 2) O | 21  |   |    | 1.79  | 1.84  | 0.051 |
| 121. | BD | ( 1)Sb | 13- | O | 21 | 770.  | RY  | ( 3) O | 21  |   |    | 3.25  | 1.98  | 0.072 |
| 121. | BD | ( 1)Sb | 13- | O | 21 | 771.  | RY  | ( 4) O | 21  |   |    | 0.99  | 2.06  | 0.040 |
| 121. | BD | ( 1)Sb | 13- | O | 21 | 775.  | RY  | ( 8) O | 21  |   |    | 0.56  | 4.51  | 0.045 |
| 121. | BD | ( 1)Sb | 13- | O | 21 | 779.  | RY  | (12) O | 21  |   |    | 0.53  | 5.13  | 0.047 |
| 121. | BD | ( 1)Sb | 13- | O | 21 | 1054. | RY  | ( 1) C | 32  |   |    | 3.14  | 1.91  | 0.069 |
| 122. | BD | ( 1)Sb | 13- | O | 22 | 187.  | BD* | ( 1)Sb | 13- | O | 16 | 0.63  | 0.61  | 0.017 |
| 122. | BD | ( 1)Sb | 13- | O | 22 | 188.  | BD* | ( 1)Sb | 13- | O | 21 | 1.17  | 0.62  | 0.024 |
| 122. | BD | ( 1)Sb | 13- | O | 22 | 189.  | BD* | ( 1)Sb | 13- | O | 22 | 8.47  | 0.60  | 0.064 |
| 122. | BD | ( 1)Sb | 13- | O | 22 | 201.  | BD* | ( 1) O | 22- | C | 31 | 1.88  | 0.77  | 0.034 |
| 122. | BD | ( 1)Sb | 13- | O | 22 | 202.  | BD* | ( 1) O | 23- | C | 31 | 4.14  | 0.86  | 0.053 |
| 122. | BD | ( 1)Sb | 13- | O | 22 | 215.  | BD* | ( 1) C | 31- | C | 32 | 2.86  | 0.76  | 0.042 |
| 122. | BD | ( 1)Sb | 13- | O | 22 | 216.  | BD* | ( 1) C | 31- | H | 61 | 3.04  | 0.84  | 0.045 |
| 122. | BD | ( 1)Sb | 13- | O | 22 | 543.  | RY  | ( 6)Sb | 13  |   |    | 0.72  | 1.71  | 0.031 |
| 122. | BD | ( 1)Sb | 13- | O | 22 | 551.  | RY  | (14)Sb | 13  |   |    | 0.54  | 1.82  | 0.028 |
| 122. | BD | ( 1)Sb | 13- | O | 22 | 560.  | RY  | (23)Sb | 13  |   |    | 0.86  | 2.58  | 0.042 |
| 122. | BD | ( 1)Sb | 13- | O | 22 | 794.  | RY  | ( 1) O | 22  |   |    | 6.69  | 1.52  | 0.090 |
| 122. | BD | ( 1)Sb | 13- | O | 22 | 795.  | RY  | ( 2) O | 22  |   |    | 9.85  | 1.71  | 0.116 |
| 122. | BD | ( 1)Sb | 13- | O | 22 | 796.  | RY  | ( 3) O | 22  |   |    | 0.70  | 1.65  | 0.030 |
| 122. | BD | ( 1)Sb | 13- | O | 22 | 797.  | RY  | ( 4) O | 22  |   |    | 1.18  | 2.50  | 0.049 |
| 122. | BD | ( 1)Sb | 13- | O | 22 | 819.  | RY  | (26) O | 22  |   |    | 1.04  | 5.19  | 0.066 |
| 122. | BD | ( 1)Sb | 13- | O | 22 | 1028. | RY  | ( 1) C | 31  |   |    | 1.13  | 1.78  | 0.040 |
| 122. | BD | ( 1)Sb | 13- | O | 22 | 1029. | RY  | ( 2) C | 31  |   |    | 0.99  | 2.11  | 0.041 |
| 122. | BD | ( 1)Sb | 13- | O | 22 | 1030. | RY  | ( 3) C | 31  |   |    | 0.66  | 2.28  | 0.035 |
| 122. | BD | ( 1)Sb | 13- | O | 22 | 1042. | RY  | (15) C | 31  |   |    | 0.70  | 2.95  | 0.041 |
| 123. | BD | ( 1)Sb | 14- | O | 19 | 190.  | BD* | ( 1)Sb | 14- | O | 19 | 13.94 | 0.80  | 0.094 |
| 123. | BD | ( 1)Sb | 14- | O | 19 | 191.  | BD* | ( 1)Sb | 14- | O | 25 | 1.31  | 0.81  | 0.029 |
| 123. | BD | ( 1)Sb | 14- | O | 19 | 197.  | BD* | ( 1) O | 19- | C | 29 | 0.52  | 0.84  | 0.019 |
| 123. | BD | ( 1)Sb | 14- | O | 19 | 210.  | BD* | ( 1) C | 28- | C | 29 | 1.34  | 0.94  | 0.032 |
| 123. | BD | ( 1)Sb | 14- | O | 19 | 212.  | BD* | ( 1) C | 29- | C | 30 | 1.30  | 0.92  | 0.031 |
| 123. | BD | ( 1)Sb | 14- | O | 19 | 213.  | BD* | ( 1) C | 29- | H | 59 | 0.65  | 1.05  | 0.023 |
| 123. | BD | ( 1)Sb | 14- | O | 19 | 576.  | RY  | ( 2)Sb | 14  |   |    | 0.65  | 2.32  | 0.035 |
| 123. | BD | ( 1)Sb | 14- | O | 19 | 595.  | RY  | (21)Sb | 14  |   |    | 0.56  | 2.34  | 0.032 |
| 123. | BD | ( 1)Sb | 14- | O | 19 | 597.  | RY  | (23)Sb | 14  |   |    | 0.53  | 2.53  | 0.033 |
| 123. | BD | ( 1)Sb | 14- | O | 19 | 716.  | RY  | ( 1) O | 19  |   |    | 0.98  | 1.97  | 0.039 |
| 123. | BD | ( 1)Sb | 14- | O | 19 | 717.  | RY  | ( 2) O | 19  |   |    | 1.59  | 1.92  | 0.049 |
| 123. | BD | ( 1)Sb | 14- | O | 19 | 718.  | RY  | ( 3) O | 19  |   |    | 3.86  | 2.07  | 0.080 |
| 123. | BD | ( 1)Sb | 14- | O | 19 | 719.  | RY  | ( 4) O | 19  |   |    | 0.61  | 2.15  | 0.032 |
| 123. | BD | ( 1)Sb | 14- | O | 19 | 727.  | RY  | (12) O | 19  |   |    | 0.67  | 5.09  | 0.052 |
| 123. | BD | ( 1)Sb | 14- | O | 19 | 976.  | RY  | ( 1) C | 29  |   |    | 3.34  | 1.98  | 0.073 |
| 124. | BD | ( 1)Sb | 14- | O | 25 | 190.  | BD* | ( 1)Sb | 14- | O | 19 | 1.49  | 0.83  | 0.031 |
| 124. | BD | ( 1)Sb | 14- | O | 25 | 191.  | BD* | ( 1)Sb | 14- | O | 25 | 13.72 | 0.84  | 0.096 |
| 124. | BD | ( 1)Sb | 14- | O | 25 | 205.  | BD* | ( 1) O | 25- | C | 33 | 0.54  | 0.84  | 0.019 |
| 124. | BD | ( 1)Sb | 14- | O | 25 | 217.  | BD* | ( 1) C | 32- | C | 33 | 1.89  | 0.94  | 0.038 |
| 124. | BD | ( 1)Sb | 14- | O | 25 | 219.  | BD* | ( 1) C | 33- | C | 34 | 0.97  | 0.95  | 0.027 |
| 124. | BD | ( 1)Sb | 14- | O | 25 | 717.  | RY  | ( 2) O | 19  |   |    | 0.51  | 1.95  | 0.028 |
| 124. | BD | ( 1)Sb | 14- | O | 25 | 872.  | RY  | ( 1) O | 25  |   |    | 0.95  | 2.05  | 0.039 |
| 124. | BD | ( 1)Sb | 14- | O | 25 | 873.  | RY  | ( 2) O | 25  |   |    | 1.36  | 1.91  | 0.045 |
| 124. | BD | ( 1)Sb | 14- | O | 25 | 874.  | RY  | ( 3) O | 25  |   |    | 3.74  | 2.21  | 0.081 |
| 124. | BD | ( 1)Sb | 14- | O | 25 | 879.  | RY  | ( 8) O | 25  |   |    | 0.58  | 3.48  | 0.040 |
| 124. | BD | ( 1)Sb | 14- | O | 25 | 883.  | RY  | (12) O | 25  |   |    | 0.58  | 5.08  | 0.049 |
| 124. | BD | ( 1)Sb | 14- | O | 25 | 1080. | RY  | ( 1) C | 33  |   |    | 1.46  | 1.78  | 0.046 |
| 124. | BD | ( 1)Sb | 14- | O | 25 | 1082. | RY  | ( 3) C | 33  |   |    | 1.21  | 2.15  | 0.046 |
| 124. | BD | ( 1)Sb | 14- | O | 25 | 1262. | RY  | ( 1) H | 61  |   |    | 0.75  | 2.29  | 0.037 |
| 125. | BD | ( 1) O | 15- | C | 27 | 189.  | BD* | ( 1)Sb | 13- | O | 22 | 1.72  | 1.15  | 0.040 |
| 125. | BD | ( 1) O | 15- | C | 27 | 192.  | BD* | ( 1) O | 15- | C | 27 | 6.18  | 1.38  | 0.082 |
| 125. | BD | ( 1) O | 15- | C | 27 | 194.  | BD* | ( 1) O | 17- | C | 27 | 0.74  | 1.38  | 0.028 |
| 125. | BD | ( 1) O | 15- | C | 27 | 195.  | BD* | ( 1) O | 17- | H | 53 | 0.79  | 1.37  | 0.029 |
| 125. | BD | ( 1) O | 15- | C | 27 | 628.  | RY  | (17) O | 15  |   |    | 0.50  | 23.26 | 0.096 |
| 125. | BD | ( 1) O | 15- | C | 27 | 924.  | RY  | ( 1) C | 27  |   |    | 1.99  | 2.29  | 0.060 |
| 125. | BD | ( 1) O | 15- | C | 27 | 925.  | RY  | ( 2) C | 27  |   |    | 2.29  | 2.66  | 0.070 |
| 126. | BD | ( 1) O | 16- | C | 28 | 193.  | BD* | ( 1) O | 16- | C | 28 | 9.80  | 0.99  | 0.088 |
| 126. | BD | ( 1) O | 16- | C | 28 | 194.  | BD* | ( 1) O | 17- | C | 27 | 1.18  | 1.20  | 0.034 |
| 126. | BD | ( 1) O | 16- | C | 28 | 213.  | BD* | ( 1) C | 29- | H | 59 | 0.62  | 1.25  | 0.025 |
| 126. | BD | ( 1) O | 16- | C | 28 | 546.  | RY  | ( 9)Sb | 13  |   |    | 0.59  | 2.27  | 0.033 |
| 126. | BD | ( 1) O | 16- | C | 28 | 547.  | RY  | (10)Sb | 13  |   |    | 0.53  | 2.06  | 0.029 |
| 126. | BD | ( 1) O | 16- | C | 28 | 639.  | RY  | ( 2) O | 16  |   |    | 0.58  | 1.98  | 0.030 |
| 126. | BD | ( 1) O | 16- | C | 28 | 641.  | RY  | ( 4) O | 16  |   |    | 0.74  | 2.47  | 0.038 |
| 126. | BD | ( 1) O | 16- | C | 28 | 951.  | RY  | ( 2) C | 28  |   |    | 2.39  | 2.11  | 0.063 |
| 126. | BD | ( 1) O | 16- | C | 28 | 952.  | RY  | ( 3) C | 28  |   |    | 1.29  | 2.26  | 0.048 |
| 126. | BD | ( 1) O | 16- | C | 28 | 957.  | RY  | ( 8) C | 28  |   |    | 0.69  | 3.10  | 0.041 |
| 126. | BD | ( 1) O | 16- | C | 28 | 960.  | RY  | (11) C | 28  |   |    | 0.61  | 3.70  | 0.043 |
| 127. | BD | ( 1) O | 17- | C | 27 | 192.  | BD* | ( 1) O | 15- | C | 27 | 0.72  | 1.45  | 0.029 |
| 127. | BD | ( 1) O | 17- | C | 27 | 194.  | BD* | ( 1) O | 17- | C | 27 | 6.66  | 1.46  | 0.088 |
| 127. | BD | ( 1) O | 17- | C | 27 | 666.  | RY  | ( 3) O | 17  |   |    | 0.51  | 3.33  | 0.037 |
| 127. | BD | ( 1) O | 17- | C | 27 | 680.  | RY  | (17) O | 17  |   |    | 0.71  | 5.22  | 0.054 |
| 127. | BD | ( 1) O | 17- | C | 27 | 683.  | RY  | (20) O | 17  |   |    | 0.51  | 15.74 | 0.080 |
| 127. | BD | ( 1) O | 17- | C | 27 | 688.  | RY  | (25) O | 17  |   |    | 0.60  | 10.51 | 0.071 |
| 127. | BD | ( 1) O | 17- | C | 27 | 924.  | RY  | ( 1) C | 27  |   |    | 1.66  | 2.37  | 0.056 |
| 127. | BD | ( 1) O | 17- | C | 27 | 925.  | RY  | ( 2) C | 27  |   |    | 0.91  | 2.74  | 0.045 |
| 127. | BD | ( 1) O | 17- | C | 27 | 929.  | RY  | ( 6) C | 27  |   |    | 0.66  | 4.17  | 0.047 |
| 128. | BD | ( 1) O | 17- | H | 53 | 192.  | BD* | ( 1) O | 15- | C | 27 | 8.30  | 1.17  | 0.088 |
| 128. | BD | ( 1) O | 17- | H | 53 | 195.  | BD* | ( 1) O | 17- | H | 53 | 20.55 | 1.17  | 0.138 |
| 128. | BD | ( 1) O | 17- | H | 53 | 208.  | BD* | ( 1) C | 27- | C | 28 | 0.58  | 1.10  | 0.022 |
| 128. | BD | ( 1) O | 17- | H | 53 | 665.  | RY  | ( 2) O | 17  |   |    | 1.03  | 2.04  | 0.041 |

|                        |                          |       |       |       |
|------------------------|--------------------------|-------|-------|-------|
| 128. BD (1) O 17- H 53 | 671. RY (8) O 17         | 3.08  | 3.46  | 0.092 |
| 128. BD (1) O 17- H 53 | 924. RY (1) C 27         | 3.83  | 2.09  | 0.080 |
| 128. BD (1) O 17- H 53 | 930. RY (7) C 27         | 0.72  | 3.94  | 0.047 |
| 128. BD (1) O 17- H 53 | 1222. RY (1) H 53        | 1.39  | 1.97  | 0.047 |
| 128. BD (1) O 17- H 53 | 1225. RY (4) H 53        | 1.27  | 3.12  | 0.056 |
| 129. BD (1) O 18- C 30 | 156. LV (1) Sb 14        | 1.93  | 1.04  | 0.040 |
| 129. BD (1) O 18- C 30 | 196. BD* (1) O 18- C 30  | 6.11  | 1.21  | 0.077 |
| 129. BD (1) O 18- C 30 | 198. BD* (1) O 20- C 30  | 0.51  | 1.33  | 0.023 |
| 129. BD (1) O 18- C 30 | 199. BD* (1) O 20- H 54  | 1.04  | 1.28  | 0.033 |
| 129. BD (1) O 18- C 30 | 578. RY (4) Sb 14        | 0.66  | 1.96  | 0.032 |
| 129. BD (1) O 18- C 30 | 1002. RY (1) C 30        | 0.76  | 2.26  | 0.037 |
| 129. BD (1) O 18- C 30 | 1003. RY (2) C 30        | 3.54  | 2.56  | 0.085 |
| 130. BD (1) O 19- C 29 | 197. BD* (1) O 19- C 29  | 9.34  | 1.08  | 0.090 |
| 130. BD (1) O 19- C 29 | 198. BD* (1) O 20- C 30  | 1.01  | 1.27  | 0.032 |
| 130. BD (1) O 19- C 29 | 578. RY (4) Sb 14        | 0.58  | 1.91  | 0.030 |
| 130. BD (1) O 19- C 29 | 583. RY (9) Sb 14        | 1.11  | 2.35  | 0.046 |
| 130. BD (1) O 19- C 29 | 719. RY (4) O 19         | 0.88  | 2.39  | 0.041 |
| 130. BD (1) O 19- C 29 | 846. RY (1) O 24         | 0.50  | 1.96  | 0.028 |
| 130. BD (1) O 19- C 29 | 976. RY (1) C 29         | 3.52  | 2.22  | 0.079 |
| 130. BD (1) O 19- C 29 | 978. RY (3) C 29         | 0.53  | 2.38  | 0.032 |
| 131. BD (1) O 20- C 30 | 196. BD* (1) O 18- C 30  | 0.59  | 1.41  | 0.026 |
| 131. BD (1) O 20- C 30 | 198. BD* (1) O 20- C 30  | 7.04  | 1.52  | 0.092 |
| 131. BD (1) O 20- C 30 | 744. RY (3) O 20         | 0.51  | 2.97  | 0.035 |
| 131. BD (1) O 20- C 30 | 766. RY (25) O 20        | 0.59  | 14.45 | 0.083 |
| 131. BD (1) O 20- C 30 | 1002. RY (1) C 30        | 2.24  | 2.46  | 0.066 |
| 131. BD (1) O 20- C 30 | 1013. RY (12) C 30       | 0.65  | 3.00  | 0.039 |
| 132. BD (1) O 20- H 54 | 196. BD* (1) O 18- C 30  | 9.33  | 1.11  | 0.091 |
| 132. BD (1) O 20- H 54 | 199. BD* (1) O 20- H 54  | 20.40 | 1.17  | 0.138 |
| 132. BD (1) O 20- H 54 | 212. BD* (1) C 29- C 30  | 0.72  | 1.10  | 0.025 |
| 132. BD (1) O 20- H 54 | 743. RY (2) O 20         | 1.18  | 2.07  | 0.044 |
| 132. BD (1) O 20- H 54 | 748. RY (7) O 20         | 0.73  | 3.97  | 0.048 |
| 132. BD (1) O 20- H 54 | 750. RY (9) O 20         | 2.06  | 3.42  | 0.075 |
| 132. BD (1) O 20- H 54 | 1002. RY (1) C 30        | 4.58  | 2.15  | 0.089 |
| 132. BD (1) O 20- H 54 | 1005. RY (4) C 30        | 0.88  | 3.10  | 0.047 |
| 132. BD (1) O 20- H 54 | 1007. RY (6) C 30        | 0.66  | 3.89  | 0.045 |
| 132. BD (1) O 20- H 54 | 1227. RY (1) H 54        | 0.79  | 1.88  | 0.034 |
| 132. BD (1) O 20- H 54 | 1229. RY (3) H 54        | 0.55  | 3.02  | 0.036 |
| 132. BD (1) O 20- H 54 | 1230. RY (4) H 54        | 1.17  | 3.09  | 0.054 |
| 133. BD (1) O 21- C 32 | 200. BD* (1) O 21- C 32  | 10.27 | 0.97  | 0.089 |
| 133. BD (1) O 21- C 32 | 202. BD* (1) O 23- C 31  | 1.43  | 1.21  | 0.037 |
| 133. BD (1) O 21- C 32 | 220. BD* (1) C 33- H 63  | 0.51  | 1.24  | 0.022 |
| 133. BD (1) O 21- C 32 | 541. RY (4) Sb 13        | 0.55  | 1.90  | 0.029 |
| 133. BD (1) O 21- C 32 | 546. RY (9) Sb 13        | 0.79  | 2.25  | 0.038 |
| 133. BD (1) O 21- C 32 | 612. RY (1) O 15         | 0.52  | 1.89  | 0.028 |
| 133. BD (1) O 21- C 32 | 769. RY (2) O 21         | 0.58  | 2.02  | 0.031 |
| 133. BD (1) O 21- C 32 | 771. RY (4) O 21         | 1.29  | 2.24  | 0.048 |
| 133. BD (1) O 21- C 32 | 1054. RY (1) C 32        | 2.60  | 2.09  | 0.066 |
| 133. BD (1) O 21- C 32 | 1055. RY (2) C 32        | 1.02  | 2.17  | 0.042 |
| 133. BD (1) O 21- C 32 | 1056. RY (3) C 32        | 0.53  | 2.30  | 0.031 |
| 133. BD (1) O 21- C 32 | 1058. RY (5) C 32        | 0.58  | 2.63  | 0.035 |
| 134. BD (1) O 22- C 31 | 189. BD* (1) Sb 13- O 22 | 0.79  | 1.11  | 0.027 |
| 134. BD (1) O 22- C 31 | 201. BD* (1) O 22- C 31  | 7.34  | 1.29  | 0.087 |
| 134. BD (1) O 22- C 31 | 203. BD* (1) O 23- H 55  | 0.99  | 1.33  | 0.032 |
| 134. BD (1) O 22- C 31 | 1028. RY (1) C 31        | 1.12  | 2.29  | 0.045 |
| 134. BD (1) O 22- C 31 | 1029. RY (2) C 31        | 3.22  | 2.62  | 0.082 |
| 135. BD (1) O 23- C 31 | 201. BD* (1) O 22- C 31  | 0.88  | 1.44  | 0.032 |
| 135. BD (1) O 23- C 31 | 202. BD* (1) O 23- C 31  | 6.83  | 1.52  | 0.091 |
| 135. BD (1) O 23- C 31 | 838. RY (19) O 23        | 0.65  | 20.21 | 0.103 |
| 135. BD (1) O 23- C 31 | 843. RY (24) O 23        | 0.62  | 14.95 | 0.086 |
| 135. BD (1) O 23- C 31 | 1028. RY (1) C 31        | 2.05  | 2.44  | 0.063 |
| 135. BD (1) O 23- C 31 | 1032. RY (5) C 31        | 0.52  | 3.95  | 0.041 |
| 135. BD (1) O 23- C 31 | 1042. RY (15) C 31       | 0.51  | 3.62  | 0.038 |
| 136. BD (1) O 23- H 55 | 201. BD* (1) O 22- C 31  | 9.36  | 1.13  | 0.092 |
| 136. BD (1) O 23- H 55 | 203. BD* (1) O 23- H 55  | 20.49 | 1.17  | 0.138 |
| 136. BD (1) O 23- H 55 | 215. BD* (1) C 31- C 32  | 0.61  | 1.12  | 0.023 |
| 136. BD (1) O 23- H 55 | 821. RY (2) O 23         | 1.19  | 2.06  | 0.044 |
| 136. BD (1) O 23- H 55 | 823. RY (4) O 23         | 0.53  | 2.84  | 0.035 |
| 136. BD (1) O 23- H 55 | 825. RY (6) O 23         | 0.94  | 2.87  | 0.046 |
| 136. BD (1) O 23- H 55 | 828. RY (9) O 23         | 1.07  | 3.95  | 0.058 |
| 136. BD (1) O 23- H 55 | 1028. RY (1) C 31        | 4.72  | 2.14  | 0.090 |
| 136. BD (1) O 23- H 55 | 1033. RY (6) C 31        | 0.62  | 3.87  | 0.044 |
| 136. BD (1) O 23- H 55 | 1232. RY (1) H 55        | 0.69  | 2.00  | 0.033 |
| 136. BD (1) O 23- H 55 | 1233. RY (2) H 55        | 0.60  | 2.98  | 0.038 |
| 136. BD (1) O 23- H 55 | 1234. RY (3) H 55        | 0.52  | 3.04  | 0.036 |
| 136. BD (1) O 23- H 55 | 1235. RY (4) H 55        | 1.06  | 3.03  | 0.051 |
| 137. BD (1) O 24- C 34 | 156. LV (1) Sb 14        | 2.16  | 1.09  | 0.043 |
| 137. BD (1) O 24- C 34 | 204. BD* (1) O 24- C 34  | 6.16  | 1.31  | 0.080 |
| 137. BD (1) O 24- C 34 | 206. BD* (1) O 26- C 34  | 0.62  | 1.36  | 0.026 |
| 137. BD (1) O 24- C 34 | 207. BD* (1) O 26- H 56  | 0.96  | 1.33  | 0.032 |
| 137. BD (1) O 24- C 34 | 578. RY (4) Sb 14        | 0.69  | 2.01  | 0.033 |
| 137. BD (1) O 24- C 34 | 1106. RY (1) C 34        | 1.22  | 2.28  | 0.047 |
| 137. BD (1) O 24- C 34 | 1107. RY (2) C 34        | 2.61  | 2.61  | 0.074 |
| 137. BD (1) O 24- C 34 | 1109. RY (4) C 34        | 0.54  | 2.31  | 0.031 |
| 137. BD (1) O 24- C 34 | 1118. RY (13) C 34       | 0.57  | 3.62  | 0.041 |
| 138. BD (1) O 25- C 33 | 205. BD* (1) O 25- C 33  | 9.28  | 1.05  | 0.088 |
| 138. BD (1) O 25- C 33 | 206. BD* (1) O 26- C 34  | 1.15  | 1.26  | 0.034 |
| 138. BD (1) O 25- C 33 | 584. RY (10) Sb 14       | 0.99  | 2.27  | 0.042 |
| 138. BD (1) O 25- C 33 | 875. RY (4) O 25         | 0.58  | 2.57  | 0.034 |
| 138. BD (1) O 25- C 33 | 1080. RY (1) C 33        | 0.69  | 1.99  | 0.033 |
| 138. BD (1) O 25- C 33 | 1081. RY (2) C 33        | 0.90  | 2.15  | 0.039 |
| 138. BD (1) O 25- C 33 | 1082. RY (3) C 33        | 2.32  | 2.36  | 0.066 |
| 138. BD (1) O 25- C 33 | 1087. RY (8) C 33        | 0.83  | 3.44  | 0.048 |
| 138. BD (1) O 25- C 33 | 1090. RY (11) C 33       | 0.64  | 3.74  | 0.044 |
| 139. BD (1) O 26- C 34 | 204. BD* (1) O 24- C 34  | 0.61  | 1.45  | 0.026 |
| 139. BD (1) O 26- C 34 | 206. BD* (1) O 26- C 34  | 6.74  | 1.49  | 0.090 |
| 139. BD (1) O 26- C 34 | 904. RY (7) O 26         | 0.52  | 4.08  | 0.041 |
| 139. BD (1) O 26- C 34 | 910. RY (13) O 26        | 0.52  | 4.77  | 0.044 |
| 139. BD (1) O 26- C 34 | 918. RY (21) O 26        | 0.62  | 16.41 | 0.090 |
| 139. BD (1) O 26- C 34 | 922. RY (25) O 26        | 0.50  | 10.39 | 0.064 |
| 139. BD (1) O 26- C 34 | 1106. RY (1) C 34        | 2.03  | 2.41  | 0.062 |
| 139. BD (1) O 26- C 34 | 1107. RY (2) C 34        | 0.55  | 2.74  | 0.035 |
| 139. BD (1) O 26- C 34 | 1111. RY (6) C 34        | 0.61  | 4.18  | 0.045 |
| 139. BD (1) O 26- C 34 | 1118. RY (13) C 34       | 0.69  | 3.76  | 0.045 |

|      |    |       |       |      |       |     |       |        |      |       |      |       |
|------|----|-------|-------|------|-------|-----|-------|--------|------|-------|------|-------|
| 140. | BD | ( 1 ) | O 26- | H 56 | 204.  | BD* | ( 1 ) | O 24-  | C 34 | 8.96  | 1.15 | 0.090 |
| 140. | BD | ( 1 ) | O 26- | H 56 | 207.  | BD* | ( 1 ) | O 26-  | H 56 | 20.65 | 1.16 | 0.138 |
| 140. | BD | ( 1 ) | O 26- | H 56 | 219.  | BD* | ( 1 ) | C 33-  | C 34 | 0.59  | 1.10 | 0.023 |
| 140. | BD | ( 1 ) | O 26- | H 56 | 899.  | RY  | ( 2 ) | O 26   |      | 1.04  | 2.05 | 0.041 |
| 140. | BD | ( 1 ) | O 26- | H 56 | 903.  | RY  | ( 6 ) | O 26   |      | 0.63  | 2.62 | 0.036 |
| 140. | BD | ( 1 ) | O 26- | H 56 | 905.  | RY  | ( 8 ) | O 26   |      | 0.73  | 4.51 | 0.051 |
| 140. | BD | ( 1 ) | O 26- | H 56 | 906.  | RY  | ( 9 ) | O 26   |      | 1.93  | 3.82 | 0.077 |
| 140. | BD | ( 1 ) | O 26- | H 56 | 1106. | RY  | ( 1 ) | C 34   |      | 4.60  | 2.11 | 0.088 |
| 140. | BD | ( 1 ) | O 26- | H 56 | 1112. | RY  | ( 7 ) | C 34   |      | 0.83  | 3.95 | 0.051 |
| 140. | BD | ( 1 ) | O 26- | H 56 | 1237. | RY  | ( 1 ) | H 56   |      | 1.25  | 1.91 | 0.044 |
| 140. | BD | ( 1 ) | O 26- | H 56 | 1239. | RY  | ( 3 ) | H 56   |      | 0.54  | 3.02 | 0.036 |
| 140. | BD | ( 1 ) | O 26- | H 56 | 1240. | RY  | ( 4 ) | H 56   |      | 1.21  | 3.14 | 0.055 |
| 141. | BD | ( 1 ) | C 27- | C 28 | 193.  | BD* | ( 1 ) | O 16-  | C 28 | 0.61  | 0.75 | 0.019 |
| 141. | BD | ( 1 ) | C 27- | C 28 | 212.  | BD* | ( 1 ) | C 29-  | C 30 | 1.83  | 0.87 | 0.036 |
| 141. | BD | ( 1 ) | C 27- | C 28 | 665.  | RY  | ( 2 ) | O 17   |      | 0.86  | 1.83 | 0.035 |
| 141. | BD | ( 1 ) | C 27- | C 28 | 928.  | RY  | ( 5 ) | C 27   |      | 0.72  | 2.86 | 0.041 |
| 141. | BD | ( 1 ) | C 27- | C 28 | 938.  | RY  | (15)  | C 27   |      | 0.61  | 3.09 | 0.039 |
| 141. | BD | ( 1 ) | C 27- | C 28 | 953.  | RY  | ( 4 ) | C 28   |      | 0.99  | 2.13 | 0.041 |
| 141. | BD | ( 1 ) | C 27- | C 28 | 957.  | RY  | ( 8 ) | C 28   |      | 0.87  | 2.86 | 0.044 |
| 142. | BD | ( 1 ) | C 27- | H 57 | 209.  | BD* | ( 1 ) | C 27-  | H 57 | 10.50 | 0.77 | 0.080 |
| 142. | BD | ( 1 ) | C 27- | H 57 | 210.  | BD* | ( 1 ) | C 28-  | C 29 | 4.78  | 0.71 | 0.052 |
| 142. | BD | ( 1 ) | C 27- | H 57 | 211.  | BD* | ( 1 ) | C 28-  | H 58 | 1.01  | 0.83 | 0.026 |
| 142. | BD | ( 1 ) | C 27- | H 57 | 612.  | RY  | ( 1 ) | O 15   |      | 1.44  | 1.49 | 0.041 |
| 142. | BD | ( 1 ) | C 27- | H 57 | 664.  | RY  | ( 1 ) | O 17   |      | 2.36  | 1.48 | 0.053 |
| 142. | BD | ( 1 ) | C 27- | H 57 | 927.  | RY  | ( 4 ) | C 27   |      | 1.27  | 1.79 | 0.043 |
| 142. | BD | ( 1 ) | C 27- | H 57 | 931.  | RY  | ( 8 ) | C 27   |      | 0.59  | 2.60 | 0.035 |
| 142. | BD | ( 1 ) | C 27- | H 57 | 1242. | RY  | ( 1 ) | H 57   |      | 2.27  | 1.58 | 0.054 |
| 142. | BD | ( 1 ) | C 27- | H 57 | 1245. | RY  | ( 4 ) | H 57   |      | 1.38  | 2.81 | 0.056 |
| 143. | BD | ( 1 ) | C 28- | C 29 | 187.  | BD* | ( 1 ) | Sb 13- | O 16 | 0.53  | 0.76 | 0.018 |
| 143. | BD | ( 1 ) | C 28- | C 29 | 190.  | BD* | ( 1 ) | Sb 14- | O 19 | 0.51  | 0.77 | 0.018 |
| 143. | BD | ( 1 ) | C 28- | C 29 | 192.  | BD* | ( 1 ) | O 15-  | C 27 | 0.66  | 0.97 | 0.023 |
| 143. | BD | ( 1 ) | C 28- | C 29 | 196.  | BD* | ( 1 ) | O 18-  | C 30 | 1.22  | 0.89 | 0.029 |
| 143. | BD | ( 1 ) | C 28- | C 29 | 950.  | RY  | ( 1 ) | C 28   |      | 0.92  | 1.68 | 0.035 |
| 143. | BD | ( 1 ) | C 28- | C 29 | 979.  | RY  | ( 4 ) | C 29   |      | 0.82  | 2.20 | 0.038 |
| 143. | BD | ( 1 ) | C 28- | C 29 | 997.  | RY  | (22)  | C 29   |      | 0.65  | 9.82 | 0.072 |
| 144. | BD | ( 1 ) | C 28- | H 58 | 192.  | BD* | ( 1 ) | O 15-  | C 27 | 1.28  | 0.86 | 0.030 |
| 144. | BD | ( 1 ) | C 28- | H 58 | 193.  | BD* | ( 1 ) | O 16-  | C 28 | 1.29  | 0.65 | 0.026 |
| 144. | BD | ( 1 ) | C 28- | H 58 | 197.  | BD* | ( 1 ) | O 19-  | C 29 | 3.62  | 0.70 | 0.045 |
| 144. | BD | ( 1 ) | C 28- | H 58 | 211.  | BD* | ( 1 ) | C 28-  | H 58 | 5.30  | 0.92 | 0.062 |
| 144. | BD | ( 1 ) | C 28- | H 58 | 951.  | RY  | ( 2 ) | C 28   |      | 0.58  | 1.77 | 0.029 |
| 144. | BD | ( 1 ) | C 28- | H 58 | 952.  | RY  | ( 3 ) | C 28   |      | 1.74  | 1.92 | 0.052 |
| 144. | BD | ( 1 ) | C 28- | H 58 | 956.  | RY  | ( 7 ) | C 28   |      | 0.63  | 2.46 | 0.035 |
| 144. | BD | ( 1 ) | C 28- | H 58 | 961.  | RY  | (12)  | C 28   |      | 0.70  | 4.47 | 0.050 |
| 144. | BD | ( 1 ) | C 28- | H 58 | 979.  | RY  | ( 4 ) | C 29   |      | 0.67  | 2.10 | 0.034 |
| 144. | BD | ( 1 ) | C 28- | H 58 | 1247. | RY  | ( 1 ) | H 58   |      | 1.84  | 1.74 | 0.050 |
| 144. | BD | ( 1 ) | C 28- | H 58 | 1250. | RY  | ( 4 ) | H 58   |      | 0.97  | 3.11 | 0.049 |
| 145. | BD | ( 1 ) | C 29- | C 30 | 197.  | BD* | ( 1 ) | O 19-  | C 29 | 0.58  | 0.79 | 0.019 |
| 145. | BD | ( 1 ) | C 29- | C 30 | 208.  | BD* | ( 1 ) | C 27-  | C 28 | 1.23  | 0.87 | 0.029 |
| 145. | BD | ( 1 ) | C 29- | C 30 | 718.  | RY  | ( 3 ) | O 19   |      | 0.58  | 2.01 | 0.030 |
| 145. | BD | ( 1 ) | C 29- | C 30 | 743.  | RY  | ( 2 ) | O 20   |      | 0.54  | 1.83 | 0.028 |
| 145. | BD | ( 1 ) | C 29- | C 30 | 953.  | RY  | ( 4 ) | C 28   |      | 0.56  | 2.11 | 0.031 |
| 145. | BD | ( 1 ) | C 29- | C 30 | 978.  | RY  | ( 3 ) | C 29   |      | 0.77  | 2.09 | 0.036 |
| 145. | BD | ( 1 ) | C 29- | C 30 | 984.  | RY  | ( 9 ) | C 29   |      | 0.70  | 3.13 | 0.042 |
| 145. | BD | ( 1 ) | C 29- | C 30 | 1008. | RY  | ( 7 ) | C 30   |      | 0.65  | 2.67 | 0.037 |
| 145. | BD | ( 1 ) | C 29- | C 30 | 1013. | RY  | (12)  | C 30   |      | 0.52  | 2.45 | 0.032 |
| 145. | BD | ( 1 ) | C 29- | C 30 | 1018. | RY  | (17)  | C 30   |      | 0.60  | 2.58 | 0.035 |
| 146. | BD | ( 1 ) | C 29- | H 59 | 190.  | BD* | ( 1 ) | Sb 14- | O 19 | 0.86  | 0.64 | 0.021 |
| 146. | BD | ( 1 ) | C 29- | H 59 | 193.  | BD* | ( 1 ) | O 16-  | C 28 | 4.29  | 0.64 | 0.047 |
| 146. | BD | ( 1 ) | C 29- | H 59 | 196.  | BD* | ( 1 ) | O 18-  | C 30 | 0.63  | 0.77 | 0.020 |
| 146. | BD | ( 1 ) | C 29- | H 59 | 197.  | BD* | ( 1 ) | O 19-  | C 29 | 0.86  | 0.69 | 0.022 |
| 146. | BD | ( 1 ) | C 29- | H 59 | 212.  | BD* | ( 1 ) | C 29-  | C 30 | 0.55  | 0.76 | 0.018 |
| 146. | BD | ( 1 ) | C 29- | H 59 | 213.  | BD* | ( 1 ) | C 29-  | H 59 | 6.17  | 0.90 | 0.066 |
| 146. | BD | ( 1 ) | C 29- | H 59 | 214.  | BD* | ( 1 ) | C 30-  | H 60 | 0.60  | 0.87 | 0.020 |
| 146. | BD | ( 1 ) | C 29- | H 59 | 977.  | RY  | ( 2 ) | C 29   |      | 1.31  | 1.81 | 0.043 |
| 146. | BD | ( 1 ) | C 29- | H 59 | 979.  | RY  | ( 4 ) | C 29   |      | 0.58  | 2.08 | 0.031 |
| 146. | BD | ( 1 ) | C 29- | H 59 | 982.  | RY  | ( 7 ) | C 29   |      | 0.81  | 2.34 | 0.039 |
| 146. | BD | ( 1 ) | C 29- | H 59 | 985.  | RY  | (10)  | C 29   |      | 0.86  | 4.20 | 0.054 |
| 146. | BD | ( 1 ) | C 29- | H 59 | 997.  | RY  | (22)  | C 29   |      | 0.54  | 9.70 | 0.065 |
| 146. | BD | ( 1 ) | C 29- | H 59 | 1252. | RY  | ( 1 ) | H 59   |      | 2.46  | 1.41 | 0.053 |
| 146. | BD | ( 1 ) | C 29- | H 59 | 1255. | RY  | ( 4 ) | H 59   |      | 1.00  | 3.10 | 0.050 |
| 147. | BD | ( 1 ) | C 30- | H 60 | 208.  | BD* | ( 1 ) | C 27-  | C 28 | 0.90  | 0.71 | 0.023 |
| 147. | BD | ( 1 ) | C 30- | H 60 | 210.  | BD* | ( 1 ) | C 28-  | C 29 | 0.89  | 0.73 | 0.023 |
| 147. | BD | ( 1 ) | C 30- | H 60 | 213.  | BD* | ( 1 ) | C 29-  | H 59 | 3.72  | 0.84 | 0.050 |
| 147. | BD | ( 1 ) | C 30- | H 60 | 214.  | BD* | ( 1 ) | C 30-  | H 60 | 6.18  | 0.82 | 0.063 |
| 147. | BD | ( 1 ) | C 30- | H 60 | 690.  | RY  | ( 1 ) | O 18   |      | 1.22  | 1.52 | 0.038 |
| 147. | BD | ( 1 ) | C 30- | H 60 | 742.  | RY  | ( 1 ) | O 20   |      | 2.58  | 1.50 | 0.056 |
| 147. | BD | ( 1 ) | C 30- | H 60 | 1011. | RY  | (10)  | C 30   |      | 0.51  | 2.40 | 0.031 |
| 147. | BD | ( 1 ) | C 30- | H 60 | 1257. | RY  | ( 1 ) | H 60   |      | 1.93  | 2.15 | 0.057 |
| 147. | BD | ( 1 ) | C 30- | H 60 | 1259. | RY  | ( 3 ) | H 60   |      | 0.52  | 2.59 | 0.033 |
| 147. | BD | ( 1 ) | C 30- | H 60 | 1260. | RY  | ( 4 ) | H 60   |      | 0.52  | 2.79 | 0.034 |
| 148. | BD | ( 1 ) | C 31- | C 32 | 200.  | BD* | ( 1 ) | O 21-  | C 32 | 0.73  | 0.75 | 0.021 |
| 148. | BD | ( 1 ) | C 31- | C 32 | 219.  | BD* | ( 1 ) | C 33-  | C 34 | 0.93  | 0.89 | 0.026 |
| 148. | BD | ( 1 ) | C 31- | C 32 | 821.  | RY  | ( 2 ) | O 23   |      | 0.53  | 1.84 | 0.028 |
| 148. | BD | ( 1 ) | C 31- | C 32 | 1031. | RY  | ( 4 ) | C 31   |      | 0.51  | 2.73 | 0.033 |
| 148. | BD | ( 1 ) | C 31- | C 32 | 1043. | RY  | (16)  | C 31   |      | 0.58  | 2.96 | 0.037 |
| 148. | BD | ( 1 ) | C 31- | C 32 | 1044. | RY  | (17)  | C 31   |      | 0.69  | 2.52 | 0.037 |
| 148. | BD | ( 1 ) | C 31- | C 32 | 1056. | RY  | ( 3 ) | C 32   |      | 0.51  | 2.09 | 0.029 |
| 148. | BD | ( 1 ) | C 31- | C 32 | 1061. | RY  | ( 8 ) | C 32   |      | 0.67  | 2.47 | 0.036 |
| 148. | BD | ( 1 ) | C 31- | C 32 | 1083. | RY  | ( 4 ) | C 33   |      | 0.58  | 2.16 | 0.031 |
| 149. | BD | ( 1 ) | C 31- | H 61 | 189.  | BD* | ( 1 ) | Sb 13- | O 22 | 1.76  | 0.57 | 0.028 |
| 149. | BD | ( 1 ) | C 31- | H 61 | 216.  | BD* | ( 1 ) | C 31-  | H 61 | 5.98  | 0.82 | 0.062 |
| 149. | BD | ( 1 ) | C 31- | H 61 | 217.  | BD* | ( 1 ) | C 32-  | C 33 | 1.15  | 0.71 | 0.026 |
| 149. | BD | ( 1 ) | C 31- | H 61 | 218.  | BD* | ( 1 ) | C 32-  | H 62 | 4.27  | 0.85 | 0.054 |
| 149. | BD | ( 1 ) | C 31- | H 61 | 219.  | BD* | ( 1 ) | C 33-  | C 34 | 0.68  | 0.72 | 0.020 |
| 149. | BD | ( 1 ) | C 31- | H 61 | 794.  | RY  | ( 1 ) | O 22   |      | 1.42  | 1.50 | 0.041 |
| 149. | BD | ( 1 ) | C 31- | H 61 | 820.  | RY  | ( 1 ) | O 23   |      | 2.54  | 1.47 | 0.054 |
| 149. | BD | ( 1 ) | C 31- | H 61 | 1038. | RY  | (11)  | C 31   |      | 0.57  | 2.81 | 0.036 |
| 149. | BD | ( 1 ) | C 31- | H 61 | 1262. | RY  | ( 1 ) | H 61   |      | 1.86  | 2.06 | 0.055 |
| 149. | BD | ( 1 ) | C 31- | H 61 | 1264. | RY  | ( 3 ) | H 61   |      | 0.65  | 2.73 | 0.038 |
| 150. | BD | ( 1 ) | C 32- | C 33 | 191.  | BD* | ( 1 ) | Sb 14- | O 25 | 0.75  | 0.76 | 0.021 |
| 150. | BD | ( 1 ) | C 32- | C 33 | 201.  | BD* | ( 1 ) | O 22-  | C 31 | 1.44  | 0.90 | 0.032 |
| 150. | BD | ( 1 ) | C 32- | C 33 | 204.  | BD* | ( 1 ) | O 24-  | C 34 | 0.74  | 0.93 | 0.023 |
| 150. | BD | ( 1 ) | C 32- | C 33 | 1057. | RY  | ( 4 ) | C 32   |      | 0.58  | 2.24 | 0.032 |

|                         |                           |       |       |       |
|-------------------------|---------------------------|-------|-------|-------|
| 150. BD ( 1) C 32- C 33 | 1076. RY (23) C 32        | 0.61  | 13.45 | 0.081 |
| 150. BD ( 1) C 32- C 33 | 1080. RY ( 1) C 33        | 0.58  | 1.71  | 0.028 |
| 150. BD ( 1) C 32- C 33 | 1083. RY ( 4) C 33        | 0.73  | 2.15  | 0.035 |
| 151. BD ( 1) C 32- H 62 | 188. BD* ( 1) Sb 13- O 21 | 0.54  | 0.64  | 0.017 |
| 151. BD ( 1) C 32- H 62 | 200. BD* ( 1) O 21- C 32  | 0.92  | 0.64  | 0.022 |
| 151. BD ( 1) C 32- H 62 | 201. BD* ( 1) O 22- C 31  | 0.54  | 0.80  | 0.019 |
| 151. BD ( 1) C 32- H 62 | 205. BD* ( 1) O 25- C 33  | 3.75  | 0.67  | 0.045 |
| 151. BD ( 1) C 32- H 62 | 215. BD* ( 1) C 31- C 32  | 0.56  | 0.79  | 0.019 |
| 151. BD ( 1) C 32- H 62 | 216. BD* ( 1) C 31- H 61  | 0.75  | 0.87  | 0.023 |
| 151. BD ( 1) C 32- H 62 | 217. BD* ( 1) C 32- C 33  | 0.52  | 0.77  | 0.018 |
| 151. BD ( 1) C 32- H 62 | 218. BD* ( 1) C 32- H 62  | 5.84  | 0.90  | 0.065 |
| 151. BD ( 1) C 32- H 62 | 1055. RY ( 2) C 32        | 0.82  | 1.84  | 0.035 |
| 151. BD ( 1) C 32- H 62 | 1057. RY ( 4) C 32        | 0.72  | 2.13  | 0.035 |
| 151. BD ( 1) C 32- H 62 | 1060. RY ( 7) C 32        | 0.85  | 2.43  | 0.041 |
| 151. BD ( 1) C 32- H 62 | 1063. RY (10) C 32        | 0.88  | 4.01  | 0.053 |
| 151. BD ( 1) C 32- H 62 | 1267. RY ( 1) H 62        | 2.40  | 1.39  | 0.052 |
| 151. BD ( 1) C 32- H 62 | 1270. RY ( 4) H 62        | 1.15  | 3.08  | 0.053 |
| 152. BD ( 1) C 33- C 34 | 215. BD* ( 1) C 31- C 32  | 1.68  | 0.90  | 0.035 |
| 152. BD ( 1) C 33- C 34 | 899. RY ( 2) O 26         | 0.85  | 1.84  | 0.035 |
| 152. BD ( 1) C 33- C 34 | 1083. RY ( 4) C 33        | 0.85  | 2.15  | 0.038 |
| 152. BD ( 1) C 33- C 34 | 1087. RY ( 8) C 33        | 0.57  | 3.16  | 0.038 |
| 152. BD ( 1) C 33- C 34 | 1110. RY ( 5) C 34        | 0.84  | 2.86  | 0.044 |
| 153. BD ( 1) C 33- H 63 | 191. BD* ( 1) Sb 14- O 25 | 0.55  | 0.67  | 0.017 |
| 153. BD ( 1) C 33- H 63 | 200. BD* ( 1) O 21- C 32  | 3.23  | 0.65  | 0.041 |
| 153. BD ( 1) C 33- H 63 | 204. BD* ( 1) O 24- C 34  | 1.11  | 0.84  | 0.027 |
| 153. BD ( 1) C 33- H 63 | 205. BD* ( 1) O 25- C 33  | 1.25  | 0.68  | 0.026 |
| 153. BD ( 1) C 33- H 63 | 220. BD* ( 1) C 33- H 63  | 5.41  | 0.92  | 0.063 |
| 153. BD ( 1) C 33- H 63 | 1057. RY ( 4) C 32        | 0.52  | 2.14  | 0.030 |
| 153. BD ( 1) C 33- H 63 | 1081. RY ( 2) C 33        | 1.07  | 1.77  | 0.039 |
| 153. BD ( 1) C 33- H 63 | 1082. RY ( 3) C 33        | 1.18  | 1.99  | 0.043 |
| 153. BD ( 1) C 33- H 63 | 1086. RY ( 7) C 33        | 0.92  | 2.61  | 0.044 |
| 153. BD ( 1) C 33- H 63 | 1091. RY (12) C 33        | 0.83  | 4.54  | 0.055 |
| 153. BD ( 1) C 33- H 63 | 1095. RY (16) C 33        | 0.51  | 5.72  | 0.048 |
| 153. BD ( 1) C 33- H 63 | 1101. RY (22) C 33        | 0.57  | 5.43  | 0.050 |
| 153. BD ( 1) C 33- H 63 | 1272. RY ( 1) H 63        | 1.80  | 1.78  | 0.050 |
| 153. BD ( 1) C 33- H 63 | 1275. RY ( 4) H 63        | 1.31  | 2.98  | 0.056 |
| 154. BD ( 1) C 34- H 64 | 217. BD* ( 1) C 32- C 33  | 4.50  | 0.69  | 0.050 |
| 154. BD ( 1) C 34- H 64 | 220. BD* ( 1) C 33- H 63  | 1.01  | 0.83  | 0.026 |
| 154. BD ( 1) C 34- H 64 | 221. BD* ( 1) C 34- H 64  | 10.12 | 0.78  | 0.079 |
| 154. BD ( 1) C 34- H 64 | 846. RY ( 1) O 24         | 1.27  | 1.49  | 0.039 |
| 154. BD ( 1) C 34- H 64 | 898. RY ( 1) O 26         | 2.35  | 1.46  | 0.052 |
| 154. BD ( 1) C 34- H 64 | 1109. RY ( 4) C 34        | 1.37  | 1.75  | 0.044 |
| 154. BD ( 1) C 34- H 64 | 1113. RY ( 8) C 34        | 0.54  | 2.67  | 0.034 |
| 154. BD ( 1) C 34- H 64 | 1277. RY ( 1) H 64        | 1.98  | 1.59  | 0.050 |
| 154. BD ( 1) C 34- H 64 | 1279. RY ( 3) H 64        | 1.33  | 2.82  | 0.055 |
